# Supplementary material for: Different gut microbial types were found in captive striped hamsters
Source: PeerJ journal article supplement (doi:10.7717/peerj.16365), 2023-11-06

# Rarefaction curves

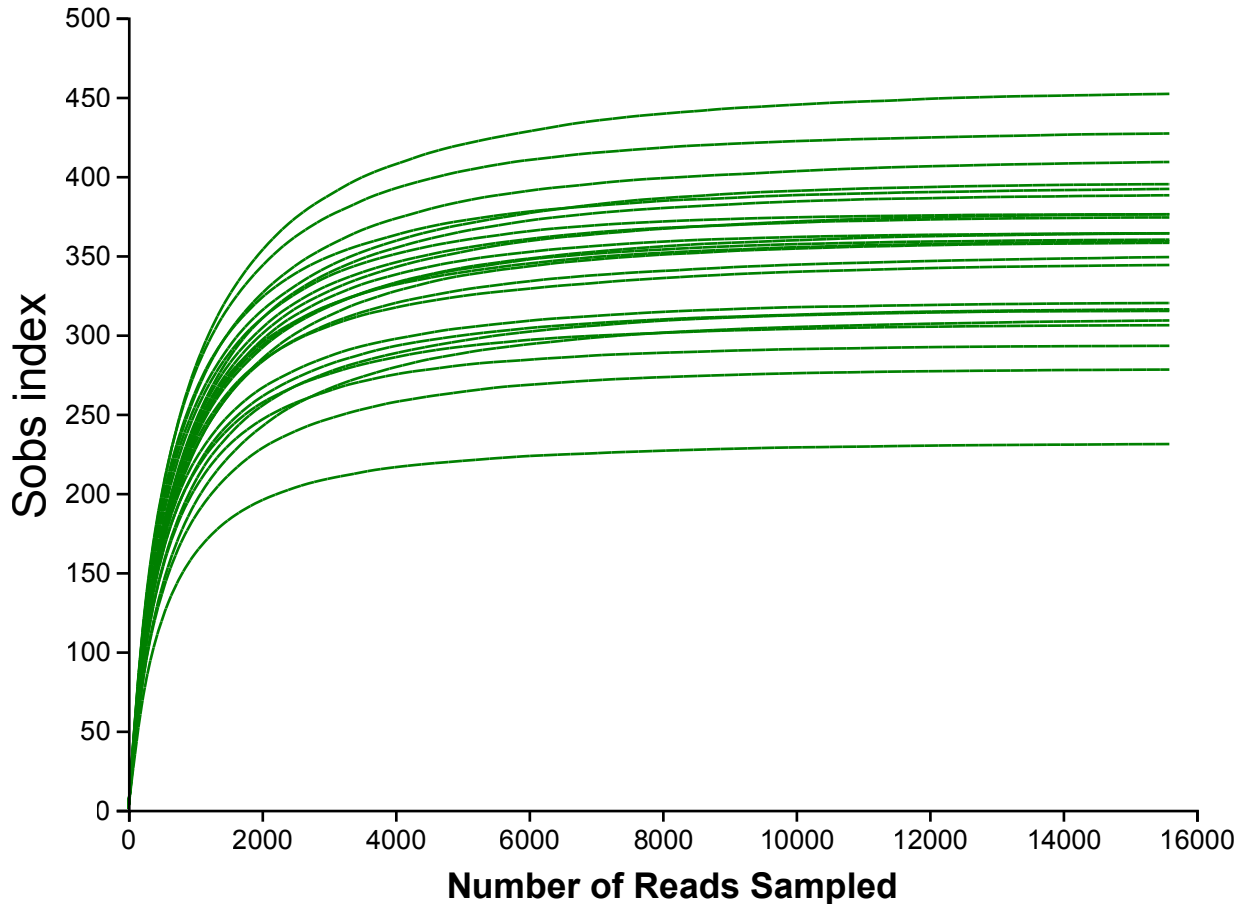

Supplement: Fig_S1.pdf [file Fig_S1.pdf]
