# Supplementary material for: Different gut microbial types were found in captive striped hamsters
Source: PeerJ journal article supplement (doi:10.7717/peerj.16365), 2023-11-06

# Optimal number of clusters

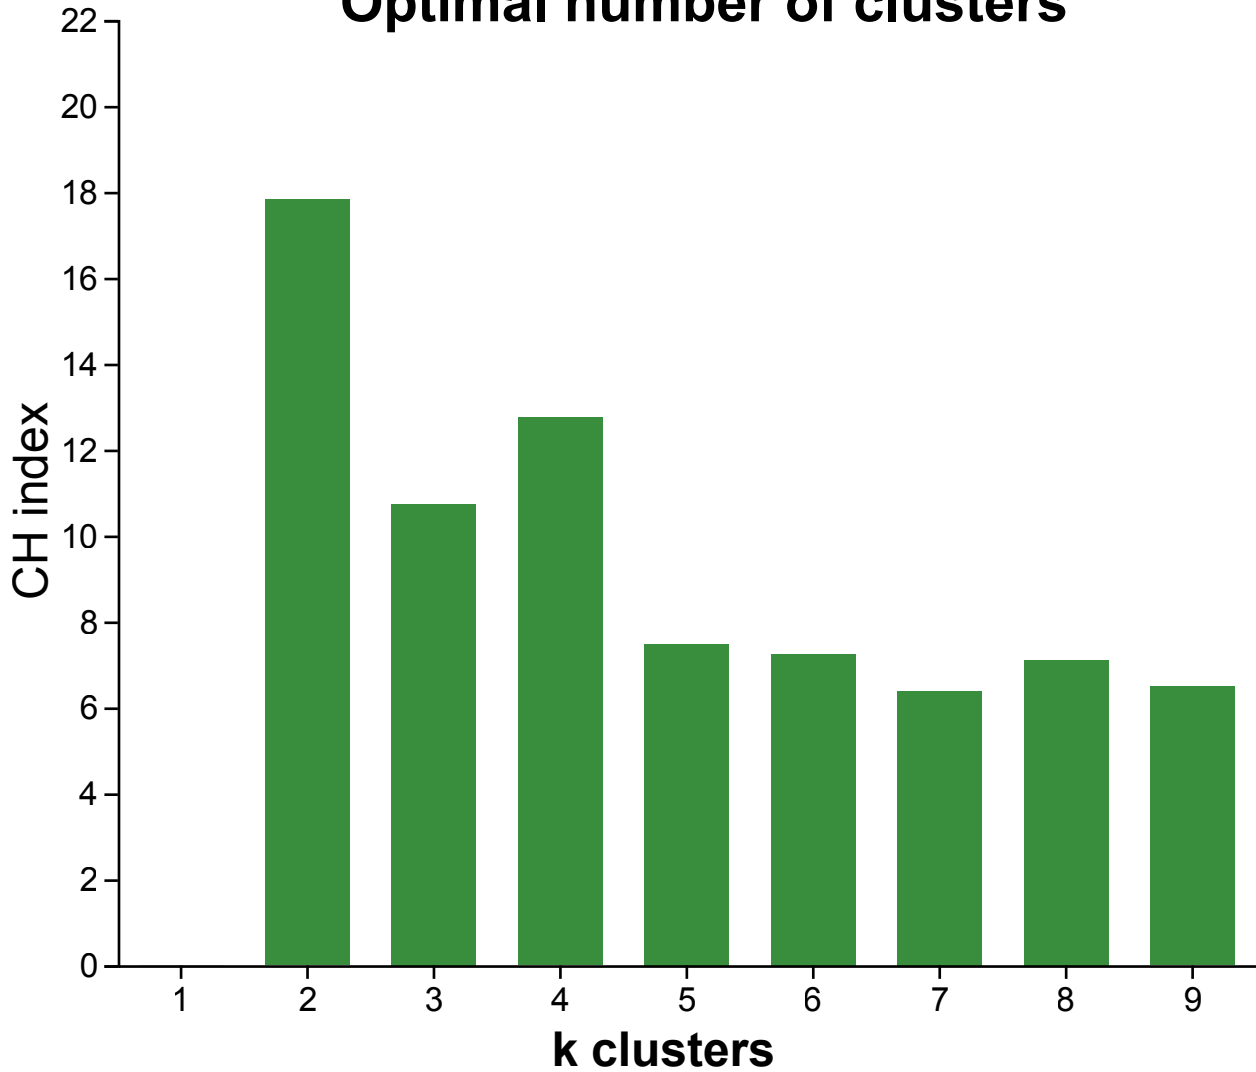

Supplement: Fig_S2.pdf [file Fig_S2.pdf]
