# Supplementary material for: Different gut microbial types were found in captive striped hamsters
Source: PeerJ. 2023 Nov 6;11:e16365. doi: 10.7717/peerj.16365 (PMC10634337; doi:10.7717/peerj.16365)
Supplement: Supplemental Information 5 [file peerj-11-16365-s005.xls]

## Sheet: Mapping file
Sample_ID	BioSample	Location	Collection_Date	Host	Sex
N01	SAMN33406938	Qufu Normal Univ	2022-06	Cricetulus barabensis	M
N02	SAMN33406939	Qufu Normal Univ	2022-06	Cricetulus barabensis	M
N03	SAMN33406940	Qufu Normal Univ	2022-06	Cricetulus barabensis	M
N04	SAMN33406941	Qufu Normal Univ	2022-06	Cricetulus barabensis	M
N05	SAMN33406942	Qufu Normal Univ	2022-06	Cricetulus barabensis	F
N06	SAMN33406943	Qufu Normal Univ	2022-06	Cricetulus barabensis	M
N07	SAMN33406944	Qufu Normal Univ	2022-06	Cricetulus barabensis	F
N08	SAMN33406945	Qufu Normal Univ	2022-06	Cricetulus barabensis	F
N09	SAMN33406946	Qufu Normal Univ	2022-06	Cricetulus barabensis	F
N10	SAMN33406947	Qufu Normal Univ	2022-06	Cricetulus barabensis	F
N11	SAMN33406948	Qufu Normal Univ	2022-06	Cricetulus barabensis	F
N12	SAMN33406949	Qufu Normal Univ	2022-06	Cricetulus barabensis	F
N13	SAMN33406950	Qufu Normal Univ	2022-06	Cricetulus barabensis	F
N14	SAMN33406951	Qufu Normal Univ	2022-06	Cricetulus barabensis	F
N15	SAMN33406952	Qufu Normal Univ	2022-06	Cricetulus barabensis	F
N16	SAMN33406953	Qufu Normal Univ	2022-06	Cricetulus barabensis	F
N17	SAMN33406954	Qufu Normal Univ	2022-06	Cricetulus barabensis	M
N18	SAMN33406955	Qufu Normal Univ	2022-06	Cricetulus barabensis	M
N19	SAMN33406956	Qufu Normal Univ	2022-06	Cricetulus barabensis	F
N20	SAMN33406957	Qufu Normal Univ	2022-06	Cricetulus barabensis	F
N21	SAMN33406958	Qufu Normal Univ	2022-06	Cricetulus barabensis	F
N22	SAMN33406959	Qufu Normal Univ	2022-06	Cricetulus barabensis	F
N23	SAMN33406960	Qufu Normal Univ	2022-06	Cricetulus barabensis	F
N24	SAMN33406961	Qufu Normal Univ	2022-06	Cricetulus barabensis	M

## Sheet: ASV table
Domain	Kingdom	Phylum	Class	Order	Family	Genus	Species	ASV	N19	N02	N10	N04	N01	N17	N07	N08	N24	N11	N20	N23	N09	N21	N12	N13	N03	N14	N15	N22	N06	N18	N16	N05
d__Bacteria	k__norank_d__Bacteria	p__Firmicutes	c__Clostridia	o__Lachnospirales	f__Lachnospiraceae	g__unclassified_f__Lachnospiraceae	s__unclassified_f__Lachnospiraceae	ASV1858	0	0	10	0	0	0	0	0	0	15	0	0	10	0	0	0	7	0	0	0	0	19	0	0
d__Bacteria	k__norank_d__Bacteria	p__Firmicutes	c__Bacilli	o__RF39	f__norank_o__RF39	g__norank_f__norank_o__RF39	s__uncultured_bacterium_g__norank_f__norank_o__RF39	ASV2845	0	0	0	0	0	0	0	0	0	0	0	12	0	0	3	0	0	0	0	0	0	0	0	0
d__Bacteria	k__norank_d__Bacteria	p__Firmicutes	c__Bacilli	o__RF39	f__norank_o__RF39	g__norank_f__norank_o__RF39	s__unclassified_g__norank_f__norank_o__RF39	ASV1082	0	0	0	0	0	0	0	0	0	0	0	6	0	0	0	5	0	9	0	0	0	0	0	0
d__Bacteria	k__norank_d__Bacteria	p__Firmicutes	c__Clostridia	o__Oscillospirales	f__Ruminococcaceae	g__norank_f__Ruminococcaceae	s__unclassified_g__norank_f__Ruminococcaceae	ASV2785	0	0	0	0	0	0	0	4	0	0	0	0	0	0	0	0	0	0	0	0	0	0	0	0
d__Bacteria	k__norank_d__Bacteria	p__Firmicutes	c__Bacilli	o__RF39	f__norank_o__RF39	g__norank_f__norank_o__RF39	s__uncultured_bacterium_g__norank_f__norank_o__RF39	ASV2843	0	0	0	0	0	0	0	0	0	0	0	0	0	0	3	0	0	8	0	0	0	0	0	0
d__Bacteria	k__norank_d__Bacteria	p__Firmicutes	c__Clostridia	o__Lachnospirales	f__Lachnospiraceae	g__unclassified_f__Lachnospiraceae	s__unclassified_f__Lachnospiraceae	ASV1855	0	0	0	20	0	0	0	20	0	0	0	0	0	0	0	0	0	0	0	0	0	21	0	0
d__Bacteria	k__norank_d__Bacteria	p__Firmicutes	c__Clostridia	o__Monoglobales	f__Monoglobaceae	g__Monoglobus	s__uncultured_bacterium_g__Monoglobus	ASV2242	0	0	0	0	0	0	0	0	0	0	0	0	0	0	0	0	0	0	0	3	0	0	0	0
d__Bacteria	k__norank_d__Bacteria	p__Bacteroidota	c__Bacteroidia	o__Bacteroidales	f__Muribaculaceae	g__norank_f__Muribaculaceae	s__uncultured_bacterium_g__norank_f__Muribaculaceae	ASV2404	0	0	0	0	0	0	0	0	6	0	0	0	0	0	0	9	0	0	0	0	0	0	0	0
d__Bacteria	k__norank_d__Bacteria	p__Bacteroidota	c__Bacteroidia	o__Bacteroidales	f__Muribaculaceae	g__norank_f__Muribaculaceae	s__uncultured_bacterium_g__norank_f__Muribaculaceae	ASV2401	0	0	0	0	0	12	0	0	7	0	0	48	0	0	0	0	0	0	0	0	19	0	0	0
d__Bacteria	k__norank_d__Bacteria	p__Bacteroidota	c__Bacteroidia	o__Bacteroidales	f__Muribaculaceae	g__norank_f__Muribaculaceae	s__uncultured_bacterium_g__norank_f__Muribaculaceae	ASV2403	0	0	0	0	0	0	0	0	9	0	0	0	0	0	0	0	0	6	0	0	0	0	0	0
d__Bacteria	k__norank_d__Bacteria	p__Firmicutes	c__Clostridia	o__Lachnospirales	f__Lachnospiraceae	g__unclassified_f__Lachnospiraceae	s__unclassified_f__Lachnospiraceae	ASV1459	0	0	0	0	0	0	0	0	0	0	0	0	0	0	0	0	0	0	63	0	0	0	0	0
d__Bacteria	k__norank_d__Bacteria	p__Firmicutes	c__Clostridia	o__Lachnospirales	f__Lachnospiraceae	g__unclassified_f__Lachnospiraceae	s__unclassified_f__Lachnospiraceae	ASV1456	46	85	275	0	0	92	0	0	4	0	0	27	0	9	0	0	0	0	92	0	14	0	138	0
d__Bacteria	k__norank_d__Bacteria	p__Firmicutes	c__Clostridia	o__Lachnospirales	f__Lachnospiraceae	g__unclassified_f__Lachnospiraceae	s__unclassified_f__Lachnospiraceae	ASV1454	0	0	0	0	0	0	0	0	0	0	0	0	0	0	0	0	0	0	219	0	0	0	0	0
d__Bacteria	k__norank_d__Bacteria	p__Firmicutes	c__Clostridia	o__Lachnospirales	f__Lachnospiraceae	g__unclassified_f__Lachnospiraceae	s__unclassified_f__Lachnospiraceae	ASV1455	134	0	154	0	0	0	0	0	13	0	0	0	0	6	0	0	0	0	112	0	0	0	0	0
d__Bacteria	k__norank_d__Bacteria	p__Firmicutes	c__Clostridia	o__Lachnospirales	f__Lachnospiraceae	g__unclassified_f__Lachnospiraceae	s__unclassified_f__Lachnospiraceae	ASV1453	0	0	0	0	0	0	0	0	0	0	56	0	0	0	0	0	0	0	221	0	0	0	0	0
d__Bacteria	k__norank_d__Bacteria	p__Firmicutes	c__Clostridia	o__Clostridia_UCG-014	f__norank_o__Clostridia_UCG-014	g__norank_f__norank_o__Clostridia_UCG-014	s__uncultured_bacterium_g__norank_f__norank_o__Clostridia_UCG-014	ASV2787	0	0	0	0	0	0	0	3	0	0	0	0	0	0	0	0	0	0	0	0	0	0	0	0
d__Bacteria	k__norank_d__Bacteria	p__Firmicutes	c__Clostridia	o__Oscillospirales	f__Oscillospiraceae	g__Colidextribacter	s__unclassified_g__Colidextribacter	ASV3074	0	0	0	0	0	0	26	0	0	0	0	0	0	0	0	0	0	0	0	0	0	0	0	0
d__Bacteria	k__norank_d__Bacteria	p__Firmicutes	c__Clostridia	o__Lachnospirales	f__Lachnospiraceae	g__unclassified_f__Lachnospiraceae	s__unclassified_f__Lachnospiraceae	ASV1926	5	0	0	43	0	0	0	0	0	0	0	0	0	0	0	0	0	0	0	0	0	0	0	0
d__Bacteria	k__norank_d__Bacteria	p__Firmicutes	c__Clostridia	o__Monoglobales	f__Monoglobaceae	g__Monoglobus	s__unclassified_g__Monoglobus	ASV1056	0	9	5	0	0	0	19	0	2	0	0	0	0	0	0	0	11	0	0	0	0	7	0	0
d__Bacteria	k__norank_d__Bacteria	p__Firmicutes	c__Clostridia	o__Lachnospirales	f__Lachnospiraceae	g__unclassified_f__Lachnospiraceae	s__unclassified_f__Lachnospiraceae	ASV1923	0	0	70	53	0	0	33	0	0	0	0	0	0	0	0	0	0	0	0	0	0	0	0	0
d__Bacteria	k__norank_d__Bacteria	p__Firmicutes	c__Clostridia	o__Lachnospirales	f__Lachnospiraceae	g__unclassified_f__Lachnospiraceae	s__unclassified_f__Lachnospiraceae	ASV1921	0	0	0	79	0	35	14	0	32	0	0	0	0	0	24	19	12	0	0	0	0	0	0	0
d__Bacteria	k__norank_d__Bacteria	p__Actinobacteriota	c__Actinobacteria	o__Corynebacteriales	f__Corynebacteriaceae	g__Corynebacterium	s__unclassified_g__Corynebacterium	ASV873	0	11	0	0	0	10	3	0	0	0	0	0	3	9	2	0	2	0	0	0	0	0	0	5
d__Bacteria	k__norank_d__Bacteria	p__Firmicutes	c__Clostridia	o__Oscillospirales	f__Oscillospiraceae	g__Oscillibacter	s__uncultured_bacterium_g__Oscillibacter	ASV2988	0	0	0	0	0	0	0	0	0	0	0	0	0	0	0	0	6	0	0	0	0	0	0	0
d__Bacteria	k__norank_d__Bacteria	p__Firmicutes	c__Bacilli	o__RF39	f__norank_o__RF39	g__norank_f__norank_o__RF39	s__uncultured_bacterium_g__norank_f__norank_o__RF39	ASV2444	0	0	0	0	0	0	0	0	0	0	31	0	0	0	0	0	0	0	0	0	0	0	0	0
d__Bacteria	k__norank_d__Bacteria	p__Firmicutes	c__Clostridia	o__Lachnospirales	f__Lachnospiraceae	g__Lachnospiraceae_NK4A136_group	s__uncultured_bacterium_g__Lachnospiraceae_NK4A136_group	ASV425	0	0	0	0	0	0	0	0	17	0	0	0	0	0	0	0	0	0	0	0	0	0	0	0
d__Bacteria	k__norank_d__Bacteria	p__Firmicutes	c__Bacilli	o__Lactobacillales	f__Lactobacillaceae	g__Lactobacillus	s__unclassified_g__Lactobacillus	ASV3002	0	0	0	0	0	0	0	0	0	0	0	70	0	0	0	0	0	0	0	0	0	0	0	0
d__Bacteria	k__norank_d__Bacteria	p__Bacteroidota	c__Bacteroidia	o__Bacteroidales	f__Muribaculaceae	g__norank_f__Muribaculaceae	s__uncultured_bacterium_g__norank_f__Muribaculaceae	ASV1840	0	0	0	0	0	46	0	0	6	0	13	29	0	19	0	53	0	15	0	0	0	27	7	0
d__Bacteria	k__norank_d__Bacteria	p__Bacteroidota	c__Bacteroidia	o__Bacteroidales	f__Muribaculaceae	g__norank_f__Muribaculaceae	s__uncultured_bacterium_g__norank_f__Muribaculaceae	ASV1841	0	0	29	0	0	15	0	0	8	0	5	0	9	3	0	22	0	18	0	0	0	24	12	0
d__Bacteria	k__norank_d__Bacteria	p__Bacteroidota	c__Bacteroidia	o__Bacteroidales	f__Muribaculaceae	g__norank_f__Muribaculaceae	s__uncultured_bacterium_g__norank_f__Muribaculaceae	ASV1842	0	0	0	0	0	0	0	0	0	0	0	0	0	0	0	0	0	0	0	0	0	23	0	0
d__Bacteria	k__norank_d__Bacteria	p__Bacteroidota	c__Bacteroidia	o__Bacteroidales	f__Muribaculaceae	g__norank_f__Muribaculaceae	s__uncultured_bacterium_g__norank_f__Muribaculaceae	ASV1847	5	6	6	0	0	10	0	0	6	0	15	10	0	0	0	0	9	0	0	0	11	22	0	0
d__Bacteria	k__norank_d__Bacteria	p__Firmicutes	c__unclassified_p__Firmicutes	o__unclassified_p__Firmicutes	f__unclassified_p__Firmicutes	g__unclassified_p__Firmicutes	s__unclassified_p__Firmicutes	ASV2996	0	0	0	0	0	0	0	0	0	0	0	0	0	0	0	0	3	0	0	0	0	0	0	0
d__Bacteria	k__norank_d__Bacteria	p__Bacteroidota	c__Bacteroidia	o__Bacteroidales	f__Muribaculaceae	g__norank_f__Muribaculaceae	s__uncultured_bacterium_g__norank_f__Muribaculaceae	ASV2716	0	0	0	0	0	0	0	0	0	0	0	0	0	0	0	24	0	0	0	0	0	0	0	0
d__Bacteria	k__norank_d__Bacteria	p__Firmicutes	c__Clostridia	o__Oscillospirales	f__Ruminococcaceae	g__unclassified_f__Ruminococcaceae	s__unclassified_f__Ruminococcaceae	ASV1790	0	0	2	0	0	0	8	0	0	0	5	2	4	0	0	0	4	0	0	0	0	0	0	0
d__Bacteria	k__norank_d__Bacteria	p__Bacteroidota	c__Bacteroidia	o__Bacteroidales	f__Muribaculaceae	g__norank_f__Muribaculaceae	s__uncultured_bacterium_g__norank_f__Muribaculaceae	ASV3047	20	0	0	0	0	0	0	0	0	0	0	0	0	0	0	0	0	0	0	0	0	0	0	0
d__Bacteria	k__norank_d__Bacteria	p__Firmicutes	c__Clostridia	o__Lachnospirales	f__Lachnospiraceae	g__unclassified_f__Lachnospiraceae	s__unclassified_f__Lachnospiraceae	ASV1631	9	0	0	0	0	0	0	0	50	0	0	0	0	9	0	0	0	0	0	0	0	8	0	0
d__Bacteria	k__norank_d__Bacteria	p__Firmicutes	c__Bacilli	o__RF39	f__norank_o__RF39	g__norank_f__norank_o__RF39	s__unclassified_g__norank_f__norank_o__RF39	ASV1552	0	0	37	42	0	0	0	0	0	0	0	0	0	0	0	17	0	0	10	0	118	0	8	0
d__Bacteria	k__norank_d__Bacteria	p__unclassified_k__norank_d__Bacteria	c__unclassified_k__norank_d__Bacteria	o__unclassified_k__norank_d__Bacteria	f__unclassified_k__norank_d__Bacteria	g__unclassified_k__norank_d__Bacteria	s__unclassified_k__norank_d__Bacteria	ASV2363	0	0	0	0	0	0	0	0	40	0	0	0	0	0	0	0	0	0	0	0	0	0	0	0
d__Bacteria	k__norank_d__Bacteria	p__Firmicutes	c__Clostridia	o__Lachnospirales	f__Lachnospiraceae	g__Lachnospiraceae_NK4A136_group	s__unclassified_g__Lachnospiraceae_NK4A136_group	ASV2313	0	0	15	0	0	0	0	0	0	0	0	0	0	0	0	0	0	0	0	0	0	0	0	0
d__Bacteria	k__norank_d__Bacteria	p__Bacteroidota	c__Bacteroidia	o__Bacteroidales	f__Muribaculaceae	g__norank_f__Muribaculaceae	s__unclassified_g__norank_f__Muribaculaceae	ASV891	0	0	0	0	12	0	7	5	0	0	0	20	0	0	0	0	0	0	0	0	6	0	7	3
d__Bacteria	k__norank_d__Bacteria	p__Bacteroidota	c__Bacteroidia	o__Bacteroidales	f__Muribaculaceae	g__norank_f__Muribaculaceae	s__unclassified_g__norank_f__Muribaculaceae	ASV895	4	0	21	15	3	0	0	6	0	16	8	0	0	0	8	5	14	14	0	0	15	4	0	3
d__Bacteria	k__norank_d__Bacteria	p__Firmicutes	c__Clostridia	o__Monoglobales	f__Monoglobaceae	g__Monoglobus	s__unclassified_g__Monoglobus	ASV313	0	3	5	0	0	0	4	0	0	0	0	4	0	5	0	0	8	0	0	0	0	0	0	0
d__Bacteria	k__norank_d__Bacteria	p__Firmicutes	c__Clostridia	o__Lachnospirales	f__Lachnospiraceae	g__unclassified_f__Lachnospiraceae	s__unclassified_f__Lachnospiraceae	ASV646	0	0	0	0	0	0	0	529	0	0	0	0	61	0	114	0	307	0	677	0	0	0	0	43
d__Bacteria	k__norank_d__Bacteria	p__Firmicutes	c__Clostridia	o__Lachnospirales	f__Lachnospiraceae	g__unclassified_f__Lachnospiraceae	s__unclassified_f__Lachnospiraceae	ASV641	0	70	182	67	22	0	75	38	88	0	27	15	34	16	19	26	107	112	21	0	32	42	61	52
d__Bacteria	k__norank_d__Bacteria	p__Bacteroidota	c__Bacteroidia	o__Bacteroidales	f__Bacteroidaceae	g__Bacteroides	s__uncultured_bacterium_g__Bacteroides	ASV893	0	3	27	8	0	21	2	2	13	0	7	5	0	0	7	8	0	0	3	6	17	25	5	5
d__Bacteria	k__norank_d__Bacteria	p__Bacteroidota	c__Bacteroidia	o__Bacteroidales	f__Muribaculaceae	g__norank_f__Muribaculaceae	s__uncultured_bacterium_g__norank_f__Muribaculaceae	ASV509	0	0	0	2	0	0	0	0	0	9	0	13	0	0	0	0	0	7	0	0	8	0	5	0
d__Bacteria	k__norank_d__Bacteria	p__Firmicutes	c__Clostridia	o__Lachnospirales	f__Lachnospiraceae	g__unclassified_f__Lachnospiraceae	s__unclassified_f__Lachnospiraceae	ASV2486	0	0	0	0	0	0	0	0	0	0	5	0	0	0	0	0	0	15	0	0	25	0	0	0
d__Bacteria	k__norank_d__Bacteria	p__Actinobacteriota	c__Coriobacteriia	o__Coriobacteriales	f__Eggerthellaceae	g__Enterorhabdus	s__uncultured_bacterium_g__Enterorhabdus	ASV2733	0	0	0	0	0	0	0	0	0	0	0	0	0	0	0	7	0	0	0	0	0	0	0	0
d__Bacteria	k__norank_d__Bacteria	p__Deferribacterota	c__Deferribacteres	o__Deferribacterales	f__Deferribacteraceae	g__Mucispirillum	s__uncultured_Deferribacteres_bacterium_g__Mucispirillum	ASV2997	0	0	0	0	0	0	0	0	0	0	0	0	0	0	0	0	2	0	0	0	0	0	0	0
d__Bacteria	k__norank_d__Bacteria	p__Firmicutes	c__Clostridia	o__Oscillospirales	f__Oscillospiraceae	g__unclassified_f__Oscillospiraceae	s__unclassified_f__Oscillospiraceae	ASV2001	0	0	0	9	0	0	0	0	0	0	0	0	0	0	0	0	0	0	0	0	0	0	0	0
d__Bacteria	k__norank_d__Bacteria	p__Firmicutes	c__Clostridia	o__Oscillospirales	f__Oscillospiraceae	g__UCG-002	s__unclassified_g__UCG-002	ASV127	0	0	0	0	0	10	32	0	0	0	19	16	0	0	9	30	0	0	0	0	0	50	9	33
d__Bacteria	k__norank_d__Bacteria	p__Firmicutes	c__Clostridia	o__Oscillospirales	f__Oscillospiraceae	g__unclassified_f__Oscillospiraceae	s__unclassified_f__Oscillospiraceae	ASV2394	0	0	0	0	0	0	0	0	13	0	0	0	0	0	0	0	0	0	0	0	0	0	0	0
d__Bacteria	k__norank_d__Bacteria	p__Firmicutes	c__Clostridia	o__Lachnospirales	f__Lachnospiraceae	g__unclassified_f__Lachnospiraceae	s__unclassified_f__Lachnospiraceae	ASV2000	0	0	9	6	0	0	0	0	0	0	0	0	0	0	0	0	0	0	0	0	20	0	0	0
d__Bacteria	k__norank_d__Bacteria	p__Firmicutes	c__Bacilli	o__Lactobacillales	f__Lactobacillaceae	g__Lactobacillus	s__unclassified_g__Lactobacillus	ASV2992	0	0	0	0	0	0	0	0	0	0	0	0	0	0	0	0	3	0	0	0	0	0	0	0
d__Bacteria	k__norank_d__Bacteria	p__Firmicutes	c__Bacilli	o__Bacillales	f__Bacillaceae	g__Bacillus	s__Lactobacillus_vaginalis_g__Bacillus	ASV101	91	125	42	84	217	88	115	105	0	191	39	131	223	101	51	78	151	13	55	93	118	111	61	124
d__Bacteria	k__norank_d__Bacteria	p__Firmicutes	c__Bacilli	o__RF39	f__norank_o__RF39	g__norank_f__norank_o__RF39	s__unclassified_g__norank_f__norank_o__RF39	ASV1773	0	0	0	0	0	0	0	0	0	0	0	0	0	0	0	0	0	0	0	0	14	0	0	0
d__Bacteria	k__norank_d__Bacteria	p__Firmicutes	c__Clostridia	o__Lachnospirales	f__Lachnospiraceae	g__unclassified_f__Lachnospiraceae	s__unclassified_f__Lachnospiraceae	ASV2006	0	5	0	6	0	0	0	0	0	0	0	0	3	0	0	0	0	0	0	0	0	0	0	0
d__Bacteria	k__norank_d__Bacteria	p__Firmicutes	c__Clostridia	o__Oscillospirales	f__Oscillospiraceae	g__unclassified_f__Oscillospiraceae	s__unclassified_f__Oscillospiraceae	ASV447	26	28	40	76	19	45	0	0	70	39	0	21	17	10	0	57	22	0	23	12	0	78	0	88
d__Bacteria	k__norank_d__Bacteria	p__Bacteroidota	c__Bacteroidia	o__Bacteroidales	f__Muribaculaceae	g__norank_f__Muribaculaceae	s__uncultured_bacterium_g__norank_f__Muribaculaceae	ASV2533	0	0	0	0	0	15	16	0	0	0	0	0	0	0	0	0	0	0	0	0	0	0	0	0
d__Bacteria	k__norank_d__Bacteria	p__Firmicutes	c__Clostridia	o__Lachnospirales	f__Lachnospiraceae	g__unclassified_f__Lachnospiraceae	s__unclassified_f__Lachnospiraceae	ASV2391	0	0	0	0	0	0	0	0	14	0	0	0	0	0	0	0	0	0	0	0	0	0	0	0
d__Bacteria	k__norank_d__Bacteria	p__Firmicutes	c__Clostridia	o__Lachnospirales	f__Lachnospiraceae	g__Lachnospiraceae_NK4A136_group	s__unclassified_g__Lachnospiraceae_NK4A136_group	ASV1046	0	0	0	0	0	0	215	0	0	0	251	0	138	89	0	39	113	647	0	0	17	0	59	0
d__Bacteria	k__norank_d__Bacteria	p__Bacteroidota	c__Bacteroidia	o__Bacteroidales	f__Muribaculaceae	g__norank_f__Muribaculaceae	s__uncultured_bacterium_g__norank_f__Muribaculaceae	ASV762	0	0	0	0	0	0	20	0	7	0	0	0	5	0	0	0	22	0	14	0	0	0	80	17
d__Bacteria	k__norank_d__Bacteria	p__Bacteroidota	c__Bacteroidia	o__Bacteroidales	f__Muribaculaceae	g__norank_f__Muribaculaceae	s__uncultured_bacterium_g__norank_f__Muribaculaceae	ASV761	43	38	37	13	20	0	0	18	14	74	24	0	12	15	17	51	23	34	37	10	11	0	0	18
d__Bacteria	k__norank_d__Bacteria	p__Firmicutes	c__Clostridia	o__Lachnospirales	f__Lachnospiraceae	g__unclassified_f__Lachnospiraceae	s__unclassified_f__Lachnospiraceae	ASV2397	0	0	0	0	0	0	0	0	11	0	0	0	0	0	0	0	0	0	0	0	0	0	0	0
d__Bacteria	k__norank_d__Bacteria	p__Bacteroidota	c__Bacteroidia	o__Bacteroidales	f__Muribaculaceae	g__norank_f__Muribaculaceae	s__unclassified_g__norank_f__Muribaculaceae	ASV770	0	0	0	0	0	37	0	0	0	0	0	0	0	0	0	0	0	27	0	0	0	0	0	18
d__Bacteria	k__norank_d__Bacteria	p__Firmicutes	c__Clostridia	o__Oscillospirales	f__Ruminococcaceae	g__unclassified_f__Ruminococcaceae	s__unclassified_f__Ruminococcaceae	ASV2024	0	0	0	2	0	0	6	3	0	0	0	0	0	0	2	0	0	0	0	0	0	0	0	0
d__Bacteria	k__norank_d__Bacteria	p__Bacteroidota	c__Bacteroidia	o__Bacteroidales	f__Muribaculaceae	g__norank_f__Muribaculaceae	s__uncultured_bacterium_g__norank_f__Muribaculaceae	ASV714	30	5	0	0	0	0	0	22	0	10	0	0	0	0	0	24	9	0	0	0	0	0	0	25
d__Bacteria	k__norank_d__Bacteria	p__Firmicutes	c__Clostridia	o__Lachnospirales	f__Lachnospiraceae	g__unclassified_f__Lachnospiraceae	s__unclassified_f__Lachnospiraceae	ASV1066	0	0	0	0	0	12	0	0	64	0	0	0	0	19	0	0	16	0	0	0	0	52	0	0
d__Bacteria	k__norank_d__Bacteria	p__Firmicutes	c__Clostridia	o__Clostridia_UCG-014	f__norank_o__Clostridia_UCG-014	g__norank_f__norank_o__Clostridia_UCG-014	s__unclassified_g__norank_f__norank_o__Clostridia_UCG-014	ASV2662	0	0	0	0	0	0	43	0	0	0	0	0	0	0	0	16	0	0	0	0	34	0	0	0
d__Bacteria	k__norank_d__Bacteria	p__Bacteroidota	c__Bacteroidia	o__Bacteroidales	f__Muribaculaceae	g__norank_f__Muribaculaceae	s__uncultured_bacterium_g__norank_f__Muribaculaceae	ASV2097	5	2	0	0	0	2	0	0	2	6	0	0	0	0	0	0	0	7	0	0	0	0	0	0
d__Bacteria	k__norank_d__Bacteria	p__Firmicutes	c__Clostridia	o__Clostridia_UCG-014	f__norank_o__Clostridia_UCG-014	g__norank_f__norank_o__Clostridia_UCG-014	s__unclassified_g__norank_f__norank_o__Clostridia_UCG-014	ASV2664	0	0	0	0	0	0	47	0	0	0	0	0	0	0	0	0	0	0	0	0	38	0	0	0
d__Bacteria	k__norank_d__Bacteria	p__Firmicutes	c__Bacilli	o__Erysipelotrichales	f__Erysipelotrichaceae	g__norank_f__Erysipelotrichaceae	s__uncultured_Allobaculum_sp._g__norank	ASV2826	0	0	0	0	0	0	0	0	0	0	0	0	0	0	33	0	0	0	0	0	0	0	0	0
d__Bacteria	k__norank_d__Bacteria	p__Firmicutes	c__Clostridia	o__Lachnospirales	f__Lachnospiraceae	g__Lachnospiraceae_UCG-006	s__uncultured_bacterium_g__Lachnospiraceae_UCG-006	ASV143	25	0	70	67	16	33	0	33	44	0	0	29	13	31	0	52	37	48	55	23	29	49	32	32
d__Bacteria	k__norank_d__Bacteria	p__Firmicutes	c__Bacilli	o__Erysipelotrichales	f__Erysipelotrichaceae	g__norank_f__Erysipelotrichaceae	s__uncultured_Allobaculum_sp._g__norank	ASV2820	0	0	0	0	0	0	0	0	0	0	0	0	0	0	89	0	0	0	0	0	0	0	0	0
d__Bacteria	k__norank_d__Bacteria	p__Firmicutes	c__Clostridia	o__Oscillospirales	f__Ruminococcaceae	g__Candidatus_Soleaferrea	s__uncultured_rumen_bacterium_g__Candidatus_Soleaferrea	ASV706	11	51	35	56	0	47	0	18	0	24	31	2	5	29	0	75	6	58	6	2	6	136	44	27
d__Bacteria	k__norank_d__Bacteria	p__Firmicutes	c__Bacilli	o__Erysipelotrichales	f__Erysipelotrichaceae	g__norank_f__Erysipelotrichaceae	s__uncultured_Allobaculum_sp._g__norank	ASV2829	0	0	0	0	0	0	0	0	0	0	0	0	0	0	19	0	0	0	0	0	0	0	0	0
d__Bacteria	k__norank_d__Bacteria	p__Firmicutes	c__Clostridia	o__Lachnospirales	f__Lachnospiraceae	g__Eubacterium_ruminantium_group	s__uncultured_bacterium_g__Eubacterium_ruminantium_group	ASV1613	0	0	0	0	0	0	0	0	159	0	295	0	0	0	0	0	0	0	0	0	0	58	0	0
d__Bacteria	k__norank_d__Bacteria	p__Firmicutes	c__Clostridia	o__Lachnospirales	f__Lachnospiraceae	g__unclassified_f__Lachnospiraceae	s__unclassified_f__Lachnospiraceae	ASV501	0	0	0	0	0	0	0	0	0	0	0	0	0	0	0	0	21	0	0	0	0	0	0	0
d__Bacteria	k__norank_d__Bacteria	p__Firmicutes	c__Clostridia	o__Oscillospirales	f__Ruminococcaceae	g__Ruminococcus	s__unclassified_g__Ruminococcus	ASV1167	0	0	0	0	25	9	103	0	0	0	0	0	112	0	91	0	0	0	0	0	0	0	0	0
d__Bacteria	k__norank_d__Bacteria	p__Firmicutes	c__Clostridia	o__Lachnospirales	f__Lachnospiraceae	g__unclassified_f__Lachnospiraceae	s__unclassified_f__Lachnospiraceae	ASV1188	0	0	0	44	17	0	120	0	0	0	0	0	75	0	0	0	46	0	0	0	0	0	0	0
d__Bacteria	k__norank_d__Bacteria	p__Firmicutes	c__Clostridia	o__Oscillospirales	f__Oscillospiraceae	g__NK4A214_group	s__unclassified_g__NK4A214_group	ASV1106	0	0	0	0	0	0	0	0	0	0	0	0	0	0	0	0	0	13	0	0	0	0	0	0
d__Bacteria	k__norank_d__Bacteria	p__Firmicutes	c__Clostridia	o__Lachnospirales	f__Lachnospiraceae	g__Lachnospiraceae_NK4A136_group	s__Lachnospiraceae_bacterium_COE1	ASV1816	0	0	0	0	0	21	0	0	0	0	0	0	0	0	0	0	0	0	0	0	0	44	0	0
d__Bacteria	k__norank_d__Bacteria	p__Bacteroidota	c__Bacteroidia	o__Bacteroidales	f__Muribaculaceae	g__norank_f__Muribaculaceae	s__uncultured_bacterium_g__norank_f__Muribaculaceae	ASV2384	0	0	0	0	0	0	0	0	16	0	0	39	0	0	8	3	0	0	0	0	0	0	0	0
d__Bacteria	k__norank_d__Bacteria	p__Firmicutes	c__Clostridia	o__Lachnospirales	f__Lachnospiraceae	g__unclassified_f__Lachnospiraceae	s__unclassified_f__Lachnospiraceae	ASV2833	19	0	0	0	0	0	0	0	0	0	0	0	0	0	14	0	0	0	0	0	0	0	0	0
d__Bacteria	k__norank_d__Bacteria	p__Firmicutes	c__Clostridia	o__Lachnospirales	f__Lachnospiraceae	g__unclassified_f__Lachnospiraceae	s__unclassified_f__Lachnospiraceae	ASV2832	0	0	0	0	0	0	0	0	0	0	0	0	0	0	12	0	0	0	0	0	0	0	0	0
d__Bacteria	k__norank_d__Bacteria	p__Firmicutes	c__Clostridia	o__Lachnospirales	f__Lachnospiraceae	g__unclassified_f__Lachnospiraceae	s__unclassified_f__Lachnospiraceae	ASV2837	0	0	0	0	0	0	0	0	0	0	0	0	0	0	8	0	0	0	0	0	0	0	0	0
d__Bacteria	k__norank_d__Bacteria	p__Firmicutes	c__Bacilli	o__RF39	f__norank_o__RF39	g__norank_f__norank_o__RF39	s__metagenome_g__norank_f__norank_o__RF39	ASV1890	0	0	0	0	0	0	0	0	4	0	0	0	0	0	0	0	0	0	0	0	0	8	0	0
d__Bacteria	k__norank_d__Bacteria	p__Firmicutes	c__Bacilli	o__Bacillales	f__Bacillaceae	g__Bacillus	s__Lactobacillus_vaginalis_g__Bacillus	ASV2515	0	0	0	0	0	62	0	0	0	0	0	0	0	0	0	0	0	0	0	0	0	0	0	0
d__Bacteria	k__norank_d__Bacteria	p__Bacteroidota	c__Bacteroidia	o__Bacteroidales	f__Prevotellaceae	g__Prevotellaceae_UCG-001	s__uncultured_bacterium_g__Prevotellaceae_UCG-001	ASV2266	0	0	0	0	0	0	0	0	0	0	0	0	7	9	0	0	0	0	0	0	0	0	0	0
d__Bacteria	k__norank_d__Bacteria	p__Firmicutes	c__Bacilli	o__unclassified_c__Bacilli	f__unclassified_c__Bacilli	g__unclassified_c__Bacilli	s__unclassified_c__Bacilli	ASV1846	0	0	0	0	0	0	0	0	0	0	0	20	0	0	0	0	0	0	0	21	0	21	19	0
d__Bacteria	k__norank_d__Bacteria	p__Firmicutes	c__Clostridia	o__Lachnospirales	f__Lachnospiraceae	g__A2	s__uncultured_bacterium_g__A2	ASV1887	0	0	0	0	0	0	0	0	0	0	0	0	0	0	0	0	0	0	0	0	0	8	0	0
d__Bacteria	k__norank_d__Bacteria	p__Firmicutes	c__Clostridia	o__Clostridia_UCG-014	f__norank_o__Clostridia_UCG-014	g__norank_f__norank_o__Clostridia_UCG-014	s__unclassified_g__norank_f__norank_o__Clostridia_UCG-014	ASV76	0	0	0	0	0	0	0	0	27	0	0	0	0	0	0	0	0	0	0	0	0	0	0	11
d__Bacteria	k__norank_d__Bacteria	p__Firmicutes	c__Clostridia	o__Oscillospirales	f__Ruminococcaceae	g__norank_f__Ruminococcaceae	s__unclassified_g__norank_f__Ruminococcaceae	ASV2895	0	20	0	0	0	0	0	0	0	0	0	0	0	0	0	0	0	0	0	0	0	0	0	0
d__Bacteria	k__norank_d__Bacteria	p__Firmicutes	c__Clostridia	o__Oscillospirales	f__Ruminococcaceae	g__norank_f__Ruminococcaceae	s__unclassified_g__norank_f__Ruminococcaceae	ASV1927	0	0	29	42	0	0	0	0	0	0	0	0	0	0	0	0	0	42	0	0	0	0	10	0
d__Bacteria	k__norank_d__Bacteria	p__Firmicutes	c__Clostridia	o__Clostridia_UCG-014	f__norank_o__Clostridia_UCG-014	g__norank_f__norank_o__Clostridia_UCG-014	s__unclassified_g__norank_f__norank_o__Clostridia_UCG-014	ASV2713	0	0	0	0	0	0	0	0	0	0	0	0	0	0	0	26	0	0	0	0	0	0	0	0
d__Bacteria	k__norank_d__Bacteria	p__Firmicutes	c__Clostridia	o__Clostridia_UCG-014	f__norank_o__Clostridia_UCG-014	g__norank_f__norank_o__Clostridia_UCG-014	s__unclassified_g__norank_f__norank_o__Clostridia_UCG-014	ASV2710	0	0	0	0	0	0	0	0	0	0	0	0	0	0	0	31	0	0	0	0	0	0	0	0
d__Bacteria	k__norank_d__Bacteria	p__Firmicutes	c__Clostridia	o__Clostridia_UCG-014	f__norank_o__Clostridia_UCG-014	g__norank_f__norank_o__Clostridia_UCG-014	s__unclassified_g__norank_f__norank_o__Clostridia_UCG-014	ASV2715	0	0	0	0	0	0	0	0	0	0	0	0	0	0	0	23	0	0	0	0	0	0	0	0
d__Bacteria	k__norank_d__Bacteria	p__Firmicutes	c__Clostridia	o__Clostridia_UCG-014	f__norank_o__Clostridia_UCG-014	g__norank_f__norank_o__Clostridia_UCG-014	s__unclassified_g__norank_f__norank_o__Clostridia_UCG-014	ASV2718	0	8	0	0	0	0	0	0	0	0	0	20	0	0	0	17	0	23	0	0	0	0	0	0
d__Bacteria	k__norank_d__Bacteria	p__Firmicutes	c__Clostridia	o__Clostridia_UCG-014	f__norank_o__Clostridia_UCG-014	g__norank_f__norank_o__Clostridia_UCG-014	s__unclassified_g__norank_f__norank_o__Clostridia_UCG-014	ASV2719	0	0	0	0	0	0	0	0	0	0	0	21	0	0	0	16	0	0	0	0	0	0	0	0
d__Bacteria	k__norank_d__Bacteria	p__Firmicutes	c__Clostridia	o__Christensenellales	f__Christensenellaceae	g__Christensenellaceae_R-7_group	s__unclassified_g__Christensenellaceae_R-7_group	ASV2737	0	0	0	0	0	0	0	0	0	0	0	0	0	0	0	5	0	0	0	0	0	0	0	0
d__Bacteria	k__norank_d__Bacteria	p__Firmicutes	c__Clostridia	o__Lachnospirales	f__Lachnospiraceae	g__unclassified_f__Lachnospiraceae	s__unclassified_f__Lachnospiraceae	ASV1707	0	0	0	0	0	11	0	4	0	0	0	0	0	0	0	0	0	0	0	0	0	0	0	0
d__Bacteria	k__norank_d__Bacteria	p__Firmicutes	c__Clostridia	o__Oscillospirales	f__Eubacterium_coprostanoligenes_group	g__norank_f__Eubacterium_coprostanoligenes_group	s__uncultured_Clostridium_sp._g__norank_f__Eubacterium_coprostanoligenes_group	ASV835	0	3	2	0	0	0	0	4	2	5	0	5	0	2	0	0	0	0	0	3	0	7	0	8
d__Bacteria	k__norank_d__Bacteria	p__Firmicutes	c__Clostridia	o__Lachnospirales	f__Lachnospiraceae	g__Marvinbryantia	s__unclassified_g__Marvinbryantia	ASV2508	0	0	0	0	0	0	0	0	0	0	1	0	0	0	0	0	0	0	0	0	0	0	0	0
d__Bacteria	k__norank_d__Bacteria	p__Firmicutes	c__Clostridia	o__Lachnospirales	f__Lachnospiraceae	g__Lachnospiraceae_NK4A136_group	s__unclassified_g__Lachnospiraceae_NK4A136_group	ASV2888	0	153	0	0	0	0	0	0	0	0	0	0	0	0	0	0	0	0	0	0	0	0	0	0
d__Bacteria	k__norank_d__Bacteria	p__Firmicutes	c__Clostridia	o__Lachnospirales	f__Lachnospiraceae	g__unclassified_f__Lachnospiraceae	s__unclassified_f__Lachnospiraceae	ASV1708	0	0	0	0	0	0	0	14	0	0	0	0	0	0	0	0	0	0	0	0	0	0	0	0
d__Bacteria	k__norank_d__Bacteria	p__Firmicutes	c__Clostridia	o__Clostridia_UCG-014	f__norank_o__Clostridia_UCG-014	g__norank_f__norank_o__Clostridia_UCG-014	s__unclassified_g__norank_f__norank_o__Clostridia_UCG-014	ASV1197	0	0	40	19	13	0	0	0	0	0	0	7	0	0	0	0	0	7	8	0	0	0	0	0
d__Bacteria	k__norank_d__Bacteria	p__Firmicutes	c__Bacilli	o__Lactobacillales	f__Lactobacillaceae	g__Lactobacillus	s__unclassified_g__Lactobacillus	ASV2202	0	0	0	0	0	0	0	0	0	0	0	0	0	0	0	0	0	0	0	20	0	0	0	0
d__Bacteria	k__norank_d__Bacteria	p__Firmicutes	c__Bacilli	o__Lactobacillales	f__Lactobacillaceae	g__Lactobacillus	s__unclassified_g__Lactobacillus	ASV1881	0	0	0	0	0	0	0	0	0	0	0	0	0	0	0	0	0	0	0	0	9	9	0	0
d__Bacteria	k__norank_d__Bacteria	p__Firmicutes	c__Bacilli	o__Lactobacillales	f__Lactobacillaceae	g__Lactobacillus	s__unclassified_g__Lactobacillus	ASV2755	0	0	0	0	0	0	0	39	0	0	0	0	0	0	0	0	0	0	0	0	0	0	0	0
d__Bacteria	k__norank_d__Bacteria	p__Bacteroidota	c__Bacteroidia	o__Bacteroidales	f__Muribaculaceae	g__norank_f__Muribaculaceae	s__uncultured_bacterium_g__norank_f__Muribaculaceae	ASV888	0	0	2	0	0	0	0	0	16	0	20	13	0	0	16	15	0	10	0	0	7	0	12	5
d__Bacteria	k__norank_d__Bacteria	p__Firmicutes	c__Bacilli	o__Lactobacillales	f__Lactobacillaceae	g__Lactobacillus	s__unclassified_g__Lactobacillus	ASV2196	0	0	0	0	0	0	0	0	0	0	0	0	0	0	0	0	0	0	0	27	0	0	0	0
d__Bacteria	k__norank_d__Bacteria	p__Bacteroidota	c__Bacteroidia	o__Bacteroidales	f__Muribaculaceae	g__norank_f__Muribaculaceae	s__uncultured_Bacteroidales_bacterium_g__norank_f__Muribaculaceae	ASV674	0	0	0	0	0	0	0	31	0	12	0	0	0	0	0	0	0	0	0	0	0	0	0	34
d__Bacteria	k__norank_d__Bacteria	p__Firmicutes	c__Bacilli	o__Erysipelotrichales	f__Erysipelotrichaceae	g__Turicibacter	s__uncultured_bacterium_g__Turicibacter	ASV404	0	0	0	0	0	0	0	0	0	0	18	22	0	0	0	60	0	13	0	0	0	0	0	0
d__Bacteria	k__norank_d__Bacteria	p__Firmicutes	c__Clostridia	o__Lachnospirales	f__Lachnospiraceae	g__Lachnospiraceae_UCG-001	s__uncultured_bacterium_g__Lachnospiraceae_UCG-001	ASV2095	0	48	0	0	0	0	0	0	0	5	0	0	0	0	0	0	45	0	0	0	0	0	0	0
d__Bacteria	k__norank_d__Bacteria	p__Desulfobacterota	c__Desulfovibrionia	o__Desulfovibrionales	f__Desulfovibrionaceae	g__Desulfovibrio	s__uncultured_bacterium_g__Desulfovibrio	ASV2389	0	0	0	0	0	0	0	0	17	0	0	0	0	0	0	31	0	0	0	0	0	0	0	0
d__Bacteria	k__norank_d__Bacteria	p__Desulfobacterota	c__Desulfovibrionia	o__Desulfovibrionales	f__Desulfovibrionaceae	g__Desulfovibrio	s__unclassified_g__Desulfovibrio	ASV2522	0	0	0	0	0	23	0	0	0	0	0	0	0	0	0	0	0	0	0	0	0	0	0	0
d__Bacteria	k__norank_d__Bacteria	p__Bacteroidota	c__Bacteroidia	o__Bacteroidales	f__Muribaculaceae	g__norank_f__Muribaculaceae	s__uncultured_bacterium_g__norank_f__Muribaculaceae	ASV1129	84	32	0	0	164	0	105	19	59	60	56	33	103	15	147	0	0	37	63	135	0	4	43	0
d__Bacteria	k__norank_d__Bacteria	p__Firmicutes	c__Bacilli	o__RF39	f__norank_o__RF39	g__norank_f__norank_o__RF39	s__unclassified_g__norank_f__norank_o__RF39	ASV1897	0	0	0	0	0	8	0	4	0	0	0	0	0	0	0	0	0	0	0	0	0	5	0	0
d__Bacteria	k__norank_d__Bacteria	p__Firmicutes	c__Clostridia	o__Oscillospirales	f__Ruminococcaceae	g__norank_f__Ruminococcaceae	s__unclassified_g__norank_f__Ruminococcaceae	ASV573	0	0	4	9	0	0	0	0	12	0	0	0	0	0	0	0	11	0	0	0	0	12	0	0
d__Bacteria	k__norank_d__Bacteria	p__Firmicutes	c__Clostridia	o__Clostridia_UCG-014	f__norank_o__Clostridia_UCG-014	g__norank_f__norank_o__Clostridia_UCG-014	s__unclassified_g__norank_f__norank_o__Clostridia_UCG-014	ASV1970	0	0	23	11	0	0	0	0	0	0	0	0	0	0	0	0	0	0	0	19	18	0	0	0
d__Bacteria	k__norank_d__Bacteria	p__Firmicutes	c__Clostridia	o__Lachnospirales	f__Lachnospiraceae	g__Lachnospiraceae_NK4A136_group	s__unclassified_g__Lachnospiraceae_NK4A136_group	ASV2670	0	0	0	0	0	0	0	0	0	0	0	0	0	0	0	0	0	0	0	0	17	0	0	0
d__Bacteria	k__norank_d__Bacteria	p__Bacteroidota	c__Bacteroidia	o__Bacteroidales	f__Muribaculaceae	g__norank_f__Muribaculaceae	s__uncultured_bacterium_g__norank_f__Muribaculaceae	ASV402	29	8	9	10	7	0	11	9	11	18	7	24	7	16	15	10	5	63	32	56	14	17	15	10
d__Bacteria	k__norank_d__Bacteria	p__Firmicutes	c__Bacilli	o__RF39	f__norank_o__RF39	g__norank_f__norank_o__RF39	s__unclassified_g__norank_f__norank_o__RF39	ASV1768	0	0	0	0	0	7	0	0	18	0	0	0	0	0	0	0	0	0	0	0	0	0	0	0
d__Bacteria	k__norank_d__Bacteria	p__Firmicutes	c__Clostridia	o__Lachnospirales	f__Lachnospiraceae	g__unclassified_f__Lachnospiraceae	s__unclassified_f__Lachnospiraceae	ASV3017	0	0	0	0	0	0	0	0	0	0	0	8	0	0	0	0	0	0	0	0	0	0	0	0
d__Bacteria	k__norank_d__Bacteria	p__Firmicutes	c__Clostridia	o__Lachnospirales	f__Lachnospiraceae	g__unclassified_f__Lachnospiraceae	s__unclassified_f__Lachnospiraceae	ASV2543	0	0	0	0	0	9	0	0	0	0	0	0	0	0	0	0	0	0	0	0	0	0	0	0
d__Bacteria	k__norank_d__Bacteria	p__Firmicutes	c__Clostridia	o__Lachnospirales	f__Lachnospiraceae	g__unclassified_f__Lachnospiraceae	s__unclassified_f__Lachnospiraceae	ASV2010	0	6	0	6	0	0	0	0	0	0	0	0	0	0	0	0	0	0	0	0	0	0	0	0
d__Bacteria	k__norank_d__Bacteria	p__Firmicutes	c__Clostridia	o__Lachnospirales	f__Lachnospiraceae	g__Lachnospiraceae_UCG-001	s__uncultured_bacterium_g__Lachnospiraceae_UCG-001	ASV2890	0	40	0	0	0	0	0	0	0	0	0	0	0	0	0	0	0	0	0	0	0	0	0	0
d__Bacteria	k__norank_d__Bacteria	p__Firmicutes	c__Clostridia	o__Lachnospirales	f__Lachnospiraceae	g__unclassified_f__Lachnospiraceae	s__unclassified_f__Lachnospiraceae	ASV2547	0	0	0	0	0	7	0	0	0	0	0	0	0	0	0	0	0	0	0	0	0	0	0	0
d__Bacteria	k__norank_d__Bacteria	p__Firmicutes	c__Clostridia	o__Lachnospirales	f__Lachnospiraceae	g__unclassified_f__Lachnospiraceae	s__unclassified_f__Lachnospiraceae	ASV2546	14	16	0	0	0	6	0	0	0	0	0	0	16	0	0	0	0	0	0	0	0	0	0	0
d__Bacteria	k__norank_d__Bacteria	p__Bacteroidota	c__Bacteroidia	o__Bacteroidales	f__Muribaculaceae	g__norank_f__Muribaculaceae	s__uncultured_bacterium_g__norank_f__Muribaculaceae	ASV793	28	12	18	9	0	0	0	9	37	16	0	9	0	0	37	18	7	11	10	13	17	0	18	13
d__Bacteria	k__norank_d__Bacteria	p__Bacteroidota	c__Bacteroidia	o__Bacteroidales	f__Muribaculaceae	g__norank_f__Muribaculaceae	s__uncultured_bacterium_g__norank_f__Muribaculaceae	ASV791	17	0	0	0	0	0	0	0	22	0	31	0	0	0	0	0	9	0	23	0	0	21	0	13
d__Bacteria	k__norank_d__Bacteria	p__Firmicutes	c__Bacilli	o__Lactobacillales	f__Lactobacillaceae	g__Lactobacillus	s__unclassified_g__Lactobacillus	ASV44	470	0	0	0	0	0	197	0	0	0	0	0	0	0	0	0	0	0	0	0	378	0	0	0
d__Bacteria	k__norank_d__Bacteria	p__Firmicutes	c__Clostridia	o__Lachnospirales	f__Lachnospiraceae	g__unclassified_f__Lachnospiraceae	s__unclassified_f__Lachnospiraceae	ASV2381	0	0	0	0	0	3	0	0	20	0	0	0	5	0	0	6	0	0	0	0	0	0	0	0
d__Bacteria	k__norank_d__Bacteria	p__Firmicutes	c__Clostridia	o__Lachnospirales	f__Lachnospiraceae	g__Lachnospiraceae_NK4A136_group	s__Trichinella_pseudospiralis	ASV2721	0	0	0	0	0	0	0	0	0	0	0	0	0	0	0	11	0	29	0	0	0	0	0	0
d__Bacteria	k__norank_d__Bacteria	p__Bacteroidota	c__Bacteroidia	o__Bacteroidales	f__Muribaculaceae	g__norank_f__Muribaculaceae	s__uncultured_bacterium_g__norank_f__Muribaculaceae	ASV2528	0	0	0	0	0	14	0	0	0	0	0	16	0	0	0	0	0	0	0	0	0	0	0	0
d__Bacteria	k__norank_d__Bacteria	p__Bacteroidota	c__Bacteroidia	o__Bacteroidales	f__Muribaculaceae	g__norank_f__Muribaculaceae	s__uncultured_bacterium_g__norank_f__Muribaculaceae	ASV2783	0	0	0	0	0	0	0	6	0	0	0	0	0	0	0	0	0	0	0	0	0	0	0	0
d__Bacteria	k__norank_d__Bacteria	p__Firmicutes	c__Clostridia	o__Oscillospirales	f__Oscillospiraceae	g__norank_f__Oscillospiraceae	s__uncultured_bacterium_g__norank_f__Oscillospiraceae	ASV2076	0	0	0	0	0	0	0	0	0	14	0	0	0	0	0	14	0	0	0	0	0	0	0	0
d__Bacteria	k__norank_d__Bacteria	p__Firmicutes	c__Clostridia	o__Oscillospirales	f__Ruminococcaceae	g__unclassified_f__Ruminococcaceae	s__unclassified_f__Ruminococcaceae	ASV1688	0	11	0	19	0	4	14	0	0	0	0	0	5	0	0	0	0	0	0	4	0	17	8	0
d__Bacteria	k__norank_d__Bacteria	p__Bacteroidota	c__Bacteroidia	o__Bacteroidales	f__Muribaculaceae	g__norank_f__Muribaculaceae	s__uncultured_bacterium_g__norank_f__Muribaculaceae	ASV1511	0	0	0	54	0	0	12	0	24	0	12	15	12	5	45	43	18	17	25	124	114	0	46	0
d__Bacteria	k__norank_d__Bacteria	p__Firmicutes	c__Clostridia	o__Lachnospirales	f__Lachnospiraceae	g__Lachnospiraceae_UCG-006	s__uncultured_bacterium_g__Lachnospiraceae_UCG-006	ASV2317	0	0	12	0	0	0	0	0	0	0	0	0	0	0	0	30	0	0	0	0	0	0	0	0
d__Bacteria	k__norank_d__Bacteria	p__Firmicutes	c__Bacilli	o__Bacillales	f__Bacillaceae	g__Bacillus	s__Lactobacillus_vaginalis_g__Bacillus	ASV2175	0	21	0	0	0	0	0	0	0	0	0	0	0	20	0	0	0	0	0	106	0	0	0	0
d__Bacteria	k__norank_d__Bacteria	p__Firmicutes	c__Clostridia	o__Oscillospirales	f__Oscillospiraceae	g__UCG-005	s__unclassified_g__UCG-005	ASV2465	0	0	0	0	0	0	0	0	0	0	14	0	0	0	0	0	0	0	0	0	0	0	0	0
d__Bacteria	k__norank_d__Bacteria	p__Desulfobacterota	c__Desulfovibrionia	o__Desulfovibrionales	f__Desulfovibrionaceae	g__Desulfovibrio	s__uncultured_bacterium_g__Desulfovibrio	ASV832	0	0	12	13	0	0	0	9	0	6	0	0	0	0	0	0	0	0	0	0	0	0	11	7
d__Bacteria	k__norank_d__Bacteria	p__Firmicutes	c__Bacilli	o__Bacillales	f__Bacillaceae	g__Bacillus	s__Lactobacillus_vaginalis_g__Bacillus	ASV18	0	115	116	91	219	0	138	52	80	233	89	229	204	53	129	105	162	0	37	44	161	205	46	107
d__Bacteria	k__norank_d__Bacteria	p__Bacteroidota	c__Bacteroidia	o__Bacteroidales	f__Muribaculaceae	g__norank_f__Muribaculaceae	s__unclassified_g__norank_f__Muribaculaceae	ASV640	27	73	91	105	40	33	25	28	38	75	10	0	48	13	48	67	36	33	49	110	57	54	20	51
d__Bacteria	k__norank_d__Bacteria	p__Firmicutes	c__Clostridia	o__Monoglobales	f__Monoglobaceae	g__Monoglobus	s__unclassified_g__Monoglobus	ASV1042	0	13	7	14	0	0	0	0	0	0	4	0	0	0	0	0	0	8	0	0	32	0	0	0
d__Bacteria	k__norank_d__Bacteria	p__Firmicutes	c__Bacilli	o__Lactobacillales	f__Lactobacillaceae	g__Lactobacillus	s__unclassified_g__Lactobacillus	ASV1505	0	0	0	0	0	0	0	0	0	0	0	0	119	61	0	0	105	0	24	0	0	0	0	0
d__Bacteria	k__norank_d__Bacteria	p__Bacteroidota	c__Bacteroidia	o__Bacteroidales	f__Muribaculaceae	g__norank_f__Muribaculaceae	s__uncultured_bacterium_g__norank_f__Muribaculaceae	ASV2417	0	0	0	0	0	0	0	0	5	0	0	0	0	0	0	0	0	0	0	0	0	0	0	0
d__Bacteria	k__norank_d__Bacteria	p__Firmicutes	c__Bacilli	o__Lactobacillales	f__Lactobacillaceae	g__Lactobacillus	s__unclassified_g__Lactobacillus	ASV1507	0	0	36	0	0	44	0	0	0	0	0	0	0	0	0	0	0	0	24	0	0	0	0	0
d__Bacteria	k__norank_d__Bacteria	p__Firmicutes	c__Bacilli	o__Lactobacillales	f__Lactobacillaceae	g__Lactobacillus	s__unclassified_g__Lactobacillus	ASV2966	0	0	0	0	0	0	0	0	0	0	0	0	0	0	0	0	169	0	0	0	0	0	0	0
d__Bacteria	k__norank_d__Bacteria	p__Bacteroidota	c__Bacteroidia	o__Bacteroidales	f__Muribaculaceae	g__norank_f__Muribaculaceae	s__uncultured_bacterium_g__norank_f__Muribaculaceae	ASV1474	0	0	0	0	0	11	0	0	0	0	0	0	0	0	0	0	0	0	47	0	0	0	0	0
d__Bacteria	k__norank_d__Bacteria	p__Bacteroidota	c__Bacteroidia	o__Bacteroidales	f__Muribaculaceae	g__norank_f__Muribaculaceae	s__uncultured_bacterium_g__norank_f__Muribaculaceae	ASV1479	0	0	0	0	0	0	0	0	0	0	0	0	0	0	0	0	0	0	36	0	0	0	0	0
d__Bacteria	k__norank_d__Bacteria	p__Bacteroidota	c__Bacteroidia	o__Bacteroidales	f__Muribaculaceae	g__norank_f__Muribaculaceae	s__uncultured_bacterium_g__norank_f__Muribaculaceae	ASV1478	12	0	0	0	0	33	0	0	104	10	63	7	0	92	0	124	0	0	39	0	0	46	18	0
d__Bacteria	k__norank_d__Bacteria	p__Firmicutes	c__Clostridia	o__Oscillospirales	f__Eubacterium_coprostanoligenes_group	g__norank_f__Eubacterium_coprostanoligenes_group	s__unclassified_g__norank_f__Eubacterium_coprostanoligenes_group	ASV2072	0	0	59	0	0	0	0	0	41	20	69	0	0	0	0	0	10	0	0	0	0	0	0	0
d__Bacteria	k__norank_d__Bacteria	p__Firmicutes	c__Clostridia	o__Oscillospirales	f__Ruminococcaceae	g__norank_f__Ruminococcaceae	s__unclassified_g__norank_f__Ruminococcaceae	ASV2415	0	0	0	0	0	0	0	0	3	0	0	0	0	0	0	1	0	0	0	0	0	0	2	0
d__Bacteria	k__norank_d__Bacteria	p__Desulfobacterota	c__Desulfovibrionia	o__Desulfovibrionales	f__Desulfovibrionaceae	g__Desulfovibrio	s__unclassified_g__Desulfovibrio	ASV820	0	14	0	0	0	13	0	0	0	0	0	0	0	0	0	0	0	0	0	0	0	0	17	11
d__Bacteria	k__norank_d__Bacteria	p__Firmicutes	c__Clostridia	o__Peptostreptococcales-Tissierellales	f__Anaerovoracaceae	g__Eubacterium_brachy_group	s__uncultured_bacterium_g__Eubacterium_brachy_group	ASV978	0	0	30	16	8	9	0	0	0	0	0	0	0	0	0	0	18	0	7	0	8	0	0	0
d__Bacteria	k__norank_d__Bacteria	p__Firmicutes	c__Clostridia	o__Oscillospirales	f__Ruminococcaceae	g__Ruminococcus	s__unclassified_g__Ruminococcus	ASV617	6	210	0	0	0	0	0	241	0	29	0	0	0	0	0	0	76	0	0	0	0	0	0	289
d__Bacteria	k__norank_d__Bacteria	p__Firmicutes	c__Clostridia	o__Lachnospirales	f__Lachnospiraceae	g__Lachnospiraceae_FCS020_group	s__unclassified_g__Lachnospiraceae_FCS020_group	ASV2421	0	0	0	0	0	4	8	0	4	0	0	0	0	0	0	0	0	0	0	0	0	0	0	0
d__Bacteria	k__norank_d__Bacteria	p__Firmicutes	c__Bacilli	o__Erysipelotrichales	f__Erysipelotrichaceae	g__Faecalibaculum	s__uncultured_bacterium_g__Faecalibaculum	ASV3041	33	0	0	0	0	0	0	0	0	0	0	0	0	0	0	0	0	0	0	0	0	0	0	0
d__Bacteria	k__norank_d__Bacteria	p__Campilobacterota	c__Campylobacteria	o__Campylobacterales	f__Helicobacteraceae	g__Helicobacter	s__unclassified_g__Helicobacter	ASV1994	0	0	7	8	0	0	0	0	0	0	0	6	0	0	0	2	0	0	0	0	6	0	0	0
d__Bacteria	k__norank_d__Bacteria	p__Firmicutes	c__Negativicutes	o__Veillonellales-Selenomonadales	f__Selenomonadaceae	g__Quinella	s__uncultured_bacterium_g__Quinella	ASV2129	0	0	0	0	0	0	0	0	0	0	0	52	0	0	0	0	0	0	0	0	0	0	0	0
d__Bacteria	k__norank_d__Bacteria	p__Firmicutes	c__Clostridia	o__Oscillospirales	f__Ruminococcaceae	g__Ruminococcus	s__unclassified_g__Ruminococcus	ASV2446	0	0	0	0	0	0	0	0	0	0	31	0	0	0	0	0	0	0	0	0	0	0	0	0
d__Bacteria	k__norank_d__Bacteria	p__Firmicutes	c__Clostridia	o__Lachnospirales	f__Lachnospiraceae	g__unclassified_f__Lachnospiraceae	s__unclassified_f__Lachnospiraceae	ASV2761	0	0	0	0	0	0	0	20	0	0	0	0	0	0	0	0	0	0	0	0	0	0	0	0
d__Bacteria	k__norank_d__Bacteria	p__Firmicutes	c__Clostridia	o__Clostridia_vadinBB60_group	f__norank_o__Clostridia_vadinBB60_group	g__norank_f__norank_o__Clostridia_vadinBB60_group	s__unclassified_g__norank_f__norank_o__Clostridia_vadinBB60_group	ASV2344	0	0	4	0	0	0	0	0	0	0	0	0	0	0	0	0	0	0	0	0	0	0	0	0
d__Bacteria	k__norank_d__Bacteria	p__Firmicutes	c__Clostridia	o__Oscillospirales	f__Ruminococcaceae	g__Ruminococcus	s__unclassified_g__Ruminococcus	ASV1830	38	0	3	0	0	0	0	0	0	0	0	0	0	0	0	0	0	0	0	0	0	29	13	0
d__Bacteria	k__norank_d__Bacteria	p__Firmicutes	c__Clostridia	o__Lachnospirales	f__Lachnospiraceae	g__unclassified_f__Lachnospiraceae	s__unclassified_f__Lachnospiraceae	ASV2767	0	0	0	0	0	0	0	15	0	0	0	0	0	0	0	0	0	0	0	0	0	0	0	0
d__Bacteria	k__norank_d__Bacteria	p__Firmicutes	c__Clostridia	o__Eubacteriales	f__Anaerofustaceae	g__Anaerofustis	s__uncultured_bacterium_g__Anaerofustis	ASV2851	0	0	0	0	0	0	0	0	0	0	0	0	0	0	1	0	0	0	0	0	0	0	0	0
d__Bacteria	k__norank_d__Bacteria	p__Firmicutes	c__Clostridia	o__Lachnospirales	f__Lachnospiraceae	g__unclassified_f__Lachnospiraceae	s__unclassified_f__Lachnospiraceae	ASV2768	0	0	0	0	0	0	0	9	0	0	0	0	0	0	0	0	0	0	0	0	0	0	0	0
d__Bacteria	k__norank_d__Bacteria	p__Firmicutes	c__Clostridia	o__Clostridia_UCG-014	f__norank_o__Clostridia_UCG-014	g__norank_f__norank_o__Clostridia_UCG-014	s__unidentified_rumen_bacterium_JW32	ASV1541	0	0	0	0	0	0	0	0	0	0	0	0	0	0	0	0	0	0	14	0	0	0	0	0
d__Bacteria	k__norank_d__Bacteria	p__Bacteroidota	c__Bacteroidia	o__Bacteroidales	f__Muribaculaceae	g__norank_f__Muribaculaceae	s__uncultured_Barnesiella_sp._g__norank	ASV2675	0	0	0	0	0	0	0	0	0	0	0	0	0	0	0	5	0	0	0	0	10	0	0	0
d__Bacteria	k__norank_d__Bacteria	p__Firmicutes	c__Clostridia	o__Clostridia_UCG-014	f__norank_o__Clostridia_UCG-014	g__norank_f__norank_o__Clostridia_UCG-014	s__unidentified_rumen_bacterium_JW32	ASV1549	0	0	0	0	0	0	0	0	0	0	0	0	0	0	0	0	0	0	14	0	0	0	0	0
d__Bacteria	k__norank_d__Bacteria	p__Firmicutes	c__Clostridia	o__Oscillospirales	f__unclassified_o__Oscillospirales	g__unclassified_o__Oscillospirales	s__unclassified_o__Oscillospirales	ASV611	0	0	0	0	0	10	0	0	0	0	0	3	0	9	0	12	0	0	2	0	0	19	13	0
d__Bacteria	k__norank_d__Bacteria	p__Firmicutes	c__Clostridia	o__Lachnospirales	f__Lachnospiraceae	g__unclassified_f__Lachnospiraceae	s__unclassified_f__Lachnospiraceae	ASV652	0	0	0	14	0	50	0	23	0	0	0	0	0	0	0	0	0	37	0	0	0	0	0	47
d__Bacteria	k__norank_d__Bacteria	p__Firmicutes	c__Clostridia	o__Lachnospirales	f__Lachnospiraceae	g__unclassified_f__Lachnospiraceae	s__unclassified_f__Lachnospiraceae	ASV2290	0	0	32	0	0	0	0	0	0	0	0	0	0	0	0	0	27	0	0	0	0	0	0	0
d__Bacteria	k__norank_d__Bacteria	p__Bacteroidota	c__Bacteroidia	o__Bacteroidales	f__Rikenellaceae	g__Alistipes	s__uncultured_bacterium_g__Alistipes	ASV1601	0	0	0	0	0	0	0	0	0	0	0	0	0	0	0	0	0	0	1	0	0	0	0	0
d__Bacteria	k__norank_d__Bacteria	p__Actinobacteriota	c__Coriobacteriia	o__Coriobacteriales	f__Eggerthellaceae	g__DNF00809	s__uncultured_bacterium_g__DNF00809	ASV904	0	0	0	0	0	0	0	0	0	0	0	0	0	0	0	0	0	0	0	0	0	0	0	3
d__Bacteria	k__norank_d__Bacteria	p__Bacteroidota	c__Bacteroidia	o__Bacteroidales	f__Rikenellaceae	g__Alistipes	s__uncultured_bacterium_g__Alistipes	ASV1604	0	0	0	0	0	1	0	0	3	0	0	0	0	0	0	0	0	4	2	0	0	0	4	0
d__Bacteria	k__norank_d__Bacteria	p__Actinobacteriota	c__Coriobacteriia	o__Coriobacteriales	f__Eggerthellaceae	g__Adlercreutzia	s__unclassified_g__Adlercreutzia	ASV1957	0	0	5	16	0	0	0	0	0	0	0	8	0	14	0	0	0	0	0	0	0	0	0	0
d__Bacteria	k__norank_d__Bacteria	p__Bacteroidota	c__Bacteroidia	o__Bacteroidales	f__Muribaculaceae	g__norank_f__Muribaculaceae	s__uncultured_bacterium_g__norank_f__Muribaculaceae	ASV1498	0	0	0	0	0	25	0	11	24	0	0	0	0	0	0	21	0	0	21	0	0	0	0	0
d__Bacteria	k__norank_d__Bacteria	p__Bacteroidota	c__Bacteroidia	o__Bacteroidales	f__Muribaculaceae	g__norank_f__Muribaculaceae	s__uncultured_bacterium_g__norank_f__Muribaculaceae	ASV1492	24	0	0	0	0	18	0	8	0	11	44	0	0	17	0	0	0	0	30	15	0	19	51	0
d__Bacteria	k__norank_d__Bacteria	p__Firmicutes	c__Bacilli	o__Bacillales	f__Bacillaceae	g__Bacillus	s__Lactobacillus_vaginalis_g__Bacillus	ASV2770	0	0	0	0	0	0	0	11	0	0	0	0	0	0	0	0	0	0	0	0	0	0	0	0
d__Bacteria	k__norank_d__Bacteria	p__Bacteroidota	c__Bacteroidia	o__Bacteroidales	f__Muribaculaceae	g__norank_f__Muribaculaceae	s__uncultured_bacterium_g__norank_f__Muribaculaceae	ASV1494	0	0	0	0	0	0	0	0	30	0	0	0	0	0	0	0	0	0	29	181	0	27	0	0
d__Bacteria	k__norank_d__Bacteria	p__Firmicutes	c__Clostridia	o__Oscillospirales	f__Oscillospiraceae	g__norank_f__Oscillospiraceae	s__unclassified_g__norank_f__Oscillospiraceae	ASV809	0	0	14	20	0	4	0	0	0	16	0	0	0	0	0	0	0	45	0	0	0	0	0	10
d__Bacteria	k__norank_d__Bacteria	p__Firmicutes	c__Clostridia	o__Oscillospirales	f__Oscillospiraceae	g__norank_f__Oscillospiraceae	s__unclassified_g__norank_f__Oscillospiraceae	ASV808	0	0	9	0	0	0	0	0	3	0	0	0	0	0	0	0	5	0	0	0	0	0	0	10
d__Bacteria	k__norank_d__Bacteria	p__Firmicutes	c__Clostridia	o__Lachnospirales	f__Lachnospiraceae	g__unclassified_f__Lachnospiraceae	s__unclassified_f__Lachnospiraceae	ASV3050	22	0	0	0	0	0	0	0	0	0	0	0	0	0	0	0	0	0	0	0	0	0	0	0
d__Bacteria	k__norank_d__Bacteria	p__Firmicutes	c__Clostridia	o__Oscillospirales	f__Ruminococcaceae	g__norank_f__Ruminococcaceae	s__Clostridium_sp._SN17	ASV2672	0	0	0	0	0	0	0	0	0	0	0	0	0	0	0	0	0	0	0	0	17	0	0	0
d__Bacteria	k__norank_d__Bacteria	p__Firmicutes	c__Clostridia	o__Clostridia_UCG-014	f__norank_o__Clostridia_UCG-014	g__norank_f__norank_o__Clostridia_UCG-014	s__uncultured_bacterium_g__norank_f__norank_o__Clostridia_UCG-014	ASV2838	0	0	0	0	0	0	0	0	0	0	0	0	0	0	8	0	0	0	0	0	0	0	0	0
d__Bacteria	k__norank_d__Bacteria	p__Firmicutes	c__Clostridia	o__Monoglobales	f__Monoglobaceae	g__Monoglobus	s__uncultured_bacterium_g__Monoglobus	ASV1230	0	0	2	0	1	0	4	0	0	0	8	0	0	0	0	0	2	0	0	0	0	0	0	0
d__Bacteria	k__norank_d__Bacteria	p__Firmicutes	c__Bacilli	o__Lactobacillales	f__Lactobacillaceae	g__Lactobacillus	s__unclassified_g__Lactobacillus	ASV2189	0	0	0	0	0	0	0	0	0	0	0	0	0	0	0	0	0	0	0	41	0	0	37	0
d__Bacteria	k__norank_d__Bacteria	p__Firmicutes	c__Clostridia	o__Clostridia_UCG-014	f__norank_o__Clostridia_UCG-014	g__norank_f__norank_o__Clostridia_UCG-014	s__unclassified_g__norank_f__norank_o__Clostridia_UCG-014	ASV2471	0	0	0	0	0	0	0	0	0	0	10	0	0	0	0	0	0	0	0	0	0	0	0	0
d__Bacteria	k__norank_d__Bacteria	p__Firmicutes	c__Clostridia	o__Clostridia_UCG-014	f__norank_o__Clostridia_UCG-014	g__norank_f__norank_o__Clostridia_UCG-014	s__unclassified_g__norank_f__norank_o__Clostridia_UCG-014	ASV2477	0	0	0	0	0	0	0	6	0	0	7	0	0	0	0	0	0	0	0	0	0	0	0	0
d__Bacteria	k__norank_d__Bacteria	p__Firmicutes	c__Clostridia	o__Oscillospirales	f__Ruminococcaceae	g__Candidatus_Soleaferrea	s__Ruminococcaceae_bacterium_GD6	ASV2511	0	0	0	0	0	0	0	0	0	0	1	0	0	0	0	0	0	0	0	0	0	0	0	0
d__Bacteria	k__norank_d__Bacteria	p__Actinobacteriota	c__Coriobacteriia	o__Coriobacteriales	f__Eggerthellaceae	g__Enterorhabdus	s__uncultured_bacterium_g__Enterorhabdus	ASV1982	7	13	0	9	0	0	0	0	0	0	0	0	12	0	0	0	10	0	0	0	0	0	0	0
d__Bacteria	k__norank_d__Bacteria	p__Firmicutes	c__Clostridia	o__Lachnospirales	f__Lachnospiraceae	g__unclassified_f__Lachnospiraceae	s__unclassified_f__Lachnospiraceae	ASV2057	0	0	0	0	0	0	0	0	0	34	0	0	0	0	0	0	0	0	0	0	0	0	0	0
d__Bacteria	k__norank_d__Bacteria	p__Firmicutes	c__Clostridia	o__Lachnospirales	f__Lachnospiraceae	g__Roseburia	s__unclassified_g__Roseburia	ASV1472	0	0	0	0	0	0	0	0	0	0	0	0	0	30	0	0	0	0	47	0	0	0	0	0
d__Bacteria	k__norank_d__Bacteria	p__Firmicutes	c__Clostridia	o__Clostridia_UCG-014	f__norank_o__Clostridia_UCG-014	g__norank_f__norank_o__Clostridia_UCG-014	s__unclassified_g__norank_f__norank_o__Clostridia_UCG-014	ASV121	30	0	40	27	13	0	0	0	0	11	21	0	0	0	13	20	0	24	0	0	0	0	0	0
d__Bacteria	k__norank_d__Bacteria	p__Firmicutes	c__Clostridia	o__Lachnospirales	f__Lachnospiraceae	g__Lachnospiraceae_NC2004_group	s__unclassified_g__Lachnospiraceae_NC2004_group	ASV1484	0	0	0	42	0	0	40	0	0	0	0	0	5	31	36	0	0	0	36	0	31	7	0	0
d__Bacteria	k__norank_d__Bacteria	p__Firmicutes	c__Clostridia	o__Lachnospirales	f__Lachnospiraceae	g__unclassified_f__Lachnospiraceae	s__unclassified_f__Lachnospiraceae	ASV855	0	0	7	0	0	0	13	12	0	0	0	0	0	0	0	19	0	0	0	22	0	0	0	7
d__Bacteria	k__norank_d__Bacteria	p__Firmicutes	c__Clostridia	o__Lachnospirales	f__Lachnospiraceae	g__GCA-900066575	s__uncultured_bacterium_g__GCA-900066575	ASV850	0	0	0	0	0	0	0	5	0	0	0	0	0	0	0	0	0	0	0	0	0	0	0	7
d__Bacteria	k__norank_d__Bacteria	p__Firmicutes	c__Clostridia	o__Clostridia_UCG-014	f__norank_o__Clostridia_UCG-014	g__norank_f__norank_o__Clostridia_UCG-014	s__uncultured_bacterium_g__norank_f__norank_o__Clostridia_UCG-014	ASV3014	0	0	0	0	0	0	0	0	0	0	0	11	0	0	0	0	0	0	0	0	0	0	0	0
d__Bacteria	k__norank_d__Bacteria	p__Firmicutes	c__Clostridia	o__Oscillospirales	f__Oscillospiraceae	g__unclassified_f__Oscillospiraceae	s__unclassified_f__Oscillospiraceae	ASV107	0	0	0	0	0	0	0	33	0	24	0	0	0	0	0	0	0	0	18	0	0	0	0	26
d__Bacteria	k__norank_d__Bacteria	p__Bacteroidota	c__Bacteroidia	o__Bacteroidales	f__Rikenellaceae	g__Alistipes	s__uncultured_bacterium_g__Alistipes	ASV220	10	14	78	96	18	23	7	41	27	18	0	5	0	0	13	11	22	13	29	14	74	10	0	16
d__Bacteria	k__norank_d__Bacteria	p__Bacteroidota	c__Bacteroidia	o__Bacteroidales	f__Muribaculaceae	g__norank_f__Muribaculaceae	s__unclassified_g__norank_f__Muribaculaceae	ASV1531	10	9	0	0	0	7	0	0	0	17	0	0	0	0	0	0	0	0	17	0	0	0	18	0
d__Bacteria	k__norank_d__Bacteria	p__Bacteroidota	c__Bacteroidia	o__Bacteroidales	f__Muribaculaceae	g__norank_f__Muribaculaceae	s__unclassified_g__norank_f__Muribaculaceae	ASV1534	0	1	0	0	0	0	0	0	0	0	27	0	0	10	13	4	0	10	17	0	0	0	0	0
d__Bacteria	k__norank_d__Bacteria	p__Firmicutes	c__Clostridia	o__Lachnospirales	f__Lachnospiraceae	g__unclassified_f__Lachnospiraceae	s__unclassified_f__Lachnospiraceae	ASV1894	0	0	0	0	0	0	0	0	0	0	0	0	0	0	0	0	0	0	0	0	0	6	0	0
d__Bacteria	k__norank_d__Bacteria	p__Firmicutes	c__Clostridia	o__Monoglobales	f__Monoglobaceae	g__Monoglobus	s__uncultured_bacterium_g__Monoglobus	ASV2836	0	0	0	0	0	0	0	0	0	0	0	0	0	0	10	0	0	0	0	0	0	0	0	0
d__Bacteria	k__norank_d__Bacteria	p__Bacteroidota	c__Bacteroidia	o__Bacteroidales	f__Muribaculaceae	g__norank_f__Muribaculaceae	s__uncultured_bacterium_g__norank_f__Muribaculaceae	ASV2061	0	0	11	0	0	30	28	41	0	30	0	0	0	0	0	33	0	0	0	0	0	0	0	0
d__Bacteria	k__norank_d__Bacteria	p__Bacteroidota	c__Bacteroidia	o__Bacteroidales	f__Muribaculaceae	g__norank_f__Muribaculaceae	s__uncultured_bacterium_g__norank_f__Muribaculaceae	ASV2067	0	0	0	0	0	0	0	0	0	20	0	7	0	0	0	0	0	0	0	0	0	0	0	0
d__Bacteria	k__norank_d__Bacteria	p__Bacteroidota	c__Bacteroidia	o__Bacteroidales	f__Muribaculaceae	g__norank_f__Muribaculaceae	s__uncultured_bacterium_g__norank_f__Muribaculaceae	ASV2065	42	0	0	0	0	0	0	0	10	22	13	0	0	0	0	0	0	0	0	0	0	0	24	0
d__Bacteria	k__norank_d__Bacteria	p__Firmicutes	c__Bacilli	o__RF39	f__norank_o__RF39	g__norank_f__norank_o__RF39	s__unclassified_g__norank_f__norank_o__RF39	ASV2335	0	0	6	0	0	0	0	0	0	0	0	0	0	0	0	0	0	0	0	0	0	0	0	0
d__Bacteria	k__norank_d__Bacteria	p__Firmicutes	c__Clostridia	o__Oscillospirales	f__Oscillospiraceae	g__unclassified_f__Oscillospiraceae	s__unclassified_f__Oscillospiraceae	ASV1935	0	0	0	32	0	0	0	0	0	0	0	0	0	0	38	0	0	0	0	17	0	0	0	0
d__Bacteria	k__norank_d__Bacteria	p__Firmicutes	c__Bacilli	o__Erysipelotrichales	f__Erysipelotrichaceae	g__Turicibacter	s__uncultured_bacterium_g__Turicibacter	ASV2	0	0	9	98	0	0	15	0	473	0	868	1164	6	10	4	798	0	252	71	0	78	0	540	0
d__Bacteria	k__norank_d__Bacteria	p__Bacteroidota	c__Bacteroidia	o__Bacteroidales	f__Rikenellaceae	g__Rikenellaceae_RC9_gut_group	s__uncultured_bacterium_g__Rikenellaceae_RC9_gut_group	ASV3064	4	0	0	0	0	0	0	0	0	0	0	0	0	0	0	0	0	0	0	0	0	0	0	0
d__Bacteria	k__norank_d__Bacteria	p__Bacteroidota	c__Bacteroidia	o__Bacteroidales	f__Muribaculaceae	g__norank_f__Muribaculaceae	s__uncultured_bacterium_g__norank_f__Muribaculaceae	ASV2268	0	0	0	0	0	0	0	0	0	0	0	14	0	7	0	0	0	0	0	0	0	0	0	0
d__Bacteria	k__norank_d__Bacteria	p__Firmicutes	c__Bacilli	o__RF39	f__norank_o__RF39	g__norank_f__norank_o__RF39	s__unclassified_g__norank_f__norank_o__RF39	ASV2849	0	0	0	0	0	0	0	0	0	0	0	0	0	0	2	0	0	0	0	0	0	0	0	0
d__Bacteria	k__norank_d__Bacteria	p__Firmicutes	c__Clostridia	o__Oscillospirales	f__Ruminococcaceae	g__Ruminococcus	s__unclassified_g__Ruminococcus	ASV1157	0	0	145	81	34	0	64	0	0	0	0	315	58	0	121	0	8	0	176	0	18	0	0	0
d__Bacteria	k__norank_d__Bacteria	p__Firmicutes	c__Clostridia	o__Oscillospirales	f__Oscillospiraceae	g__unclassified_f__Oscillospiraceae	s__unclassified_f__Oscillospiraceae	ASV746	0	0	0	0	0	0	0	0	0	0	0	0	0	0	0	0	0	0	32	0	0	0	0	20
d__Bacteria	k__norank_d__Bacteria	p__Firmicutes	c__Bacilli	o__Erysipelotrichales	f__Erysipelotrichaceae	g__norank_f__Erysipelotrichaceae	s__uncultured_bacterium_g__norank_f__Erysipelotrichaceae	ASV1917	82	0	7	139	0	0	0	0	0	0	52	0	0	0	0	77	0	42	0	0	14	0	23	0
d__Bacteria	k__norank_d__Bacteria	p__Bacteroidota	c__Bacteroidia	o__Bacteroidales	f__Rikenellaceae	g__Alistipes	s__unclassified_g__Alistipes	ASV2237	0	0	0	0	0	0	0	0	5	0	0	3	0	0	0	0	0	0	0	4	0	0	0	0
d__Bacteria	k__norank_d__Bacteria	p__Firmicutes	c__Clostridia	o__Oscillospirales	f__Ruminococcaceae	g__norank_f__Ruminococcaceae	s__unclassified_g__norank_f__Ruminococcaceae	ASV2081	0	0	0	0	0	0	0	0	0	12	0	0	0	0	0	0	0	0	0	0	0	0	0	0
d__Bacteria	k__norank_d__Bacteria	p__Firmicutes	c__Clostridia	o__Lachnospirales	f__Lachnospiraceae	g__unclassified_f__Lachnospiraceae	s__unclassified_f__Lachnospiraceae	ASV1939	0	0	43	25	0	18	0	0	0	0	20	0	0	0	0	0	24	36	0	0	0	0	0	0
d__Bacteria	k__norank_d__Bacteria	p__Firmicutes	c__Clostridia	o__Peptostreptococcales-Tissierellales	f__Anaerovoracaceae	g__Anaerovorax	s__unclassified_g__Anaerovorax	ASV546	0	0	7	0	0	0	0	0	0	0	0	0	4	6	0	0	6	0	0	0	0	3	0	0
d__Bacteria	k__norank_d__Bacteria	p__Actinobacteriota	c__Actinobacteria	o__Corynebacteriales	f__Corynebacteriaceae	g__Corynebacterium	s__unclassified_g__Corynebacterium	ASV2499	0	0	0	0	0	0	0	0	0	0	3	0	0	0	0	0	0	0	0	0	0	0	0	0
d__Bacteria	k__norank_d__Bacteria	p__Firmicutes	c__Clostridia	o__Lachnospirales	f__Lachnospiraceae	g__unclassified_f__Lachnospiraceae	s__unclassified_f__Lachnospiraceae	ASV1546	0	0	0	0	0	0	0	0	0	0	0	0	0	0	0	0	0	0	14	0	0	0	0	0
d__Bacteria	k__norank_d__Bacteria	p__Firmicutes	c__Clostridia	o__Oscillospirales	f__Oscillospiraceae	g__Oscillibacter	s__Clostridiales_bacterium_CIEAF_021	ASV695	0	15	0	13	0	0	13	34	12	8	0	0	0	0	0	0	21	0	0	0	0	24	0	25
d__Bacteria	k__norank_d__Bacteria	p__Firmicutes	c__Bacilli	o__RF39	f__norank_o__RF39	g__norank_f__norank_o__RF39	s__uncultured_bacterium_g__norank_f__norank_o__RF39	ASV2430	0	0	0	0	0	0	0	0	2	0	0	0	0	0	0	0	0	0	0	0	0	0	0	0
d__Bacteria	k__norank_d__Bacteria	p__Bacteroidota	c__Bacteroidia	o__Bacteroidales	f__Muribaculaceae	g__norank_f__Muribaculaceae	s__unclassified_g__norank_f__Muribaculaceae	ASV794	56	14	33	22	56	0	71	24	0	0	84	75	30	53	66	38	0	35	13	0	0	24	10	14
d__Bacteria	k__norank_d__Bacteria	p__Firmicutes	c__Bacilli	o__RF39	f__norank_o__RF39	g__norank_f__norank_o__RF39	s__uncultured_bacterium_g__norank_f__norank_o__RF39	ASV2541	0	0	0	0	0	9	0	0	0	0	0	0	0	0	0	0	0	0	0	0	0	0	0	0
d__Bacteria	k__norank_d__Bacteria	p__Firmicutes	c__Bacilli	o__Mycoplasmatales	f__Mycoplasmataceae	g__Mycoplasma	s__unclassified_g__Mycoplasma	ASV1824	0	0	0	0	0	19	0	0	0	0	0	0	0	0	0	0	0	0	0	0	0	36	20	0
d__Bacteria	k__norank_d__Bacteria	p__Bacteroidota	c__Bacteroidia	o__Bacteroidales	f__Muribaculaceae	g__norank_f__Muribaculaceae	s__uncultured_bacterium_g__norank_f__Muribaculaceae	ASV2701	0	0	0	0	0	0	0	0	0	0	0	0	0	0	42	55	0	0	0	0	0	0	0	0
d__Bacteria	k__norank_d__Bacteria	p__Firmicutes	c__Clostridia	o__Lachnospirales	f__Lachnospiraceae	g__unclassified_f__Lachnospiraceae	s__unclassified_f__Lachnospiraceae	ASV1625	0	0	0	0	0	0	0	0	0	0	0	0	0	0	0	0	23	18	0	0	0	0	0	0
d__Bacteria	k__norank_d__Bacteria	p__Bacteroidota	c__Bacteroidia	o__Bacteroidales	f__Rikenellaceae	g__Alistipes	s__Alistipes_sp._cv1	ASV2037	0	2	0	2	0	0	0	0	0	0	0	0	0	0	0	0	0	0	0	0	3	0	0	0
d__Bacteria	k__norank_d__Bacteria	p__Firmicutes	c__Clostridia	o__Lachnospirales	f__Lachnospiraceae	g__unclassified_f__Lachnospiraceae	s__unclassified_f__Lachnospiraceae	ASV1620	0	0	0	0	0	0	0	0	0	0	0	0	0	0	0	0	0	52	0	0	0	0	0	0
d__Bacteria	k__norank_d__Bacteria	p__Firmicutes	c__Bacilli	o__RF39	f__norank_o__RF39	g__norank_f__norank_o__RF39	s__unclassified_g__norank_f__norank_o__RF39	ASV1231	0	0	0	0	2	0	0	0	0	0	0	0	0	0	2	0	0	0	0	0	0	0	0	0
d__Bacteria	k__norank_d__Bacteria	p__Campilobacterota	c__Campylobacteria	o__Campylobacterales	f__Helicobacteraceae	g__Helicobacter	s__unclassified_g__Helicobacter	ASV899	0	1	0	0	0	5	0	10	6	21	0	0	0	0	9	0	18	0	29	6	0	0	9	3
d__Bacteria	k__norank_d__Bacteria	p__Bacteroidota	c__Bacteroidia	o__Bacteroidales	f__Muribaculaceae	g__norank_f__Muribaculaceae	s__unclassified_g__norank_f__Muribaculaceae	ASV2049	0	0	0	0	0	0	0	0	0	63	29	0	0	0	0	0	0	7	0	0	0	0	0	0
d__Bacteria	k__norank_d__Bacteria	p__Bacteroidota	c__Bacteroidia	o__Bacteroidales	f__Prevotellaceae	g__Alloprevotella	s__uncultured_bacterium_g__Alloprevotella	ASV865	232	0	0	0	0	4	0	3	14	13	0	4	18	10	91	0	0	0	34	67	0	11	3	4
d__Bacteria	k__norank_d__Bacteria	p__Bacteroidota	c__Bacteroidia	o__Bacteroidales	f__Muribaculaceae	g__norank_f__Muribaculaceae	s__uncultured_bacterium_g__norank_f__Muribaculaceae	ASV2679	0	0	0	0	0	0	0	0	0	0	0	0	13	0	0	0	19	0	0	0	12	0	0	0
d__Bacteria	k__norank_d__Bacteria	p__Firmicutes	c__Clostridia	o__unclassified_c__Clostridia	f__unclassified_c__Clostridia	g__unclassified_c__Clostridia	s__unclassified_c__Clostridia	ASV2396	0	0	0	0	0	0	0	0	7	0	0	0	0	0	0	0	0	0	0	0	0	0	0	0
d__Bacteria	k__norank_d__Bacteria	p__Firmicutes	c__Clostridia	o__Oscillospirales	f__Oscillospiraceae	g__norank_f__Oscillospiraceae	s__unclassified_g__norank_f__Oscillospiraceae	ASV1933	0	0	51	33	0	0	0	0	0	0	0	0	29	0	0	0	0	34	0	0	0	0	31	0
d__Bacteria	k__norank_d__Bacteria	p__Firmicutes	c__Clostridia	o__Oscillospirales	f__Ruminococcaceae	g__UBA1819	s__uncultured_bacterium_g__UBA1819	ASV3088	0	0	0	0	0	0	7	0	0	0	0	0	0	0	0	0	0	0	0	0	0	0	0	0
d__Bacteria	k__norank_d__Bacteria	p__Bacteroidota	c__Bacteroidia	o__Bacteroidales	f__Muribaculaceae	g__norank_f__Muribaculaceae	s__unclassified_g__norank_f__Muribaculaceae	ASV2445	0	0	0	0	0	0	0	0	0	0	31	26	0	0	0	38	0	6	0	0	0	0	0	0
d__Bacteria	k__norank_d__Bacteria	p__Firmicutes	c__Clostridia	o__Oscillospirales	f__UCG-010	g__norank_f__UCG-010	s__uncultured_bacterium_g__norank_f__UCG-010	ASV2003	7	1	4	7	0	5	0	0	6	0	0	0	1	0	0	0	0	0	0	0	0	0	0	0
d__Bacteria	k__norank_d__Bacteria	p__Bacteroidota	c__Bacteroidia	o__Bacteroidales	f__Muribaculaceae	g__norank_f__Muribaculaceae	s__unclassified_g__norank_f__Muribaculaceae	ASV2191	0	0	0	0	0	0	0	0	0	0	61	47	0	0	0	0	0	0	0	38	0	0	0	0
d__Bacteria	k__norank_d__Bacteria	p__Bacteroidota	c__Bacteroidia	o__Bacteroidales	f__Muribaculaceae	g__norank_f__Muribaculaceae	s__unclassified_g__norank_f__Muribaculaceae	ASV2190	0	0	0	0	0	0	0	0	0	0	0	0	0	0	0	0	0	0	0	41	0	0	0	0
d__Bacteria	k__norank_d__Bacteria	p__Firmicutes	c__Clostridia	o__Oscillospirales	f__Ruminococcaceae	g__norank_f__Ruminococcaceae	s__unclassified_g__norank_f__Ruminococcaceae	ASV768	0	0	0	0	0	0	20	0	0	0	0	0	0	8	7	0	12	0	0	0	16	0	0	13
d__Bacteria	k__norank_d__Bacteria	p__Firmicutes	c__Clostridia	o__Lachnospirales	f__Lachnospiraceae	g__unclassified_f__Lachnospiraceae	s__unclassified_f__Lachnospiraceae	ASV2717	0	0	0	0	0	0	0	0	0	0	0	0	0	0	0	19	0	0	0	0	0	0	0	0
d__Bacteria	k__norank_d__Bacteria	p__Firmicutes	c__Clostridia	o__Oscillospirales	f__Ruminococcaceae	g__norank_f__Ruminococcaceae	s__unclassified_g__norank_f__Ruminococcaceae	ASV765	0	0	0	11	0	0	0	11	0	0	7	0	7	3	0	9	0	0	0	0	13	0	0	14
d__Bacteria	k__norank_d__Bacteria	p__Firmicutes	c__Clostridia	o__Oscillospirales	f__Ruminococcaceae	g__norank_f__Ruminococcaceae	s__unclassified_g__norank_f__Ruminococcaceae	ASV2536	0	0	0	0	0	12	0	0	0	0	0	0	0	0	0	0	0	0	0	0	0	0	0	0
d__Bacteria	k__norank_d__Bacteria	p__Firmicutes	c__Clostridia	o__Lachnospirales	f__Lachnospiraceae	g__unclassified_f__Lachnospiraceae	s__unclassified_f__Lachnospiraceae	ASV887	0	5	11	8	0	0	0	0	0	0	3	0	0	0	0	0	0	0	0	0	2	2	0	4
d__Bacteria	k__norank_d__Bacteria	p__Firmicutes	c__Clostridia	o__Oscillospirales	f__Ruminococcaceae	g__norank_f__Ruminococcaceae	s__Ruminococcus_sp._YE281	ASV1138	0	0	0	0	56	0	450	0	0	0	0	0	0	0	0	0	217	0	0	0	0	0	0	0
d__Bacteria	k__norank_d__Bacteria	p__Firmicutes	c__Clostridia	o__Lachnospirales	f__Lachnospiraceae	g__unclassified_f__Lachnospiraceae	s__unclassified_f__Lachnospiraceae	ASV661	0	37	0	16	0	0	10	35	17	0	0	0	0	0	0	0	0	0	0	0	0	0	0	35
d__Bacteria	k__norank_d__Bacteria	p__Firmicutes	c__Clostridia	o__Oscillospirales	f__Ruminococcaceae	g__Ruminococcus	s__unclassified_g__Ruminococcus	ASV132	0	0	53	29	0	52	61	0	0	0	0	0	0	24	0	0	0	0	0	24	94	32	24	0
d__Bacteria	k__norank_d__Bacteria	p__Firmicutes	c__Clostridia	o__Lachnospirales	f__Lachnospiraceae	g__unclassified_f__Lachnospiraceae	s__unclassified_f__Lachnospiraceae	ASV662	0	41	15	0	0	0	0	22	0	0	0	0	0	15	0	0	12	0	0	0	0	0	0	40
d__Bacteria	k__norank_d__Bacteria	p__Bacteroidota	c__Bacteroidia	o__Bacteroidales	f__Muribaculaceae	g__norank_f__Muribaculaceae	s__uncultured_bacterium_g__norank_f__Muribaculaceae	ASV1488	0	0	0	0	0	0	0	0	0	0	0	0	0	41	0	0	0	0	29	0	0	0	15	0
d__Bacteria	k__norank_d__Bacteria	p__Firmicutes	c__Clostridia	o__Lachnospirales	f__Lachnospiraceae	g__unclassified_f__Lachnospiraceae	s__unclassified_f__Lachnospiraceae	ASV3071	0	0	0	0	0	0	39	0	0	0	0	0	0	0	0	0	0	0	0	0	0	0	0	0
d__Bacteria	k__norank_d__Bacteria	p__Firmicutes	c__Clostridia	o__Lachnospirales	f__Lachnospiraceae	g__unclassified_f__Lachnospiraceae	s__unclassified_f__Lachnospiraceae	ASV2153	0	0	4	0	0	0	0	0	3	0	0	0	0	0	0	0	0	0	0	0	0	0	0	0
d__Bacteria	k__norank_d__Bacteria	p__Firmicutes	c__Clostridia	o__Clostridia_UCG-014	f__norank_o__Clostridia_UCG-014	g__norank_f__norank_o__Clostridia_UCG-014	s__unclassified_g__norank_f__norank_o__Clostridia_UCG-014	ASV2869	0	0	0	0	0	0	0	0	0	0	0	0	20	0	0	0	0	7	0	0	0	0	0	0
d__Bacteria	k__norank_d__Bacteria	p__Firmicutes	c__Clostridia	o__Oscillospirales	f__Oscillospiraceae	g__unclassified_f__Oscillospiraceae	s__unclassified_f__Oscillospiraceae	ASV3008	0	0	0	0	0	0	0	0	0	0	0	17	0	0	0	0	0	0	0	0	0	0	0	0
d__Bacteria	k__norank_d__Bacteria	p__Spirochaetota	c__Spirochaetia	o__Spirochaetales	f__Spirochaetaceae	g__Treponema	s__uncultured_bacterium_g__Treponema	ASV2422	0	0	0	0	0	0	0	0	4	0	0	0	0	0	0	0	0	0	0	0	0	0	0	0
d__Bacteria	k__norank_d__Bacteria	p__Patescibacteria	c__Saccharimonadia	o__Saccharimonadales	f__Saccharimonadaceae	g__Candidatus_Saccharimonas	s__uncultured_bacterium_g__Candidatus_Saccharimonas	ASV976	0	0	0	0	12	0	0	33	31	0	23	18	0	16	0	18	0	14	0	0	0	0	0	0
d__Bacteria	k__norank_d__Bacteria	p__Firmicutes	c__Clostridia	o__Clostridiales	f__Clostridiaceae	g__Clostridium_sensu_stricto_1	s__unclassified_g__Clostridium_sensu_stricto_1	ASV1245	0	0	0	0	0	0	0	0	0	0	0	0	0	0	0	6	0	0	0	0	0	0	0	0
d__Bacteria	k__norank_d__Bacteria	p__Firmicutes	c__Clostridia	o__Oscillospirales	f__Ruminococcaceae	g__Ruminococcus	s__unclassified_g__Ruminococcus	ASV2360	0	0	0	0	0	0	0	0	211	0	0	0	0	0	0	0	0	0	0	0	0	0	0	0
d__Bacteria	k__norank_d__Bacteria	p__Bacteroidota	c__Bacteroidia	o__Bacteroidales	f__Muribaculaceae	g__norank_f__Muribaculaceae	s__unclassified_g__norank_f__Muribaculaceae	ASV17	0	71	0	0	0	88	0	61	0	109	0	0	0	0	0	0	0	0	186	0	0	0	0	63
d__Bacteria	k__norank_d__Bacteria	p__Firmicutes	c__Clostridia	o__Lachnospirales	f__Lachnospiraceae	g__Lachnospiraceae_UCG-001	s__uncultured_bacterium_g__Lachnospiraceae_UCG-001	ASV2860	0	0	0	0	0	0	0	0	0	0	0	0	0	0	0	0	0	24	0	0	0	0	0	0
d__Bacteria	k__norank_d__Bacteria	p__Firmicutes	c__Bacilli	o__Lactobacillales	f__Lactobacillaceae	g__Lactobacillus	s__unclassified_g__Lactobacillus	ASV723	79	18	14	0	28	35	27	11	32	13	16	55	26	54	36	17	16	0	9	51	32	41	37	21
d__Bacteria	k__norank_d__Bacteria	p__Bacteroidota	c__Bacteroidia	o__Bacteroidales	f__Muribaculaceae	g__norank_f__Muribaculaceae	s__unclassified_g__norank_f__Muribaculaceae	ASV94	23	40	0	0	0	0	46	28	0	0	0	0	0	0	53	13	44	0	0	67	0	22	0	0
d__Bacteria	k__norank_d__Bacteria	p__Firmicutes	c__Clostridia	o__Lachnospirales	f__Lachnospiraceae	g__unclassified_f__Lachnospiraceae	s__unclassified_f__Lachnospiraceae	ASV2534	0	0	0	0	0	14	30	0	0	0	0	0	0	0	0	0	0	0	0	0	0	0	0	0
d__Bacteria	k__norank_d__Bacteria	p__Firmicutes	c__Clostridia	o__Lachnospirales	f__Lachnospiraceae	g__unclassified_f__Lachnospiraceae	s__unclassified_f__Lachnospiraceae	ASV2537	0	0	0	0	0	12	0	0	0	0	0	0	0	0	0	0	0	0	0	0	14	0	0	0
d__Bacteria	k__norank_d__Bacteria	p__Firmicutes	c__Clostridia	o__Lachnospirales	f__Lachnospiraceae	g__unclassified_f__Lachnospiraceae	s__unclassified_f__Lachnospiraceae	ASV2531	0	0	0	0	0	12	0	0	0	0	0	0	0	0	0	0	0	0	0	0	0	0	5	0
d__Bacteria	k__norank_d__Bacteria	p__Bacteroidota	c__Bacteroidia	o__Bacteroidales	f__Muribaculaceae	g__Muribaculum	s__unclassified_g__Muribaculum	ASV1896	9	0	0	4	0	13	8	0	6	0	5	0	0	0	5	39	0	0	0	0	0	5	0	0
d__Bacteria	k__norank_d__Bacteria	p__Bacteroidota	c__Bacteroidia	o__Bacteroidales	f__Muribaculaceae	g__norank_f__Muribaculaceae	s__uncultured_bacterium_g__norank_f__Muribaculaceae	ASV781	6	24	0	0	10	4	0	36	0	12	44	19	11	0	106	24	22	12	49	0	4	0	3	13
d__Bacteria	k__norank_d__Bacteria	p__Firmicutes	c__Bacilli	o__Lactobacillales	f__Lactobacillaceae	g__Lactobacillus	s__unclassified_g__Lactobacillus	ASV53	0	0	0	0	0	0	0	0	0	0	0	0	0	0	0	0	0	0	0	0	0	0	0	13
d__Bacteria	k__norank_d__Bacteria	p__Bacteroidota	c__Bacteroidia	o__Bacteroidales	f__Muribaculaceae	g__norank_f__Muribaculaceae	s__uncultured_bacterium_g__norank_f__Muribaculaceae	ASV783	216	73	0	9	63	6	126	58	29	80	169	52	93	0	564	20	131	330	298	0	201	24	277	12
d__Bacteria	k__norank_d__Bacteria	p__Firmicutes	c__Bacilli	o__Lactobacillales	f__Lactobacillaceae	g__Lactobacillus	s__unclassified_g__Lactobacillus	ASV51	0	55	0	0	0	0	0	47	0	0	36	0	0	0	0	0	0	0	0	0	0	0	0	0
d__Bacteria	k__norank_d__Bacteria	p__Bacteroidota	c__Bacteroidia	o__Bacteroidales	f__Muribaculaceae	g__norank_f__Muribaculaceae	s__uncultured_bacterium_g__norank_f__Muribaculaceae	ASV787	0	0	0	38	0	0	0	5	0	0	0	0	0	0	0	0	8	0	8	0	22	0	0	11
d__Bacteria	k__norank_d__Bacteria	p__Actinobacteriota	c__Coriobacteriia	o__Coriobacteriales	f__Atopobiaceae	g__Coriobacteriaceae_UCG-002	s__uncultured_bacterium_g__Coriobacteriaceae_UCG-002	ASV2390	0	0	0	0	0	0	0	0	15	0	10	0	0	0	0	0	0	0	0	0	0	0	6	0
d__Bacteria	k__norank_d__Bacteria	p__Bacteroidota	c__Bacteroidia	o__Bacteroidales	f__Muribaculaceae	g__norank_f__Muribaculaceae	s__uncultured_bacterium_g__norank_f__Muribaculaceae	ASV788	0	65	79	110	0	58	0	20	111	76	132	176	0	163	0	458	0	297	135	0	109	110	138	14
d__Bacteria	k__norank_d__Bacteria	p__Firmicutes	c__Bacilli	o__Lactobacillales	f__Lactobacillaceae	g__Lactobacillus	s__unclassified_g__Lactobacillus	ASV58	25	0	20	31	0	18	0	0	16	0	23	20	0	32	0	18	0	0	0	0	44	0	17	0
d__Bacteria	k__norank_d__Bacteria	p__Firmicutes	c__Clostridia	o__Peptostreptococcales-Tissierellales	f__Anaerovoracaceae	g__Anaerovorax	s__uncultured_bacterium_g__Anaerovorax	ASV870	5	2	0	0	0	7	0	4	2	0	0	0	0	0	0	0	0	12	0	2	7	7	8	5
d__Bacteria	k__norank_d__Bacteria	p__Firmicutes	c__Clostridia	o__Lachnospirales	f__Lachnospiraceae	g__unclassified_f__Lachnospiraceae	s__unclassified_f__Lachnospiraceae	ASV2847	0	0	0	0	0	0	0	0	0	0	0	0	0	0	4	0	0	0	0	0	0	0	0	0
d__Bacteria	k__norank_d__Bacteria	p__Firmicutes	c__Bacilli	o__Lactobacillales	f__Lactobacillaceae	g__Lactobacillus	s__unclassified_g__Lactobacillus	ASV1189	0	0	0	0	18	0	0	0	0	0	0	0	0	0	0	0	0	0	0	0	0	0	0	0
d__Bacteria	k__norank_d__Bacteria	p__Firmicutes	c__Clostridia	o__Lachnospirales	f__Lachnospiraceae	g__unclassified_f__Lachnospiraceae	s__unclassified_f__Lachnospiraceae	ASV2841	0	0	0	0	0	0	0	0	0	0	0	0	0	0	6	0	0	0	0	0	0	0	0	0
d__Bacteria	k__norank_d__Bacteria	p__Firmicutes	c__Clostridia	o__Lachnospirales	f__Lachnospiraceae	g__Eubacterium_xylanophilum_group	s__uncultured_bacterium_g__Eubacterium_xylanophilum_group	ASV2859	0	0	0	0	0	0	0	0	0	0	0	0	0	0	0	0	0	22	0	0	0	0	0	0
d__Bacteria	k__norank_d__Bacteria	p__Firmicutes	c__Clostridia	o__Lachnospirales	f__Lachnospiraceae	g__Lachnospiraceae_NK4A136_group	s__unclassified_g__Lachnospiraceae_NK4A136_group	ASV341	0	0	0	0	0	0	0	0	93	0	0	0	0	0	0	0	0	0	0	0	0	0	0	0
d__Bacteria	k__norank_d__Bacteria	p__Firmicutes	c__Clostridia	o__Oscillospirales	f__Oscillospiraceae	g__NK4A214_group	s__unclassified_g__NK4A214_group	ASV2489	0	0	0	0	0	0	0	0	0	0	5	0	0	0	0	0	0	0	0	0	0	0	0	0
d__Bacteria	k__norank_d__Bacteria	p__Firmicutes	c__Clostridia	o__Oscillospirales	f__Ruminococcaceae	g__norank_f__Ruminococcaceae	s__unclassified_g__norank_f__Ruminococcaceae	ASV2887	0	0	0	0	0	0	0	0	0	0	0	0	0	0	0	0	0	2	0	0	0	0	0	0
d__Bacteria	k__norank_d__Bacteria	p__Firmicutes	c__Clostridia	o__Monoglobales	f__Monoglobaceae	g__Monoglobus	s__unclassified_g__Monoglobus	ASV2898	0	16	0	0	0	0	0	0	0	0	0	0	0	0	0	0	0	0	0	0	0	0	0	0
d__Bacteria	k__norank_d__Bacteria	p__Firmicutes	c__Clostridia	o__Clostridia_UCG-014	f__norank_o__Clostridia_UCG-014	g__norank_f__norank_o__Clostridia_UCG-014	s__unclassified_g__norank_f__norank_o__Clostridia_UCG-014	ASV2058	0	0	0	0	0	0	0	0	0	30	0	0	0	0	0	0	0	0	0	0	0	0	0	0
d__Bacteria	k__norank_d__Bacteria	p__Firmicutes	c__Clostridia	o__Lachnospirales	f__Lachnospiraceae	g__unclassified_f__Lachnospiraceae	s__unclassified_f__Lachnospiraceae	ASV242	0	0	0	0	0	0	33	36	0	0	0	14	0	0	0	16	0	0	0	0	0	0	0	0
d__Bacteria	k__norank_d__Bacteria	p__Firmicutes	c__Clostridia	o__Lachnospirales	f__Lachnospiraceae	g__ASF356	s__uncultured_bacterium_g__ASF356	ASV1741	0	0	0	0	0	0	0	0	0	0	0	0	0	0	0	0	0	0	0	0	0	0	6	0
d__Bacteria	k__norank_d__Bacteria	p__Proteobacteria	c__Gammaproteobacteria	o__Burkholderiales	f__Oxalobacteraceae	g__Oxalobacter	s__unclassified_g__Oxalobacter	ASV2351	0	0	2	0	0	0	0	0	0	0	0	0	0	0	0	0	0	0	0	0	7	0	0	0
d__Bacteria	k__norank_d__Bacteria	p__Bacteroidota	c__Bacteroidia	o__Bacteroidales	f__Muribaculaceae	g__norank_f__Muribaculaceae	s__uncultured_bacterium_g__norank_f__Muribaculaceae	ASV1465	0	0	0	0	0	0	0	0	0	0	0	44	16	0	0	126	0	0	63	0	0	0	45	0
d__Bacteria	k__norank_d__Bacteria	p__Bacteroidota	c__Bacteroidia	o__Bacteroidales	f__Muribaculaceae	g__norank_f__Muribaculaceae	s__uncultured_bacterium_g__norank_f__Muribaculaceae	ASV1460	62	0	0	30	0	68	0	0	0	0	0	7	0	0	0	22	0	104	65	213	0	28	0	0
d__Bacteria	k__norank_d__Bacteria	p__Firmicutes	c__Bacilli	o__Erysipelotrichales	f__Erysipelotrichaceae	g__norank_f__Erysipelotrichaceae	s__uncultured_Allobaculum_sp._g__norank	ASV1944	0	0	0	23	0	0	0	0	0	0	22	47	0	0	0	0	0	0	0	0	0	0	0	0
d__Bacteria	k__norank_d__Bacteria	p__Firmicutes	c__Bacilli	o__Lactobacillales	f__Enterococcaceae	g__Enterococcus	s__unclassified_g__Enterococcus	ASV583	0	0	0	0	0	0	0	0	0	0	0	14	0	0	0	0	0	0	0	0	0	0	0	0
d__Bacteria	k__norank_d__Bacteria	p__Firmicutes	c__Clostridia	o__Clostridia_UCG-014	f__norank_o__Clostridia_UCG-014	g__norank_f__norank_o__Clostridia_UCG-014	s__unclassified_g__norank_f__norank_o__Clostridia_UCG-014	ASV1566	0	0	0	0	0	0	0	0	0	0	0	0	0	0	0	0	0	0	8	0	0	0	0	0
d__Bacteria	k__norank_d__Bacteria	p__Firmicutes	c__Clostridia	o__Clostridia_UCG-014	f__norank_o__Clostridia_UCG-014	g__norank_f__norank_o__Clostridia_UCG-014	s__unclassified_g__norank_f__norank_o__Clostridia_UCG-014	ASV2187	0	0	5	0	0	0	0	0	0	0	0	0	0	0	0	0	0	0	0	38	0	0	0	0
d__Bacteria	k__norank_d__Bacteria	p__Bacteroidota	c__Bacteroidia	o__Bacteroidales	f__Muribaculaceae	g__norank_f__Muribaculaceae	s__unclassified_g__norank_f__Muribaculaceae	ASV694	43	53	26	13	74	64	60	28	0	0	0	0	0	0	11	0	0	0	49	0	19	34	0	27
d__Bacteria	k__norank_d__Bacteria	p__Firmicutes	c__Clostridia	o__Oscillospirales	f__Ruminococcaceae	g__Fournierella	s__unclassified_g__Fournierella	ASV2539	0	0	0	0	0	7	0	0	0	0	0	0	0	0	0	8	0	0	0	0	0	0	6	0
d__Bacteria	k__norank_d__Bacteria	p__Firmicutes	c__Clostridia	o__Clostridia_UCG-014	f__norank_o__Clostridia_UCG-014	g__norank_f__norank_o__Clostridia_UCG-014	s__unclassified_g__norank_f__norank_o__Clostridia_UCG-014	ASV1775	0	0	0	0	0	0	0	0	0	0	0	0	0	0	0	0	0	10	0	0	0	0	0	0
d__Bacteria	k__norank_d__Bacteria	p__Bacteroidota	c__Bacteroidia	o__Bacteroidales	f__Prevotellaceae	g__unclassified_f__Prevotellaceae	s__unclassified_f__Prevotellaceae	ASV2501	0	0	0	0	0	0	0	0	0	0	3	26	0	0	0	0	0	0	0	0	10	0	24	0
d__Bacteria	k__norank_d__Bacteria	p__Firmicutes	c__Bacilli	o__Lactobacillales	f__Lactobacillaceae	g__Lactobacillus	s__unclassified_g__Lactobacillus	ASV1	1834	3456	832	1773	5685	3068	2353	3127	2545	3325	2324	2606	4669	2673	2386	1783	3716	437	1128	1896	2323	1693	2713	3056
d__Bacteria	k__norank_d__Bacteria	p__Bacteroidota	c__Bacteroidia	o__Bacteroidales	f__Muribaculaceae	g__norank_f__Muribaculaceae	s__unclassified_g__norank_f__Muribaculaceae	ASV2056	0	29	0	0	0	0	0	28	25	41	9	33	0	0	5	0	0	0	0	7	0	0	0	0
d__Bacteria	k__norank_d__Bacteria	p__Bacteroidota	c__Bacteroidia	o__Bacteroidales	f__Muribaculaceae	g__norank_f__Muribaculaceae	s__unclassified_g__norank_f__Muribaculaceae	ASV2052	0	0	0	0	0	70	0	0	0	50	0	0	0	0	51	0	0	0	0	0	0	0	0	0
d__Bacteria	k__norank_d__Bacteria	p__Firmicutes	c__Bacilli	o__Lactobacillales	f__Lactobacillaceae	g__Lactobacillus	s__unclassified_g__Lactobacillus	ASV9	0	674	225	408	652	546	257	416	419	0	0	0	630	847	383	0	466	89	0	917	493	0	559	401
d__Bacteria	k__norank_d__Bacteria	p__Bacteroidota	c__Bacteroidia	o__Bacteroidales	f__Muribaculaceae	g__norank_f__Muribaculaceae	s__unclassified_g__norank_f__Muribaculaceae	ASV2050	0	0	0	0	0	0	0	0	0	53	0	0	0	0	0	0	0	0	0	0	0	0	0	0
d__Bacteria	k__norank_d__Bacteria	p__Firmicutes	c__Bacilli	o__Bacillales	f__Bacillaceae	g__Bacillus	s__Lactobacillus_vaginalis_g__Bacillus	ASV2392	0	0	0	0	0	0	0	0	19	0	0	0	0	0	0	0	0	0	0	0	0	0	0	0
d__Bacteria	k__norank_d__Bacteria	p__Firmicutes	c__Bacilli	o__Erysipelotrichales	f__Erysipelotrichaceae	g__Faecalibaculum	s__uncultured_bacterium_g__Faecalibaculum	ASV2254	0	0	0	0	0	0	0	0	0	0	0	0	0	25	0	0	0	0	0	0	0	0	0	0
d__Bacteria	k__norank_d__Bacteria	p__Bacteroidota	c__Bacteroidia	o__Bacteroidales	f__Muribaculaceae	g__norank_f__Muribaculaceae	s__unclassified_g__norank_f__Muribaculaceae	ASV2188	0	0	26	0	0	0	0	0	0	0	0	0	0	50	0	0	0	0	0	44	0	0	0	0
d__Bacteria	k__norank_d__Bacteria	p__Bacteroidota	c__Bacteroidia	o__Bacteroidales	f__Muribaculaceae	g__norank_f__Muribaculaceae	s__unclassified_g__norank_f__Muribaculaceae	ASV2185	0	0	0	0	0	0	0	0	0	0	0	0	0	0	0	0	0	0	0	43	0	0	0	0
d__Bacteria	k__norank_d__Bacteria	p__Bacteroidota	c__Bacteroidia	o__Bacteroidales	f__Muribaculaceae	g__norank_f__Muribaculaceae	s__unclassified_g__norank_f__Muribaculaceae	ASV2186	0	0	124	0	0	0	0	0	0	0	0	34	0	0	0	0	0	0	0	43	0	0	0	0
d__Bacteria	k__norank_d__Bacteria	p__Spirochaetota	c__Spirochaetia	o__Spirochaetales	f__Spirochaetaceae	g__Sphaerochaeta	s__uncultured_bacterium_g__Sphaerochaeta	ASV2994	0	0	0	0	0	0	0	0	0	0	0	0	0	0	0	0	2	0	0	0	0	0	0	0
d__Bacteria	k__norank_d__Bacteria	p__Firmicutes	c__Bacilli	o__RF39	f__norank_o__RF39	g__norank_f__norank_o__RF39	s__unclassified_g__norank_f__norank_o__RF39	ASV2239	0	0	0	0	0	0	0	0	1	0	0	0	0	0	0	0	0	0	0	3	0	0	0	0
d__Bacteria	k__norank_d__Bacteria	p__Bacteroidota	c__Bacteroidia	o__Bacteroidales	f__Muribaculaceae	g__norank_f__Muribaculaceae	s__unclassified_g__norank_f__Muribaculaceae	ASV2459	0	0	0	0	0	0	0	0	0	0	19	0	0	0	18	0	0	0	0	0	0	0	0	0
d__Bacteria	k__norank_d__Bacteria	p__Firmicutes	c__Bacilli	o__RF39	f__norank_o__RF39	g__norank_f__norank_o__RF39	s__unclassified_g__norank_f__norank_o__RF39	ASV2232	0	0	0	0	0	0	0	0	0	0	0	0	0	0	0	0	0	0	0	4	0	0	0	0
d__Bacteria	k__norank_d__Bacteria	p__Firmicutes	c__Bacilli	o__Lactobacillales	f__Lactobacillaceae	g__Lactobacillus	s__unclassified_g__Lactobacillus	ASV2739	0	0	0	0	0	0	0	0	0	0	0	0	0	0	0	6	0	0	0	0	0	0	0	0
d__Bacteria	k__norank_d__Bacteria	p__Firmicutes	c__Clostridia	o__Lachnospirales	f__Lachnospiraceae	g__Acetitomaculum	s__unclassified_g__Acetitomaculum	ASV1931	15	0	0	27	0	18	0	19	19	0	0	0	0	0	0	0	12	0	0	0	0	0	17	0
d__Bacteria	k__norank_d__Bacteria	p__Firmicutes	c__Clostridia	o__unclassified_c__Clostridia	f__unclassified_c__Clostridia	g__unclassified_c__Clostridia	s__unclassified_c__Clostridia	ASV2074	0	0	0	0	0	0	0	0	0	20	0	0	0	0	0	0	0	0	0	0	0	0	0	0
d__Bacteria	k__norank_d__Bacteria	p__Firmicutes	c__Clostridia	o__Oscillospirales	f__Oscillospiraceae	g__norank_f__Oscillospiraceae	s__unclassified_g__norank_f__Oscillospiraceae	ASV818	0	0	0	0	0	0	0	9	0	0	0	0	0	0	0	0	0	0	0	0	0	0	0	11
d__Bacteria	k__norank_d__Bacteria	p__Firmicutes	c__Clostridia	o__Lachnospirales	f__Lachnospiraceae	g__unclassified_f__Lachnospiraceae	s__unclassified_f__Lachnospiraceae	ASV1164	0	0	0	0	28	0	0	68	0	0	0	0	0	0	0	0	201	0	0	0	0	0	0	0
d__Bacteria	k__norank_d__Bacteria	p__Firmicutes	c__Clostridia	o__Lachnospirales	f__Lachnospiraceae	g__Lachnospiraceae_NK4A136_group	s__Clostridiales_bacterium_CIEAF_020	ASV2593	9	0	0	0	0	0	93	0	0	0	0	0	155	0	0	0	62	0	0	0	0	0	0	0
d__Bacteria	k__norank_d__Bacteria	p__Firmicutes	c__Clostridia	o__Oscillospirales	f__Oscillospiraceae	g__unclassified_f__Oscillospiraceae	s__unclassified_f__Oscillospiraceae	ASV2398	0	0	0	0	0	0	0	0	12	0	0	0	0	0	0	0	0	0	0	0	0	0	0	0
d__Bacteria	k__norank_d__Bacteria	p__Firmicutes	c__Clostridia	o__Oscillospirales	f__unclassified_o__Oscillospirales	g__unclassified_o__Oscillospirales	s__unclassified_o__Oscillospirales	ASV3070	1	0	0	0	0	0	0	0	0	0	0	0	0	0	0	0	0	0	0	0	0	0	0	0
d__Bacteria	k__norank_d__Bacteria	p__Firmicutes	c__Clostridia	o__Lachnospirales	f__Lachnospiraceae	g__Lachnospiraceae_UCG-001	s__uncultured_bacterium_g__Lachnospiraceae_UCG-001	ASV1061	0	0	0	0	0	0	0	0	0	0	0	0	0	0	0	3	0	0	0	7	0	0	0	0
d__Bacteria	k__norank_d__Bacteria	p__Firmicutes	c__Clostridia	o__unclassified_c__Clostridia	f__unclassified_c__Clostridia	g__unclassified_c__Clostridia	s__unclassified_c__Clostridia	ASV874	0	0	0	0	0	0	0	0	0	0	0	0	0	0	0	0	0	0	0	0	0	0	3	5
d__Bacteria	k__norank_d__Bacteria	p__Firmicutes	c__Clostridia	o__Oscillospirales	f__Oscillospiraceae	g__Oscillibacter	s__unclassified_g__Oscillibacter	ASV117	21	18	27	28	0	0	0	35	0	33	0	0	0	0	20	78	0	47	9	0	0	0	26	62
d__Bacteria	k__norank_d__Bacteria	p__Firmicutes	c__Bacilli	o__Erysipelotrichales	f__Erysipelotrichaceae	g__norank_f__Erysipelotrichaceae	s__uncultured_Allobaculum_sp._g__norank	ASV1843	0	0	0	0	0	0	0	0	0	0	0	0	0	0	0	0	0	0	0	0	0	22	0	0
d__Bacteria	k__norank_d__Bacteria	p__Firmicutes	c__Clostridia	o__Lachnospirales	f__Lachnospiraceae	g__unclassified_f__Lachnospiraceae	s__unclassified_f__Lachnospiraceae	ASV3058	12	0	0	0	0	0	0	0	0	0	0	0	0	0	0	0	0	0	0	0	0	0	0	0
d__Bacteria	k__norank_d__Bacteria	p__Firmicutes	c__Bacilli	o__RF39	f__norank_o__RF39	g__norank_f__norank_o__RF39	s__uncultured_bacterium_g__norank_f__norank_o__RF39	ASV1054	0	2	0	0	0	0	0	0	0	0	0	0	0	0	0	0	0	0	0	0	0	0	0	0
d__Bacteria	k__norank_d__Bacteria	p__Bacteroidota	c__Bacteroidia	o__Bacteroidales	f__Prevotellaceae	g__Prevotellaceae_Ga6A1_group	s__uncultured_bacterium_g__Prevotellaceae_Ga6A1_group	ASV902	5	0	0	0	0	0	0	2	0	0	0	0	0	3	4	0	0	0	3	0	0	0	0	3
d__Bacteria	k__norank_d__Bacteria	p__Firmicutes	c__Clostridia	o__Lachnospirales	f__Lachnospiraceae	g__unclassified_f__Lachnospiraceae	s__unclassified_f__Lachnospiraceae	ASV2447	0	0	0	0	0	0	0	0	0	0	29	0	0	0	0	0	0	10	0	0	0	0	0	0
d__Bacteria	k__norank_d__Bacteria	p__Firmicutes	c__Bacilli	o__Bacillales	f__Bacillaceae	g__Bacillus	s__Lactobacillus_vaginalis_g__Bacillus	ASV2178	0	0	0	0	0	0	0	0	0	0	0	0	0	0	0	0	0	0	0	77	0	0	0	0
d__Bacteria	k__norank_d__Bacteria	p__Bacteroidota	c__Bacteroidia	o__Bacteroidales	f__Muribaculaceae	g__norank_f__Muribaculaceae	s__unclassified_g__norank_f__Muribaculaceae	ASV659	46	49	84	40	36	46	31	24	30	119	0	38	0	44	0	68	50	0	0	50	105	88	56	41
d__Bacteria	k__norank_d__Bacteria	p__Bacteroidota	c__Bacteroidia	o__Bacteroidales	f__Muribaculaceae	g__norank_f__Muribaculaceae	s__unclassified_g__norank_f__Muribaculaceae	ASV656	29	45	0	30	22	59	66	41	42	81	32	0	0	34	18	76	53	13	90	0	0	62	0	41
d__Bacteria	k__norank_d__Bacteria	p__Bacteroidota	c__Bacteroidia	o__Bacteroidales	f__Muribaculaceae	g__norank_f__Muribaculaceae	s__unclassified_g__norank_f__Muribaculaceae	ASV655	25	46	68	38	51	66	34	24	54	92	26	0	38	0	105	0	43	92	60	42	27	28	59	47
d__Bacteria	k__norank_d__Bacteria	p__Bacteroidota	c__Bacteroidia	o__Bacteroidales	f__Muribaculaceae	g__norank_f__Muribaculaceae	s__unclassified_g__norank_f__Muribaculaceae	ASV653	0	64	0	0	35	0	47	39	0	0	0	0	229	5	240	0	84	0	8	27	0	0	0	52
d__Bacteria	k__norank_d__Bacteria	p__Bacteroidota	c__Bacteroidia	o__Bacteroidales	f__Muribaculaceae	g__norank_f__Muribaculaceae	s__uncultured_bacterium_g__norank_f__Muribaculaceae	ASV2462	0	0	0	0	0	0	0	0	0	0	13	0	0	0	0	0	0	0	0	0	0	0	0	0
d__Bacteria	k__norank_d__Bacteria	p__Firmicutes	c__Clostridia	o__Lachnospirales	f__Lachnospiraceae	g__Tyzzerella	s__unclassified_g__Tyzzerella	ASV1560	0	0	0	3	0	0	0	0	0	0	2	0	0	4	0	0	0	0	8	0	0	0	34	0
d__Bacteria	k__norank_d__Bacteria	p__Firmicutes	c__Clostridia	o__Clostridia_UCG-014	f__norank_o__Clostridia_UCG-014	g__norank_f__norank_o__Clostridia_UCG-014	s__unclassified_g__norank_f__norank_o__Clostridia_UCG-014	ASV1964	0	0	0	13	0	0	0	0	0	0	0	20	0	0	0	0	0	17	0	0	0	0	0	0
d__Bacteria	k__norank_d__Bacteria	p__Firmicutes	c__Clostridia	o__Oscillospirales	f__UCG-010	g__norank_f__UCG-010	s__unclassified_g__norank_f__UCG-010	ASV2274	0	0	0	0	0	0	5	0	8	0	13	0	0	6	13	0	3	0	0	0	4	0	0	0
d__Bacteria	k__norank_d__Bacteria	p__Firmicutes	c__Clostridia	o__Lachnospirales	f__Lachnospiraceae	g__unclassified_f__Lachnospiraceae	s__unclassified_f__Lachnospiraceae	ASV1948	0	0	0	19	0	0	0	0	0	0	0	17	0	0	0	0	0	0	0	0	19	0	0	0
d__Bacteria	k__norank_d__Bacteria	p__Proteobacteria	c__Gammaproteobacteria	o__Burkholderiales	f__Sutterellaceae	g__Parasutterella	s__uncultured_bacterium_g__Parasutterella	ASV1598	2	0	0	7	0	2	3	0	0	0	0	0	0	3	9	2	4	0	1	0	5	0	0	0
d__Bacteria	k__norank_d__Bacteria	p__Bacteroidota	c__Bacteroidia	o__Bacteroidales	f__Muribaculaceae	g__norank_f__Muribaculaceae	s__unclassified_g__norank_f__Muribaculaceae	ASV780	50	0	80	24	0	0	0	0	0	0	11	0	0	0	76	11	31	26	65	0	13	37	0	15
d__Bacteria	k__norank_d__Bacteria	p__Firmicutes	c__Clostridia	o__Lachnospirales	f__Lachnospiraceae	g__Acetitomaculum	s__Firmicutes_bacterium_CAG_194_44_15	ASV2014	0	12	0	5	0	0	0	0	0	0	0	0	0	7	4	0	0	0	0	0	0	0	0	0
d__Bacteria	k__norank_d__Bacteria	p__Firmicutes	c__Clostridia	o__Clostridia_UCG-014	f__norank_o__Clostridia_UCG-014	g__norank_f__norank_o__Clostridia_UCG-014	s__unclassified_g__norank_f__norank_o__Clostridia_UCG-014	ASV2990	0	0	0	0	0	0	0	0	0	0	0	0	0	0	0	0	3	0	0	0	0	0	0	0
d__Bacteria	k__norank_d__Bacteria	p__Firmicutes	c__Bacilli	o__RF39	f__norank_o__RF39	g__norank_f__norank_o__RF39	s__uncultured_bacterium_g__norank_f__norank_o__RF39	ASV2555	0	0	0	0	0	2	0	0	0	0	0	0	0	0	0	0	0	0	0	0	0	0	0	0
d__Bacteria	k__norank_d__Bacteria	p__Firmicutes	c__Clostridia	o__Lachnospirales	f__Lachnospiraceae	g__unclassified_f__Lachnospiraceae	s__unclassified_f__Lachnospiraceae	ASV1895	0	0	40	16	0	0	0	0	0	0	0	0	0	0	0	0	8	0	0	0	0	7	0	0
d__Bacteria	k__norank_d__Bacteria	p__Firmicutes	c__Bacilli	o__RF39	f__norank_o__RF39	g__norank_f__norank_o__RF39	s__uncultured_bacterium_g__norank_f__norank_o__RF39	ASV2880	0	0	0	0	0	0	0	0	0	0	0	0	0	0	0	0	0	5	0	0	0	0	0	0
d__Bacteria	k__norank_d__Bacteria	p__Firmicutes	c__Clostridia	o__Lachnospirales	f__Lachnospiraceae	g__unclassified_f__Lachnospiraceae	s__unclassified_f__Lachnospiraceae	ASV1891	0	0	0	0	0	0	13	0	0	23	0	0	0	0	0	0	0	0	0	0	4	7	0	0
d__Bacteria	k__norank_d__Bacteria	p__Firmicutes	c__Clostridia	o__Lachnospirales	f__Lachnospiraceae	g__unclassified_f__Lachnospiraceae	s__unclassified_f__Lachnospiraceae	ASV1543	0	0	0	0	0	0	0	0	0	0	0	0	0	0	0	0	0	0	12	0	0	0	0	0
d__Bacteria	k__norank_d__Bacteria	p__Firmicutes	c__Clostridia	o__Lachnospirales	f__Lachnospiraceae	g__unclassified_f__Lachnospiraceae	s__unclassified_f__Lachnospiraceae	ASV1545	0	0	0	0	0	0	0	0	0	0	0	0	0	0	0	0	0	0	12	0	0	0	0	0
d__Bacteria	k__norank_d__Bacteria	p__Firmicutes	c__Clostridia	o__Lachnospirales	f__Lachnospiraceae	g__unclassified_f__Lachnospiraceae	s__unclassified_f__Lachnospiraceae	ASV1898	0	0	0	0	0	0	9	13	34	5	0	0	21	0	0	0	0	0	0	0	0	6	0	0
d__Bacteria	k__norank_d__Bacteria	p__Bacteroidota	c__Bacteroidia	o__Bacteroidales	f__Muribaculaceae	g__norank_f__Muribaculaceae	s__uncultured_bacterium_g__norank_f__Muribaculaceae	ASV1869	0	0	0	0	0	0	0	0	0	0	6	0	0	0	0	0	0	0	0	0	0	14	0	0
d__Bacteria	k__norank_d__Bacteria	p__Firmicutes	c__Clostridia	o__Lachnospirales	f__Lachnospiraceae	g__Lachnospiraceae_NK4A136_group	s__unclassified_g__Lachnospiraceae_NK4A136_group	ASV2333	0	0	6	0	0	0	0	0	0	0	0	0	0	0	0	0	0	0	0	0	0	0	0	0
d__Bacteria	k__norank_d__Bacteria	p__Firmicutes	c__Clostridia	o__Oscillospirales	f__Oscillospiraceae	g__Colidextribacter	s__unclassified_g__Colidextribacter	ASV61	39	83	137	108	36	72	77	91	79	49	50	0	58	0	55	95	105	111	47	36	74	73	0	88
d__Bacteria	k__norank_d__Bacteria	p__Bacteroidota	c__Bacteroidia	o__Bacteroidales	f__Muribaculaceae	g__norank_f__Muribaculaceae	s__uncultured_bacterium_g__norank_f__Muribaculaceae	ASV1865	0	0	0	0	0	0	0	0	0	0	0	0	0	0	0	0	0	0	0	0	0	16	0	0
d__Bacteria	k__norank_d__Bacteria	p__Firmicutes	c__Clostridia	o__Lachnospirales	f__Lachnospiraceae	g__unclassified_f__Lachnospiraceae	s__unclassified_f__Lachnospiraceae	ASV709	25	36	44	40	15	19	27	27	20	0	23	7	24	16	0	19	45	25	47	16	22	31	19	24
d__Bacteria	k__norank_d__Bacteria	p__Bacteroidota	c__Bacteroidia	o__Bacteroidales	f__Muribaculaceae	g__norank_f__Muribaculaceae	s__uncultured_Barnesiella_sp._g__norank	ASV2973	0	0	0	0	0	0	23	0	0	0	0	0	0	0	0	0	25	0	0	0	0	0	0	0
d__Bacteria	k__norank_d__Bacteria	p__Firmicutes	c__Clostridia	o__Lachnospirales	f__Lachnospiraceae	g__unclassified_f__Lachnospiraceae	s__unclassified_f__Lachnospiraceae	ASV702	0	15	42	0	0	11	62	0	0	0	0	0	0	0	0	0	0	7	0	0	0	0	0	19
d__Bacteria	k__norank_d__Bacteria	p__Bacteroidota	c__Bacteroidia	o__Bacteroidales	f__Muribaculaceae	g__norank_f__Muribaculaceae	s__uncultured_bacterium_g__norank_f__Muribaculaceae	ASV2292	0	0	36	0	0	0	0	0	0	0	11	0	0	0	0	0	0	0	0	0	39	0	13	0
d__Bacteria	k__norank_d__Bacteria	p__Firmicutes	c__Bacilli	o__Erysipelotrichales	f__Erysipelotrichaceae	g__Allobaculum	s__uncultured_bacterium_g__Allobaculum	ASV2253	0	0	0	0	0	0	0	0	0	0	0	0	0	32	0	0	0	0	0	0	0	0	0	0
d__Bacteria	k__norank_d__Bacteria	p__Bacteroidota	c__Bacteroidia	o__Bacteroidales	f__Muribaculaceae	g__norank_f__Muribaculaceae	s__uncultured_bacterium_g__norank_f__Muribaculaceae	ASV2295	0	0	32	0	0	0	0	0	0	0	0	0	0	0	0	0	0	0	0	0	0	0	0	0
d__Bacteria	k__norank_d__Bacteria	p__Firmicutes	c__Clostridia	o__Lachnospirales	f__Lachnospiraceae	g__unclassified_f__Lachnospiraceae	s__unclassified_f__Lachnospiraceae	ASV704	0	0	0	0	0	0	0	0	0	0	0	0	0	0	0	0	0	0	0	7	0	0	0	21
d__Bacteria	k__norank_d__Bacteria	p__Firmicutes	c__Bacilli	o__RF39	f__norank_o__RF39	g__norank_f__norank_o__RF39	s__uncultured_bacterium_g__norank_f__norank_o__RF39	ASV3024	0	0	0	0	0	0	0	0	0	0	0	3	0	0	0	0	0	0	0	0	0	0	0	0
d__Bacteria	k__norank_d__Bacteria	p__Firmicutes	c__Clostridia	o__Oscillospirales	f__Oscillospiraceae	g__unclassified_f__Oscillospiraceae	s__unclassified_f__Oscillospiraceae	ASV264	31	27	43	36	13	20	25	18	39	27	0	0	21	0	8	23	25	41	21	22	23	21	12	41
d__Bacteria	k__norank_d__Bacteria	p__Firmicutes	c__Clostridia	o__Oscillospirales	f__Ruminococcaceae	g__Ruminococcus	s__unclassified_g__Ruminococcus	ASV413	0	0	0	0	0	0	0	0	0	12	0	0	0	0	0	0	0	0	0	0	0	0	0	0
d__Bacteria	k__norank_d__Bacteria	p__Firmicutes	c__Clostridia	o__Oscillospirales	f__Oscillospiraceae	g__NK4A214_group	s__unclassified_g__NK4A214_group	ASV2780	0	0	0	0	0	0	0	5	0	0	0	0	0	0	0	0	0	0	0	0	0	0	0	0
d__Bacteria	k__norank_d__Bacteria	p__Actinobacteriota	c__Coriobacteriia	o__Coriobacteriales	f__Eggerthellaceae	g__unclassified_f__Eggerthellaceae	s__unclassified_f__Eggerthellaceae	ASV880	0	0	0	3	0	0	0	0	0	3	0	0	0	4	0	0	0	0	4	0	0	0	0	5
d__Bacteria	k__norank_d__Bacteria	p__Firmicutes	c__Clostridia	o__norank_c__Clostridia	f__Hungateiclostridiaceae	g__Ruminiclostridium	s__uncultured_organism_g__Ruminiclostridium	ASV2752	0	0	0	0	0	0	0	0	0	0	0	0	0	0	0	1	0	0	0	0	0	0	0	0
d__Bacteria	k__norank_d__Bacteria	p__Bacteroidota	c__Bacteroidia	o__Bacteroidales	f__Muribaculaceae	g__norank_f__Muribaculaceae	s__uncultured_bacterium_g__norank_f__Muribaculaceae	ASV2857	0	0	0	0	0	0	0	0	0	0	0	0	0	0	0	0	0	26	0	0	0	0	0	0
d__Bacteria	k__norank_d__Bacteria	p__Firmicutes	c__Clostridia	o__Oscillospirales	f__Ruminococcaceae	g__Eubacterium_siraeum_group	s__uncultured_bacterium_g__Eubacterium_siraeum_group	ASV1034	0	0	0	0	0	22	0	0	0	0	0	22	0	9	0	0	0	0	0	0	0	0	15	0
d__Bacteria	k__norank_d__Bacteria	p__Firmicutes	c__Clostridia	o__Lachnospirales	f__Lachnospiraceae	g__unclassified_f__Lachnospiraceae	s__unclassified_f__Lachnospiraceae	ASV1593	5	0	0	0	0	0	0	0	0	0	4	0	6	0	0	5	0	0	4	0	0	0	0	0
d__Bacteria	k__norank_d__Bacteria	p__Firmicutes	c__Clostridia	o__Lachnospirales	f__Lachnospiraceae	g__unclassified_f__Lachnospiraceae	s__unclassified_f__Lachnospiraceae	ASV2706	0	0	0	0	0	0	0	0	0	0	0	0	0	0	0	36	0	0	0	0	0	0	0	0
d__Bacteria	k__norank_d__Bacteria	p__Firmicutes	c__Clostridia	o__Lachnospirales	f__Lachnospiraceae	g__Lachnospiraceae_NK4A136_group	s__uncultured_bacterium_g__Lachnospiraceae_NK4A136_group	ASV1925	0	0	0	51	0	0	0	0	0	0	0	0	30	0	0	0	0	0	0	0	0	0	0	0
d__Bacteria	k__norank_d__Bacteria	p__Firmicutes	c__Bacilli	o__Erysipelotrichales	f__Erysipelotrichaceae	g__Faecalibaculum	s__uncultured_bacterium_g__Faecalibaculum	ASV249	103	0	35	66	76	60	26	0	12	0	38	65	45	188	19	123	0	24	16	0	26	0	145	0
d__Bacteria	k__norank_d__Bacteria	p__Bacteroidota	c__Bacteroidia	o__Bacteroidales	f__Muribaculaceae	g__norank_f__Muribaculaceae	s__uncultured_bacterium_g__norank_f__Muribaculaceae	ASV312	0	0	0	3	0	0	0	0	6	0	8	4	0	0	0	0	0	13	0	0	5	0	0	0
d__Bacteria	k__norank_d__Bacteria	p__Bacteroidota	c__Bacteroidia	o__Bacteroidales	f__Muribaculaceae	g__norank_f__Muribaculaceae	s__mouse_gut_metagenome_g__norank_f__Muribaculaceae	ASV258	0	0	0	0	0	0	0	0	0	0	0	0	0	0	0	0	0	21	0	0	0	0	0	0
d__Bacteria	k__norank_d__Bacteria	p__Bacteroidota	c__Bacteroidia	o__Bacteroidales	f__Muribaculaceae	g__norank_f__Muribaculaceae	s__unclassified_g__norank_f__Muribaculaceae	ASV1960	0	0	0	13	0	0	0	0	0	0	0	0	0	0	0	0	0	0	0	0	13	0	0	0
d__Bacteria	k__norank_d__Bacteria	p__Firmicutes	c__Clostridia	o__Lachnospirales	f__Lachnospiraceae	g__unclassified_f__Lachnospiraceae	s__unclassified_f__Lachnospiraceae	ASV672	0	0	163	20	0	11	35	66	0	0	0	0	18	0	0	0	0	10	0	0	47	0	57	34
d__Bacteria	k__norank_d__Bacteria	p__Firmicutes	c__Clostridia	o__Lachnospirales	f__Lachnospiraceae	g__unclassified_f__Lachnospiraceae	s__unclassified_f__Lachnospiraceae	ASV897	4	0	0	12	0	17	14	3	0	0	0	0	7	0	2	8	3	9	13	0	5	0	0	3
d__Bacteria	k__norank_d__Bacteria	p__Firmicutes	c__Clostridia	o__Clostridia_vadinBB60_group	f__norank_o__Clostridia_vadinBB60_group	g__norank_f__norank_o__Clostridia_vadinBB60_group	s__unclassified_g__norank_f__norank_o__Clostridia_vadinBB60_group	ASV2551	0	0	0	0	0	3	5	0	0	0	0	0	0	0	0	0	0	0	0	0	0	0	0	0
d__Bacteria	k__norank_d__Bacteria	p__Firmicutes	c__Clostridia	o__Lachnospirales	f__Lachnospiraceae	g__unclassified_f__Lachnospiraceae	s__unclassified_f__Lachnospiraceae	ASV898	0	0	0	0	0	0	0	0	0	0	0	0	0	0	0	0	0	0	0	0	0	0	0	2
d__Bacteria	k__norank_d__Bacteria	p__Bacteroidota	c__Bacteroidia	o__Bacteroidales	f__Muribaculaceae	g__norank_f__Muribaculaceae	s__unclassified_g__norank_f__Muribaculaceae	ASV1968	0	0	0	15	0	0	0	0	0	0	0	0	0	0	0	0	0	0	0	17	0	0	0	0
d__Bacteria	k__norank_d__Bacteria	p__Firmicutes	c__Clostridia	o__Lachnospirales	f__Lachnospiraceae	g__unclassified_f__Lachnospiraceae	s__unclassified_f__Lachnospiraceae	ASV679	25	69	0	0	0	0	0	0	0	0	0	0	0	0	0	0	0	0	2557	0	0	649	0	38
d__Bacteria	k__norank_d__Bacteria	p__Firmicutes	c__Clostridia	o__Lachnospirales	f__Lachnospiraceae	g__Acetatifactor	s__uncultured_bacterium_g__Acetatifactor	ASV697	0	0	0	0	0	0	0	29	0	0	0	0	0	0	0	0	0	0	0	0	0	0	0	28
d__Bacteria	k__norank_d__Bacteria	p__Firmicutes	c__Bacilli	o__Erysipelotrichales	f__Erysipelotrichaceae	g__norank_f__Erysipelotrichaceae	s__uncultured_bacterium_g__norank_f__Erysipelotrichaceae	ASV2784	0	0	0	0	0	0	0	5	0	0	0	0	0	0	0	0	0	0	0	0	0	0	0	0
d__Bacteria	k__norank_d__Bacteria	p__Firmicutes	c__Clostridia	o__Oscillospirales	f__Oscillospiraceae	g__Oscillibacter	s__unclassified_g__Oscillibacter	ASV2702	0	0	0	0	0	0	0	0	0	0	0	0	0	0	0	30	0	0	0	0	0	0	0	0
d__Bacteria	k__norank_d__Bacteria	p__Firmicutes	c__Bacilli	o__unclassified_c__Bacilli	f__unclassified_c__Bacilli	g__unclassified_c__Bacilli	s__unclassified_c__Bacilli	ASV616	443	363	143	161	799	278	725	260	106	466	216	354	775	312	387	140	413	65	206	274	289	246	286	325
d__Bacteria	k__norank_d__Bacteria	p__Desulfobacterota	c__Desulfovibrionia	o__Desulfovibrionales	f__Desulfovibrionaceae	g__Desulfovibrio	s__uncultured_bacterium_g__Desulfovibrio	ASV1848	0	0	0	0	0	6	0	0	0	0	0	0	0	0	0	0	0	16	0	0	0	23	11	0
d__Bacteria	k__norank_d__Bacteria	p__Bacteroidota	c__Bacteroidia	o__Bacteroidales	f__Muribaculaceae	g__norank_f__Muribaculaceae	s__unclassified_g__norank_f__Muribaculaceae	ASV912	0	0	0	0	0	0	0	0	0	0	41	0	0	0	0	9	0	110	39	0	51	32	0	3
d__Bacteria	k__norank_d__Bacteria	p__Firmicutes	c__Clostridia	o__Lachnospirales	f__Lachnospiraceae	g__unclassified_f__Lachnospiraceae	s__unclassified_f__Lachnospiraceae	ASV2632	53	0	0	0	0	0	0	0	0	0	0	0	0	0	17	0	0	0	0	0	0	0	0	0
d__Bacteria	k__norank_d__Bacteria	p__Bacteroidota	c__Bacteroidia	o__Bacteroidales	f__Muribaculaceae	g__norank_f__Muribaculaceae	s__unclassified_g__norank_f__Muribaculaceae	ASV2986	0	0	0	0	0	0	5	0	0	0	0	0	0	0	0	0	5	0	0	0	0	0	0	0
d__Bacteria	k__norank_d__Bacteria	p__Bacteroidota	c__Bacteroidia	o__Bacteroidales	f__Muribaculaceae	g__norank_f__Muribaculaceae	s__unclassified_g__norank_f__Muribaculaceae	ASV1509	28	0	0	0	0	0	7	0	0	0	0	0	0	0	0	0	19	4	22	36	34	0	0	0
d__Bacteria	k__norank_d__Bacteria	p__Firmicutes	c__Clostridia	o__Oscillospirales	f__Oscillospiraceae	g__unclassified_f__Oscillospiraceae	s__unclassified_f__Oscillospiraceae	ASV135	0	0	0	22	0	17	0	16	0	22	0	0	0	15	0	47	33	24	0	0	0	28	0	0
d__Bacteria	k__norank_d__Bacteria	p__Firmicutes	c__Clostridia	o__Oscillospirales	f__Butyricicoccaceae	g__UCG-009	s__uncultured_bacterium_g__UCG-009	ASV1219	0	0	0	0	5	0	0	3	0	0	0	0	0	0	0	0	0	0	0	0	0	0	0	0
d__Bacteria	k__norank_d__Bacteria	p__Bacteroidota	c__Bacteroidia	o__Bacteroidales	f__Muribaculaceae	g__norank_f__Muribaculaceae	s__uncultured_bacterium_g__norank_f__Muribaculaceae	ASV2071	0	0	0	0	0	0	0	19	17	19	0	0	0	0	15	21	0	0	0	0	0	0	0	0
d__Bacteria	k__norank_d__Bacteria	p__Firmicutes	c__Bacilli	o__Lactobacillales	f__Lactobacillaceae	g__Lactobacillus	s__unclassified_g__Lactobacillus	ASV1205	0	0	0	0	10	0	0	0	0	0	0	0	0	0	0	0	0	0	0	0	0	0	0	0
d__Bacteria	k__norank_d__Bacteria	p__Firmicutes	c__Clostridia	o__Clostridia_UCG-014	f__norank_o__Clostridia_UCG-014	g__norank_f__norank_o__Clostridia_UCG-014	s__unclassified_g__norank_f__norank_o__Clostridia_UCG-014	ASV2680	0	0	0	0	0	0	0	0	0	0	0	0	0	0	0	0	0	0	0	0	11	0	0	0
d__Bacteria	k__norank_d__Bacteria	p__Bacteroidota	c__Bacteroidia	o__Bacteroidales	f__Muribaculaceae	g__norank_f__Muribaculaceae	s__mouse_gut_metagenome_g__norank_f__Muribaculaceae	ASV1867	0	0	0	0	0	16	0	0	0	20	0	0	0	0	0	0	0	0	0	0	0	16	0	0
d__Bacteria	k__norank_d__Bacteria	p__Firmicutes	c__Clostridia	o__Clostridia_UCG-014	f__norank_o__Clostridia_UCG-014	g__norank_f__norank_o__Clostridia_UCG-014	s__unclassified_g__norank_f__norank_o__Clostridia_UCG-014	ASV2199	0	0	0	0	0	0	0	0	0	0	43	103	0	0	0	30	0	54	0	20	0	0	0	0
d__Bacteria	k__norank_d__Bacteria	p__Bacteroidota	c__Bacteroidia	o__Bacteroidales	f__Muribaculaceae	g__norank_f__Muribaculaceae	s__uncultured_bacterium_g__norank_f__Muribaculaceae	ASV2275	0	0	0	0	0	0	0	0	0	0	0	0	0	6	0	0	0	0	0	0	0	0	0	0
d__Bacteria	k__norank_d__Bacteria	p__Firmicutes	c__Clostridia	o__Oscillospirales	f__Ruminococcaceae	g__Eubacterium_siraeum_group	s__uncultured_bacterium_g__Eubacterium_siraeum_group	ASV1850	14	0	0	0	0	23	0	0	0	0	0	0	12	0	12	0	0	0	0	0	0	19	0	0
d__Bacteria	k__norank_d__Bacteria	p__Bacteroidota	c__Bacteroidia	o__Bacteroidales	f__Muribaculaceae	g__norank_f__Muribaculaceae	s__unclassified_g__norank_f__Muribaculaceae	ASV1181	0	0	0	0	20	0	18	0	11	0	6	0	0	0	34	6	12	0	0	0	17	0	0	0
d__Bacteria	k__norank_d__Bacteria	p__Bacteroidota	c__Bacteroidia	o__Bacteroidales	f__Muribaculaceae	g__norank_f__Muribaculaceae	s__unclassified_g__norank_f__Muribaculaceae	ASV1185	9	0	13	28	18	21	23	0	13	48	19	16	0	30	0	22	12	14	29	22	22	0	29	0
d__Bacteria	k__norank_d__Bacteria	p__Firmicutes	c__Clostridia	o__Peptococcales	f__Peptococcaceae	g__norank_f__Peptococcaceae	s__unclassified_g__norank_f__Peptococcaceae	ASV2691	0	0	0	0	0	0	0	0	0	0	0	0	0	0	0	0	0	0	0	0	3	0	0	0
d__Bacteria	k__norank_d__Bacteria	p__Bacteroidota	c__Bacteroidia	o__Bacteroidales	f__Muribaculaceae	g__norank_f__Muribaculaceae	s__unclassified_g__norank_f__Muribaculaceae	ASV1187	0	0	0	0	18	0	0	0	0	0	0	0	7	0	24	0	12	0	11	0	0	0	0	0
d__Bacteria	k__norank_d__Bacteria	p__Firmicutes	c__Clostridia	o__Lachnospirales	f__Lachnospiraceae	g__unclassified_f__Lachnospiraceae	s__unclassified_f__Lachnospiraceae	ASV2852	0	0	0	0	0	0	0	0	0	0	0	14	0	0	0	0	61	84	0	0	0	0	0	0
d__Bacteria	k__norank_d__Bacteria	p__Firmicutes	c__Clostridia	o__Oscillospirales	f__Oscillospiraceae	g__unclassified_f__Oscillospiraceae	s__unclassified_f__Oscillospiraceae	ASV1899	0	0	0	0	0	4	0	0	0	0	0	5	0	0	0	0	0	0	0	0	0	3	0	0
d__Bacteria	k__norank_d__Bacteria	p__Firmicutes	c__Clostridia	o__Clostridia_UCG-014	f__norank_o__Clostridia_UCG-014	g__norank_f__norank_o__Clostridia_UCG-014	s__unclassified_g__norank_f__norank_o__Clostridia_UCG-014	ASV2468	0	0	0	0	0	0	0	0	0	0	12	0	0	0	0	0	0	0	0	0	0	0	0	0
d__Bacteria	k__norank_d__Bacteria	p__Patescibacteria	c__Saccharimonadia	o__Saccharimonadales	f__Saccharimonadaceae	g__Candidatus_Saccharimonas	s__uncultured_bacterium_g__Candidatus_Saccharimonas	ASV2521	0	0	0	0	0	26	0	0	0	0	0	0	0	0	0	0	0	0	0	0	0	0	0	0
d__Bacteria	k__norank_d__Bacteria	p__Firmicutes	c__Bacilli	o__Lactobacillales	f__Lactobacillaceae	g__Lactobacillus	s__unclassified_g__Lactobacillus	ASV131	0	38	0	0	0	0	0	0	0	0	0	0	0	0	0	0	0	0	0	0	0	0	0	0
d__Bacteria	k__norank_d__Bacteria	p__Firmicutes	c__Clostridia	o__Clostridia_UCG-014	f__norank_o__Clostridia_UCG-014	g__norank_f__norank_o__Clostridia_UCG-014	s__unclassified_g__norank_f__norank_o__Clostridia_UCG-014	ASV2466	5	0	0	0	0	0	0	0	0	0	12	12	0	0	0	0	0	11	0	0	13	0	0	0
d__Bacteria	k__norank_d__Bacteria	p__Actinobacteriota	c__Actinobacteria	o__Bifidobacteriales	f__Bifidobacteriaceae	g__Bifidobacterium	s__unclassified_g__Bifidobacterium	ASV1984	0	0	0	11	0	0	0	0	0	0	0	0	0	0	0	0	0	0	0	0	0	0	0	0
d__Bacteria	k__norank_d__Bacteria	p__Firmicutes	c__Clostridia	o__Oscillospirales	f__Oscillospiraceae	g__unclassified_f__Oscillospiraceae	s__unclassified_f__Oscillospiraceae	ASV485	0	0	11	0	0	0	0	5	0	0	0	0	0	0	0	11	0	0	0	0	7	0	0	10
d__Bacteria	k__norank_d__Bacteria	p__Firmicutes	c__Clostridia	o__Oscillospirales	f__Oscillospiraceae	g__unclassified_f__Oscillospiraceae	s__unclassified_f__Oscillospiraceae	ASV486	23	0	32	29	0	0	0	42	0	0	0	0	0	0	0	33	21	27	0	0	0	36	22	31
d__Bacteria	k__norank_d__Bacteria	p__Firmicutes	c__Bacilli	o__Bacillales	f__Planococcaceae	g__Sporosarcina	s__Sporosarcina_thermotolerans_g__Sporosarcina	ASV2452	0	0	0	0	0	0	0	0	0	0	20	0	0	0	0	0	0	0	0	0	0	0	0	0
d__Bacteria	k__norank_d__Bacteria	p__Firmicutes	c__Clostridia	o__Clostridia_UCG-014	f__norank_o__Clostridia_UCG-014	g__norank_f__norank_o__Clostridia_UCG-014	s__unclassified_g__norank_f__norank_o__Clostridia_UCG-014	ASV2261	12	0	0	0	0	9	0	0	0	0	0	10	0	15	0	0	0	0	0	0	0	0	0	0
d__Bacteria	k__norank_d__Bacteria	p__Firmicutes	c__Clostridia	o__Lachnospirales	f__Lachnospiraceae	g__unclassified_f__Lachnospiraceae	s__unclassified_f__Lachnospiraceae	ASV1951	0	0	12	19	0	0	16	0	0	0	0	0	0	0	0	0	29	0	0	0	0	0	0	0
d__Bacteria	k__norank_d__Bacteria	p__Firmicutes	c__Clostridia	o__Lachnospirales	f__Lachnospiraceae	g__unclassified_f__Lachnospiraceae	s__unclassified_f__Lachnospiraceae	ASV1950	0	0	81	19	0	0	0	0	0	0	0	0	0	0	0	18	35	0	0	0	0	0	9	0
d__Bacteria	k__norank_d__Bacteria	p__Firmicutes	c__Clostridia	o__Clostridia_vadinBB60_group	f__norank_o__Clostridia_vadinBB60_group	g__norank_f__norank_o__Clostridia_vadinBB60_group	s__uncultured_Clostridia_bacterium_g__norank_f__norank_o__Clostridia_vadinBB60_group	ASV2883	0	0	0	0	0	0	9	0	0	0	0	0	0	0	0	0	0	3	0	0	0	0	0	0
d__Bacteria	k__norank_d__Bacteria	p__Firmicutes	c__Clostridia	o__Lachnospirales	f__Lachnospiraceae	g__unclassified_f__Lachnospiraceae	s__unclassified_f__Lachnospiraceae	ASV1958	0	0	7	19	0	0	0	0	0	0	0	0	0	0	0	0	0	0	0	0	0	0	0	0
d__Bacteria	k__norank_d__Bacteria	p__Firmicutes	c__Clostridia	o__Lachnospirales	f__Lachnospiraceae	g__Acetatifactor	s__uncultured_bacterium_g__Acetatifactor	ASV1178	0	0	104	34	20	29	0	0	46	0	0	0	0	0	0	19	54	51	0	0	25	37	0	0
d__Bacteria	k__norank_d__Bacteria	p__Bacteroidota	c__Bacteroidia	o__Bacteroidales	f__Muribaculaceae	g__norank_f__Muribaculaceae	s__uncultured_bacterium_g__norank_f__Muribaculaceae	ASV2252	0	0	0	0	0	0	0	0	0	0	0	0	0	31	0	0	0	0	0	0	0	0	0	0
d__Bacteria	k__norank_d__Bacteria	p__Bacteroidota	c__Bacteroidia	o__Bacteroidales	f__Muribaculaceae	g__norank_f__Muribaculaceae	s__uncultured_bacterium_g__norank_f__Muribaculaceae	ASV3073	0	0	0	0	0	0	32	0	0	0	0	0	0	0	0	0	0	0	0	0	0	0	0	0
d__Bacteria	k__norank_d__Bacteria	p__Bacteroidota	c__Bacteroidia	o__Bacteroidales	f__Muribaculaceae	g__norank_f__Muribaculaceae	s__uncultured_bacterium_g__norank_f__Muribaculaceae	ASV3076	0	0	0	0	0	0	16	0	0	0	0	0	0	0	0	0	0	0	0	0	0	0	0	0
d__Bacteria	k__norank_d__Bacteria	p__Firmicutes	c__Clostridia	o__Lachnospirales	f__Lachnospiraceae	g__Lachnospiraceae_UCG-001	s__uncultured_bacterium_g__Lachnospiraceae_UCG-001	ASV2902	0	12	0	0	0	0	0	0	0	0	0	0	0	0	0	0	0	0	0	0	0	0	0	0
d__Bacteria	k__norank_d__Bacteria	p__Firmicutes	c__Clostridia	o__Lachnospirales	f__Lachnospiraceae	g__Lachnospiraceae_UCG-001	s__uncultured_bacterium_g__Lachnospiraceae_UCG-001	ASV2901	0	9	0	0	0	0	0	0	0	0	0	0	0	0	0	0	0	0	0	0	0	0	0	0
d__Bacteria	k__norank_d__Bacteria	p__Firmicutes	c__Bacilli	o__Bacillales	f__Bacillaceae	g__Bacillus	s__unclassified_g__Bacillus	ASV2356	0	0	1	0	0	6	0	0	0	0	0	0	0	0	0	0	0	0	0	0	0	0	0	0
d__Bacteria	k__norank_d__Bacteria	p__Firmicutes	c__Clostridia	o__Lachnospirales	f__Lachnospiraceae	g__unclassified_f__Lachnospiraceae	s__unclassified_f__Lachnospiraceae	ASV1557	0	0	0	0	0	0	0	0	0	0	0	0	0	0	0	0	0	0	10	0	0	0	0	0
d__Bacteria	k__norank_d__Bacteria	p__Firmicutes	c__Clostridia	o__Lachnospirales	f__Lachnospiraceae	g__unclassified_f__Lachnospiraceae	s__unclassified_f__Lachnospiraceae	ASV1555	0	0	0	0	0	0	0	0	0	0	0	0	0	0	0	0	0	0	10	0	0	0	0	0
d__Bacteria	k__norank_d__Bacteria	p__Firmicutes	c__Clostridia	o__Lachnospirales	f__Lachnospiraceae	g__unclassified_f__Lachnospiraceae	s__unclassified_f__Lachnospiraceae	ASV1398	0	0	0	0	0	0	14	0	0	0	0	0	0	0	0	0	0	0	0	0	0	0	0	0
d__Bacteria	k__norank_d__Bacteria	p__Firmicutes	c__Clostridia	o__Oscillospirales	f__Oscillospiraceae	g__norank_f__Oscillospiraceae	s__uncultured_bacterium_g__norank_f__Oscillospiraceae	ASV1689	0	0	0	0	0	0	11	0	0	0	17	0	0	0	0	0	0	0	0	0	0	0	0	0
d__Bacteria	k__norank_d__Bacteria	p__Firmicutes	c__Clostridia	o__Clostridia_UCG-014	f__norank_o__Clostridia_UCG-014	g__norank_f__norank_o__Clostridia_UCG-014	s__unclassified_g__norank_f__norank_o__Clostridia_UCG-014	ASV1228	0	0	0	0	3	0	16	0	0	0	0	0	15	0	0	0	0	0	0	0	0	0	0	0
d__Bacteria	k__norank_d__Bacteria	p__Bacteroidota	c__Bacteroidia	o__Bacteroidales	f__Muribaculaceae	g__norank_f__Muribaculaceae	s__uncultured_bacterium_g__norank_f__Muribaculaceae	ASV1817	0	0	0	6	0	42	0	0	0	0	0	0	0	10	0	0	0	0	0	32	0	43	44	0
d__Bacteria	k__norank_d__Bacteria	p__Firmicutes	c__Clostridia	o__Lachnospirales	f__Lachnospiraceae	g__unclassified_f__Lachnospiraceae	s__unclassified_f__Lachnospiraceae	ASV1396	0	0	0	0	0	0	0	0	0	0	0	0	0	0	0	0	10	66	0	36	0	0	0	0
d__Bacteria	k__norank_d__Bacteria	p__Firmicutes	c__Clostridia	o__Oscillospirales	f__Oscillospiraceae	g__norank_f__Oscillospiraceae	s__uncultured_bacterium_g__norank_f__Oscillospiraceae	ASV1681	25	24	15	0	0	20	21	20	0	0	0	0	0	0	0	19	0	0	0	0	0	27	11	0
d__Bacteria	k__norank_d__Bacteria	p__Firmicutes	c__Clostridia	o__Lachnospirales	f__Lachnospiraceae	g__Lachnospiraceae_NK4A136_group	s__unclassified_g__Lachnospiraceae_NK4A136_group	ASV1519	0	0	0	0	0	0	0	0	0	0	0	0	0	0	0	0	0	0	20	0	0	0	0	0
d__Bacteria	k__norank_d__Bacteria	p__Firmicutes	c__Clostridia	o__Oscillospirales	f__Ruminococcaceae	g__norank_f__Ruminococcaceae	s__unclassified_g__norank_f__Ruminococcaceae	ASV2352	0	0	4	0	0	0	0	0	0	0	0	0	0	0	0	0	0	0	0	0	0	0	0	0
d__Bacteria	k__norank_d__Bacteria	p__Firmicutes	c__Clostridia	o__Lachnospirales	f__Lachnospiraceae	g__Lachnospiraceae_NK4A136_group	s__unclassified_g__Lachnospiraceae_NK4A136_group	ASV1515	0	0	0	0	0	0	0	0	0	0	0	0	0	0	0	0	0	0	21	0	0	0	0	0
d__Bacteria	k__norank_d__Bacteria	p__Bacteroidota	c__Bacteroidia	o__Bacteroidales	f__Muribaculaceae	g__norank_f__Muribaculaceae	s__unclassified_g__norank_f__Muribaculaceae	ASV681	55	45	0	0	0	44	0	46	0	34	22	0	0	0	0	0	0	0	0	0	54	21	0	33
d__Bacteria	k__norank_d__Bacteria	p__Bacteroidota	c__Bacteroidia	o__Bacteroidales	f__Muribaculaceae	g__norank_f__Muribaculaceae	s__unclassified_g__norank_f__Muribaculaceae	ASV688	76	48	20	39	0	35	100	24	80	0	46	50	33	62	61	87	33	130	85	31	82	38	46	35
d__Bacteria	k__norank_d__Bacteria	p__Firmicutes	c__Clostridia	o__Lachnospirales	f__Lachnospiraceae	g__Lachnospiraceae_NK4A136_group	s__unclassified_g__Lachnospiraceae_NK4A136_group	ASV400	0	0	0	0	19	0	0	0	0	0	0	0	0	0	0	0	0	0	0	0	0	0	0	0
d__Bacteria	k__norank_d__Bacteria	p__Firmicutes	c__Clostridia	o__Lachnospirales	f__Lachnospiraceae	g__Lachnospiraceae_NK4A136_group	s__unclassified_g__Lachnospiraceae_NK4A136_group	ASV403	0	0	0	15	0	26	0	0	55	0	31	22	0	11	0	13	0	98	0	0	0	0	36	37
d__Bacteria	k__norank_d__Bacteria	p__Firmicutes	c__Clostridia	o__Lachnospirales	f__Lachnospiraceae	g__Eubacterium_xylanophilum_group	s__uncultured_bacterium_g__Eubacterium_xylanophilum_group	ASV102	0	0	0	34	0	0	0	0	0	0	49	56	18	0	0	0	24	0	0	0	33	0	0	0
d__Bacteria	k__norank_d__Bacteria	p__Firmicutes	c__Clostridia	o__Clostridia_UCG-014	f__norank_o__Clostridia_UCG-014	g__norank_f__norank_o__Clostridia_UCG-014	s__unclassified_g__norank_f__norank_o__Clostridia_UCG-014	ASV1312	0	0	0	0	0	0	10	0	0	0	0	0	0	0	0	0	0	0	0	0	0	0	0	0
d__Bacteria	k__norank_d__Bacteria	p__Firmicutes	c__Clostridia	o__Monoglobales	f__Monoglobaceae	g__Monoglobus	s__unclassified_g__Monoglobus	ASV2504	0	0	0	0	0	0	5	0	0	0	2	3	0	0	0	0	0	0	0	0	0	0	0	0
d__Bacteria	k__norank_d__Bacteria	p__Firmicutes	c__Clostridia	o__Oscillospirales	f__Butyricicoccaceae	g__UCG-009	s__uncultured_bacterium_g__UCG-009	ASV2750	0	0	0	0	0	0	0	0	0	0	0	0	0	0	0	3	0	0	0	0	0	0	0	0
d__Bacteria	k__norank_d__Bacteria	p__Firmicutes	c__Clostridia	o__Clostridia_UCG-014	f__norank_o__Clostridia_UCG-014	g__norank_f__norank_o__Clostridia_UCG-014	s__unclassified_g__norank_f__norank_o__Clostridia_UCG-014	ASV1959	0	0	0	15	0	0	0	0	0	0	0	0	0	0	0	0	0	0	0	0	0	0	0	0
d__Bacteria	k__norank_d__Bacteria	p__Firmicutes	c__Clostridia	o__Clostridia_UCG-014	f__norank_o__Clostridia_UCG-014	g__norank_f__norank_o__Clostridia_UCG-014	s__unclassified_g__norank_f__norank_o__Clostridia_UCG-014	ASV1956	0	0	27	18	0	0	14	10	0	0	0	0	0	13	0	0	10	0	0	0	0	0	0	0
d__Bacteria	k__norank_d__Bacteria	p__Firmicutes	c__Clostridia	o__Lachnospirales	f__Lachnospiraceae	g__unclassified_f__Lachnospiraceae	s__unclassified_f__Lachnospiraceae	ASV2823	0	0	0	0	0	0	0	0	0	0	0	0	0	0	36	0	0	0	0	0	0	0	0	0
d__Bacteria	k__norank_d__Bacteria	p__Desulfobacterota	c__Desulfovibrionia	o__Desulfovibrionales	f__Desulfovibrionaceae	g__Desulfovibrio	s__uncultured_bacterium_g__Desulfovibrio	ASV2825	0	0	0	0	0	0	0	0	0	0	0	0	0	0	31	0	0	0	0	0	0	0	0	0
d__Bacteria	k__norank_d__Bacteria	p__Firmicutes	c__Clostridia	o__Oscillospirales	f__Oscillospiraceae	g__Oscillibacter	s__uncultured_bacterium_g__Oscillibacter	ASV2443	0	0	0	0	0	0	0	0	0	0	41	0	0	0	0	0	0	0	0	0	0	0	0	0
d__Bacteria	k__norank_d__Bacteria	p__Bacteroidota	c__Bacteroidia	o__Bacteroidales	f__Muribaculaceae	g__norank_f__Muribaculaceae	s__uncultured_bacterium_g__norank_f__Muribaculaceae	ASV426	0	0	0	0	15	15	34	0	46	0	0	0	12	0	99	0	19	29	0	0	23	0	10	0
d__Bacteria	k__norank_d__Bacteria	p__Actinobacteriota	c__Coriobacteriia	o__Coriobacteriales	f__Eggerthellaceae	g__Adlercreutzia	s__uncultured_bacterium_g__Adlercreutzia	ASV287	0	14	0	0	15	17	4	0	3	0	0	0	10	0	11	8	17	0	0	15	10	18	9	9
d__Bacteria	k__norank_d__Bacteria	p__Firmicutes	c__Clostridia	o__Oscillospirales	f__Ruminococcaceae	g__norank_f__Ruminococcaceae	s__Ruminococcaceae_bacterium_Marseille-P3738	ASV2433	0	0	0	0	0	0	0	0	2	0	0	0	0	0	0	0	0	0	0	0	0	0	0	0
d__Bacteria	k__norank_d__Bacteria	p__Firmicutes	c__Clostridia	o__Lachnospirales	f__Lachnospiraceae	g__unclassified_f__Lachnospiraceae	s__unclassified_f__Lachnospiraceae	ASV2527	45	0	0	0	0	22	76	32	0	0	0	0	0	0	0	0	0	0	0	0	34	0	0	0
d__Bacteria	k__norank_d__Bacteria	p__Firmicutes	c__Clostridia	o__Lachnospirales	f__Lachnospiraceae	g__unclassified_f__Lachnospiraceae	s__unclassified_f__Lachnospiraceae	ASV2526	12	0	0	0	0	24	0	0	0	0	0	0	0	0	0	0	0	0	0	0	0	0	11	0
d__Bacteria	k__norank_d__Bacteria	p__Firmicutes	c__Clostridia	o__Lachnospirales	f__Lachnospiraceae	g__unclassified_f__Lachnospiraceae	s__unclassified_f__Lachnospiraceae	ASV2524	0	0	0	0	0	20	0	0	0	0	0	0	0	0	0	0	0	0	0	0	0	0	21	0
d__Bacteria	k__norank_d__Bacteria	p__Bacteroidota	c__Bacteroidia	o__Bacteroidales	f__Muribaculaceae	g__norank_f__Muribaculaceae	s__uncultured_bacterium_g__norank_f__Muribaculaceae	ASV429	34	0	0	0	0	0	0	0	7	0	0	0	0	0	0	0	0	0	19	16	0	0	13	0
d__Bacteria	k__norank_d__Bacteria	p__Firmicutes	c__Clostridia	o__Lachnospirales	f__Lachnospiraceae	g__unclassified_f__Lachnospiraceae	s__unclassified_f__Lachnospiraceae	ASV2520	0	0	0	0	0	22	0	0	0	0	0	0	0	0	0	0	0	0	0	0	0	0	0	0
d__Bacteria	k__norank_d__Bacteria	p__Firmicutes	c__Clostridia	o__Lachnospirales	f__Lachnospiraceae	g__unclassified_f__Lachnospiraceae	s__unclassified_f__Lachnospiraceae	ASV875	0	10	0	0	0	0	0	0	0	0	0	0	0	0	0	0	45	25	0	0	0	0	0	6
d__Bacteria	k__norank_d__Bacteria	p__Firmicutes	c__Clostridia	o__Lachnospirales	f__Lachnospiraceae	g__A2	s__unclassified_g__A2	ASV2267	0	28	0	0	0	0	0	8	0	0	0	0	0	8	0	0	0	0	0	0	0	0	0	0
d__Bacteria	k__norank_d__Bacteria	p__Firmicutes	c__Bacilli	o__Staphylococcales	f__Staphylococcaceae	g__Jeotgalicoccus	s__unclassified_g__Jeotgalicoccus	ASV2495	0	0	0	0	0	0	0	0	0	0	3	0	0	0	0	2	0	0	0	0	0	0	0	0
d__Bacteria	k__norank_d__Bacteria	p__Firmicutes	c__Clostridia	o__Oscillospirales	f__Oscillospiraceae	g__unclassified_f__Oscillospiraceae	s__unclassified_f__Oscillospiraceae	ASV2722	0	0	0	0	0	0	0	0	0	0	0	0	0	0	0	13	0	0	0	0	0	0	0	0
d__Bacteria	k__norank_d__Bacteria	p__Firmicutes	c__Bacilli	o__Bacillales	f__Bacillaceae	g__Bacillus	s__Lactobacillus_vaginalis_g__Bacillus	ASV644	29	47	26	33	0	21	0	43	0	0	101	0	0	105	0	0	0	0	52	134	32	33	79	53
d__Bacteria	k__norank_d__Bacteria	p__Firmicutes	c__Clostridia	o__Lachnospirales	f__Lachnospiraceae	g__unclassified_f__Lachnospiraceae	s__unclassified_f__Lachnospiraceae	ASV786	0	0	0	0	0	0	0	0	0	0	0	0	0	0	0	0	0	0	0	0	0	0	0	14
d__Bacteria	k__norank_d__Bacteria	p__Firmicutes	c__Clostridia	o__Oscillospirales	f__Oscillospiraceae	g__unclassified_f__Oscillospiraceae	s__unclassified_f__Oscillospiraceae	ASV2296	0	0	30	0	0	0	0	0	0	0	0	0	0	0	0	0	0	0	0	0	0	0	0	0
d__Bacteria	k__norank_d__Bacteria	p__Bacteroidota	c__Bacteroidia	o__Bacteroidales	f__Muribaculaceae	g__norank_f__Muribaculaceae	s__unclassified_g__norank_f__Muribaculaceae	ASV3069	2	0	0	0	0	0	0	0	0	0	0	0	0	0	0	0	0	0	0	0	0	0	0	0
d__Bacteria	k__norank_d__Bacteria	p__Firmicutes	c__Clostridia	o__norank_c__Clostridia	f__Hungateiclostridiaceae	g__Ruminiclostridium	s__uncultured_organism_g__Ruminiclostridium	ASV2243	0	0	0	0	0	0	0	0	0	0	0	0	0	0	0	0	0	0	0	2	6	0	0	0
d__Bacteria	k__norank_d__Bacteria	p__Firmicutes	c__Clostridia	o__Oscillospirales	f__Eubacterium_coprostanoligenes_group	g__norank_f__Eubacterium_coprostanoligenes_group	s__unclassified_g__norank_f__Eubacterium_coprostanoligenes_group	ASV1934	0	0	0	27	0	12	0	0	0	0	0	24	0	20	0	0	0	35	0	0	38	0	14	0
d__Bacteria	k__norank_d__Bacteria	p__Firmicutes	c__Clostridia	o__Oscillospirales	f__Ruminococcaceae	g__UBA1819	s__uncultured_bacterium_g__UBA1819	ASV1880	0	0	0	0	0	0	0	0	7	0	0	0	0	0	0	0	0	0	0	0	0	10	0	0
d__Bacteria	k__norank_d__Bacteria	p__Firmicutes	c__Clostridia	o__Lachnospirales	f__Lachnospiraceae	g__unclassified_f__Lachnospiraceae	s__unclassified_f__Lachnospiraceae	ASV1423	42	0	0	0	0	0	0	10	0	0	0	0	85	0	0	165	0	0	0	0	0	0	0	0
d__Bacteria	k__norank_d__Bacteria	p__Firmicutes	c__Clostridia	o__Oscillospirales	f__UCG-010	g__norank_f__UCG-010	s__unclassified_g__norank_f__UCG-010	ASV896	0	0	0	1	0	0	0	4	0	0	0	6	0	0	0	0	0	0	0	0	6	0	0	4
d__Bacteria	k__norank_d__Bacteria	p__Firmicutes	c__Clostridia	o__Clostridia_UCG-014	f__norank_o__Clostridia_UCG-014	g__norank_f__norank_o__Clostridia_UCG-014	s__unclassified_g__norank_f__norank_o__Clostridia_UCG-014	ASV2856	0	0	0	0	0	0	0	0	0	0	0	0	0	0	0	0	0	19	0	0	0	0	0	0
d__Bacteria	k__norank_d__Bacteria	p__Bacteroidota	c__Bacteroidia	o__Bacteroidales	f__Muribaculaceae	g__norank_f__Muribaculaceae	s__uncultured_bacterium_g__norank_f__Muribaculaceae	ASV2474	0	0	0	0	0	0	0	0	0	0	10	0	0	0	0	0	0	0	0	0	0	0	0	0
d__Bacteria	k__norank_d__Bacteria	p__Firmicutes	c__Clostridia	o__Clostridia_UCG-014	f__norank_o__Clostridia_UCG-014	g__norank_f__norank_o__Clostridia_UCG-014	s__unclassified_g__norank_f__norank_o__Clostridia_UCG-014	ASV2408	0	0	0	0	0	0	0	0	7	0	0	0	0	0	0	0	0	0	0	0	0	0	0	0
d__Bacteria	k__norank_d__Bacteria	p__Firmicutes	c__Clostridia	o__Clostridia_UCG-014	f__norank_o__Clostridia_UCG-014	g__norank_f__norank_o__Clostridia_UCG-014	s__unclassified_g__norank_f__norank_o__Clostridia_UCG-014	ASV2194	0	0	68	0	0	0	0	0	0	0	0	0	0	0	0	0	0	0	0	29	45	0	0	0
d__Bacteria	k__norank_d__Bacteria	p__Actinobacteriota	c__Actinobacteria	o__Bifidobacteriales	f__Bifidobacteriaceae	g__Aeriscardovia	s__unclassified_g__Aeriscardovia	ASV624	107	63	78	69	49	26	71	140	29	6	9	101	49	99	85	140	55	17	29	108	25	33	68	111
d__Bacteria	k__norank_d__Bacteria	p__Firmicutes	c__Clostridia	o__Lachnospirales	f__Lachnospiraceae	g__unclassified_f__Lachnospiraceae	s__unclassified_f__Lachnospiraceae	ASV2862	0	0	0	0	0	0	0	0	0	0	0	0	0	0	0	0	0	16	0	0	0	0	0	0
d__Bacteria	k__norank_d__Bacteria	p__Firmicutes	c__Clostridia	o__Lachnospirales	f__Lachnospiraceae	g__unclassified_f__Lachnospiraceae	s__unclassified_f__Lachnospiraceae	ASV2863	14	0	0	0	0	0	0	0	0	0	0	0	0	0	0	0	0	14	0	0	0	0	0	0
d__Bacteria	k__norank_d__Bacteria	p__Firmicutes	c__Bacilli	o__RF39	f__norank_o__RF39	g__norank_f__norank_o__RF39	s__metagenome_g__norank_f__norank_o__RF39	ASV2272	0	0	0	0	0	0	0	0	0	0	0	0	0	6	0	0	6	0	0	0	0	0	0	0
d__Bacteria	k__norank_d__Bacteria	p__Firmicutes	c__Clostridia	o__Lachnospirales	f__Lachnospiraceae	g__unclassified_f__Lachnospiraceae	s__unclassified_f__Lachnospiraceae	ASV2861	0	0	0	0	0	0	0	0	0	0	0	0	0	0	0	0	0	18	0	0	0	0	0	0
d__Bacteria	k__norank_d__Bacteria	p__Firmicutes	c__Bacilli	o__RF39	f__norank_o__RF39	g__norank_f__norank_o__RF39	s__unclassified_g__norank_f__norank_o__RF39	ASV2005	0	0	0	7	0	0	0	0	0	0	0	0	0	0	0	0	0	0	0	0	0	0	0	0
d__Bacteria	k__norank_d__Bacteria	p__Firmicutes	c__Bacilli	o__RF39	f__norank_o__RF39	g__norank_f__norank_o__RF39	s__unclassified_g__norank_f__norank_o__RF39	ASV2556	0	0	0	0	0	3	0	0	0	0	0	0	0	0	0	0	0	0	0	0	0	0	0	0
d__Bacteria	k__norank_d__Bacteria	p__Actinobacteriota	c__Coriobacteriia	o__Coriobacteriales	f__Atopobiaceae	g__Coriobacteriaceae_UCG-002	s__uncultured_bacterium_g__Coriobacteriaceae_UCG-002	ASV1594	0	0	0	0	0	0	0	0	0	0	0	3	0	0	0	10	0	0	2	0	0	8	0	0
d__Bacteria	k__norank_d__Bacteria	p__Firmicutes	c__Clostridia	o__Lachnospirales	f__Lachnospiraceae	g__unclassified_f__Lachnospiraceae	s__unclassified_f__Lachnospiraceae	ASV2868	0	0	0	0	0	0	0	0	0	0	0	0	0	0	0	0	0	9	0	0	0	0	0	0
d__Bacteria	k__norank_d__Bacteria	p__Desulfobacterota	c__Desulfovibrionia	o__Desulfovibrionales	f__Desulfovibrionaceae	g__Desulfovibrio	s__uncultured_bacterium_g__Desulfovibrio	ASV772	0	5	4	8	0	6	14	19	0	6	0	0	0	7	0	0	19	0	0	0	0	0	0	15
d__Bacteria	k__norank_d__Bacteria	p__Bacteroidota	c__Bacteroidia	o__Bacteroidales	f__Prevotellaceae	g__Prevotellaceae_NK3B31_group	s__uncultured_bacterium_g__Prevotellaceae_NK3B31_group	ASV1981	71	0	10	11	0	0	0	0	0	0	0	8	22	0	0	0	0	0	0	26	17	0	0	0
d__Bacteria	k__norank_d__Bacteria	p__Firmicutes	c__Clostridia	o__Lachnospirales	f__Lachnospiraceae	g__unclassified_f__Lachnospiraceae	s__unclassified_f__Lachnospiraceae	ASV469	51	0	0	0	0	0	0	0	0	0	0	0	0	0	0	0	0	0	0	0	0	0	0	0
d__Bacteria	k__norank_d__Bacteria	p__Firmicutes	c__Clostridia	o__Clostridia_UCG-014	f__norank_o__Clostridia_UCG-014	g__norank_f__norank_o__Clostridia_UCG-014	s__unclassified_g__norank_f__norank_o__Clostridia_UCG-014	ASV2033	0	0	0	1	0	4	0	0	0	0	0	0	0	0	0	0	0	0	0	0	0	0	0	0
d__Bacteria	k__norank_d__Bacteria	p__Bacteroidota	c__Bacteroidia	o__Bacteroidales	f__Prevotellaceae	g__unclassified_f__Prevotellaceae	s__unclassified_f__Prevotellaceae	ASV3005	0	0	0	0	0	0	0	0	0	0	0	23	0	0	0	0	0	0	0	0	0	0	0	0
d__Bacteria	k__norank_d__Bacteria	p__Bacteroidota	c__Bacteroidia	o__Bacteroidales	f__Muribaculaceae	g__norank_f__Muribaculaceae	s__uncultured_bacterium_g__norank_f__Muribaculaceae	ASV2916	0	0	0	0	0	0	14	0	0	0	0	0	17	0	0	0	15	0	0	0	0	0	0	0
d__Bacteria	k__norank_d__Bacteria	p__Firmicutes	c__Clostridia	o__Clostridia_UCG-014	f__norank_o__Clostridia_UCG-014	g__norank_f__norank_o__Clostridia_UCG-014	s__unclassified_g__norank_f__norank_o__Clostridia_UCG-014	ASV2529	0	0	0	0	0	18	0	0	0	0	0	0	0	0	0	0	0	0	0	0	0	0	30	0
d__Bacteria	k__norank_d__Bacteria	p__Firmicutes	c__Clostridia	o__Oscillospirales	f__Ruminococcaceae	g__norank_f__Ruminococcaceae	s__Ruminococcus_sp._YE281	ASV1145	0	0	0	2	53	0	504	0	0	0	0	0	0	0	0	0	191	0	0	0	0	0	0	0
d__Bacteria	k__norank_d__Bacteria	p__Patescibacteria	c__Saccharimonadia	o__Saccharimonadales	f__Saccharimonadaceae	g__Candidatus_Saccharimonas	s__uncultured_bacterium_g__Candidatus_Saccharimonas	ASV1770	0	0	0	0	0	4	0	0	0	12	0	8	0	0	0	0	0	0	0	0	0	0	6	0
d__Bacteria	k__norank_d__Bacteria	p__Firmicutes	c__Bacilli	o__unclassified_c__Bacilli	f__unclassified_c__Bacilli	g__unclassified_c__Bacilli	s__unclassified_c__Bacilli	ASV1814	0	0	0	0	0	0	0	0	0	0	0	0	0	0	0	0	0	0	0	0	0	51	0	0
d__Bacteria	k__norank_d__Bacteria	p__Firmicutes	c__Clostridia	o__unclassified_c__Clostridia	f__unclassified_c__Clostridia	g__unclassified_c__Clostridia	s__unclassified_c__Clostridia	ASV2021	0	0	0	4	0	0	0	0	0	0	0	0	0	0	0	0	0	0	0	0	0	0	0	0
d__Bacteria	k__norank_d__Bacteria	p__Actinobacteriota	c__Coriobacteriia	o__Coriobacteriales	f__Eggerthellaceae	g__Enterorhabdus	s__uncultured_bacterium_g__Enterorhabdus	ASV2557	0	0	0	0	0	1	0	0	0	0	0	0	0	0	0	0	0	0	0	0	0	0	0	0
d__Bacteria	k__norank_d__Bacteria	p__Firmicutes	c__Clostridia	o__Oscillospirales	f__Ruminococcaceae	g__Ruminococcus	s__unclassified_g__Ruminococcus	ASV621	0	269	0	0	0	0	0	199	0	0	0	0	0	0	0	103	0	0	0	0	0	0	0	136
d__Bacteria	k__norank_d__Bacteria	p__Firmicutes	c__Clostridia	o__Oscillospirales	f__Oscillospiraceae	g__unclassified_f__Oscillospiraceae	s__unclassified_f__Oscillospiraceae	ASV272	0	2	0	7	2	0	8	7	0	0	0	0	0	0	0	5	0	0	0	0	6	0	0	11
d__Bacteria	k__norank_d__Bacteria	p__Firmicutes	c__Clostridia	o__Oscillospirales	f__Oscillospiraceae	g__norank_f__Oscillospiraceae	s__unclassified_g__norank_f__Oscillospiraceae	ASV683	0	0	0	0	25	22	22	119	80	0	80	0	0	0	0	0	0	20	0	0	0	0	0	30
d__Bacteria	k__norank_d__Bacteria	p__Bacteroidota	c__Bacteroidia	o__Bacteroidales	f__Muribaculaceae	g__norank_f__Muribaculaceae	s__uncultured_bacterium_g__norank_f__Muribaculaceae	ASV2824	0	0	0	0	0	0	0	0	0	0	0	0	0	0	34	0	0	0	0	0	0	0	0	0
d__Bacteria	k__norank_d__Bacteria	p__Firmicutes	c__Bacilli	o__unclassified_c__Bacilli	f__unclassified_c__Bacilli	g__unclassified_c__Bacilli	s__unclassified_c__Bacilli	ASV1140	0	0	0	0	58	0	42	0	0	0	0	0	57	0	22	0	0	0	0	0	0	0	0	0
d__Bacteria	k__norank_d__Bacteria	p__Bacteroidota	c__Bacteroidia	o__Bacteroidales	f__Muribaculaceae	g__norank_f__Muribaculaceae	s__uncultured_bacterium_g__norank_f__Muribaculaceae	ASV854	21	0	0	0	0	0	0	0	0	0	0	9	0	18	16	0	15	0	0	5	0	0	0	7
d__Bacteria	k__norank_d__Bacteria	p__Firmicutes	c__Bacilli	o__RF39	f__norank_o__RF39	g__norank_f__norank_o__RF39	s__unclassified_g__norank_f__norank_o__RF39	ASV2225	0	0	0	0	0	0	0	0	0	0	0	0	0	0	0	0	0	0	0	7	0	0	0	0
d__Bacteria	k__norank_d__Bacteria	p__Firmicutes	c__Clostridia	o__Clostridia_UCG-014	f__norank_o__Clostridia_UCG-014	g__norank_f__norank_o__Clostridia_UCG-014	s__unclassified_g__norank_f__norank_o__Clostridia_UCG-014	ASV2291	0	0	33	0	0	0	0	0	0	0	0	0	0	0	0	0	6	3	0	0	0	0	0	0
d__Bacteria	k__norank_d__Bacteria	p__Firmicutes	c__Clostridia	o__Clostridia_UCG-014	f__norank_o__Clostridia_UCG-014	g__norank_f__norank_o__Clostridia_UCG-014	s__unclassified_g__norank_f__norank_o__Clostridia_UCG-014	ASV2325	0	0	7	0	0	0	0	0	0	0	11	9	0	0	0	0	0	0	0	0	0	0	0	0
d__Bacteria	k__norank_d__Bacteria	p__Firmicutes	c__Clostridia	o__Clostridia_UCG-014	f__norank_o__Clostridia_UCG-014	g__norank_f__norank_o__Clostridia_UCG-014	s__unclassified_g__norank_f__norank_o__Clostridia_UCG-014	ASV2450	0	0	0	0	0	0	0	0	0	0	20	0	0	0	0	0	0	11	0	0	0	0	0	0
d__Bacteria	k__norank_d__Bacteria	p__Bacteroidota	c__Bacteroidia	o__Bacteroidales	f__Muribaculaceae	g__norank_f__Muribaculaceae	s__uncultured_bacterium_g__norank_f__Muribaculaceae	ASV2100	2	0	9	0	0	0	0	5	5	6	6	18	7	0	7	0	9	0	0	5	0	0	7	0
d__Bacteria	k__norank_d__Bacteria	p__Firmicutes	c__Bacilli	o__Lactobacillales	f__Lactobacillaceae	g__Lactobacillus	s__unclassified_g__Lactobacillus	ASV1859	0	0	0	0	0	0	0	0	0	0	0	0	0	0	0	0	0	0	0	0	0	19	0	0
d__Bacteria	k__norank_d__Bacteria	p__Firmicutes	c__Clostridia	o__Clostridia_UCG-014	f__norank_o__Clostridia_UCG-014	g__norank_f__norank_o__Clostridia_UCG-014	s__unclassified_g__norank_f__norank_o__Clostridia_UCG-014	ASV2329	0	0	7	0	0	0	0	0	0	0	0	0	0	0	0	0	0	10	0	0	0	0	0	0
d__Bacteria	k__norank_d__Bacteria	p__Firmicutes	c__Clostridia	o__Oscillospirales	f__Ruminococcaceae	g__norank_f__Ruminococcaceae	s__unclassified_g__norank_f__Ruminococcaceae	ASV1997	0	0	0	6	0	0	0	0	0	0	0	0	0	0	0	0	0	0	0	0	0	0	0	0
d__Bacteria	k__norank_d__Bacteria	p__Bacteroidota	c__Bacteroidia	o__Bacteroidales	f__Muribaculaceae	g__norank_f__Muribaculaceae	s__unclassified_g__norank_f__Muribaculaceae	ASV2087	0	0	5	0	0	0	10	0	0	9	0	0	0	0	0	0	0	1	0	10	0	0	2	0
d__Bacteria	k__norank_d__Bacteria	p__Firmicutes	c__Bacilli	o__RF39	f__norank_o__RF39	g__norank_f__norank_o__RF39	s__uncultured_Paenibacillaceae_bacterium_g__norank	ASV2353	0	0	2	0	0	0	0	0	0	0	0	0	0	0	0	3	0	0	0	0	0	0	0	0
d__Bacteria	k__norank_d__Bacteria	p__Firmicutes	c__Bacilli	o__Lactobacillales	f__Lactobacillaceae	g__Lactobacillus	s__unclassified_g__Lactobacillus	ASV2659	0	0	0	0	0	0	0	0	0	0	0	0	0	0	0	0	0	0	0	0	41	0	0	0
d__Bacteria	k__norank_d__Bacteria	p__Firmicutes	c__Clostridia	o__Oscillospirales	f__Oscillospiraceae	g__norank_f__Oscillospiraceae	s__unclassified_g__norank_f__Oscillospiraceae	ASV2286	0	0	39	0	0	0	0	0	39	0	11	0	0	0	0	34	0	39	0	0	23	0	0	0
d__Bacteria	k__norank_d__Bacteria	p__Firmicutes	c__Clostridia	o__Christensenellales	f__Christensenellaceae	g__Christensenellaceae_R-7_group	s__uncultured_prokaryote_g__Christensenellaceae_R-7_group	ASV1581	0	0	0	0	0	0	0	0	0	0	5	4	0	0	0	0	0	0	5	0	3	0	0	0
d__Bacteria	k__norank_d__Bacteria	p__Bacteroidota	c__Bacteroidia	o__Bacteroidales	f__Muribaculaceae	g__norank_f__Muribaculaceae	s__uncultured_bacterium_g__norank_f__Muribaculaceae	ASV2045	0	36	0	0	0	0	27	0	0	94	0	0	28	0	0	0	22	0	0	0	0	0	0	0
d__Bacteria	k__norank_d__Bacteria	p__Bacteroidota	c__Bacteroidia	o__Bacteroidales	f__Muribaculaceae	g__norank_f__Muribaculaceae	s__uncultured_bacterium_g__norank_f__Muribaculaceae	ASV2041	0	0	0	2	0	7	0	0	14	3	0	0	0	4	0	10	0	30	0	0	0	0	0	0
d__Bacteria	k__norank_d__Bacteria	p__Bacteroidota	c__Bacteroidia	o__Bacteroidales	f__Muribaculaceae	g__norank_f__Muribaculaceae	s__unclassified_g__norank_f__Muribaculaceae	ASV1517	0	0	22	32	0	0	0	0	0	0	0	0	0	0	0	12	0	34	16	0	14	0	0	0
d__Bacteria	k__norank_d__Bacteria	p__Bacteroidota	c__Bacteroidia	o__Bacteroidales	f__Muribaculaceae	g__norank_f__Muribaculaceae	s__unclassified_g__norank_f__Muribaculaceae	ASV1514	0	0	9	6	0	16	0	0	0	0	0	0	4	10	8	0	0	0	21	0	0	8	0	0
d__Bacteria	k__norank_d__Bacteria	p__Firmicutes	c__Clostridia	o__Clostridia_UCG-014	f__norank_o__Clostridia_UCG-014	g__norank_f__norank_o__Clostridia_UCG-014	s__unclassified_g__norank_f__norank_o__Clostridia_UCG-014	ASV431	0	0	7	14	0	0	0	0	0	0	0	0	0	0	0	2	0	0	0	0	0	0	0	0
d__Bacteria	k__norank_d__Bacteria	p__Bacteroidota	c__Bacteroidia	o__Bacteroidales	f__Muribaculaceae	g__norank_f__Muribaculaceae	s__unclassified_g__norank_f__Muribaculaceae	ASV1518	0	0	0	0	0	0	0	0	0	0	0	0	0	15	0	46	0	0	18	0	0	0	0	0
d__Bacteria	k__norank_d__Bacteria	p__Firmicutes	c__Clostridia	o__Lachnospirales	f__Lachnospiraceae	g__unclassified_f__Lachnospiraceae	s__unclassified_f__Lachnospiraceae	ASV2993	0	0	0	0	0	0	0	0	0	0	0	0	0	0	0	0	3	0	0	0	0	0	0	0
d__Bacteria	k__norank_d__Bacteria	p__Firmicutes	c__Clostridia	o__Lachnospirales	f__Lachnospiraceae	g__Lachnospiraceae_NK4A136_group	s__unclassified_g__Lachnospiraceae_NK4A136_group	ASV663	45	0	510	171	0	39	235	0	272	0	0	0	36	290	0	39	0	52	268	0	0	82	158	43
d__Bacteria	k__norank_d__Bacteria	p__Firmicutes	c__Clostridia	o__Oscillospirales	f__Oscillospiraceae	g__norank_f__Oscillospiraceae	s__uncultured_bacterium_g__norank_f__Oscillospiraceae	ASV1536	0	0	0	0	0	0	8	8	10	0	0	0	0	0	0	0	0	0	15	0	0	0	0	0
d__Bacteria	k__norank_d__Bacteria	p__Firmicutes	c__Clostridia	o__Lachnospirales	f__Lachnospiraceae	g__Roseburia	s__unclassified_g__Roseburia	ASV1529	0	0	0	11	0	5	0	17	0	7	0	0	12	0	0	0	0	0	17	0	0	0	0	0
d__Bacteria	k__norank_d__Bacteria	p__Bacteroidota	c__Bacteroidia	o__Bacteroidales	f__Muribaculaceae	g__norank_f__Muribaculaceae	s__unclassified_g__norank_f__Muribaculaceae	ASV138	0	0	0	0	0	0	0	0	35	0	0	0	0	0	23	0	0	0	0	45	0	0	0	0
d__Bacteria	k__norank_d__Bacteria	p__Firmicutes	c__Clostridia	o__Oscillospirales	f__Ruminococcaceae	g__norank_f__Ruminococcaceae	s__unclassified_g__norank_f__Ruminococcaceae	ASV1190	0	0	0	0	15	0	0	0	0	0	0	0	0	0	0	0	0	0	0	0	0	0	0	0
d__Bacteria	k__norank_d__Bacteria	p__Firmicutes	c__Bacilli	o__Lactobacillales	f__Carnobacteriaceae	g__Jeotgalibaca	s__unclassified_g__Jeotgalibaca	ASV2510	0	0	0	0	0	0	0	0	0	0	2	0	0	0	0	0	0	0	0	0	0	0	0	0
d__Bacteria	k__norank_d__Bacteria	p__Desulfobacterota	c__Desulfovibrionia	o__Desulfovibrionales	f__Desulfovibrionaceae	g__Desulfovibrio	s__uncultured_bacterium_g__Desulfovibrio	ASV789	0	0	0	6	0	9	0	0	0	2	0	0	0	0	0	5	12	4	0	0	0	5	5	15
d__Bacteria	k__norank_d__Bacteria	p__Desulfobacterota	c__Desulfovibrionia	o__Desulfovibrionales	f__Desulfovibrionaceae	g__Desulfovibrio	s__uncultured_bacterium_g__Desulfovibrio	ASV784	20	17	0	0	0	13	0	15	0	0	0	0	0	14	0	20	27	0	0	0	0	0	0	13
d__Bacteria	k__norank_d__Bacteria	p__Firmicutes	c__Clostridia	o__Lachnospirales	f__Lachnospiraceae	g__unclassified_f__Lachnospiraceae	s__unclassified_f__Lachnospiraceae	ASV1191	0	0	0	0	13	0	0	0	0	0	0	0	0	0	0	0	0	0	0	0	0	0	0	0
d__Bacteria	k__norank_d__Bacteria	p__Firmicutes	c__Clostridia	o__Oscillospirales	f__UCG-010	g__norank_f__UCG-010	s__uncultured_organism_g__norank_f__UCG-010	ASV804	0	6	5	4	0	0	0	0	0	0	0	0	0	0	0	5	0	0	0	0	0	1	0	12
d__Bacteria	k__norank_d__Bacteria	p__Firmicutes	c__Clostridia	o__Lachnospirales	f__Lachnospiraceae	g__unclassified_f__Lachnospiraceae	s__unclassified_f__Lachnospiraceae	ASV2193	0	0	0	0	0	0	0	0	0	0	0	0	0	0	0	0	0	0	0	28	0	0	0	0
d__Bacteria	k__norank_d__Bacteria	p__Firmicutes	c__Bacilli	o__RF39	f__norank_o__RF39	g__norank_f__norank_o__RF39	s__uncultured_bacterium_g__norank_f__norank_o__RF39	ASV1079	0	0	0	0	0	0	12	0	0	0	0	0	0	0	0	0	0	0	9	0	0	0	0	0
d__Bacteria	k__norank_d__Bacteria	p__Bacteroidota	c__Bacteroidia	o__Bacteroidales	f__Rikenellaceae	g__Alistipes	s__unclassified_g__Alistipes	ASV2684	0	0	0	0	0	0	0	0	0	0	0	0	0	0	0	0	0	0	0	0	7	0	0	0
d__Bacteria	k__norank_d__Bacteria	p__Firmicutes	c__Clostridia	o__Oscillospirales	f__Ruminococcaceae	g__norank_f__Ruminococcaceae	s__unclassified_g__norank_f__Ruminococcaceae	ASV2741	0	0	0	0	0	0	0	0	0	0	0	0	0	0	0	6	0	0	0	0	0	0	4	0
d__Bacteria	k__norank_d__Bacteria	p__Firmicutes	c__Clostridia	o__Lachnospirales	f__Lachnospiraceae	g__Lachnospiraceae_UCG-001	s__uncultured_bacterium_g__Lachnospiraceae_UCG-001	ASV1822	0	0	0	0	0	0	0	0	0	0	0	0	0	0	0	0	0	0	0	0	0	40	0	0
d__Bacteria	k__norank_d__Bacteria	p__Firmicutes	c__Clostridia	o__Oscillospirales	f__Oscillospiraceae	g__norank_f__Oscillospiraceae	s__uncultured_bacterium_g__norank_f__Oscillospiraceae	ASV764	0	0	7	14	0	0	5	5	15	0	0	0	0	0	0	0	0	0	0	12	7	16	0	18
d__Bacteria	k__norank_d__Bacteria	p__Firmicutes	c__Clostridia	o__Lachnospirales	f__Lachnospiraceae	g__unclassified_f__Lachnospiraceae	s__unclassified_f__Lachnospiraceae	ASV2467	0	0	0	0	0	0	0	0	0	0	15	0	0	0	0	0	0	0	0	0	0	0	0	0
d__Bacteria	k__norank_d__Bacteria	p__Bacteroidota	c__Bacteroidia	o__Bacteroidales	f__Muribaculaceae	g__norank_f__Muribaculaceae	s__uncultured_bacterium_g__norank_f__Muribaculaceae	ASV2441	0	0	0	0	0	0	0	0	0	0	48	36	0	0	0	29	0	12	0	0	0	0	0	0
d__Bacteria	k__norank_d__Bacteria	p__Cyanobacteria	c__Vampirivibrionia	o__Gastranaerophilales	f__norank_o__Gastranaerophilales	g__norank_f__norank_o__Gastranaerophilales	s__uncultured_bacterium_g__norank_f__norank_o__Gastranaerophilales	ASV3018	0	0	0	0	0	0	0	0	0	0	0	7	0	0	0	0	0	0	0	0	0	0	0	0
d__Bacteria	k__norank_d__Bacteria	p__Bacteroidota	c__Bacteroidia	o__Bacteroidales	f__Muribaculaceae	g__norank_f__Muribaculaceae	s__unclassified_g__norank_f__Muribaculaceae	ASV3054	19	0	0	0	0	0	0	0	0	0	0	0	0	0	0	0	0	0	0	0	0	0	0	0
d__Bacteria	k__norank_d__Bacteria	p__Firmicutes	c__Clostridia	o__Lachnospirales	f__Lachnospiraceae	g__unclassified_f__Lachnospiraceae	s__unclassified_f__Lachnospiraceae	ASV1413	0	19	0	0	0	0	22	18	11	0	0	0	0	0	0	0	0	0	5	0	0	0	0	0
d__Bacteria	k__norank_d__Bacteria	p__Cyanobacteria	c__Vampirivibrionia	o__Gastranaerophilales	f__norank_o__Gastranaerophilales	g__norank_f__norank_o__Gastranaerophilales	s__uncultured_bacterium_g__norank_f__norank_o__Gastranaerophilales	ASV3011	0	0	0	0	0	0	0	0	0	0	0	16	0	0	0	0	0	0	0	0	0	0	0	0
d__Bacteria	k__norank_d__Bacteria	p__Firmicutes	c__Clostridia	o__Oscillospirales	f__Oscillospiraceae	g__UCG-007	s__uncultured_bacterium_g__UCG-007	ASV2019	0	0	0	4	0	0	0	0	0	0	0	0	0	0	0	6	0	0	0	0	0	0	0	0
d__Bacteria	k__norank_d__Bacteria	p__Firmicutes	c__Bacilli	o__RF39	f__norank_o__RF39	g__norank_f__norank_o__RF39	s__uncultured_bacterium_g__norank_f__norank_o__RF39	ASV1911	0	0	0	0	0	0	0	0	0	0	0	0	0	0	0	0	0	0	0	0	0	2	0	0
d__Bacteria	k__norank_d__Bacteria	p__Firmicutes	c__Clostridia	o__Lachnospirales	f__Lachnospiraceae	g__unclassified_f__Lachnospiraceae	s__unclassified_f__Lachnospiraceae	ASV1963	0	0	0	18	0	0	13	0	0	0	0	0	0	0	0	0	0	0	0	0	10	0	0	0
d__Bacteria	k__norank_d__Bacteria	p__Firmicutes	c__Clostridia	o__Oscillospirales	f__UCG-010	g__norank_f__UCG-010	s__unclassified_g__norank_f__UCG-010	ASV2496	0	0	0	0	0	0	0	0	0	0	4	0	0	0	0	0	0	0	0	0	0	0	0	0
d__Bacteria	k__norank_d__Bacteria	p__Bacteroidota	c__Bacteroidia	o__Bacteroidales	f__Muribaculaceae	g__norank_f__Muribaculaceae	s__uncultured_bacterium_g__norank_f__Muribaculaceae	ASV3061	6	0	0	0	0	0	0	0	0	0	0	0	0	0	0	0	0	0	0	0	0	0	0	0
d__Bacteria	k__norank_d__Bacteria	p__Firmicutes	c__Clostridia	o__Oscillospirales	f__Oscillospiraceae	g__Oscillibacter	s__uncultured_bacterium_g__Oscillibacter	ASV753	0	0	19	25	0	0	0	0	20	18	0	0	0	0	0	10	0	16	0	0	8	9	0	16
d__Bacteria	k__norank_d__Bacteria	p__Bacteroidota	c__Bacteroidia	o__Bacteroidales	f__Muribaculaceae	g__norank_f__Muribaculaceae	s__unclassified_g__norank_f__Muribaculaceae	ASV2800	0	0	0	0	0	0	16	0	0	0	0	0	0	0	18	0	0	0	0	0	0	0	27	0
d__Bacteria	k__norank_d__Bacteria	p__Cyanobacteria	c__Vampirivibrionia	o__Gastranaerophilales	f__norank_o__Gastranaerophilales	g__norank_f__norank_o__Gastranaerophilales	s__unclassified_g__norank_f__norank_o__Gastranaerophilales	ASV2412	0	0	0	0	0	0	0	0	5	0	0	16	0	0	0	0	0	0	0	0	3	0	0	0
d__Bacteria	k__norank_d__Bacteria	p__Firmicutes	c__Clostridia	o__Lachnospirales	f__Lachnospiraceae	g__unclassified_f__Lachnospiraceae	s__unclassified_f__Lachnospiraceae	ASV1569	0	0	0	0	0	0	0	5	0	0	0	0	0	0	0	0	0	0	7	0	0	0	0	0
d__Bacteria	k__norank_d__Bacteria	p__Firmicutes	c__Clostridia	o__Oscillospirales	f__Oscillospiraceae	g__Colidextribacter	s__unclassified_g__Colidextribacter	ASV2729	0	0	0	0	0	0	0	0	0	0	0	0	0	0	0	12	0	0	0	0	0	0	0	0
d__Bacteria	k__norank_d__Bacteria	p__Cyanobacteria	c__Vampirivibrionia	o__Gastranaerophilales	f__norank_o__Gastranaerophilales	g__norank_f__norank_o__Gastranaerophilales	s__unclassified_g__norank_f__norank_o__Gastranaerophilales	ASV2419	0	0	0	0	0	0	0	0	5	0	0	0	0	0	0	0	0	0	0	0	0	0	0	0
d__Bacteria	k__norank_d__Bacteria	p__Firmicutes	c__Clostridia	o__Lachnospirales	f__Lachnospiraceae	g__unclassified_f__Lachnospiraceae	s__unclassified_f__Lachnospiraceae	ASV1561	0	0	0	0	0	0	74	0	0	0	44	55	0	0	0	8	0	0	9	0	0	0	0	0
d__Bacteria	k__norank_d__Bacteria	p__Firmicutes	c__Clostridia	o__Oscillospirales	f__Oscillospiraceae	g__unclassified_f__Oscillospiraceae	s__unclassified_f__Oscillospiraceae	ASV2579	0	0	0	0	0	0	0	0	0	0	0	0	0	0	0	12	0	48	0	0	0	0	0	0
d__Bacteria	k__norank_d__Bacteria	p__Firmicutes	c__Clostridia	o__unclassified_c__Clostridia	f__unclassified_c__Clostridia	g__unclassified_c__Clostridia	s__unclassified_c__Clostridia	ASV2676	0	0	0	0	0	0	0	0	0	0	0	0	0	0	0	0	0	0	0	0	13	0	0	0
d__Bacteria	k__norank_d__Bacteria	p__Firmicutes	c__Bacilli	o__Lactobacillales	f__Lactobacillaceae	g__Lactobacillus	s__unclassified_g__Lactobacillus	ASV2889	0	157	0	0	0	0	0	0	0	0	0	0	0	0	0	0	0	0	0	0	0	0	0	0
d__Bacteria	k__norank_d__Bacteria	p__Patescibacteria	c__Saccharimonadia	o__Saccharimonadales	f__Saccharimonadaceae	g__Candidatus_Saccharimonas	s__uncultured_bacterium_g__Candidatus_Saccharimonas	ASV2212	0	0	0	0	0	0	0	0	0	0	0	0	0	0	0	0	0	0	0	10	0	0	0	0
d__Bacteria	k__norank_d__Bacteria	p__Firmicutes	c__Clostridia	o__Lachnospirales	f__Lachnospiraceae	g__unclassified_f__Lachnospiraceae	s__unclassified_f__Lachnospiraceae	ASV2736	0	0	0	0	0	0	0	12	0	0	0	0	0	0	0	7	0	0	0	0	0	0	0	0
d__Bacteria	k__norank_d__Bacteria	p__Bacteroidota	c__Bacteroidia	o__Bacteroidales	f__Muribaculaceae	g__norank_f__Muribaculaceae	s__uncultured_bacterium_g__norank_f__Muribaculaceae	ASV300	9	0	18	13	0	12	0	0	20	0	46	0	0	0	0	0	0	180	65	0	152	0	27	0
d__Bacteria	k__norank_d__Bacteria	p__Firmicutes	c__Clostridia	o__Lachnospirales	f__Lachnospiraceae	g__unclassified_f__Lachnospiraceae	s__unclassified_f__Lachnospiraceae	ASV2734	0	0	0	0	0	0	0	0	0	0	0	0	0	0	0	6	0	0	0	0	0	0	0	0
d__Bacteria	k__norank_d__Bacteria	p__Firmicutes	c__Clostridia	o__Lachnospirales	f__Lachnospiraceae	g__unclassified_f__Lachnospiraceae	s__unclassified_f__Lachnospiraceae	ASV603	0	0	0	0	0	0	0	0	0	0	2	0	0	0	0	0	0	0	19	0	0	0	4	0
d__Bacteria	k__norank_d__Bacteria	p__Firmicutes	c__Clostridia	o__Lachnospirales	f__Lachnospiraceae	g__Lachnospiraceae_NK4A136_group	s__unclassified_g__Lachnospiraceae_NK4A136_group	ASV892	0	10	5	0	0	0	0	16	0	8	0	0	0	0	0	0	0	15	0	0	0	0	8	5
d__Bacteria	k__norank_d__Bacteria	p__Firmicutes	c__Clostridia	o__Lachnospirales	f__Lachnospiraceae	g__unclassified_f__Lachnospiraceae	s__unclassified_f__Lachnospiraceae	ASV604	0	0	8	0	0	0	0	0	0	0	0	0	0	0	0	0	0	30	0	0	0	0	0	0
d__Bacteria	k__norank_d__Bacteria	p__Firmicutes	c__Clostridia	o__Oscillospirales	f__Butyricicoccaceae	g__Butyricicoccus	s__uncultured_bacterium_g__Butyricicoccus	ASV2276	0	0	0	0	0	0	0	0	0	0	0	0	0	4	0	0	0	0	0	0	0	0	0	0
d__Bacteria	k__norank_d__Bacteria	p__Firmicutes	c__Clostridia	o__Clostridia_vadinBB60_group	f__norank_o__Clostridia_vadinBB60_group	g__norank_f__norank_o__Clostridia_vadinBB60_group	s__unclassified_g__norank_f__norank_o__Clostridia_vadinBB60_group	ASV3067	2	0	0	0	0	0	0	0	0	0	0	0	0	0	0	0	0	0	0	0	0	0	0	0
d__Bacteria	k__norank_d__Bacteria	p__Bacteroidota	c__Bacteroidia	o__Bacteroidales	f__Muribaculaceae	g__norank_f__Muribaculaceae	s__uncultured_bacterium_g__norank_f__Muribaculaceae	ASV2666	0	0	0	0	0	0	0	0	0	0	0	0	0	0	0	0	0	0	0	0	32	0	0	0
d__Bacteria	k__norank_d__Bacteria	p__Firmicutes	c__Clostridia	o__Oscillospirales	f__Ruminococcaceae	g__Ruminococcus	s__unclassified_g__Ruminococcus	ASV2561	0	0	0	0	0	0	0	0	0	0	0	71	0	0	0	0	0	6	0	0	109	0	0	0
d__Bacteria	k__norank_d__Bacteria	p__Firmicutes	c__Clostridia	o__Oscillospirales	f__Oscillospiraceae	g__NK4A214_group	s__unclassified_g__NK4A214_group	ASV2688	0	0	0	0	0	0	0	0	0	0	0	17	0	0	9	0	0	13	0	0	4	0	0	0
d__Bacteria	k__norank_d__Bacteria	p__Bacteroidota	c__Bacteroidia	o__Bacteroidales	f__Muribaculaceae	g__norank_f__Muribaculaceae	s__uncultured_bacterium_g__norank_f__Muribaculaceae	ASV549	966	28	0	48	24	0	0	21	19	77	39	0	0	158	0	0	0	0	54	0	3	53	61	130
d__Bacteria	k__norank_d__Bacteria	p__Firmicutes	c__Clostridia	o__Lachnospirales	f__Lachnospiraceae	g__Roseburia	s__uncultured_bacterium_g__Roseburia	ASV1930	0	0	0	39	0	0	0	0	0	0	0	0	0	0	0	0	0	0	0	0	0	0	0	0
d__Bacteria	k__norank_d__Bacteria	p__Firmicutes	c__Bacilli	o__RF39	f__norank_o__RF39	g__norank_f__norank_o__RF39	s__unclassified_g__norank_f__norank_o__RF39	ASV1913	3	0	0	0	0	0	0	0	0	0	3	0	0	0	0	0	0	0	0	0	0	2	0	0
d__Bacteria	k__norank_d__Bacteria	p__Firmicutes	c__Clostridia	o__Oscillospirales	f__Ruminococcaceae	g__unclassified_f__Ruminococcaceae	s__unclassified_f__Ruminococcaceae	ASV2682	0	0	0	0	0	0	0	0	0	0	0	0	0	0	0	0	0	0	0	0	9	0	0	0
d__Bacteria	k__norank_d__Bacteria	p__Firmicutes	c__Clostridia	o__Oscillospirales	f__Ruminococcaceae	g__Candidatus_Soleaferrea	s__uncultured_bacterium_g__Candidatus_Soleaferrea	ASV1906	0	1	0	0	0	0	0	3	0	0	0	0	0	0	0	0	0	10	0	0	0	3	0	0
d__Bacteria	k__norank_d__Bacteria	p__Firmicutes	c__Clostridia	o__Lachnospirales	f__Lachnospiraceae	g__unclassified_f__Lachnospiraceae	s__unclassified_f__Lachnospiraceae	ASV2280	0	0	65	0	0	0	0	0	0	0	0	0	0	0	0	0	0	0	0	0	0	0	0	0
d__Bacteria	k__norank_d__Bacteria	p__Firmicutes	c__Clostridia	o__Lachnospirales	f__Lachnospiraceae	g__unclassified_f__Lachnospiraceae	s__unclassified_f__Lachnospiraceae	ASV2281	0	0	60	0	0	0	0	0	0	0	52	0	0	0	0	0	0	0	0	0	0	0	0	0
d__Bacteria	k__norank_d__Bacteria	p__Firmicutes	c__Clostridia	o__Lachnospirales	f__Lachnospiraceae	g__unclassified_f__Lachnospiraceae	s__unclassified_f__Lachnospiraceae	ASV3023	0	0	0	0	0	0	0	0	0	0	0	4	0	0	0	0	0	0	0	0	0	0	0	0
d__Bacteria	k__norank_d__Bacteria	p__Firmicutes	c__Clostridia	o__Lachnospirales	f__Lachnospiraceae	g__unclassified_f__Lachnospiraceae	s__unclassified_f__Lachnospiraceae	ASV2289	0	0	36	0	0	4	0	10	10	0	0	0	0	0	0	0	0	0	0	0	0	0	0	0
d__Bacteria	k__norank_d__Bacteria	p__Bacteroidota	c__Bacteroidia	o__Bacteroidales	f__Muribaculaceae	g__norank_f__Muribaculaceae	s__uncultured_bacterium_g__norank_f__Muribaculaceae	ASV3087	0	0	0	0	0	0	10	0	0	0	0	0	0	0	0	0	0	0	0	0	0	0	0	0
d__Bacteria	k__norank_d__Bacteria	p__Firmicutes	c__Clostridia	o__Lachnospirales	f__Lachnospiraceae	g__unclassified_f__Lachnospiraceae	s__unclassified_f__Lachnospiraceae	ASV2046	0	0	40	0	0	0	0	0	0	87	0	0	0	0	0	0	0	0	0	0	0	0	0	0
d__Bacteria	k__norank_d__Bacteria	p__Firmicutes	c__Clostridia	o__Lachnospirales	f__Lachnospiraceae	g__unclassified_f__Lachnospiraceae	s__unclassified_f__Lachnospiraceae	ASV2047	0	9	0	0	0	0	0	21	0	84	0	0	27	0	0	0	0	0	0	0	0	0	0	0
d__Bacteria	k__norank_d__Bacteria	p__Firmicutes	c__Clostridia	o__Lachnospirales	f__Lachnospiraceae	g__unclassified_f__Lachnospiraceae	s__unclassified_f__Lachnospiraceae	ASV2517	0	0	0	0	0	53	0	0	0	0	0	0	0	0	0	0	0	0	0	0	0	0	0	0
d__Bacteria	k__norank_d__Bacteria	p__Firmicutes	c__Clostridia	o__Lachnospirales	f__Lachnospiraceae	g__unclassified_f__Lachnospiraceae	s__unclassified_f__Lachnospiraceae	ASV2043	0	0	0	0	0	0	0	0	0	135	0	0	0	0	0	0	0	0	0	0	0	0	0	0
d__Bacteria	k__norank_d__Bacteria	p__Firmicutes	c__Clostridia	o__Lachnospirales	f__Lachnospiraceae	g__unclassified_f__Lachnospiraceae	s__unclassified_f__Lachnospiraceae	ASV2519	0	0	0	0	0	25	0	0	0	0	0	0	0	0	0	0	0	0	0	0	0	0	0	0
d__Bacteria	k__norank_d__Bacteria	p__Firmicutes	c__Clostridia	o__Oscillospirales	f__Ruminococcaceae	g__unclassified_f__Ruminococcaceae	s__unclassified_f__Ruminococcaceae	ASV1588	0	0	4	2	0	0	6	0	0	0	0	0	0	0	0	0	4	3	4	0	0	3	0	0
d__Bacteria	k__norank_d__Bacteria	p__Bacteroidota	c__Bacteroidia	o__Bacteroidales	f__Muribaculaceae	g__norank_f__Muribaculaceae	s__uncultured_bacterium_g__norank_f__Muribaculaceae	ASV434	38	23	0	15	15	9	11	32	33	10	0	0	8	0	11	0	25	15	65	22	19	0	0	12
d__Bacteria	k__norank_d__Bacteria	p__Firmicutes	c__Clostridia	o__Oscillospirales	f__Oscillospiraceae	g__norank_f__Oscillospiraceae	s__unclassified_g__norank_f__Oscillospiraceae	ASV2523	0	0	0	0	0	24	0	0	0	0	0	0	0	0	0	0	0	0	0	0	0	0	0	0
d__Bacteria	k__norank_d__Bacteria	p__Bacteroidota	c__Bacteroidia	o__Bacteroidales	f__Muribaculaceae	g__norank_f__Muribaculaceae	s__unclassified_g__norank_f__Muribaculaceae	ASV1572	0	0	0	27	0	34	0	0	0	0	35	0	0	0	0	40	0	65	4	0	17	0	0	0
d__Bacteria	k__norank_d__Bacteria	p__Firmicutes	c__Clostridia	o__Clostridia_UCG-014	f__norank_o__Clostridia_UCG-014	g__norank_f__norank_o__Clostridia_UCG-014	s__unclassified_g__norank_f__norank_o__Clostridia_UCG-014	ASV2027	0	0	0	3	0	0	0	0	0	0	0	0	0	0	0	0	0	0	0	0	0	0	0	0
d__Bacteria	k__norank_d__Bacteria	p__Firmicutes	c__Bacilli	o__Bacillales	f__Bacillaceae	g__Bacillus	s__Lactobacillus_vaginalis_g__Bacillus	ASV1170	0	0	0	0	25	0	0	0	0	0	0	0	25	0	17	0	0	0	0	0	0	0	0	0
d__Bacteria	k__norank_d__Bacteria	p__Patescibacteria	c__Saccharimonadia	o__Saccharimonadales	f__Saccharimonadaceae	g__Candidatus_Saccharimonas	s__uncultured_bacterium_g__Candidatus_Saccharimonas	ASV2497	0	0	0	0	0	0	0	0	0	0	5	0	0	0	0	0	0	0	0	0	0	0	0	0
d__Bacteria	k__norank_d__Bacteria	p__Firmicutes	c__Clostridia	o__Clostridia_UCG-014	f__norank_o__Clostridia_UCG-014	g__norank_f__norank_o__Clostridia_UCG-014	s__unclassified_g__norank_f__norank_o__Clostridia_UCG-014	ASV3003	0	0	0	0	0	0	0	0	0	0	0	48	0	0	0	0	0	0	0	0	0	0	0	0
d__Bacteria	k__norank_d__Bacteria	p__Firmicutes	c__Clostridia	o__Lachnospirales	f__Lachnospiraceae	g__Lachnospiraceae_NK4A136_group	s__unclassified_g__Lachnospiraceae_NK4A136_group	ASV675	0	0	44	183	0	0	86	0	12	0	0	0	40	159	0	38	35	18	136	0	7	236	72	32
d__Bacteria	k__norank_d__Bacteria	p__Firmicutes	c__Bacilli	o__RF39	f__norank_o__RF39	g__norank_f__norank_o__RF39	s__uncultured_Lachnospiraceae_bacterium_g__norank_f__norank	ASV261	3	0	0	0	0	0	0	0	0	0	12	0	0	7	0	8	0	0	9	33	20	0	2	0
d__Bacteria	k__norank_d__Bacteria	p__Bacteroidota	c__Bacteroidia	o__Bacteroidales	f__Bacteroidaceae	g__Bacteroides	s__unclassified_g__Bacteroides	ASV2427	0	0	0	0	0	0	0	0	0	0	0	0	0	0	0	0	0	5	0	0	0	0	0	0
d__Bacteria	k__norank_d__Bacteria	p__Firmicutes	c__Clostridia	o__Lachnospirales	f__Lachnospiraceae	g__unclassified_f__Lachnospiraceae	s__unclassified_f__Lachnospiraceae	ASV2981	0	0	0	0	0	0	0	0	0	0	0	0	0	0	0	0	10	0	0	0	0	0	0	0
d__Bacteria	k__norank_d__Bacteria	p__Firmicutes	c__Clostridia	o__Lachnospirales	f__Lachnospiraceae	g__unclassified_f__Lachnospiraceae	s__unclassified_f__Lachnospiraceae	ASV2980	0	0	0	0	0	0	0	0	0	0	0	0	0	0	0	0	9	0	0	0	0	0	0	0
d__Bacteria	k__norank_d__Bacteria	p__Bacteroidota	c__Bacteroidia	o__Bacteroidales	f__Muribaculaceae	g__norank_f__Muribaculaceae	s__uncultured_bacterium_g__norank_f__Muribaculaceae	ASV2059	0	20	0	0	0	0	0	0	0	30	28	0	0	0	0	0	0	0	0	0	0	0	0	0
d__Bacteria	k__norank_d__Bacteria	p__Firmicutes	c__Clostridia	o__Lachnospirales	f__Lachnospiraceae	g__unclassified_f__Lachnospiraceae	s__unclassified_f__Lachnospiraceae	ASV2987	0	0	0	0	0	0	0	0	0	0	0	0	0	0	0	0	6	0	0	0	0	0	0	0
d__Bacteria	k__norank_d__Bacteria	p__Bacteroidota	c__Bacteroidia	o__Bacteroidales	f__Muribaculaceae	g__norank_f__Muribaculaceae	s__uncultured_bacterium_g__norank_f__Muribaculaceae	ASV2053	0	0	0	0	0	0	0	0	0	48	0	0	0	0	0	0	0	0	0	0	0	0	0	0
d__Bacteria	k__norank_d__Bacteria	p__Firmicutes	c__Clostridia	o__Lachnospirales	f__Lachnospiraceae	g__Eubacterium_xylanophilum_group	s__unclassified_g__Eubacterium_xylanophilum_group	ASV1609	0	0	0	6	0	138	0	0	0	0	0	0	42	0	0	0	18	22	0	0	0	89	71	0
d__Bacteria	k__norank_d__Bacteria	p__Bacteroidota	c__Bacteroidia	o__Bacteroidales	f__Muribaculaceae	g__norank_f__Muribaculaceae	s__uncultured_bacterium_g__norank_f__Muribaculaceae	ASV2051	0	0	0	0	0	0	0	0	0	52	0	0	0	0	0	0	0	0	0	0	0	0	21	0
d__Bacteria	k__norank_d__Bacteria	p__Bacteroidota	c__Bacteroidia	o__Bacteroidales	f__Muribaculaceae	g__norank_f__Muribaculaceae	s__uncultured_bacterium_g__norank_f__Muribaculaceae	ASV2054	0	0	0	0	0	0	0	29	0	41	0	0	9	0	0	0	0	0	0	0	0	0	0	0
d__Bacteria	k__norank_d__Bacteria	p__Bacteroidota	c__Bacteroidia	o__Bacteroidales	f__Muribaculaceae	g__norank_f__Muribaculaceae	s__uncultured_bacterium_g__norank_f__Muribaculaceae	ASV2055	0	0	0	0	0	93	0	0	0	43	0	0	0	0	0	0	0	0	0	0	0	0	0	0
d__Bacteria	k__norank_d__Bacteria	p__Desulfobacterota	c__Desulfovibrionia	o__Desulfovibrionales	f__Desulfovibrionaceae	g__Desulfovibrio	s__uncultured_bacterium_g__Desulfovibrio	ASV798	0	13	0	0	8	0	10	0	0	0	0	0	11	0	0	27	33	0	0	0	0	0	0	9
d__Bacteria	k__norank_d__Bacteria	p__Bacteroidota	c__Bacteroidia	o__Bacteroidales	f__Muribaculaceae	g__norank_f__Muribaculaceae	s__unclassified_g__norank_f__Muribaculaceae	ASV1163	0	21	0	19	32	22	12	0	0	27	101	15	0	31	0	0	0	47	19	0	78	60	11	0
d__Bacteria	k__norank_d__Bacteria	p__Bacteroidota	c__Bacteroidia	o__Bacteroidales	f__Muribaculaceae	g__norank_f__Muribaculaceae	s__unclassified_g__norank_f__Muribaculaceae	ASV1162	0	0	0	0	29	0	0	0	0	0	0	0	0	0	0	0	0	0	0	0	0	0	0	0
d__Bacteria	k__norank_d__Bacteria	p__Bacteroidota	c__Bacteroidia	o__Bacteroidales	f__Muribaculaceae	g__norank_f__Muribaculaceae	s__unclassified_g__norank_f__Muribaculaceae	ASV1161	0	0	0	22	30	12	0	0	0	0	0	28	0	0	17	23	0	0	0	0	0	18	0	0
d__Bacteria	k__norank_d__Bacteria	p__Bacteroidota	c__Bacteroidia	o__Bacteroidales	f__Muribaculaceae	g__norank_f__Muribaculaceae	s__unclassified_g__norank_f__Muribaculaceae	ASV1160	0	0	29	0	35	0	26	0	0	0	0	0	34	0	36	0	0	0	0	0	0	0	0	0
d__Bacteria	k__norank_d__Bacteria	p__Firmicutes	c__Clostridia	o__Oscillospirales	f__Oscillospiraceae	g__NK4A214_group	s__unclassified_g__NK4A214_group	ASV2513	0	0	0	0	0	0	0	0	0	0	2	0	0	0	0	0	0	0	0	0	0	0	0	0
d__Bacteria	k__norank_d__Bacteria	p__Bacteroidota	c__Bacteroidia	o__Bacteroidales	f__Prevotellaceae	g__Prevotellaceae_NK3B31_group	s__uncultured_bacterium_g__Prevotellaceae_NK3B31_group	ASV1220	69	7	0	0	5	38	0	19	7	0	0	0	15	0	3	0	21	0	0	25	8	31	0	0
d__Bacteria	k__norank_d__Bacteria	p__Firmicutes	c__Clostridia	o__Lachnospirales	f__Lachnospiraceae	g__unclassified_f__Lachnospiraceae	s__unclassified_f__Lachnospiraceae	ASV2875	0	0	0	0	0	0	0	0	0	0	0	0	0	0	0	0	0	3	0	0	0	0	0	0
d__Bacteria	k__norank_d__Bacteria	p__Firmicutes	c__Clostridia	o__Oscillospirales	f__Ruminococcaceae	g__norank_f__Ruminococcaceae	s__unclassified_g__norank_f__Ruminococcaceae	ASV836	9	14	0	0	0	3	7	12	0	14	0	4	11	0	10	14	8	2	0	0	4	0	5	8
d__Bacteria	k__norank_d__Bacteria	p__Firmicutes	c__Clostridia	o__Lachnospirales	f__Lachnospiraceae	g__Eubacterium_xylanophilum_group	s__uncultured_bacterium_g__Eubacterium_xylanophilum_group	ASV1823	0	0	0	0	0	20	0	0	0	20	0	0	0	33	83	26	71	0	0	0	0	37	0	0
d__Bacteria	k__norank_d__Bacteria	p__Actinobacteriota	c__Actinobacteria	o__Bifidobacteriales	f__Bifidobacteriaceae	g__Bifidobacterium	s__unclassified_g__Bifidobacterium	ASV619	0	65	26	128	145	246	27	62	0	26	0	14	94	304	43	45	0	0	0	0	218	40	0	201
d__Bacteria	k__norank_d__Bacteria	p__Firmicutes	c__Clostridia	o__Oscillospirales	f__Ruminococcaceae	g__unclassified_f__Ruminococcaceae	s__unclassified_f__Ruminococcaceae	ASV2285	0	0	37	0	0	0	29	0	0	0	0	0	0	0	14	0	0	0	0	0	0	0	0	0
d__Bacteria	k__norank_d__Bacteria	p__Bacteroidota	c__Bacteroidia	o__Bacteroidales	f__Rikenellaceae	g__Rikenellaceae_RC9_gut_group	s__uncultured_bacterium_g__Rikenellaceae_RC9_gut_group	ASV2850	0	0	0	0	0	0	0	0	0	0	0	0	0	0	2	0	0	0	0	0	0	0	0	0
d__Bacteria	k__norank_d__Bacteria	p__Firmicutes	c__Clostridia	o__Oscillospirales	f__Oscillospiraceae	g__unclassified_f__Oscillospiraceae	s__unclassified_f__Oscillospiraceae	ASV463	10	5	21	13	0	14	22	13	0	23	7	9	16	0	14	11	14	9	0	27	24	0	7	13
d__Bacteria	k__norank_d__Bacteria	p__Firmicutes	c__Clostridia	o__Oscillospirales	f__Oscillospiraceae	g__Oscillibacter	s__Oscillibacter_sp._1-3	ASV3012	0	0	0	0	0	0	18	0	0	0	0	15	0	0	0	0	0	0	0	0	0	0	0	0
d__Bacteria	k__norank_d__Bacteria	p__Firmicutes	c__Clostridia	o__Clostridia_UCG-014	f__norank_o__Clostridia_UCG-014	g__norank_f__norank_o__Clostridia_UCG-014	s__unclassified_g__norank_f__norank_o__Clostridia_UCG-014	ASV2205	0	0	0	0	0	0	0	0	0	0	0	0	0	0	0	0	0	0	0	18	0	0	0	0
d__Bacteria	k__norank_d__Bacteria	p__Firmicutes	c__Clostridia	o__Clostridia_UCG-014	f__norank_o__Clostridia_UCG-014	g__norank_f__norank_o__Clostridia_UCG-014	s__unclassified_g__norank_f__norank_o__Clostridia_UCG-014	ASV2206	0	0	0	0	0	0	0	0	0	0	0	0	0	0	0	0	0	0	0	17	0	0	0	0
d__Bacteria	k__norank_d__Bacteria	p__Firmicutes	c__Clostridia	o__Oscillospirales	f__Oscillospiraceae	g__unclassified_f__Oscillospiraceae	s__unclassified_f__Oscillospiraceae	ASV1194	0	0	0	0	15	0	0	0	0	0	0	0	0	0	0	0	0	0	0	0	0	0	0	0
d__Bacteria	k__norank_d__Bacteria	p__Firmicutes	c__Clostridia	o__Lachnospirales	f__Lachnospiraceae	g__GCA-900066575	s__uncultured_bacterium_g__GCA-900066575	ASV2481	0	0	0	0	0	0	0	0	0	0	5	0	0	0	0	0	0	0	0	0	0	0	0	0
d__Bacteria	k__norank_d__Bacteria	p__Firmicutes	c__Clostridia	o__Oscillospirales	f__Oscillospiraceae	g__unclassified_f__Oscillospiraceae	s__unclassified_f__Oscillospiraceae	ASV1980	0	0	8	8	0	0	0	0	0	0	0	0	0	0	0	0	0	0	0	0	0	0	0	0
d__Bacteria	k__norank_d__Bacteria	p__Firmicutes	c__Clostridia	o__Lachnospirales	f__Lachnospiraceae	g__Tyzzerella	s__unclassified_g__Tyzzerella	ASV2774	0	3	0	0	0	0	0	8	0	0	0	0	0	0	0	0	0	0	0	0	0	0	0	0
d__Bacteria	k__norank_d__Bacteria	p__Firmicutes	c__Clostridia	o__Oscillospirales	f__Oscillospiraceae	g__unclassified_f__Oscillospiraceae	s__unclassified_f__Oscillospiraceae	ASV664	0	44	22	21	0	19	28	17	17	0	30	0	6	0	12	22	29	32	0	11	0	18	28	38
d__Bacteria	k__norank_d__Bacteria	p__Firmicutes	c__Clostridia	o__Christensenellales	f__Christensenellaceae	g__norank_f__Christensenellaceae	s__uncultured_bacterium_g__norank_f__Christensenellaceae	ASV2818	0	0	0	0	0	0	0	0	0	0	0	0	0	0	0	0	0	0	0	0	0	0	2	0
d__Bacteria	k__norank_d__Bacteria	p__Firmicutes	c__Clostridia	o__Lachnospirales	f__Lachnospiraceae	g__Lachnospiraceae_NK4A136_group	s__unclassified_g__Lachnospiraceae_NK4A136_group	ASV1525	0	0	0	0	0	0	0	0	0	0	0	0	0	0	0	0	0	0	21	0	0	0	0	0
d__Bacteria	k__norank_d__Bacteria	p__Firmicutes	c__Clostridia	o__Oscillospirales	f__Oscillospiraceae	g__norank_f__Oscillospiraceae	s__uncultured_bacterium_g__norank_f__Oscillospiraceae	ASV184	0	12	51	23	0	0	18	23	0	18	9	0	15	0	0	12	22	25	29	0	19	8	0	39
d__Bacteria	k__norank_d__Bacteria	p__Firmicutes	c__Bacilli	o__Lactobacillales	f__Lactobacillaceae	g__Lactobacillus	s__unclassified_g__Lactobacillus	ASV2409	0	0	0	0	0	0	0	0	4	0	0	0	0	0	0	0	0	0	0	0	0	0	0	0
d__Bacteria	k__norank_d__Bacteria	p__Firmicutes	c__Clostridia	o__Oscillospirales	f__norank_o__Oscillospirales	g__norank_f__norank_o__Oscillospirales	s__unclassified_g__norank_f__norank_o__Oscillospirales	ASV370	0	4	5	3	0	0	1	3	0	4	2	0	0	0	0	0	0	2	0	0	3	0	1	0
d__Bacteria	k__norank_d__Bacteria	p__Firmicutes	c__Clostridia	o__Lachnospirales	f__Lachnospiraceae	g__unclassified_f__Lachnospiraceae	s__unclassified_f__Lachnospiraceae	ASV1983	0	0	0	10	0	0	0	0	0	0	0	0	0	0	0	0	0	0	0	0	0	0	4	0
d__Bacteria	k__norank_d__Bacteria	p__Firmicutes	c__Clostridia	o__Monoglobales	f__Monoglobaceae	g__Monoglobus	s__unclassified_g__Monoglobus	ASV1728	0	0	0	0	0	4	0	0	0	0	0	0	0	6	0	6	0	0	0	0	0	0	0	0
d__Bacteria	k__norank_d__Bacteria	p__Bacteroidota	c__Bacteroidia	o__Bacteroidales	f__Muribaculaceae	g__norank_f__Muribaculaceae	s__uncultured_bacterium_g__norank_f__Muribaculaceae	ASV1936	0	0	0	28	0	0	0	0	0	0	0	0	9	0	0	0	21	0	0	63	28	0	21	0
d__Bacteria	k__norank_d__Bacteria	p__Bacteroidota	c__Bacteroidia	o__Bacteroidales	f__Muribaculaceae	g__norank_f__Muribaculaceae	s__uncultured_bacterium_g__norank_f__Muribaculaceae	ASV937	0	0	4	0	0	0	0	0	0	0	0	0	0	0	0	0	12	0	0	0	0	0	0	0
d__Bacteria	k__norank_d__Bacteria	p__Bacteroidota	c__Bacteroidia	o__Bacteroidales	f__Muribaculaceae	g__norank_f__Muribaculaceae	s__uncultured_bacterium_g__norank_f__Muribaculaceae	ASV931	118	0	0	0	0	0	0	0	26	0	0	0	4	29	21	0	0	0	0	0	0	0	0	0
d__Bacteria	k__norank_d__Bacteria	p__Desulfobacterota	c__Desulfovibrionia	o__Desulfovibrionales	f__Desulfovibrionaceae	g__Desulfovibrio	s__unclassified_g__Desulfovibrio	ASV1437	0	7	0	0	0	8	0	0	0	0	0	0	0	0	0	0	6	0	0	0	0	0	18	0
d__Bacteria	k__norank_d__Bacteria	p__Firmicutes	c__Clostridia	o__Clostridia_UCG-014	f__norank_o__Clostridia_UCG-014	g__norank_f__norank_o__Clostridia_UCG-014	s__unclassified_g__norank_f__norank_o__Clostridia_UCG-014	ASV1153	0	0	0	0	40	0	60	0	0	0	0	0	18	0	0	0	31	0	0	26	38	0	0	0
d__Bacteria	k__norank_d__Bacteria	p__Firmicutes	c__Clostridia	o__Lachnospirales	f__Lachnospiraceae	g__Tuzzerella	s__uncultured_bacterium_g__Tuzzerella	ASV271	7	0	28	21	0	7	20	22	7	2	16	7	10	6	18	28	27	29	12	0	11	13	6	12
d__Bacteria	k__norank_d__Bacteria	p__Bacteroidota	c__Bacteroidia	o__Bacteroidales	f__Muribaculaceae	g__norank_f__Muribaculaceae	s__uncultured_bacterium_g__norank_f__Muribaculaceae	ASV841	0	0	0	0	0	0	0	0	0	0	0	0	0	0	0	0	0	0	0	11	0	0	0	8
d__Bacteria	k__norank_d__Bacteria	p__Bacteroidota	c__Bacteroidia	o__Bacteroidales	f__Muribaculaceae	g__norank_f__Muribaculaceae	s__uncultured_bacterium_g__norank_f__Muribaculaceae	ASV844	0	0	0	0	0	0	0	5	0	0	0	0	0	0	0	0	0	0	0	8	0	10	0	8
d__Bacteria	k__norank_d__Bacteria	p__Firmicutes	c__Bacilli	o__RF39	f__norank_o__RF39	g__norank_f__norank_o__RF39	s__metagenome_g__norank_f__norank_o__RF39	ASV2318	0	0	14	0	0	0	0	0	0	0	0	0	0	0	0	0	0	0	0	0	0	0	0	0
d__Bacteria	k__norank_d__Bacteria	p__Firmicutes	c__Bacilli	o__RF39	f__norank_o__RF39	g__norank_f__norank_o__RF39	s__uncultured_bacterium_g__norank_f__norank_o__RF39	ASV2751	0	0	0	0	0	0	0	0	0	0	0	0	0	0	0	1	0	0	0	0	0	0	0	0
d__Bacteria	k__norank_d__Bacteria	p__Firmicutes	c__Bacilli	o__Lactobacillales	f__Lactobacillaceae	g__Lactobacillus	s__unclassified_g__Lactobacillus	ASV2246	0	0	0	0	0	0	0	0	0	0	0	0	79	39	0	0	63	0	0	0	0	0	0	0
d__Bacteria	k__norank_d__Bacteria	p__Firmicutes	c__Bacilli	o__Lactobacillales	f__Lactobacillaceae	g__Lactobacillus	s__unclassified_g__Lactobacillus	ASV2245	0	0	0	0	0	0	0	0	0	0	0	0	0	42	0	0	0	0	0	0	0	0	0	0
d__Bacteria	k__norank_d__Bacteria	p__Firmicutes	c__Bacilli	o__Lactobacillales	f__Lactobacillaceae	g__Lactobacillus	s__unclassified_g__Lactobacillus	ASV2244	0	0	0	0	0	0	0	0	0	0	0	0	0	0	0	0	0	0	0	2	0	0	0	0
d__Bacteria	k__norank_d__Bacteria	p__Firmicutes	c__Clostridia	o__Peptostreptococcales-Tissierellales	f__unclassified_o__Peptostreptococcales-Tissierellales	g__unclassified_o__Peptostreptococcales-Tissierellales	s__unclassified_o__Peptostreptococcales-Tissierellales	ASV2746	0	0	0	0	0	0	0	0	0	0	0	0	0	0	0	3	0	0	0	0	0	0	0	0
d__Bacteria	k__norank_d__Bacteria	p__Firmicutes	c__Bacilli	o__unclassified_c__Bacilli	f__unclassified_c__Bacilli	g__unclassified_c__Bacilli	s__unclassified_c__Bacilli	ASV3077	0	0	0	0	0	0	20	0	0	0	0	0	0	0	0	0	0	0	0	0	0	0	0	0
d__Bacteria	k__norank_d__Bacteria	p__Firmicutes	c__Clostridia	o__Lachnospirales	f__Lachnospiraceae	g__unclassified_f__Lachnospiraceae	s__unclassified_f__Lachnospiraceae	ASV1883	0	0	0	7	0	0	0	0	0	0	0	0	0	0	0	0	0	15	0	0	11	9	0	0
d__Bacteria	k__norank_d__Bacteria	p__Bacteroidota	c__Bacteroidia	o__Bacteroidales	f__Muribaculaceae	g__norank_f__Muribaculaceae	s__uncultured_bacterium_g__norank_f__Muribaculaceae	ASV1166	0	92	34	46	28	62	41	0	81	0	0	61	25	30	15	68	30	32	20	45	71	0	0	0
d__Bacteria	k__norank_d__Bacteria	p__Firmicutes	c__Clostridia	o__Lachnospirales	f__Lachnospiraceae	g__unclassified_f__Lachnospiraceae	s__unclassified_f__Lachnospiraceae	ASV1550	0	0	0	0	0	0	0	0	0	0	0	0	0	0	0	0	0	0	12	0	0	0	0	0
d__Bacteria	k__norank_d__Bacteria	p__Firmicutes	c__Clostridia	o__Clostridia_UCG-014	f__norank_o__Clostridia_UCG-014	g__norank_f__norank_o__Clostridia_UCG-014	s__unclassified_g__norank_f__norank_o__Clostridia_UCG-014	ASV1937	0	0	0	28	0	0	0	0	0	0	0	0	0	0	0	29	0	0	0	0	0	0	0	0
d__Bacteria	k__norank_d__Bacteria	p__Firmicutes	c__Clostridia	o__Oscillospirales	f__Ruminococcaceae	g__Ruminococcus	s__unclassified_g__Ruminococcus	ASV2354	0	0	3	0	0	0	0	0	0	0	0	0	0	0	0	0	0	0	0	0	0	0	0	0
d__Bacteria	k__norank_d__Bacteria	p__unclassified_k__norank_d__Bacteria	c__unclassified_k__norank_d__Bacteria	o__unclassified_k__norank_d__Bacteria	f__unclassified_k__norank_d__Bacteria	g__unclassified_k__norank_d__Bacteria	s__unclassified_k__norank_d__Bacteria	ASV3028	0	0	0	0	0	0	0	0	0	0	0	2	0	0	0	0	0	0	0	0	0	0	0	0
d__Bacteria	k__norank_d__Bacteria	p__Firmicutes	c__Clostridia	o__Lachnospirales	f__Lachnospiraceae	g__unclassified_f__Lachnospiraceae	s__unclassified_f__Lachnospiraceae	ASV2297	0	0	20	0	0	0	0	0	0	0	0	0	0	0	0	0	0	0	0	0	0	0	0	0
d__Bacteria	k__norank_d__Bacteria	p__Firmicutes	c__Clostridia	o__Clostridia_UCG-014	f__norank_o__Clostridia_UCG-014	g__norank_f__norank_o__Clostridia_UCG-014	s__unclassified_g__norank_f__norank_o__Clostridia_UCG-014	ASV1900	0	0	0	0	0	0	0	0	0	0	0	0	0	0	0	0	0	0	0	0	0	5	0	0
d__Bacteria	k__norank_d__Bacteria	p__Bacteroidota	c__Bacteroidia	o__Bacteroidales	f__Prevotellaceae	g__Prevotellaceae_NK3B31_group	s__uncultured_bacterium_g__Prevotellaceae_NK3B31_group	ASV734	146	0	0	0	0	0	0	0	0	19	0	0	0	21	0	11	0	18	0	46	0	11	0	21
d__Bacteria	k__norank_d__Bacteria	p__Firmicutes	c__Clostridia	o__Lachnospirales	f__Lachnospiraceae	g__unclassified_f__Lachnospiraceae	s__unclassified_f__Lachnospiraceae	ASV2299	0	0	21	0	0	0	0	0	0	0	0	0	0	0	0	0	0	0	0	0	0	0	0	0
d__Bacteria	k__norank_d__Bacteria	p__Bacteroidota	c__Bacteroidia	o__Bacteroidales	f__Muribaculaceae	g__norank_f__Muribaculaceae	s__uncultured_bacterium_g__norank_f__Muribaculaceae	ASV685	68	17	0	49	0	37	0	15	7	29	0	0	0	15	0	10	0	0	0	49	17	46	0	30
d__Bacteria	k__norank_d__Bacteria	p__Bacteroidota	c__Bacteroidia	o__Bacteroidales	f__Muribaculaceae	g__norank_f__Muribaculaceae	s__uncultured_bacterium_g__norank_f__Muribaculaceae	ASV686	0	84	44	12	0	50	34	52	0	53	7	8	24	0	43	0	36	0	44	0	0	0	13	29
d__Bacteria	k__norank_d__Bacteria	p__Bacteroidota	c__Bacteroidia	o__Bacteroidales	f__Muribaculaceae	g__norank_f__Muribaculaceae	s__uncultured_bacterium_g__norank_f__Muribaculaceae	ASV687	20	18	60	21	27	28	44	25	42	28	111	18	34	0	107	98	32	175	0	0	104	0	59	27
d__Bacteria	k__norank_d__Bacteria	p__Bacteroidota	c__Bacteroidia	o__Bacteroidales	f__Muribaculaceae	g__norank_f__Muribaculaceae	s__unclassified_g__norank_f__Muribaculaceae	ASV802	0	0	0	0	0	0	0	0	0	0	0	0	0	0	0	0	0	26	0	0	0	0	0	11
d__Bacteria	k__norank_d__Bacteria	p__Firmicutes	c__Clostridia	o__Lachnospirales	f__Lachnospiraceae	g__unclassified_f__Lachnospiraceae	s__unclassified_f__Lachnospiraceae	ASV2507	0	0	0	0	0	0	0	0	0	0	3	0	0	0	0	0	0	0	0	0	0	0	0	0
d__Bacteria	k__norank_d__Bacteria	p__Bacteroidota	c__Bacteroidia	o__Bacteroidales	f__Muribaculaceae	g__norank_f__Muribaculaceae	s__unclassified_g__norank_f__Muribaculaceae	ASV801	31	24	39	30	21	0	17	12	32	0	0	23	0	15	27	24	32	39	0	16	26	27	4	13
d__Bacteria	k__norank_d__Bacteria	p__Firmicutes	c__Clostridia	o__Lachnospirales	f__Lachnospiraceae	g__unclassified_f__Lachnospiraceae	s__unclassified_f__Lachnospiraceae	ASV852	0	26	12	22	0	15	0	3	0	0	0	0	3	0	0	12	0	0	0	0	0	7	0	7
d__Bacteria	k__norank_d__Bacteria	p__Firmicutes	c__Bacilli	o__unclassified_c__Bacilli	f__unclassified_c__Bacilli	g__unclassified_c__Bacilli	s__unclassified_c__Bacilli	ASV2265	0	0	0	0	0	0	0	0	0	0	0	0	0	8	0	22	0	0	0	0	0	0	0	0
d__Bacteria	k__norank_d__Bacteria	p__Bacteroidota	c__Bacteroidia	o__Bacteroidales	f__Muribaculaceae	g__norank_f__Muribaculaceae	s__uncultured_bacterium_g__norank_f__Muribaculaceae	ASV1565	0	0	0	0	0	0	0	0	0	0	0	0	0	0	0	14	0	6	9	0	0	0	0	0
d__Bacteria	k__norank_d__Bacteria	p__Cyanobacteria	c__Vampirivibrionia	o__Gastranaerophilales	f__norank_o__Gastranaerophilales	g__norank_f__norank_o__Gastranaerophilales	s__uncultured_bacterium_g__norank_f__norank_o__Gastranaerophilales	ASV1577	0	0	0	0	0	0	0	0	0	0	0	0	0	0	0	0	0	0	4	0	0	0	0	0
d__Bacteria	k__norank_d__Bacteria	p__Firmicutes	c__Clostridia	o__Oscillospirales	f__Oscillospiraceae	g__unclassified_f__Oscillospiraceae	s__unclassified_f__Oscillospiraceae	ASV2747	0	0	0	0	0	0	0	0	0	0	0	0	0	0	0	3	0	2	0	0	0	0	0	0
d__Bacteria	k__norank_d__Bacteria	p__Firmicutes	c__Clostridia	o__Lachnospirales	f__Lachnospiraceae	g__unclassified_f__Lachnospiraceae	s__unclassified_f__Lachnospiraceae	ASV2181	0	0	0	0	0	0	0	0	0	0	0	0	0	0	0	0	0	0	0	64	0	0	0	0
d__Bacteria	k__norank_d__Bacteria	p__Firmicutes	c__Clostridia	o__Lachnospirales	f__Lachnospiraceae	g__Eubacterium_ruminantium_group	s__uncultured_bacterium_g__Eubacterium_ruminantium_group	ASV2677	0	0	0	0	0	0	0	0	0	0	0	42	0	0	0	0	0	91	0	0	13	0	0	0
d__Bacteria	k__norank_d__Bacteria	p__Firmicutes	c__Clostridia	o__Lachnospirales	f__Lachnospiraceae	g__unclassified_f__Lachnospiraceae	s__unclassified_f__Lachnospiraceae	ASV2184	0	0	0	0	0	0	0	0	0	0	0	0	0	0	0	0	0	0	0	47	0	0	0	0
d__Bacteria	k__norank_d__Bacteria	p__Firmicutes	c__Clostridia	o__Oscillospirales	f__Ruminococcaceae	g__norank_f__Ruminococcaceae	s__Clostridium_sp._Culture_Jar-13	ASV1548	0	0	17	0	0	0	0	0	0	0	0	0	0	0	0	0	0	0	12	0	0	0	0	0
d__Bacteria	k__norank_d__Bacteria	p__Campilobacterota	c__Campylobacteria	o__Campylobacterales	f__Helicobacteraceae	g__Helicobacter	s__unclassified_g__Helicobacter	ASV1579	5	0	0	0	0	0	0	0	0	0	0	0	0	3	0	0	0	0	5	0	0	6	0	0
d__Bacteria	k__norank_d__Bacteria	p__Firmicutes	c__Clostridia	o__Lachnospirales	f__Lachnospiraceae	g__unclassified_f__Lachnospiraceae	s__unclassified_f__Lachnospiraceae	ASV2476	0	0	0	0	0	0	0	91	0	0	8	0	0	0	32	0	0	0	0	0	0	0	42	0
d__Bacteria	k__norank_d__Bacteria	p__Bacteroidota	c__Bacteroidia	o__Bacteroidales	f__Muribaculaceae	g__norank_f__Muribaculaceae	s__uncultured_bacterium_g__norank_f__Muribaculaceae	ASV2009	0	0	0	5	0	0	0	0	0	0	0	0	0	0	0	0	0	0	0	0	0	0	0	0
d__Bacteria	k__norank_d__Bacteria	p__Bacteroidota	c__Bacteroidia	o__Bacteroidales	f__Muribaculaceae	g__norank_f__Muribaculaceae	s__uncultured_bacterium_g__norank_f__Muribaculaceae	ASV2455	0	0	0	0	0	0	0	0	0	0	18	0	0	0	0	0	0	0	0	0	0	0	0	0
d__Bacteria	k__norank_d__Bacteria	p__Firmicutes	c__Clostridia	o__Oscillospirales	f__Ruminococcaceae	g__Eubacterium_siraeum_group	s__unclassified_g__Eubacterium_siraeum_group	ASV924	0	0	0	0	12	0	24	0	0	0	0	0	8	0	10	0	0	0	0	31	0	180	37	0
d__Bacteria	k__norank_d__Bacteria	p__Firmicutes	c__Clostridia	o__Clostridia_vadinBB60_group	f__norank_o__Clostridia_vadinBB60_group	g__norank_f__norank_o__Clostridia_vadinBB60_group	s__unclassified_g__norank_f__norank_o__Clostridia_vadinBB60_group	ASV2678	0	0	0	0	0	0	0	0	0	0	0	0	0	0	0	0	0	0	0	0	11	0	5	0
d__Bacteria	k__norank_d__Bacteria	p__Firmicutes	c__Clostridia	o__Lachnospirales	f__Lachnospiraceae	g__Lachnospiraceae_NK4A136_group	s__unclassified_g__Lachnospiraceae_NK4A136_group	ASV2699	0	0	0	0	0	0	0	0	0	0	0	0	0	0	0	120	0	0	0	0	0	0	0	0
d__Bacteria	k__norank_d__Bacteria	p__Firmicutes	c__Clostridia	o__Lachnospirales	f__Lachnospiraceae	g__Lachnospiraceae_NK4A136_group	s__unclassified_g__Lachnospiraceae_NK4A136_group	ASV623	0	0	0	0	0	0	0	0	0	0	0	0	0	0	0	0	0	0	0	0	0	0	0	107
d__Bacteria	k__norank_d__Bacteria	p__Firmicutes	c__Clostridia	o__Lachnospirales	f__Lachnospiraceae	g__Acetatifactor	s__unclassified_g__Acetatifactor	ASV1501	0	0	18	0	0	0	18	20	0	0	0	0	19	0	15	0	0	0	28	0	0	0	0	0
d__Bacteria	k__norank_d__Bacteria	p__Firmicutes	c__Clostridia	o__Monoglobales	f__Monoglobaceae	g__Monoglobus	s__uncultured_rumen_bacterium_g__Monoglobus	ASV2955	6	0	0	0	0	0	0	0	0	0	0	0	0	0	0	0	0	0	0	0	0	0	0	0
d__Bacteria	k__norank_d__Bacteria	p__Firmicutes	c__Clostridia	o__Lachnospirales	f__Lachnospiraceae	g__Lachnospiraceae_UCG-001	s__unclassified_g__Lachnospiraceae_UCG-001	ASV2827	0	0	0	0	0	0	0	0	0	0	0	0	0	0	23	0	0	0	0	0	0	0	0	0
d__Bacteria	k__norank_d__Bacteria	p__Firmicutes	c__Bacilli	o__RF39	f__norank_o__RF39	g__norank_f__norank_o__RF39	s__uncultured_bacterium_g__norank_f__norank_o__RF39	ASV3000	0	0	0	0	0	0	0	0	0	0	0	0	0	0	0	0	2	0	0	0	0	0	0	0
d__Bacteria	k__norank_d__Bacteria	p__Firmicutes	c__Bacilli	o__RF39	f__norank_o__RF39	g__norank_f__norank_o__RF39	s__uncultured_bacterium_g__norank_f__norank_o__RF39	ASV3007	0	0	0	0	0	0	0	0	0	0	0	18	0	0	0	0	0	0	0	0	0	0	0	0
d__Bacteria	k__norank_d__Bacteria	p__Firmicutes	c__Clostridia	o__Oscillospirales	f__UCG-010	g__norank_f__UCG-010	s__unclassified_g__norank_f__UCG-010	ASV612	0	0	0	4	4	0	3	2	0	0	5	0	0	11	0	0	0	6	3	0	2	6	4	0
d__Bacteria	k__norank_d__Bacteria	p__Actinobacteriota	c__Coriobacteriia	o__Coriobacteriales	f__Eggerthellaceae	g__Enterorhabdus	s__uncultured_bacterium_g__Enterorhabdus	ASV2544	0	0	0	0	0	6	0	0	0	0	0	0	0	0	0	0	0	0	0	0	0	0	0	0
d__Bacteria	k__norank_d__Bacteria	p__Desulfobacterota	c__Desulfovibrionia	o__Desulfovibrionales	f__Desulfovibrionaceae	g__Desulfovibrio	s__unclassified_g__Desulfovibrio	ASV2018	0	0	0	3	0	0	0	0	0	0	0	0	0	0	0	0	0	0	0	0	2	0	2	0
d__Bacteria	k__norank_d__Bacteria	p__Firmicutes	c__Clostridia	o__Oscillospirales	f__Oscillospiraceae	g__norank_f__Oscillospiraceae	s__unclassified_g__norank_f__Oscillospiraceae	ASV693	0	0	0	0	0	0	0	22	0	0	0	0	0	0	0	0	0	0	0	0	0	28	0	32
d__Bacteria	k__norank_d__Bacteria	p__Bacteroidota	c__Bacteroidia	o__Bacteroidales	f__Muribaculaceae	g__norank_f__Muribaculaceae	s__uncultured_bacterium_g__norank_f__Muribaculaceae	ASV2834	0	0	0	0	0	0	0	0	0	0	0	0	0	0	13	0	0	0	0	0	0	0	0	0
d__Bacteria	k__norank_d__Bacteria	p__Bacteroidota	c__Bacteroidia	o__Bacteroidales	f__Muribaculaceae	g__norank_f__Muribaculaceae	s__uncultured_bacterium_g__norank_f__Muribaculaceae	ASV2830	0	0	0	0	0	0	0	0	0	0	0	0	0	0	19	0	0	0	0	0	0	0	0	0
d__Bacteria	k__norank_d__Bacteria	p__Firmicutes	c__Clostridia	o__Lachnospirales	f__Lachnospiraceae	g__Eubacterium_oxidoreducens_group	s__uncultured_bacterium_g__Eubacterium_oxidoreducens_group	ASV2284	0	0	43	0	0	0	0	0	0	0	0	0	0	0	0	0	0	0	0	0	0	0	0	0
d__Bacteria	k__norank_d__Bacteria	p__Bacteroidota	c__Bacteroidia	o__Bacteroidales	f__Muribaculaceae	g__norank_f__Muribaculaceae	s__uncultured_bacterium_g__norank_f__Muribaculaceae	ASV2839	0	0	0	0	0	0	0	0	0	0	0	0	0	0	7	0	0	0	0	0	0	0	0	0
d__Bacteria	k__norank_d__Bacteria	p__Firmicutes	c__Clostridia	o__Lachnospirales	f__Lachnospiraceae	g__Lachnospiraceae_UCG-001	s__unclassified_g__Lachnospiraceae_UCG-001	ASV2073	0	0	0	0	0	0	0	0	0	19	0	0	0	17	0	0	0	0	0	0	0	0	0	0
d__Bacteria	k__norank_d__Bacteria	p__Firmicutes	c__Clostridia	o__Oscillospirales	f__Ruminococcaceae	g__unclassified_f__Ruminococcaceae	s__unclassified_f__Ruminococcaceae	ASV3083	0	0	0	0	0	0	8	0	0	0	0	0	0	0	0	0	0	0	0	0	0	0	0	0
d__Bacteria	k__norank_d__Bacteria	p__Firmicutes	c__Clostridia	o__Oscillospirales	f__UCG-010	g__norank_f__UCG-010	s__unclassified_g__norank_f__UCG-010	ASV1288	12	0	0	0	0	9	0	0	0	0	0	27	0	0	0	39	0	48	0	0	17	0	7	0
d__Bacteria	k__norank_d__Bacteria	p__Bacteroidota	c__Bacteroidia	o__Bacteroidales	f__Muribaculaceae	g__norank_f__Muribaculaceae	s__unclassified_g__norank_f__Muribaculaceae	ASV1945	0	0	0	20	0	0	0	0	0	0	0	0	0	0	0	0	0	0	0	0	0	0	0	0
d__Bacteria	k__norank_d__Bacteria	p__Bacteroidota	c__Bacteroidia	o__Bacteroidales	f__Muribaculaceae	g__norank_f__Muribaculaceae	s__unclassified_g__norank_f__Muribaculaceae	ASV1943	0	0	20	22	0	0	0	0	0	0	0	0	0	0	0	0	0	0	0	0	0	0	0	0
d__Bacteria	k__norank_d__Bacteria	p__Bacteroidota	c__Bacteroidia	o__Bacteroidales	f__Muribaculaceae	g__norank_f__Muribaculaceae	s__uncultured_bacterium_g__norank_f__Muribaculaceae	ASV1589	0	0	0	0	0	0	0	14	0	0	0	0	0	0	0	0	0	0	3	0	0	0	0	0
d__Bacteria	k__norank_d__Bacteria	p__Firmicutes	c__Clostridia	o__Monoglobales	f__Monoglobaceae	g__Monoglobus	s__unclassified_g__Monoglobus	ASV2025	0	0	0	2	0	0	0	0	0	0	0	0	0	0	0	0	0	0	0	0	0	0	0	0
d__Bacteria	k__norank_d__Bacteria	p__Firmicutes	c__Clostridia	o__Monoglobales	f__Monoglobaceae	g__Monoglobus	s__unclassified_g__Monoglobus	ASV2022	0	0	0	3	0	5	0	0	0	0	0	0	5	0	0	0	0	0	0	0	3	0	3	0
d__Bacteria	k__norank_d__Bacteria	p__Firmicutes	c__Clostridia	o__Monoglobales	f__Monoglobaceae	g__Monoglobus	s__unclassified_g__Monoglobus	ASV900	0	0	0	8	2	0	0	0	3	0	0	0	0	0	0	0	0	0	0	0	0	0	0	4
d__Bacteria	k__norank_d__Bacteria	p__Firmicutes	c__Clostridia	o__Oscillospirales	f__Oscillospiraceae	g__NK4A214_group	s__unclassified_g__NK4A214_group	ASV2698	0	0	0	0	0	0	0	0	0	0	0	0	0	0	0	120	0	0	0	0	0	0	0	0
d__Bacteria	k__norank_d__Bacteria	p__Firmicutes	c__Clostridia	o__Oscillospirales	f__Ruminococcaceae	g__Fournierella	s__unclassified_g__Fournierella	ASV481	0	0	0	8	0	0	0	7	19	0	0	4	10	0	8	0	0	0	0	0	4	0	0	0
d__Bacteria	k__norank_d__Bacteria	p__Bacteroidota	c__Bacteroidia	o__Bacteroidales	f__Muribaculaceae	g__norank_f__Muribaculaceae	s__unclassified_g__norank_f__Muribaculaceae	ASV2105	15	0	0	0	0	0	0	0	12	3	0	24	0	0	0	0	0	0	0	0	0	0	12	0
d__Bacteria	k__norank_d__Bacteria	p__Firmicutes	c__Clostridia	o__Lachnospirales	f__Lachnospiraceae	g__unclassified_f__Lachnospiraceae	s__unclassified_f__Lachnospiraceae	ASV295	0	0	0	0	0	0	44	0	0	0	0	0	0	0	0	0	0	0	0	0	0	0	0	0
d__Bacteria	k__norank_d__Bacteria	p__Deferribacterota	c__Deferribacteres	o__Deferribacterales	f__Deferribacteraceae	g__Mucispirillum	s__unclassified_g__Mucispirillum	ASV846	1	11	0	0	0	2	3	20	7	6	0	0	3	4	4	0	19	0	22	0	0	5	3	9
d__Bacteria	k__norank_d__Bacteria	p__Proteobacteria	c__Alphaproteobacteria	o__Rickettsiales	f__norank_o__Rickettsiales	g__norank_f__norank_o__Rickettsiales	s__unclassified_g__norank_f__norank_o__Rickettsiales	ASV2727	0	0	0	0	0	0	0	0	0	0	0	0	0	0	0	12	0	0	0	0	0	0	16	0
d__Bacteria	k__norank_d__Bacteria	p__Firmicutes	c__Clostridia	o__Oscillospirales	f__Oscillospiraceae	g__UCG-005	s__unclassified_g__UCG-005	ASV3089	0	0	0	0	0	0	5	0	0	0	0	0	0	0	0	0	0	0	0	0	0	0	0	0
d__Bacteria	k__norank_d__Bacteria	p__Bacteroidota	c__Bacteroidia	o__Bacteroidales	f__Prevotellaceae	g__Prevotellaceae_UCG-001	s__uncultured_bacterium_g__Prevotellaceae_UCG-001	ASV2062	0	0	0	0	0	0	0	0	0	27	0	0	0	0	0	0	0	0	0	0	0	0	0	0
d__Bacteria	k__norank_d__Bacteria	p__Firmicutes	c__Clostridia	o__Lachnospirales	f__Lachnospiraceae	g__Blautia	s__Lachnospiraceae_bacterium_DW59	ASV1655	0	0	0	0	0	0	0	0	74	0	0	0	0	0	0	0	0	0	0	0	0	0	0	0
d__Bacteria	k__norank_d__Bacteria	p__Firmicutes	c__Clostridia	o__Oscillospirales	f__Eubacterium_coprostanoligenes_group	g__norank_f__Eubacterium_coprostanoligenes_group	s__unclassified_g__norank_f__Eubacterium_coprostanoligenes_group	ASV32	0	14	0	0	0	0	10	31	0	0	0	0	12	0	3	0	0	0	0	12	0	11	0	0
d__Bacteria	k__norank_d__Bacteria	p__Spirochaetota	c__Brachyspirae	o__Brachyspirales	f__Brachyspiraceae	g__Brachyspira	s__unclassified_g__Brachyspira	ASV916	0	0	0	0	0	2	0	6	3	0	0	0	0	0	2	0	5	0	2	0	0	0	0	2
d__Bacteria	k__norank_d__Bacteria	p__Firmicutes	c__Clostridia	o__Clostridia_UCG-014	f__norank_o__Clostridia_UCG-014	g__norank_f__norank_o__Clostridia_UCG-014	s__unclassified_g__norank_f__norank_o__Clostridia_UCG-014	ASV2300	0	0	17	0	0	0	0	0	0	0	0	0	0	0	0	0	0	0	0	0	0	0	0	0
d__Bacteria	k__norank_d__Bacteria	p__Desulfobacterota	c__Desulfovibrionia	o__Desulfovibrionales	f__Desulfovibrionaceae	g__Desulfovibrio	s__uncultured_bacterium_g__Desulfovibrio	ASV868	0	7	7	5	0	0	6	0	0	0	0	0	4	0	0	11	0	0	0	0	0	0	6	8
d__Bacteria	k__norank_d__Bacteria	p__Bacteroidota	c__Bacteroidia	o__Bacteroidales	f__Muribaculaceae	g__norank_f__Muribaculaceae	s__uncultured_bacterium_g__norank_f__Muribaculaceae	ASV857	0	4	6	7	0	0	0	7	5	0	5	9	0	0	0	10	0	12	0	0	10	0	7	7
d__Bacteria	k__norank_d__Bacteria	p__Firmicutes	c__Clostridia	o__Clostridia_UCG-014	f__norank_o__Clostridia_UCG-014	g__norank_f__norank_o__Clostridia_UCG-014	s__unclassified_g__norank_f__norank_o__Clostridia_UCG-014	ASV2308	0	0	14	0	0	0	0	0	0	0	0	0	0	0	0	0	0	0	0	0	0	0	0	0
d__Bacteria	k__norank_d__Bacteria	p__Firmicutes	c__Clostridia	o__Clostridia_UCG-014	f__norank_o__Clostridia_UCG-014	g__norank_f__norank_o__Clostridia_UCG-014	s__unclassified_g__norank_f__norank_o__Clostridia_UCG-014	ASV2234	0	0	0	0	0	0	0	0	0	0	0	0	0	0	0	0	0	0	0	5	0	0	0	0
d__Bacteria	k__norank_d__Bacteria	p__Firmicutes	c__Bacilli	o__Erysipelotrichales	f__Erysipelotrichaceae	g__norank_f__Erysipelotrichaceae	s__unclassified_g__norank_f__Erysipelotrichaceae	ASV282	0	0	0	0	0	0	0	0	0	0	0	0	0	0	0	0	9	0	0	0	0	0	0	0
d__Bacteria	k__norank_d__Bacteria	p__Firmicutes	c__Clostridia	o__Oscillospirales	f__Oscillospiraceae	g__UCG-005	s__uncultured_Clostridiales_bacterium_g__UCG-005	ASV602	0	5	5	0	0	0	0	0	0	0	0	0	0	0	0	5	0	8	0	0	0	2	0	0
d__Bacteria	k__norank_d__Bacteria	p__Firmicutes	c__Clostridia	o__Oscillospirales	f__Oscillospiraceae	g__UCG-005	s__unclassified_g__UCG-005	ASV2494	0	0	0	0	0	0	0	0	0	0	2	0	0	0	0	0	0	0	0	0	0	0	0	0
d__Bacteria	k__norank_d__Bacteria	p__Cyanobacteria	c__Vampirivibrionia	o__Gastranaerophilales	f__norank_o__Gastranaerophilales	g__norank_f__norank_o__Gastranaerophilales	s__uncultured_bacterium_g__norank_f__norank_o__Gastranaerophilales	ASV2269	0	0	2	0	0	0	0	3	0	0	0	0	0	8	0	0	0	0	0	0	0	0	0	0
d__Bacteria	k__norank_d__Bacteria	p__Firmicutes	c__Clostridia	o__Lachnospirales	f__Lachnospiraceae	g__unclassified_f__Lachnospiraceae	s__unclassified_f__Lachnospiraceae	ASV1195	0	0	0	0	12	0	267	0	0	0	65	29	199	0	0	53	174	22	21	0	0	0	0	0
d__Bacteria	k__norank_d__Bacteria	p__Firmicutes	c__Bacilli	o__RF39	f__norank_o__RF39	g__norank_f__norank_o__RF39	s__uncultured_bacterium_g__norank_f__norank_o__RF39	ASV2320	0	0	8	0	0	0	2	0	0	0	0	0	0	0	0	0	0	0	0	0	0	0	0	0
d__Bacteria	k__norank_d__Bacteria	p__Firmicutes	c__Clostridia	o__Oscillospirales	f__Oscillospiraceae	g__norank_f__Oscillospiraceae	s__unclassified_g__norank_f__Oscillospiraceae	ASV2516	64	0	0	0	0	54	0	0	0	0	0	44	0	0	0	0	0	0	0	0	0	0	0	0
d__Bacteria	k__norank_d__Bacteria	p__Firmicutes	c__Clostridia	o__Oscillospirales	f__Butyricicoccaceae	g__Butyricicoccus	s__unclassified_g__Butyricicoccus	ASV1892	0	0	7	4	0	4	0	0	0	0	0	0	0	0	0	0	0	0	0	0	0	7	1	0
d__Bacteria	k__norank_d__Bacteria	p__Bacteroidota	c__Bacteroidia	o__Bacteroidales	f__Muribaculaceae	g__norank_f__Muribaculaceae	s__unclassified_g__norank_f__Muribaculaceae	ASV1574	0	30	0	0	0	0	36	0	0	0	11	0	0	54	58	20	0	0	3	0	0	78	49	0
d__Bacteria	k__norank_d__Bacteria	p__Firmicutes	c__Clostridia	o__Monoglobales	f__Monoglobaceae	g__Monoglobus	s__uncultured_bacterium_g__Monoglobus	ASV1306	0	0	0	0	0	0	0	0	0	0	4	0	0	4	0	0	6	0	0	0	0	0	8	0
d__Bacteria	k__norank_d__Bacteria	p__Patescibacteria	c__Saccharimonadia	o__Saccharimonadales	f__Saccharimonadaceae	g__Candidatus_Saccharimonas	s__uncultured_bacterium_g__Candidatus_Saccharimonas	ASV2712	0	0	0	0	0	0	0	0	0	0	0	0	0	0	0	25	0	0	0	0	0	0	0	0
d__Bacteria	k__norank_d__Bacteria	p__Firmicutes	c__Bacilli	o__Bacillales	f__Bacillaceae	g__Bacillus	s__Lactobacillus_vaginalis_g__Bacillus	ASV1169	0	0	0	0	25	0	23	0	0	45	0	0	29	0	21	0	41	0	0	0	0	0	0	0
d__Bacteria	k__norank_d__Bacteria	p__Actinobacteriota	c__Coriobacteriia	o__Coriobacteriales	f__Eggerthellaceae	g__Enterorhabdus	s__uncultured_bacterium_g__Enterorhabdus	ASV585	7	6	0	0	8	0	0	12	0	0	0	0	10	0	0	0	14	0	0	8	0	10	0	5
d__Bacteria	k__norank_d__Bacteria	p__Bacteroidota	c__Bacteroidia	o__Bacteroidales	f__Muribaculaceae	g__norank_f__Muribaculaceae	s__uncultured_bacterium_g__norank_f__Muribaculaceae	ASV826	0	0	0	30	17	0	0	0	12	20	44	0	0	4	0	0	0	29	58	86	0	25	9	11
d__Bacteria	k__norank_d__Bacteria	p__Firmicutes	c__Clostridia	o__Oscillospirales	f__Oscillospiraceae	g__UCG-005	s__uncultured_Clostridiales_bacterium_g__UCG-005	ASV284	5	14	0	8	0	8	6	17	0	11	4	0	6	0	2	0	6	0	8	0	0	10	0	8
d__Bacteria	k__norank_d__Bacteria	p__Desulfobacterota	c__Desulfovibrionia	o__Desulfovibrionales	f__Desulfovibrionaceae	g__Desulfovibrio	s__unclassified_g__Desulfovibrio	ASV1573	0	0	0	0	0	0	0	0	0	0	0	0	0	0	0	0	0	0	6	0	0	0	0	0
d__Bacteria	k__norank_d__Bacteria	p__Firmicutes	c__Bacilli	o__Lactobacillales	f__Lactobacillaceae	g__Lactobacillus	s__unclassified_g__Lactobacillus	ASV2380	0	0	0	0	0	0	0	0	26	0	0	0	0	0	0	0	0	0	0	0	0	0	0	0
d__Bacteria	k__norank_d__Bacteria	p__Bacteroidota	c__Bacteroidia	o__Bacteroidales	f__Muribaculaceae	g__norank_f__Muribaculaceae	s__unclassified_g__norank_f__Muribaculaceae	ASV2376	0	0	0	0	0	0	0	0	28	0	10	0	0	0	0	0	0	0	0	0	0	0	0	0
d__Bacteria	k__norank_d__Bacteria	p__Bacteroidota	c__Bacteroidia	o__Bacteroidales	f__Muribaculaceae	g__norank_f__Muribaculaceae	s__unclassified_g__norank_f__Muribaculaceae	ASV1171	0	20	0	0	26	0	16	0	0	23	0	0	0	0	18	29	0	28	33	0	0	0	39	0
d__Bacteria	k__norank_d__Bacteria	p__Bacteroidota	c__Bacteroidia	o__Bacteroidales	f__Muribaculaceae	g__norank_f__Muribaculaceae	s__unclassified_g__norank_f__Muribaculaceae	ASV1176	0	15	34	0	19	0	17	0	0	0	0	0	0	0	38	0	0	0	0	0	0	0	0	0
d__Bacteria	k__norank_d__Bacteria	p__Firmicutes	c__Clostridia	o__Lachnospirales	f__Lachnospiraceae	g__unclassified_f__Lachnospiraceae	s__unclassified_f__Lachnospiraceae	ASV1975	0	0	0	11	0	0	0	0	0	0	0	0	0	0	0	0	0	0	0	0	0	0	0	0
d__Bacteria	k__norank_d__Bacteria	p__Firmicutes	c__Clostridia	o__Lachnospirales	f__Lachnospiraceae	g__unclassified_f__Lachnospiraceae	s__unclassified_f__Lachnospiraceae	ASV1977	0	0	0	13	0	0	0	42	0	0	0	0	0	0	0	0	0	0	0	0	0	0	0	0
d__Bacteria	k__norank_d__Bacteria	p__Firmicutes	c__Clostridia	o__Lachnospirales	f__Lachnospiraceae	g__unclassified_f__Lachnospiraceae	s__unclassified_f__Lachnospiraceae	ASV1976	0	0	0	11	0	0	0	11	25	0	0	11	0	0	0	0	0	0	0	0	0	0	0	0
d__Bacteria	k__norank_d__Bacteria	p__Firmicutes	c__Clostridia	o__Lachnospirales	f__Lachnospiraceae	g__unclassified_f__Lachnospiraceae	s__unclassified_f__Lachnospiraceae	ASV1973	154	0	169	12	0	0	80	0	35	0	0	0	4	78	0	0	12	0	0	0	0	0	0	0
d__Bacteria	k__norank_d__Bacteria	p__Bacteroidota	c__Bacteroidia	o__Bacteroidales	f__Muribaculaceae	g__norank_f__Muribaculaceae	s__uncultured_bacterium_g__norank_f__Muribaculaceae	ASV3059	12	0	0	0	0	0	0	0	0	0	0	0	0	0	0	0	0	0	0	0	0	0	0	0
d__Bacteria	k__norank_d__Bacteria	p__Firmicutes	c__Bacilli	o__Bacillales	f__Bacillaceae	g__Bacillus	s__Lactobacillus_vaginalis_g__Bacillus	ASV755	0	18	0	0	0	0	16	24	0	19	0	0	0	0	0	0	24	0	0	0	0	0	0	21
d__Bacteria	k__norank_d__Bacteria	p__Bacteroidota	c__Bacteroidia	o__Bacteroidales	f__Muribaculaceae	g__norank_f__Muribaculaceae	s__uncultured_bacterium_g__norank_f__Muribaculaceae	ASV3055	16	0	0	0	0	0	0	0	0	0	0	0	0	0	0	0	0	0	0	0	0	0	0	0
d__Bacteria	k__norank_d__Bacteria	p__Bacteroidota	c__Bacteroidia	o__Bacteroidales	f__Muribaculaceae	g__norank_f__Muribaculaceae	s__uncultured_bacterium_g__norank_f__Muribaculaceae	ASV3056	16	0	0	0	0	0	0	0	0	0	0	0	0	0	0	0	0	0	0	0	0	0	0	0
d__Bacteria	k__norank_d__Bacteria	p__Bacteroidota	c__Bacteroidia	o__Bacteroidales	f__Muribaculaceae	g__norank_f__Muribaculaceae	s__uncultured_bacterium_g__norank_f__Muribaculaceae	ASV3053	19	0	0	0	0	0	0	0	0	0	0	0	0	0	0	0	0	0	0	0	0	0	0	0
d__Bacteria	k__norank_d__Bacteria	p__Bacteroidota	c__Bacteroidia	o__Bacteroidales	f__Muribaculaceae	g__norank_f__Muribaculaceae	s__uncultured_bacterium_g__norank_f__Muribaculaceae	ASV3052	18	0	0	0	0	0	0	0	0	0	0	0	0	0	0	0	0	0	0	0	0	0	0	0
d__Bacteria	k__norank_d__Bacteria	p__Firmicutes	c__Clostridia	o__Oscillospirales	f__Butyricicoccaceae	g__Butyricicoccus	s__uncultured_bacterium_g__Butyricicoccus	ASV2349	0	0	2	0	0	0	0	0	0	0	0	0	0	0	0	0	0	0	0	0	0	0	0	0
d__Bacteria	k__norank_d__Bacteria	p__Firmicutes	c__Bacilli	o__Lactobacillales	f__Lactobacillaceae	g__Lactobacillus	s__unclassified_g__Lactobacillus	ASV1499	0	0	0	0	0	0	0	0	0	0	0	0	153	77	0	0	118	0	23	0	0	0	0	0
d__Bacteria	k__norank_d__Bacteria	p__Firmicutes	c__Clostridia	o__Oscillospirales	f__Oscillospiraceae	g__Oscillibacter	s__uncultured_bacterium_g__Oscillibacter	ASV3085	0	0	0	0	0	0	8	0	0	0	0	0	0	0	0	0	0	0	0	0	0	0	0	0
d__Bacteria	k__norank_d__Bacteria	p__Bacteroidota	c__Bacteroidia	o__Bacteroidales	f__Muribaculaceae	g__norank_f__Muribaculaceae	s__uncultured_bacterium_g__norank_f__Muribaculaceae	ASV1831	0	0	0	0	0	40	0	0	0	0	0	0	0	0	0	31	0	0	0	0	0	30	0	0
d__Bacteria	k__norank_d__Bacteria	p__Firmicutes	c__Clostridia	o__Oscillospirales	f__Oscillospiraceae	g__unclassified_f__Oscillospiraceae	s__unclassified_f__Oscillospiraceae	ASV1183	10	9	7	14	18	0	9	0	11	0	13	0	4	11	0	0	5	16	9	4	10	6	0	0
d__Bacteria	k__norank_d__Bacteria	p__Firmicutes	c__Clostridia	o__Oscillospirales	f__Oscillospiraceae	g__UCG-002	s__unclassified_g__UCG-002	ASV1327	0	0	0	0	0	0	0	0	0	0	0	2	0	0	0	0	0	0	0	0	0	0	0	0
d__Bacteria	k__norank_d__Bacteria	p__Proteobacteria	c__Alphaproteobacteria	o__Paracaedibacterales	f__Paracaedibacteraceae	g__norank_f__Paracaedibacteraceae	s__uncultured_Alphaproteobacteria_bacterium_g__norank_f__Paracaedibacteraceae	ASV2726	0	0	0	0	0	0	0	0	0	0	0	0	0	0	0	11	0	0	0	0	0	0	0	0
d__Bacteria	k__norank_d__Bacteria	p__Firmicutes	c__Clostridia	o__Lachnospirales	f__Lachnospiraceae	g__unclassified_f__Lachnospiraceae	s__unclassified_f__Lachnospiraceae	ASV2548	0	0	0	0	0	5	0	0	0	0	0	0	0	0	0	0	0	0	0	0	0	0	0	0
d__Bacteria	k__norank_d__Bacteria	p__Firmicutes	c__Clostridia	o__Oscillospirales	f__Oscillospiraceae	g__norank_f__Oscillospiraceae	s__unclassified_g__norank_f__Oscillospiraceae	ASV1871	0	0	0	0	0	0	0	0	0	0	0	0	0	0	0	0	0	0	0	0	0	10	0	0
d__Bacteria	k__norank_d__Bacteria	p__Bacteroidota	c__Bacteroidia	o__Bacteroidales	f__Muribaculaceae	g__Muribaculum	s__unclassified_g__Muribaculum	ASV2223	0	0	0	0	0	0	0	0	0	0	0	0	0	0	0	0	0	0	0	8	0	0	0	0
d__Bacteria	k__norank_d__Bacteria	p__Firmicutes	c__Bacilli	o__RF39	f__norank_o__RF39	g__norank_f__norank_o__RF39	s__uncultured_bacterium_g__norank_f__norank_o__RF39	ASV2503	0	0	0	0	0	0	0	0	0	0	3	0	0	0	0	0	0	0	0	0	0	0	0	0
d__Bacteria	k__norank_d__Bacteria	p__Firmicutes	c__Bacilli	o__RF39	f__norank_o__RF39	g__norank_f__norank_o__RF39	s__uncultured_bacterium_g__norank_f__norank_o__RF39	ASV2506	0	0	0	0	0	0	0	0	0	0	2	0	0	0	0	0	0	0	0	0	0	0	0	0
d__Bacteria	k__norank_d__Bacteria	p__Firmicutes	c__Clostridia	o__Lachnospirales	f__Lachnospiraceae	g__unclassified_f__Lachnospiraceae	s__unclassified_f__Lachnospiraceae	ASV1992	0	0	0	6	0	0	0	0	0	0	0	0	0	0	0	0	0	0	0	0	0	0	0	0
d__Bacteria	k__norank_d__Bacteria	p__Bacteroidota	c__Bacteroidia	o__Bacteroidales	f__Muribaculaceae	g__norank_f__Muribaculaceae	s__uncultured_bacterium_g__norank_f__Muribaculaceae	ASV1907	3	7	0	4	0	0	3	3	10	10	8	13	0	0	8	8	3	17	0	8	5	4	4	0
d__Bacteria	k__norank_d__Bacteria	p__Firmicutes	c__Clostridia	o__Christensenellales	f__Christensenellaceae	g__Christensenellaceae_R-7_group	s__bacterium_YE57	ASV2491	0	0	0	0	0	0	0	0	0	0	5	0	0	0	0	0	0	0	0	0	0	0	0	0
d__Bacteria	k__norank_d__Bacteria	p__Firmicutes	c__Clostridia	o__Lachnospirales	f__Lachnospiraceae	g__unclassified_f__Lachnospiraceae	s__unclassified_f__Lachnospiraceae	ASV1999	0	0	8	6	0	0	0	0	0	0	0	0	0	0	0	0	0	0	0	0	0	0	0	0
d__Bacteria	k__norank_d__Bacteria	p__Firmicutes	c__Bacilli	o__Bacillales	f__Bacillaceae	g__Bacillus	s__Lactobacillus_vaginalis_g__Bacillus	ASV2831	0	0	0	0	0	0	0	0	0	0	0	0	12	0	13	0	0	0	0	0	0	0	0	0
d__Bacteria	k__norank_d__Bacteria	p__Firmicutes	c__Bacilli	o__unclassified_c__Bacilli	f__unclassified_c__Bacilli	g__unclassified_c__Bacilli	s__unclassified_c__Bacilli	ASV3081	0	0	0	0	0	0	14	0	0	0	0	0	0	0	0	0	0	0	0	0	0	0	0	0
d__Bacteria	k__norank_d__Bacteria	p__Firmicutes	c__Bacilli	o__unclassified_c__Bacilli	f__unclassified_c__Bacilli	g__unclassified_c__Bacilli	s__unclassified_c__Bacilli	ASV3080	0	0	0	0	0	0	18	0	0	0	0	0	0	0	0	0	0	0	0	0	0	0	0	0
d__Bacteria	k__norank_d__Bacteria	p__Firmicutes	c__Clostridia	o__unclassified_c__Clostridia	f__unclassified_c__Clostridia	g__unclassified_c__Clostridia	s__unclassified_c__Clostridia	ASV2934	0	0	0	0	0	0	0	0	0	0	0	0	1	0	0	0	0	0	0	0	0	0	0	0
d__Bacteria	k__norank_d__Bacteria	p__Firmicutes	c__Clostridia	o__Lachnospirales	f__Lachnospiraceae	g__unclassified_f__Lachnospiraceae	s__unclassified_f__Lachnospiraceae	ASV2542	0	0	0	0	0	8	0	0	0	0	0	0	0	0	0	0	0	0	0	0	0	0	0	0
d__Bacteria	k__norank_d__Bacteria	p__Firmicutes	c__Clostridia	o__Lachnospirales	f__Lachnospiraceae	g__unclassified_f__Lachnospiraceae	s__unclassified_f__Lachnospiraceae	ASV629	0	0	0	0	0	0	0	27	85	42	0	0	0	0	53	3	0	0	0	20	52	0	0	68
d__Bacteria	k__norank_d__Bacteria	p__Firmicutes	c__Clostridia	o__Oscillospirales	f__Ruminococcaceae	g__Ruminococcus	s__unclassified_g__Ruminococcus	ASV377	0	0	0	0	0	86	0	0	0	0	0	0	0	0	0	0	0	9	88	8	0	70	0	0
d__Bacteria	k__norank_d__Bacteria	p__Bacteroidota	c__Bacteroidia	o__Bacteroidales	f__Muribaculaceae	g__norank_f__Muribaculaceae	s__uncultured_bacterium_g__norank_f__Muribaculaceae	ASV2802	0	0	0	0	0	0	26	0	0	0	0	0	29	0	0	0	0	0	0	0	0	0	17	0
d__Bacteria	k__norank_d__Bacteria	p__Firmicutes	c__Clostridia	o__Lachnospirales	f__Lachnospiraceae	g__unclassified_f__Lachnospiraceae	s__unclassified_f__Lachnospiraceae	ASV620	0	0	0	0	0	0	0	0	0	0	0	0	0	0	0	0	0	0	0	0	0	0	0	144
d__Bacteria	k__norank_d__Bacteria	p__Firmicutes	c__Clostridia	o__Oscillospirales	f__Ruminococcaceae	g__Ruminococcus	s__unclassified_g__Ruminococcus	ASV175	0	25	0	3	0	0	0	0	0	0	0	28	0	6	18	0	0	24	0	0	58	113	0	0
d__Bacteria	k__norank_d__Bacteria	p__Bacteroidota	c__Bacteroidia	o__Bacteroidales	f__Muribaculaceae	g__norank_f__Muribaculaceae	s__uncultured_bacterium_g__norank_f__Muribaculaceae	ASV1592	0	0	2	0	0	0	0	0	2	0	0	2	0	0	0	0	0	0	3	4	0	0	3	0
d__Bacteria	k__norank_d__Bacteria	p__Bacteroidota	c__Bacteroidia	o__Bacteroidales	f__Muribaculaceae	g__norank_f__Muribaculaceae	s__uncultured_bacterium_g__norank_f__Muribaculaceae	ASV1590	0	0	0	0	0	0	5	0	0	3	10	6	0	1	11	0	0	0	4	2	0	0	9	0
d__Bacteria	k__norank_d__Bacteria	p__Bacteroidota	c__Bacteroidia	o__Bacteroidales	f__Muribaculaceae	g__norank_f__Muribaculaceae	s__unclassified_g__norank_f__Muribaculaceae	ASV1952	0	16	0	16	0	0	0	14	35	8	0	0	0	0	0	0	17	0	0	0	0	0	0	0
d__Bacteria	k__norank_d__Bacteria	p__Bacteroidota	c__Bacteroidia	o__Bacteroidales	f__Muribaculaceae	g__norank_f__Muribaculaceae	s__unclassified_g__norank_f__Muribaculaceae	ASV1953	0	27	35	17	0	0	11	19	0	0	18	0	7	0	0	0	5	18	0	0	36	0	10	0
d__Bacteria	k__norank_d__Bacteria	p__Bacteroidota	c__Bacteroidia	o__Bacteroidales	f__Muribaculaceae	g__norank_f__Muribaculaceae	s__unclassified_g__norank_f__Muribaculaceae	ASV2124	35	0	28	0	0	0	0	0	0	0	0	0	0	0	0	0	0	0	0	0	27	0	10	0
d__Bacteria	k__norank_d__Bacteria	p__Firmicutes	c__Clostridia	o__Oscillospirales	f__Oscillospiraceae	g__unclassified_f__Oscillospiraceae	s__unclassified_f__Oscillospiraceae	ASV851	0	0	17	7	3	0	9	0	12	0	6	0	0	0	0	0	5	10	7	0	7	0	4	6
d__Bacteria	k__norank_d__Bacteria	p__Firmicutes	c__Clostridia	o__Oscillospirales	f__Oscillospiraceae	g__unclassified_f__Oscillospiraceae	s__unclassified_f__Oscillospiraceae	ASV859	3	0	6	0	0	0	0	0	4	4	0	0	4	0	0	0	0	11	0	0	0	3	2	5
d__Bacteria	k__norank_d__Bacteria	p__Firmicutes	c__Bacilli	o__Lactobacillales	f__Lactobacillaceae	g__Lactobacillus	s__unclassified_g__Lactobacillus	ASV1128	0	0	0	0	385	0	39	0	0	0	0	0	110	0	72	0	0	0	0	0	0	0	0	0
d__Bacteria	k__norank_d__Bacteria	p__Firmicutes	c__Clostridia	o__Clostridia_vadinBB60_group	f__norank_o__Clostridia_vadinBB60_group	g__norank_f__norank_o__Clostridia_vadinBB60_group	s__unclassified_g__norank_f__norank_o__Clostridia_vadinBB60_group	ASV811	0	0	0	0	0	0	0	3	0	0	0	0	3	0	0	0	0	0	0	0	0	0	0	12
d__Bacteria	k__norank_d__Bacteria	p__Bacteroidota	c__Bacteroidia	o__Bacteroidales	f__Muribaculaceae	g__norank_f__Muribaculaceae	s__uncultured_bacterium_g__norank_f__Muribaculaceae	ASV1174	13	9	0	12	24	0	5	26	33	34	11	5	28	0	18	45	0	62	34	26	42	11	31	0
d__Bacteria	k__norank_d__Bacteria	p__Bacteroidota	c__Bacteroidia	o__Bacteroidales	f__Muribaculaceae	g__norank_f__Muribaculaceae	s__uncultured_bacterium_g__norank_f__Muribaculaceae	ASV1175	0	0	0	0	25	0	0	0	0	0	0	0	0	0	0	0	0	0	0	0	0	0	0	0
d__Bacteria	k__norank_d__Bacteria	p__Bacteroidota	c__Bacteroidia	o__Bacteroidales	f__Muribaculaceae	g__norank_f__Muribaculaceae	s__uncultured_bacterium_g__norank_f__Muribaculaceae	ASV1177	16	26	60	29	24	28	37	0	0	24	8	0	0	28	17	8	18	26	32	12	19	16	105	0
d__Bacteria	k__norank_d__Bacteria	p__Firmicutes	c__Clostridia	o__Lachnospirales	f__Lachnospiraceae	g__Lachnospiraceae_UCG-001	s__unclassified_g__Lachnospiraceae_UCG-001	ASV1401	20	0	0	0	0	0	0	0	0	0	7	0	0	0	19	0	0	0	0	0	0	0	0	0
d__Bacteria	k__norank_d__Bacteria	p__Firmicutes	c__Clostridia	o__Lachnospirales	f__Lachnospiraceae	g__unclassified_f__Lachnospiraceae	s__unclassified_f__Lachnospiraceae	ASV2663	0	0	0	0	0	0	0	0	0	0	0	0	0	0	0	0	0	48	0	0	36	0	0	0
d__Bacteria	k__norank_d__Bacteria	p__Bacteroidota	c__Bacteroidia	o__Bacteroidales	f__Muribaculaceae	g__norank_f__Muribaculaceae	s__uncultured_bacterium_g__norank_f__Muribaculaceae	ASV213	0	24	8	7	0	59	0	19	48	29	17	0	0	48	0	37	0	66	0	48	60	0	0	15
d__Bacteria	k__norank_d__Bacteria	p__Firmicutes	c__Bacilli	o__Lactobacillales	f__Lactobacillaceae	g__Lactobacillus	s__unclassified_g__Lactobacillus	ASV12	0	91	0	0	0	0	0	77	0	0	56	0	0	0	0	0	0	0	0	0	0	0	0	0
d__Bacteria	k__norank_d__Bacteria	p__Bacteroidota	c__Bacteroidia	o__Bacteroidales	f__Marinifilaceae	g__Odoribacter	s__unclassified_g__Odoribacter	ASV2788	0	0	0	0	0	0	0	1	0	0	0	0	0	0	0	0	0	0	0	0	0	0	0	0
d__Bacteria	k__norank_d__Bacteria	p__Actinobacteriota	c__Actinobacteria	o__Corynebacteriales	f__Corynebacteriaceae	g__Corynebacterium	s__unclassified_g__Corynebacterium	ASV3062	4	0	0	0	0	0	0	0	0	0	0	0	0	0	0	0	0	0	0	0	0	0	0	0
d__Bacteria	k__norank_d__Bacteria	p__Bacteroidota	c__Bacteroidia	o__Bacteroidales	f__Muribaculaceae	g__norank_f__Muribaculaceae	s__uncultured_bacterium_g__norank_f__Muribaculaceae	ASV699	37	3	7	24	0	7	6	0	22	0	0	20	9	12	14	9	0	10	0	31	0	22	43	26
d__Bacteria	k__norank_d__Bacteria	p__Firmicutes	c__Clostridia	o__Lachnospirales	f__Lachnospiraceae	g__unclassified_f__Lachnospiraceae	s__unclassified_f__Lachnospiraceae	ASV2263	0	9	19	0	0	0	0	19	0	0	0	0	0	12	0	0	0	0	0	0	0	0	0	0
d__Bacteria	k__norank_d__Bacteria	p__Bacteroidota	c__Bacteroidia	o__Bacteroidales	f__Muribaculaceae	g__norank_f__Muribaculaceae	s__uncultured_bacterium_g__norank_f__Muribaculaceae	ASV692	0	57	0	0	49	60	52	40	72	0	0	6	0	0	29	37	80	48	55	0	30	58	0	34
d__Bacteria	k__norank_d__Bacteria	p__Bacteroidota	c__Bacteroidia	o__Bacteroidales	f__Muribaculaceae	g__norank_f__Muribaculaceae	s__uncultured_bacterium_g__norank_f__Muribaculaceae	ASV691	42	38	35	21	41	20	16	28	72	40	21	20	47	77	119	9	41	0	60	69	45	176	25	30
d__Bacteria	k__norank_d__Bacteria	p__Bacteroidota	c__Bacteroidia	o__Bacteroidales	f__Muribaculaceae	g__norank_f__Muribaculaceae	s__uncultured_bacterium_g__norank_f__Muribaculaceae	ASV1578	0	0	0	0	0	0	32	0	5	0	0	0	0	0	14	0	0	0	2	0	0	25	22	0
d__Bacteria	k__norank_d__Bacteria	p__Firmicutes	c__Clostridia	o__Lachnospirales	f__Lachnospiraceae	g__unclassified_f__Lachnospiraceae	s__unclassified_f__Lachnospiraceae	ASV2385	0	0	0	0	0	0	0	0	18	0	0	0	0	0	0	34	0	0	0	0	0	0	0	0
d__Bacteria	k__norank_d__Bacteria	p__Bacteroidota	c__Bacteroidia	o__Bacteroidales	f__Muribaculaceae	g__norank_f__Muribaculaceae	s__uncultured_bacterium_g__norank_f__Muribaculaceae	ASV1571	0	0	0	0	0	0	0	0	0	0	0	0	0	61	62	0	0	0	6	86	0	0	0	0
d__Bacteria	k__norank_d__Bacteria	p__Desulfobacterota	c__Desulfovibrionia	o__Desulfovibrionales	f__Desulfovibrionaceae	g__Desulfovibrio	s__uncultured_bacterium_g__Desulfovibrio	ASV1962	0	0	0	20	0	0	0	0	0	0	0	0	0	0	0	0	0	0	0	0	0	0	0	0
d__Bacteria	k__norank_d__Bacteria	p__Firmicutes	c__Clostridia	o__Oscillospirales	f__Ruminococcaceae	g__unclassified_f__Ruminococcaceae	s__unclassified_f__Ruminococcaceae	ASV1567	9	0	0	0	0	16	9	9	0	0	0	2	7	0	0	0	15	0	7	0	0	0	0	0
d__Bacteria	k__norank_d__Bacteria	p__Firmicutes	c__Clostridia	o__Lachnospirales	f__Lachnospiraceae	g__unclassified_f__Lachnospiraceae	s__unclassified_f__Lachnospiraceae	ASV2064	0	0	0	0	0	0	0	0	0	20	0	0	0	0	0	0	0	0	0	0	0	0	0	0
d__Bacteria	k__norank_d__Bacteria	p__Firmicutes	c__Clostridia	o__Clostridia_UCG-014	f__norank_o__Clostridia_UCG-014	g__norank_f__norank_o__Clostridia_UCG-014	s__unclassified_g__norank_f__norank_o__Clostridia_UCG-014	ASV2161	0	0	0	0	0	0	0	0	0	0	0	0	0	0	0	7	0	0	0	0	0	0	0	0
d__Bacteria	k__norank_d__Bacteria	p__Firmicutes	c__Clostridia	o__Oscillospirales	f__Ruminococcaceae	g__unclassified_f__Ruminococcaceae	s__unclassified_f__Ruminococcaceae	ASV2431	0	0	0	0	0	2	0	0	1	0	0	0	0	0	0	0	0	0	0	0	0	0	2	0
d__Bacteria	k__norank_d__Bacteria	p__Desulfobacterota	c__Desulfovibrionia	o__Desulfovibrionales	f__Desulfovibrionaceae	g__Desulfovibrio	s__uncultured_bacterium_g__Desulfovibrio	ASV2803	0	0	0	0	0	0	0	0	0	0	0	0	0	0	0	0	0	0	0	0	0	0	14	0
d__Bacteria	k__norank_d__Bacteria	p__Firmicutes	c__Clostridia	o__Lachnospirales	f__Lachnospiraceae	g__Lachnospiraceae_NK4A136_group	s__unclassified_g__Lachnospiraceae_NK4A136_group	ASV119	0	0	0	0	80	0	0	0	0	0	0	0	0	0	0	0	60	0	0	0	0	0	0	0
d__Bacteria	k__norank_d__Bacteria	p__Firmicutes	c__Bacilli	o__Lactobacillales	f__Lactobacillaceae	g__Lactobacillus	s__unclassified_g__Lactobacillus	ASV698	0	25	0	0	0	0	0	0	0	0	0	0	0	0	12	11	25	0	0	45	19	0	0	27
d__Bacteria	k__norank_d__Bacteria	p__Firmicutes	c__Clostridia	o__Lachnospirales	f__Lachnospiraceae	g__Lachnospiraceae_NK4A136_group	s__unclassified_g__Lachnospiraceae_NK4A136_group	ASV110	6	0	0	86	0	522	0	0	0	0	50	131	0	0	0	25	0	0	11	0	8	285	0	0
d__Bacteria	k__norank_d__Bacteria	p__Firmicutes	c__Clostridia	o__Lachnospirales	f__Lachnospiraceae	g__Roseburia	s__unclassified_g__Roseburia	ASV1616	20	32	17	120	0	0	27	44	67	0	17	0	0	0	56	0	0	56	0	0	12	65	66	0
d__Bacteria	k__norank_d__Bacteria	p__Firmicutes	c__Clostridia	o__Peptostreptococcales-Tissierellales	f__Anaerovoracaceae	g__Family_XIII_UCG-001	s__uncultured_bacterium_g__Family_XIII_UCG-001	ASV795	0	0	0	0	0	12	0	12	0	3	0	0	10	0	0	0	20	0	0	0	0	0	17	12
d__Bacteria	k__norank_d__Bacteria	p__Bacteroidota	c__Bacteroidia	o__Bacteroidales	f__Muribaculaceae	g__norank_f__Muribaculaceae	s__unclassified_g__norank_f__Muribaculaceae	ASV2970	0	0	0	0	0	0	0	0	0	0	0	0	0	0	0	0	26	0	0	0	0	0	0	0
d__Bacteria	k__norank_d__Bacteria	p__Firmicutes	c__Clostridia	o__Clostridia_UCG-014	f__norank_o__Clostridia_UCG-014	g__norank_f__norank_o__Clostridia_UCG-014	s__uncultured_bacterium_g__norank_f__norank_o__Clostridia_UCG-014	ASV1321	11	12	0	0	0	10	0	0	0	0	0	0	0	0	0	14	0	0	3	10	0	0	11	0
d__Bacteria	k__norank_d__Bacteria	p__Bacteroidota	c__Bacteroidia	o__Bacteroidales	f__Rikenellaceae	g__Alistipes	s__unclassified_g__Alistipes	ASV1576	0	0	0	0	0	0	0	5	0	0	8	0	0	0	1	0	0	6	4	0	0	0	0	0
d__Bacteria	k__norank_d__Bacteria	p__Firmicutes	c__Bacilli	o__Lactobacillales	f__Lactobacillaceae	g__Lactobacillus	s__unclassified_g__Lactobacillus	ASV219	311	463	199	309	341	448	190	356	383	631	578	771	486	629	199	313	396	96	261	820	318	592	386	292
d__Bacteria	k__norank_d__Bacteria	p__Firmicutes	c__Clostridia	o__Oscillospirales	f__Oscillospiraceae	g__unclassified_f__Oscillospiraceae	s__unclassified_f__Oscillospiraceae	ASV676	0	0	27	15	0	0	0	0	0	0	0	0	0	0	7	0	0	31	0	0	0	0	0	34
d__Bacteria	k__norank_d__Bacteria	p__Firmicutes	c__Clostridia	o__Oscillospirales	f__Oscillospiraceae	g__unclassified_f__Oscillospiraceae	s__unclassified_f__Oscillospiraceae	ASV673	0	28	0	0	0	0	0	31	24	34	0	0	0	0	0	0	16	0	31	18	18	0	0	36
d__Bacteria	k__norank_d__Bacteria	p__Firmicutes	c__Clostridia	o__Oscillospirales	f__Oscillospiraceae	g__unclassified_f__Oscillospiraceae	s__unclassified_f__Oscillospiraceae	ASV1995	0	0	0	9	0	0	0	0	0	0	0	25	0	0	0	15	0	16	0	0	0	0	0	0
d__Bacteria	k__norank_d__Bacteria	p__Actinobacteriota	c__Actinobacteria	o__Corynebacteriales	f__Corynebacteriaceae	g__Corynebacterium	s__unclassified_g__Corynebacterium	ASV1889	0	0	0	0	0	0	0	0	0	0	0	0	0	0	0	0	0	0	0	0	0	7	0	0
d__Bacteria	k__norank_d__Bacteria	p__Firmicutes	c__Clostridia	o__Clostridia_UCG-014	f__norank_o__Clostridia_UCG-014	g__norank_f__norank_o__Clostridia_UCG-014	s__unclassified_g__norank_f__norank_o__Clostridia_UCG-014	ASV2782	0	0	0	0	0	0	0	5	0	0	0	0	0	0	0	0	0	0	0	0	0	0	0	0
d__Bacteria	k__norank_d__Bacteria	p__Firmicutes	c__Clostridia	o__Oscillospirales	f__UCG-010	g__norank_f__UCG-010	s__unclassified_g__norank_f__UCG-010	ASV607	0	0	0	4	0	0	0	0	3	0	0	0	0	0	0	0	2	0	0	0	0	0	0	2
d__Bacteria	k__norank_d__Bacteria	p__Bacteroidota	c__Bacteroidia	o__Bacteroidales	f__Rikenellaceae	g__Alistipes	s__uncultured_bacterium_g__Alistipes	ASV2991	0	0	0	0	0	0	0	0	0	0	0	0	0	0	0	0	3	0	0	0	0	0	0	0
d__Bacteria	k__norank_d__Bacteria	p__Verrucomicrobiota	c__Verrucomicrobiae	o__Opitutales	f__Puniceicoccaceae	g__Cerasicoccus	s__uncultured_Verrucomicrobia_bacterium_g__Cerasicoccus	ASV2345	0	0	5	0	0	0	0	0	0	0	0	0	0	0	0	0	0	0	0	0	0	0	3	0
d__Bacteria	k__norank_d__Bacteria	p__Bacteroidota	c__Bacteroidia	o__Bacteroidales	f__Muribaculaceae	g__norank_f__Muribaculaceae	s__uncultured_bacterium_g__norank_f__Muribaculaceae	ASV1229	0	0	0	0	2	0	0	0	0	0	0	0	0	0	0	0	0	0	0	0	0	0	0	0
d__Bacteria	k__norank_d__Bacteria	p__Firmicutes	c__Clostridia	o__Clostridia_UCG-014	f__norank_o__Clostridia_UCG-014	g__norank_f__norank_o__Clostridia_UCG-014	s__unclassified_g__norank_f__norank_o__Clostridia_UCG-014	ASV3019	0	0	0	0	0	0	0	0	0	0	0	7	0	0	0	0	0	0	0	0	0	0	0	0
d__Bacteria	k__norank_d__Bacteria	p__Bacteroidota	c__Bacteroidia	o__Bacteroidales	f__Muribaculaceae	g__norank_f__Muribaculaceae	s__uncultured_bacterium_g__norank_f__Muribaculaceae	ASV1223	0	0	0	0	5	0	0	0	0	0	0	0	0	0	0	0	0	0	0	0	0	0	0	0
d__Bacteria	k__norank_d__Bacteria	p__Bacteroidota	c__Bacteroidia	o__Bacteroidales	f__Muribaculaceae	g__norank_f__Muribaculaceae	s__uncultured_bacterium_g__norank_f__Muribaculaceae	ASV3025	0	0	0	0	0	0	0	0	0	0	0	3	0	0	0	0	0	0	0	0	0	0	0	0
d__Bacteria	k__norank_d__Bacteria	p__Firmicutes	c__Clostridia	o__Oscillospirales	f__Butyricicoccaceae	g__UCG-009	s__uncultured_bacterium_g__UCG-009	ASV1587	0	0	0	0	0	0	0	0	0	0	0	0	0	0	0	0	0	5	0	0	0	0	0	0
d__Bacteria	k__norank_d__Bacteria	p__Firmicutes	c__Clostridia	o__Lachnospirales	f__Lachnospiraceae	g__Lachnospiraceae_FCS020_group	s__unclassified_g__Lachnospiraceae_FCS020_group	ASV2479	0	0	0	0	0	0	0	0	0	0	7	0	0	0	0	0	0	0	0	0	0	0	0	0
d__Bacteria	k__norank_d__Bacteria	p__Firmicutes	c__Bacilli	o__Erysipelotrichales	f__Erysipelotrichaceae	g__Turicibacter	s__unclassified_g__Turicibacter	ASV378	0	0	0	0	0	0	0	0	15	0	48	56	0	0	0	52	0	16	0	0	0	0	28	0
d__Bacteria	k__norank_d__Bacteria	p__Firmicutes	c__Clostridia	o__Lachnospirales	f__Lachnospiraceae	g__unclassified_f__Lachnospiraceae	s__unclassified_f__Lachnospiraceae	ASV1696	0	12	40	0	0	0	13	0	0	0	0	0	0	0	0	0	0	0	0	0	0	0	0	0
d__Bacteria	k__norank_d__Bacteria	p__Firmicutes	c__Clostridia	o__Lachnospirales	f__Lachnospiraceae	g__Lachnospiraceae_NK4A136_group	s__unclassified_g__Lachnospiraceae_NK4A136_group	ASV1811	0	0	0	0	0	0	0	0	0	77	0	0	0	0	0	0	0	50	0	0	0	61	0	0
d__Bacteria	k__norank_d__Bacteria	p__Firmicutes	c__Clostridia	o__Oscillospirales	f__Oscillospiraceae	g__unclassified_f__Oscillospiraceae	s__unclassified_f__Oscillospiraceae	ASV2552	0	0	0	0	0	5	0	0	0	0	0	0	0	0	0	0	0	0	0	0	0	0	0	0
d__Bacteria	k__norank_d__Bacteria	p__Firmicutes	c__Clostridia	o__Lachnospirales	f__Lachnospiraceae	g__Lachnospiraceae_NK4A136_group	s__unclassified_g__Lachnospiraceae_NK4A136_group	ASV1818	0	0	0	0	0	0	0	26	0	29	0	0	61	0	0	0	0	0	0	0	0	39	0	0
d__Bacteria	k__norank_d__Bacteria	p__Firmicutes	c__Clostridia	o__Lachnospirales	f__Lachnospiraceae	g__Lachnospiraceae_NK4A136_group	s__unclassified_g__Lachnospiraceae_NK4A136_group	ASV2371	0	0	0	0	0	0	0	0	31	0	0	0	0	0	0	0	0	0	0	0	0	0	0	0
d__Bacteria	k__norank_d__Bacteria	p__Firmicutes	c__Clostridia	o__Oscillospirales	f__Ruminococcaceae	g__norank_f__Ruminococcaceae	s__unclassified_g__norank_f__Ruminococcaceae	ASV2015	0	0	0	3	0	0	0	0	0	0	0	0	0	0	0	0	0	0	0	0	0	0	2	0
d__Bacteria	k__norank_d__Bacteria	p__Firmicutes	c__Clostridia	o__Lachnospirales	f__Lachnospiraceae	g__Tyzzerella	s__unclassified_g__Tyzzerella	ASV2989	0	0	0	0	0	0	0	0	0	0	0	0	0	0	0	0	5	0	0	0	0	0	0	0
d__Bacteria	k__norank_d__Bacteria	p__Bacteroidota	c__Bacteroidia	o__Bacteroidales	f__Muribaculaceae	g__norank_f__Muribaculaceae	s__uncultured_bacterium_g__norank_f__Muribaculaceae	ASV2485	0	0	0	0	0	0	0	0	0	0	5	0	0	0	0	0	0	0	0	0	0	0	0	0
d__Bacteria	k__norank_d__Bacteria	p__Bacteroidota	c__Bacteroidia	o__Bacteroidales	f__Muribaculaceae	g__norank_f__Muribaculaceae	s__uncultured_bacterium_g__norank_f__Muribaculaceae	ASV1354	0	0	0	0	0	0	0	0	0	0	0	20	0	0	0	0	0	0	0	0	0	0	0	0
d__Bacteria	k__norank_d__Bacteria	p__Firmicutes	c__Clostridia	o__Oscillospirales	f__Ruminococcaceae	g__norank_f__Ruminococcaceae	s__unclassified_g__norank_f__Ruminococcaceae	ASV2017	0	0	0	2	0	0	0	0	0	0	0	0	0	0	0	0	1	0	0	0	0	0	0	0
d__Bacteria	k__norank_d__Bacteria	p__Bacteroidota	c__Bacteroidia	o__Bacteroidales	f__Muribaculaceae	g__norank_f__Muribaculaceae	s__uncultured_bacterium_g__norank_f__Muribaculaceae	ASV914	0	0	0	0	0	0	0	0	0	0	0	0	0	0	0	0	0	0	0	0	0	0	0	2
d__Bacteria	k__norank_d__Bacteria	p__Bacteroidota	c__Bacteroidia	o__Bacteroidales	f__Muribaculaceae	g__norank_f__Muribaculaceae	s__uncultured_bacterium_g__norank_f__Muribaculaceae	ASV918	13	7	0	0	13	16	0	0	7	14	14	23	3	33	13	0	13	20	26	34	0	15	6	0
d__Bacteria	k__norank_d__Bacteria	p__Bacteroidota	c__Bacteroidia	o__Bacteroidales	f__Muribaculaceae	g__norank_f__Muribaculaceae	s__uncultured_bacterium_g__norank_f__Muribaculaceae	ASV919	0	0	0	0	0	0	0	0	0	0	0	0	0	0	0	0	0	0	0	0	0	0	0	1
d__Bacteria	k__norank_d__Bacteria	p__Firmicutes	c__Clostridia	o__Lachnospirales	f__Lachnospiraceae	g__unclassified_f__Lachnospiraceae	s__unclassified_f__Lachnospiraceae	ASV1212	0	0	0	7	9	4	0	0	12	13	0	0	0	0	0	0	0	0	0	0	0	0	0	0
d__Bacteria	k__norank_d__Bacteria	p__Firmicutes	c__Clostridia	o__Oscillospirales	f__Ruminococcaceae	g__Ruminococcus	s__unclassified_g__Ruminococcus	ASV3031	149	0	0	0	0	0	0	0	0	0	0	0	0	0	0	0	0	0	0	0	0	0	0	0
d__Bacteria	k__norank_d__Bacteria	p__Firmicutes	c__Clostridia	o__Oscillospirales	f__Oscillospiraceae	g__unclassified_f__Oscillospiraceae	s__unclassified_f__Oscillospiraceae	ASV2424	0	0	0	0	0	0	0	0	4	0	0	0	0	0	0	0	0	0	0	0	0	0	0	0
d__Bacteria	k__norank_d__Bacteria	p__Firmicutes	c__Clostridia	o__Lachnospirales	f__Lachnospiraceae	g__Lachnospiraceae_NK4A136_group	s__unclassified_g__Lachnospiraceae_NK4A136_group	ASV1497	0	0	0	0	0	0	0	0	0	0	0	0	0	0	0	0	0	0	23	0	0	0	0	0
d__Bacteria	k__norank_d__Bacteria	p__Firmicutes	c__Clostridia	o__norank_c__Clostridia	f__norank_o__norank_c__Clostridia	g__norank_f__norank_o__norank_c__Clostridia	s__unclassified_g__norank_f__norank_o__norank_c__Clostridia	ASV1903	0	0	0	0	0	0	0	0	0	0	5	0	0	0	0	0	0	0	0	0	0	3	0	0
d__Bacteria	k__norank_d__Bacteria	p__Bacteroidota	c__Bacteroidia	o__Bacteroidales	f__Muribaculaceae	g__norank_f__Muribaculaceae	s__uncultured_bacterium_g__norank_f__Muribaculaceae	ASV864	0	0	0	0	0	0	0	0	0	0	0	0	0	11	0	0	0	0	10	0	0	0	0	6
d__Bacteria	k__norank_d__Bacteria	p__Firmicutes	c__Clostridia	o__Lachnospirales	f__Lachnospiraceae	g__Lachnospiraceae_NK4A136_group	s__unclassified_g__Lachnospiraceae_NK4A136_group	ASV2971	0	0	0	0	0	0	0	0	0	0	0	0	0	0	0	0	27	0	0	0	0	0	0	0
d__Bacteria	k__norank_d__Bacteria	p__Bacteroidota	c__Bacteroidia	o__Bacteroidales	f__Muribaculaceae	g__norank_f__Muribaculaceae	s__uncultured_bacterium_g__norank_f__Muribaculaceae	ASV860	6	8	0	0	3	3	6	4	0	1	8	4	5	0	8	0	8	0	0	8	0	0	2	7
d__Bacteria	k__norank_d__Bacteria	p__Bacteroidota	c__Bacteroidia	o__Bacteroidales	f__Muribaculaceae	g__norank_f__Muribaculaceae	s__uncultured_bacterium_g__norank_f__Muribaculaceae	ASV862	0	0	0	0	0	0	0	0	6	0	0	0	0	0	0	0	0	0	0	0	0	0	0	7
d__Bacteria	k__norank_d__Bacteria	p__Bacteroidota	c__Bacteroidia	o__Bacteroidales	f__Muribaculaceae	g__norank_f__Muribaculaceae	s__uncultured_bacterium_g__norank_f__Muribaculaceae	ASV863	0	0	0	0	0	0	0	0	0	0	0	0	0	0	0	0	0	0	0	0	0	0	0	8
d__Bacteria	k__norank_d__Bacteria	p__Bacteroidota	c__Bacteroidia	o__Bacteroidales	f__Muribaculaceae	g__norank_f__Muribaculaceae	s__unclassified_g__norank_f__Muribaculaceae	ASV2387	0	0	0	0	0	0	0	0	19	0	0	32	0	0	38	0	0	0	0	0	0	0	0	0
d__Bacteria	k__norank_d__Bacteria	p__Firmicutes	c__Clostridia	o__Lachnospirales	f__Lachnospiraceae	g__Roseburia	s__unclassified_g__Roseburia	ASV2089	0	0	0	0	0	35	0	0	0	9	0	0	0	0	0	0	0	0	0	0	0	0	0	0
d__Bacteria	k__norank_d__Bacteria	p__Bacteroidota	c__Bacteroidia	o__Bacteroidales	f__Muribaculaceae	g__norank_f__Muribaculaceae	s__uncultured_bacterium_g__norank_f__Muribaculaceae	ASV869	0	4	0	0	0	0	0	0	0	20	0	0	0	0	0	20	0	14	0	0	0	0	0	5
d__Bacteria	k__norank_d__Bacteria	p__Firmicutes	c__Clostridia	o__Oscillospirales	f__Ruminococcaceae	g__Harryflintia	s__uncultured_bacterium_g__Harryflintia	ASV907	0	0	0	0	0	0	0	0	2	0	0	0	0	0	0	0	0	0	0	0	0	0	0	2
d__Bacteria	k__norank_d__Bacteria	p__Bacteroidota	c__Bacteroidia	o__Bacteroidales	f__Muribaculaceae	g__norank_f__Muribaculaceae	s__unclassified_g__norank_f__Muribaculaceae	ASV360	0	2	9	4	1	6	0	0	2	0	6	4	0	0	0	6	0	5	9	0	5	10	0	3
d__Bacteria	k__norank_d__Bacteria	p__Firmicutes	c__Clostridia	o__Lachnospirales	f__Lachnospiraceae	g__unclassified_f__Lachnospiraceae	s__unclassified_f__Lachnospiraceae	ASV2331	0	0	10	0	0	0	0	0	0	0	0	0	0	0	0	0	0	0	0	0	0	0	0	0
d__Bacteria	k__norank_d__Bacteria	p__Firmicutes	c__Clostridia	o__Oscillospirales	f__unclassified_o__Oscillospirales	g__unclassified_o__Oscillospirales	s__unclassified_o__Oscillospirales	ASV2030	0	0	0	2	0	0	0	0	0	0	0	0	0	0	0	0	0	0	0	0	0	0	0	0
d__Bacteria	k__norank_d__Bacteria	p__Firmicutes	c__Bacilli	o__Lactobacillales	f__Lactobacillaceae	g__Lactobacillus	s__unclassified_g__Lactobacillus	ASV2460	0	18	0	0	0	0	0	0	0	0	17	0	0	0	0	0	0	0	0	0	0	0	0	0
d__Bacteria	k__norank_d__Bacteria	p__Firmicutes	c__Clostridia	o__Lachnospirales	f__Lachnospiraceae	g__Lachnospiraceae_NK4A136_group	s__unclassified_g__Lachnospiraceae_NK4A136_group	ASV2754	0	104	0	0	0	0	0	128	0	0	0	0	0	0	0	0	0	0	0	0	0	0	0	0
d__Bacteria	k__norank_d__Bacteria	p__Firmicutes	c__Clostridia	o__Lachnospirales	f__Lachnospiraceae	g__Lachnospiraceae_NK4A136_group	s__unclassified_g__Lachnospiraceae_NK4A136_group	ASV2756	0	0	0	0	0	0	0	31	0	0	0	0	0	0	0	0	0	0	0	0	0	0	0	0
d__Bacteria	k__norank_d__Bacteria	p__Firmicutes	c__Clostridia	o__Lachnospirales	f__Lachnospiraceae	g__Lachnospiraceae_NK4A136_group	s__unclassified_g__Lachnospiraceae_NK4A136_group	ASV2757	0	0	0	0	0	0	0	26	0	0	0	0	0	0	0	0	0	0	0	0	0	0	0	0
d__Bacteria	k__norank_d__Bacteria	p__Firmicutes	c__Clostridia	o__Lachnospirales	f__Lachnospiraceae	g__Lachnospiraceae_UCG-006	s__uncultured_bacterium_g__Lachnospiraceae_UCG-006	ASV2900	0	16	0	0	0	0	0	0	0	0	0	0	0	0	0	0	28	0	0	0	0	0	0	0
d__Bacteria	k__norank_d__Bacteria	p__Firmicutes	c__Clostridia	o__Lachnospirales	f__Lachnospiraceae	g__unclassified_f__Lachnospiraceae	s__unclassified_f__Lachnospiraceae	ASV965	0	0	0	0	0	0	0	0	0	0	0	0	0	0	18	0	0	0	42	0	0	0	0	0
d__Bacteria	k__norank_d__Bacteria	p__Firmicutes	c__Clostridia	o__Oscillospirales	f__Ruminococcaceae	g__norank_f__Ruminococcaceae	s__unclassified_g__norank_f__Ruminococcaceae	ASV2763	0	0	0	0	0	0	0	20	0	0	0	0	14	0	0	0	0	0	0	0	0	0	0	0
d__Bacteria	k__norank_d__Bacteria	p__Firmicutes	c__Clostridia	o__Oscillospirales	f__Oscillospiraceae	g__unclassified_f__Oscillospiraceae	s__unclassified_f__Oscillospiraceae	ASV2775	0	0	0	0	0	0	0	9	0	0	0	0	0	0	0	0	0	0	0	0	0	0	0	0
d__Bacteria	k__norank_d__Bacteria	p__Firmicutes	c__Clostridia	o__Lachnospirales	f__Lachnospiraceae	g__unclassified_f__Lachnospiraceae	s__unclassified_f__Lachnospiraceae	ASV2405	0	0	0	0	0	0	0	0	5	0	0	0	0	0	0	0	0	0	0	0	0	0	0	0
d__Bacteria	k__norank_d__Bacteria	p__Firmicutes	c__Clostridia	o__Lachnospirales	f__Lachnospiraceae	g__unclassified_f__Lachnospiraceae	s__unclassified_f__Lachnospiraceae	ASV2406	0	0	0	0	0	0	0	0	5	0	0	0	0	0	0	0	0	0	0	0	0	0	7	0
d__Bacteria	k__norank_d__Bacteria	p__Firmicutes	c__Clostridia	o__Lachnospirales	f__Lachnospiraceae	g__unclassified_f__Lachnospiraceae	s__unclassified_f__Lachnospiraceae	ASV2407	0	0	0	0	0	0	0	0	6	0	0	0	0	0	0	0	7	0	0	0	0	0	0	0
d__Bacteria	k__norank_d__Bacteria	p__Firmicutes	c__Bacilli	o__Lactobacillales	f__Lactobacillaceae	g__Lactobacillus	s__unclassified_g__Lactobacillus	ASV2840	0	0	0	0	0	0	0	0	0	0	0	0	0	0	4	0	0	0	0	0	0	0	0	0
d__Bacteria	k__norank_d__Bacteria	p__Firmicutes	c__Clostridia	o__Lachnospirales	f__Lachnospiraceae	g__unclassified_f__Lachnospiraceae	s__unclassified_f__Lachnospiraceae	ASV2402	0	0	0	0	0	0	0	0	10	0	0	4	4	0	0	0	8	0	0	0	0	0	0	0
d__Bacteria	k__norank_d__Bacteria	p__Actinobacteriota	c__Coriobacteriia	o__Coriobacteriales	f__Eggerthellaceae	g__Adlercreutzia	s__unclassified_g__Adlercreutzia	ASV2259	10	0	0	0	0	0	0	0	0	0	0	0	0	17	0	0	0	0	0	0	0	0	0	0
d__Bacteria	k__norank_d__Bacteria	p__Firmicutes	c__Clostridia	o__Oscillospirales	f__Ruminococcaceae	g__unclassified_f__Ruminococcaceae	s__unclassified_f__Ruminococcaceae	ASV1706	0	0	0	3	0	0	3	5	0	5	0	0	2	0	0	0	0	3	0	0	0	9	0	0
d__Bacteria	k__norank_d__Bacteria	p__Cyanobacteria	c__Vampirivibrionia	o__Gastranaerophilales	f__norank_o__Gastranaerophilales	g__norank_f__norank_o__Gastranaerophilales	s__uncultured_bacterium_g__norank_f__norank_o__Gastranaerophilales	ASV3030	0	0	0	0	0	0	0	0	0	0	0	2	0	0	0	0	0	0	0	0	0	0	0	0
d__Bacteria	k__norank_d__Bacteria	p__Firmicutes	c__Clostridia	o__Oscillospirales	f__Ruminococcaceae	g__unclassified_f__Ruminococcaceae	s__unclassified_f__Ruminococcaceae	ASV876	0	8	0	0	0	4	7	12	5	0	0	0	0	0	0	0	0	0	0	0	3	0	0	7
d__Bacteria	k__norank_d__Bacteria	p__Firmicutes	c__Clostridia	o__Oscillospirales	f__Oscillospiraceae	g__unclassified_f__Oscillospiraceae	s__unclassified_f__Oscillospiraceae	ASV2312	0	0	18	0	0	0	0	0	0	0	0	0	0	0	0	0	0	0	0	0	0	0	0	0
d__Bacteria	k__norank_d__Bacteria	p__Bacteroidota	c__Bacteroidia	o__Bacteroidales	f__Muribaculaceae	g__norank_f__Muribaculaceae	s__uncultured_bacterium_g__norank_f__Muribaculaceae	ASV3042	34	0	0	0	0	0	0	0	0	0	0	0	0	0	0	0	0	0	0	0	0	0	0	0
d__Bacteria	k__norank_d__Bacteria	p__Actinobacteriota	c__Actinobacteria	o__Corynebacteriales	f__Corynebacteriaceae	g__Corynebacterium	s__unclassified_g__Corynebacterium	ASV2228	0	0	0	0	0	0	0	0	0	0	0	0	0	0	0	0	0	0	0	5	0	0	4	0
d__Bacteria	k__norank_d__Bacteria	p__Firmicutes	c__Clostridia	o__Peptococcales	f__Peptococcaceae	g__Peptococcus	s__uncultured_bacterium_g__Peptococcus	ASV2807	0	0	0	0	0	0	0	0	0	0	0	0	0	0	0	0	0	30	0	0	0	0	8	0
d__Bacteria	k__norank_d__Bacteria	p__Bacteroidota	c__Bacteroidia	o__Bacteroidales	f__Muribaculaceae	g__norank_f__Muribaculaceae	s__uncultured_bacterium_g__norank_f__Muribaculaceae	ASV3046	25	0	0	0	0	0	0	0	0	0	0	0	0	0	0	0	0	0	0	0	0	0	0	0
d__Bacteria	k__norank_d__Bacteria	p__Firmicutes	c__Clostridia	o__Lachnospirales	f__Lachnospiraceae	g__unclassified_f__Lachnospiraceae	s__unclassified_f__Lachnospiraceae	ASV2085	0	0	0	0	0	0	0	0	0	13	0	0	0	0	0	0	0	0	0	0	0	0	0	0
d__Bacteria	k__norank_d__Bacteria	p__Firmicutes	c__Clostridia	o__Lachnospirales	f__Lachnospiraceae	g__unclassified_f__Lachnospiraceae	s__unclassified_f__Lachnospiraceae	ASV2086	0	0	1	0	0	0	0	11	0	12	0	0	0	0	0	0	0	0	0	9	0	0	0	0
d__Bacteria	k__norank_d__Bacteria	p__Bacteroidota	c__Bacteroidia	o__Bacteroidales	f__Muribaculaceae	g__norank_f__Muribaculaceae	s__uncultured_bacterium_g__norank_f__Muribaculaceae	ASV3045	30	0	0	0	0	0	0	0	0	0	0	0	0	0	0	0	0	0	0	0	0	0	0	0
d__Bacteria	k__norank_d__Bacteria	p__Firmicutes	c__Clostridia	o__Lachnospirales	f__Lachnospiraceae	g__unclassified_f__Lachnospiraceae	s__unclassified_f__Lachnospiraceae	ASV2088	0	0	0	0	0	0	0	11	0	9	0	0	0	0	0	3	0	0	0	0	0	0	0	0
d__Bacteria	k__norank_d__Bacteria	p__Bacteroidota	c__Bacteroidia	o__Bacteroidales	f__Muribaculaceae	g__norank_f__Muribaculaceae	s__uncultured_bacterium_g__norank_f__Muribaculaceae	ASV3048	22	0	0	0	0	0	0	0	0	0	0	0	0	0	0	0	0	0	0	0	0	0	0	0
d__Bacteria	k__norank_d__Bacteria	p__Bacteroidota	c__Bacteroidia	o__Bacteroidales	f__Muribaculaceae	g__norank_f__Muribaculaceae	s__uncultured_bacterium_g__norank_f__Muribaculaceae	ASV3049	23	0	0	0	0	0	0	0	0	0	0	0	0	0	0	0	0	0	0	0	0	0	0	0
d__Bacteria	k__norank_d__Bacteria	p__Firmicutes	c__Bacilli	o__Erysipelotrichales	f__Erysipelotrichaceae	g__unclassified_f__Erysipelotrichaceae	s__unclassified_f__Erysipelotrichaceae	ASV3057	10	0	0	0	0	0	0	0	0	0	0	0	0	0	0	0	0	0	0	0	0	0	0	0
d__Bacteria	k__norank_d__Bacteria	p__Firmicutes	c__Clostridia	o__Lachnospirales	f__Lachnospiraceae	g__unclassified_f__Lachnospiraceae	s__unclassified_f__Lachnospiraceae	ASV2311	0	0	15	0	0	0	0	0	0	0	0	0	0	0	0	0	17	0	0	0	0	0	0	0
d__Bacteria	k__norank_d__Bacteria	p__Bacteroidota	c__Bacteroidia	o__Bacteroidales	f__Muribaculaceae	g__norank_f__Muribaculaceae	s__unclassified_g__norank_f__Muribaculaceae	ASV643	79	44	92	56	28	103	48	107	25	20	13	0	83	2	68	9	80	60	55	87	138	6	51	53
d__Bacteria	k__norank_d__Bacteria	p__Bacteroidota	c__Bacteroidia	o__Bacteroidales	f__Rikenellaceae	g__Alistipes	s__uncultured_bacterium_g__Alistipes	ASV856	0	3	0	0	15	17	3	21	40	0	0	7	3	3	0	5	13	0	22	21	0	17	16	7
d__Bacteria	k__norank_d__Bacteria	p__Firmicutes	c__Clostridia	o__Lachnospirales	f__Lachnospiraceae	g__unclassified_f__Lachnospiraceae	s__unclassified_f__Lachnospiraceae	ASV2315	0	0	14	0	0	0	0	0	0	0	0	0	0	0	0	0	0	0	0	0	0	0	0	0
d__Bacteria	k__norank_d__Bacteria	p__Bacteroidota	c__Bacteroidia	o__Bacteroidales	f__Muribaculaceae	g__norank_f__Muribaculaceae	s__unclassified_g__norank_f__Muribaculaceae	ASV741	14	19	0	0	0	0	23	13	0	19	9	28	22	9	47	0	23	37	8	58	37	18	32	21
d__Bacteria	k__norank_d__Bacteria	p__Firmicutes	c__Clostridia	o__Lachnospirales	f__Lachnospiraceae	g__unclassified_f__Lachnospiraceae	s__unclassified_f__Lachnospiraceae	ASV910	0	0	0	3	0	0	0	2	0	0	0	0	1	0	0	0	0	0	0	0	0	6	0	3
d__Bacteria	k__norank_d__Bacteria	p__Firmicutes	c__Clostridia	o__Lachnospirales	f__Lachnospiraceae	g__unclassified_f__Lachnospiraceae	s__unclassified_f__Lachnospiraceae	ASV1504	20	0	0	14	0	0	0	0	0	0	0	0	0	0	0	0	0	0	25	0	0	0	24	0
d__Bacteria	k__norank_d__Bacteria	p__Bacteroidota	c__Bacteroidia	o__Bacteroidales	f__Muribaculaceae	g__norank_f__Muribaculaceae	s__uncultured_bacterium_g__norank_f__Muribaculaceae	ASV1825	0	0	0	0	0	0	0	0	0	0	0	0	0	0	0	0	0	0	0	0	0	30	0	0
d__Bacteria	k__norank_d__Bacteria	p__Firmicutes	c__Clostridia	o__Oscillospirales	f__Oscillospiraceae	g__unclassified_f__Oscillospiraceae	s__unclassified_f__Oscillospiraceae	ASV2792	0	0	0	0	0	0	0	3	0	0	0	0	0	0	0	0	0	0	0	0	0	0	0	0
d__Bacteria	k__norank_d__Bacteria	p__Bacteroidota	c__Bacteroidia	o__Bacteroidales	f__Bacteroidaceae	g__Bacteroides	s__uncultured_bacterium_g__Bacteroides	ASV2083	0	0	0	0	0	0	0	0	0	12	0	0	0	0	0	0	0	8	0	0	0	0	0	0
d__Bacteria	k__norank_d__Bacteria	p__Firmicutes	c__Clostridia	o__Oscillospirales	f__Ruminococcaceae	g__unclassified_f__Ruminococcaceae	s__unclassified_f__Ruminococcaceae	ASV906	0	0	0	2	0	0	0	0	0	0	0	0	0	0	0	0	0	0	0	0	0	0	0	4
d__Bacteria	k__norank_d__Bacteria	p__Bacteroidota	c__Bacteroidia	o__Bacteroidales	f__Muribaculaceae	g__norank_f__Muribaculaceae	s__uncultured_bacterium_g__norank_f__Muribaculaceae	ASV1829	0	0	0	0	0	31	0	0	0	0	10	0	0	0	38	0	0	0	0	0	0	29	0	0
d__Bacteria	k__norank_d__Bacteria	p__Firmicutes	c__Clostridia	o__Lachnospirales	f__Lachnospiraceae	g__Eubacterium_ruminantium_group	s__uncultured_bacterium_g__Eubacterium_ruminantium_group	ASV2279	0	0	408	0	0	0	0	0	0	0	0	0	0	0	0	345	0	0	0	0	0	0	96	0
d__Bacteria	k__norank_d__Bacteria	p__Firmicutes	c__Clostridia	o__Lachnospirales	f__Lachnospiraceae	g__Lachnospiraceae_UCG-006	s__uncultured_bacterium_g__Lachnospiraceae_UCG-006	ASV1280	0	0	0	0	0	0	34	0	0	0	0	0	0	0	0	0	0	0	0	0	0	0	0	0
d__Bacteria	k__norank_d__Bacteria	p__Firmicutes	c__Bacilli	o__Erysipelotrichales	f__Erysipelotrichaceae	g__Faecalibaculum	s__uncultured_bacterium_g__Faecalibaculum	ASV1168	0	0	0	0	25	0	0	0	0	0	0	0	0	20	0	0	0	0	0	0	0	0	18	0
d__Bacteria	k__norank_d__Bacteria	p__Firmicutes	c__Clostridia	o__Lachnospirales	f__Lachnospiraceae	g__unclassified_f__Lachnospiraceae	s__unclassified_f__Lachnospiraceae	ASV580	4	12	0	5	0	0	7	7	0	0	0	7	0	0	0	0	0	0	8	9	0	14	0	7
d__Bacteria	k__norank_d__Bacteria	p__Bacteroidota	c__Bacteroidia	o__Bacteroidales	f__Muribaculaceae	g__norank_f__Muribaculaceae	s__uncultured_bacterium_g__norank_f__Muribaculaceae	ASV1213	0	0	0	0	9	0	0	0	0	0	0	0	0	0	0	0	0	0	0	0	0	0	0	0
d__Bacteria	k__norank_d__Bacteria	p__Bacteroidota	c__Bacteroidia	o__Bacteroidales	f__Muribaculaceae	g__norank_f__Muribaculaceae	s__uncultured_bacterium_g__norank_f__Muribaculaceae	ASV2920	0	0	0	0	0	0	0	0	0	0	0	0	6	0	0	0	0	0	0	0	0	0	0	0
d__Bacteria	k__norank_d__Bacteria	p__Firmicutes	c__Clostridia	o__Oscillospirales	f__Ruminococcaceae	g__Eubacterium_siraeum_group	s__uncultured_bacterium_g__Eubacterium_siraeum_group	ASV1144	0	0	0	0	53	0	0	0	0	0	0	0	0	0	252	0	0	0	0	0	0	0	0	0
d__Bacteria	k__norank_d__Bacteria	p__Firmicutes	c__Bacilli	o__RF39	f__norank_o__RF39	g__norank_f__norank_o__RF39	s__unclassified_g__norank_f__norank_o__RF39	ASV858	0	0	0	0	0	0	0	0	0	0	0	0	0	0	0	0	0	0	0	0	0	0	0	7
d__Bacteria	k__norank_d__Bacteria	p__Patescibacteria	c__Saccharimonadia	o__Saccharimonadales	f__Saccharimonadaceae	g__Candidatus_Saccharimonas	s__uncultured_bacterium_g__Candidatus_Saccharimonas	ASV816	0	0	0	0	0	0	0	0	0	0	0	0	0	0	0	0	0	0	0	0	0	0	0	9
d__Bacteria	k__norank_d__Bacteria	p__Firmicutes	c__Negativicutes	o__Veillonellales-Selenomonadales	f__Selenomonadaceae	g__Quinella	s__uncultured_bacterium_g__Quinella	ASV647	44	30	15	82	24	45	28	81	54	47	4	0	56	13	24	72	56	9	26	54	29	56	149	48
d__Bacteria	k__norank_d__Bacteria	p__Campilobacterota	c__Campylobacteria	o__Campylobacterales	f__Helicobacteraceae	g__Helicobacter	s__unclassified_g__Helicobacter	ASV2874	0	0	0	0	0	0	0	0	0	0	0	0	0	0	0	0	0	5	0	0	0	0	0	0
d__Bacteria	k__norank_d__Bacteria	p__Bacteroidota	c__Bacteroidia	o__Bacteroidales	f__Muribaculaceae	g__norank_f__Muribaculaceae	s__gut_metagenome_g__norank_f__Muribaculaceae	ASV1461	159	0	0	7	0	8	0	0	11	0	0	17	0	89	0	9	0	0	71	0	0	30	0	0
d__Bacteria	k__norank_d__Bacteria	p__Firmicutes	c__Clostridia	o__Lachnospirales	f__Lachnospiraceae	g__unclassified_f__Lachnospiraceae	s__unclassified_f__Lachnospiraceae	ASV639	7	46	66	33	0	23	22	48	8	19	22	14	32	19	15	8	77	60	17	0	8	38	35	51
d__Bacteria	k__norank_d__Bacteria	p__Firmicutes	c__Clostridia	o__Lachnospirales	f__Lachnospiraceae	g__Lachnospiraceae_NK4A136_group	s__uncultured_Clostridiales_bacterium_g__Lachnospiraceae_NK4A136_group	ASV705	0	18	16	40	0	0	0	21	0	0	0	0	0	0	0	0	26	0	0	0	0	0	51	21
d__Bacteria	k__norank_d__Bacteria	p__Firmicutes	c__Clostridia	o__Lachnospirales	f__Lachnospiraceae	g__unclassified_f__Lachnospiraceae	s__unclassified_f__Lachnospiraceae	ASV632	0	196	0	0	0	0	0	138	0	0	0	0	0	0	24	0	0	0	0	0	0	0	0	54
d__Bacteria	k__norank_d__Bacteria	p__Firmicutes	c__Clostridia	o__Lachnospirales	f__Lachnospiraceae	g__unclassified_f__Lachnospiraceae	s__unclassified_f__Lachnospiraceae	ASV631	28	20	9	29	0	0	18	84	0	34	0	7	16	4	0	0	12	0	0	0	0	15	15	74
d__Bacteria	k__norank_d__Bacteria	p__Bacteroidota	c__Bacteroidia	o__Bacteroidales	f__Muribaculaceae	g__norank_f__Muribaculaceae	s__uncultured_bacterium_g__norank_f__Muribaculaceae	ASV2810	0	0	0	0	0	0	0	0	0	0	0	0	0	0	0	0	0	0	0	0	0	0	8	0
d__Bacteria	k__norank_d__Bacteria	p__Firmicutes	c__Bacilli	o__unclassified_c__Bacilli	f__unclassified_c__Bacilli	g__unclassified_c__Bacilli	s__unclassified_c__Bacilli	ASV657	31	39	0	12	0	30	0	30	18	25	0	0	0	0	0	22	23	0	19	19	21	0	0	39
d__Bacteria	k__norank_d__Bacteria	p__Firmicutes	c__Clostridia	o__Lachnospirales	f__Lachnospiraceae	g__unclassified_f__Lachnospiraceae	s__unclassified_f__Lachnospiraceae	ASV903	0	30	0	0	0	0	0	24	13	0	0	0	0	0	0	0	0	0	0	0	0	0	0	3
d__Bacteria	k__norank_d__Bacteria	p__Bacteroidota	c__Bacteroidia	o__Bacteroidales	f__Muribaculaceae	g__norank_f__Muribaculaceae	s__uncultured_bacterium_g__norank_f__Muribaculaceae	ASV3009	0	0	0	0	0	0	0	0	0	0	0	17	0	0	0	0	0	0	0	0	0	0	0	0
d__Bacteria	k__norank_d__Bacteria	p__Campilobacterota	c__Campylobacteria	o__Campylobacterales	f__Helicobacteraceae	g__Helicobacter	s__unclassified_g__Helicobacter	ASV2498	0	0	0	0	0	0	0	0	0	0	4	0	0	0	0	3	0	0	0	0	0	0	0	0
d__Bacteria	k__norank_d__Bacteria	p__Firmicutes	c__Clostridia	o__Clostridia_UCG-014	f__norank_o__Clostridia_UCG-014	g__norank_f__norank_o__Clostridia_UCG-014	s__unclassified_g__norank_f__norank_o__Clostridia_UCG-014	ASV2480	0	0	0	0	0	0	0	0	0	0	9	0	0	0	0	0	0	0	0	0	0	0	0	0
d__Bacteria	k__norank_d__Bacteria	p__Firmicutes	c__Bacilli	o__Lactobacillales	f__Lactobacillaceae	g__Lactobacillus	s__unclassified_g__Lactobacillus	ASV1130	49	0	0	0	157	0	62	0	0	0	0	0	0	0	0	40	0	0	0	0	0	0	0	0
d__Bacteria	k__norank_d__Bacteria	p__Firmicutes	c__Bacilli	o__Lactobacillales	f__Lactobacillaceae	g__Lactobacillus	s__unclassified_g__Lactobacillus	ASV1131	34	0	0	0	133	0	63	0	0	0	0	0	0	0	0	49	0	0	0	0	0	0	0	0
d__Bacteria	k__norank_d__Bacteria	p__Firmicutes	c__Bacilli	o__Lactobacillales	f__Lactobacillaceae	g__Lactobacillus	s__unclassified_g__Lactobacillus	ASV1132	44	0	0	0	131	0	46	0	0	0	0	0	0	0	0	51	0	0	0	0	0	0	0	0
d__Bacteria	k__norank_d__Bacteria	p__Firmicutes	c__Bacilli	o__Lactobacillales	f__Lactobacillaceae	g__Lactobacillus	s__unclassified_g__Lactobacillus	ASV1133	0	0	0	0	123	0	0	0	0	0	0	0	0	0	0	0	0	0	0	0	0	0	0	0
d__Bacteria	k__norank_d__Bacteria	p__Bacteroidota	c__Bacteroidia	o__Bacteroidales	f__Muribaculaceae	g__norank_f__Muribaculaceae	s__uncultured_bacterium_g__norank_f__Muribaculaceae	ASV729	0	0	0	0	0	0	0	0	0	0	0	0	0	0	0	0	0	0	0	0	0	0	0	19
d__Bacteria	k__norank_d__Bacteria	p__Firmicutes	c__Bacilli	o__Lactobacillales	f__Lactobacillaceae	g__Lactobacillus	s__unclassified_g__Lactobacillus	ASV1136	0	0	0	0	76	0	0	0	0	0	0	0	0	0	0	0	0	0	0	0	0	0	0	0
d__Bacteria	k__norank_d__Bacteria	p__Firmicutes	c__Clostridia	o__Clostridia_UCG-014	f__norank_o__Clostridia_UCG-014	g__norank_f__norank_o__Clostridia_UCG-014	s__unclassified_g__norank_f__norank_o__Clostridia_UCG-014	ASV2799	0	0	0	0	0	0	0	0	0	0	0	0	0	0	0	0	0	0	0	0	0	0	31	0
d__Bacteria	k__norank_d__Bacteria	p__Bacteroidota	c__Bacteroidia	o__Bacteroidales	f__Muribaculaceae	g__norank_f__Muribaculaceae	s__unclassified_g__norank_f__Muribaculaceae	ASV2708	0	0	0	0	0	0	0	0	0	0	0	0	0	0	0	31	0	0	0	0	0	0	0	0
d__Bacteria	k__norank_d__Bacteria	p__Firmicutes	c__Clostridia	o__Lachnospirales	f__Lachnospiraceae	g__Lachnospiraceae_NK4A136_group	s__unclassified_g__Lachnospiraceae_NK4A136_group	ASV615	0	23	982	1080	0	0	0	930	0	979	0	0	0	0	0	0	0	380	0	350	350	0	0	427
d__Bacteria	k__norank_d__Bacteria	p__Firmicutes	c__Clostridia	o__Oscillospirales	f__Oscillospiraceae	g__norank_f__Oscillospiraceae	s__uncultured_bacterium_g__norank_f__Oscillospiraceae	ASV1874	0	0	0	0	0	14	0	0	0	0	0	0	0	0	0	19	0	0	0	0	0	11	0	0
d__Bacteria	k__norank_d__Bacteria	p__Firmicutes	c__Bacilli	o__Bacillales	f__Bacillaceae	g__unclassified_f__Bacillaceae	s__unclassified_f__Bacillaceae	ASV2321	0	0	9	0	0	0	0	0	0	0	0	0	0	0	0	0	0	0	0	0	0	0	0	0
d__Bacteria	k__norank_d__Bacteria	p__Firmicutes	c__Clostridia	o__Clostridia_UCG-014	f__norank_o__Clostridia_UCG-014	g__norank_f__norank_o__Clostridia_UCG-014	s__unclassified_g__norank_f__norank_o__Clostridia_UCG-014	ASV2316	0	0	12	0	0	0	0	0	0	0	0	0	0	0	0	0	0	0	0	0	0	0	0	0
d__Bacteria	k__norank_d__Bacteria	p__Bacteroidota	c__Bacteroidia	o__Bacteroidales	f__Muribaculaceae	g__norank_f__Muribaculaceae	s__uncultured_bacterium_g__norank_f__Muribaculaceae	ASV2036	0	0	0	1	0	0	0	0	0	0	0	0	0	0	0	0	0	0	0	0	0	0	0	0
d__Bacteria	k__norank_d__Bacteria	p__Bacteroidota	c__Bacteroidia	o__Bacteroidales	f__Muribaculaceae	g__norank_f__Muribaculaceae	s__uncultured_bacterium_g__norank_f__Muribaculaceae	ASV1173	0	0	0	0	24	0	25	0	0	0	0	0	9	0	0	0	22	0	0	0	0	0	0	0
d__Bacteria	k__norank_d__Bacteria	p__Bacteroidota	c__Bacteroidia	o__Bacteroidales	f__Muribaculaceae	g__norank_f__Muribaculaceae	s__uncultured_bacterium_g__norank_f__Muribaculaceae	ASV2031	0	0	2	3	0	2	0	3	4	0	7	3	0	0	0	3	3	3	0	11	5	0	0	0
d__Bacteria	k__norank_d__Bacteria	p__Bacteroidota	c__Bacteroidia	o__Bacteroidales	f__Muribaculaceae	g__norank_f__Muribaculaceae	s__unclassified_g__norank_f__Muribaculaceae	ASV882	0	5	20	11	0	0	13	6	32	0	0	0	3	0	0	0	10	17	0	37	20	0	0	5
d__Bacteria	k__norank_d__Bacteria	p__Bacteroidota	c__Bacteroidia	o__Bacteroidales	f__Muribaculaceae	g__norank_f__Muribaculaceae	s__unclassified_g__norank_f__Muribaculaceae	ASV1149	49	51	9	35	47	50	92	33	70	70	36	0	71	29	74	0	25	121	218	44	61	95	15	0
d__Bacteria	k__norank_d__Bacteria	p__Firmicutes	c__Bacilli	o__RF39	f__norank_o__RF39	g__norank_f__norank_o__RF39	s__uncultured_bacterium_g__norank_f__norank_o__RF39	ASV2028	0	0	0	3	0	0	0	0	0	11	31	0	0	0	0	7	0	3	0	0	44	0	10	0
d__Bacteria	k__norank_d__Bacteria	p__Bacteroidota	c__Bacteroidia	o__Bacteroidales	f__Muribaculaceae	g__norank_f__Muribaculaceae	s__unclassified_g__norank_f__Muribaculaceae	ASV2368	0	0	0	0	0	0	0	0	29	0	0	0	0	0	0	0	0	55	0	0	0	0	21	0
d__Bacteria	k__norank_d__Bacteria	p__Firmicutes	c__Clostridia	o__Monoglobales	f__Monoglobaceae	g__Monoglobus	s__unclassified_g__Monoglobus	ASV763	0	0	0	0	0	0	0	0	0	0	0	0	0	0	0	0	0	0	0	0	11	9	0	16
d__Bacteria	k__norank_d__Bacteria	p__Bacteroidota	c__Bacteroidia	o__Bacteroidales	f__Muribaculaceae	g__norank_f__Muribaculaceae	s__unclassified_g__norank_f__Muribaculaceae	ASV1491	0	0	0	0	0	0	0	0	0	0	0	0	0	0	0	0	0	0	28	77	0	0	0	0
d__Bacteria	k__norank_d__Bacteria	p__Bacteroidota	c__Bacteroidia	o__Bacteroidales	f__Muribaculaceae	g__norank_f__Muribaculaceae	s__unclassified_g__norank_f__Muribaculaceae	ASV1142	0	0	0	0	53	0	73	0	0	0	0	0	0	47	27	0	19	0	0	0	0	0	33	0
d__Bacteria	k__norank_d__Bacteria	p__Firmicutes	c__Clostridia	o__Oscillospirales	f__Ruminococcaceae	g__unclassified_f__Ruminococcaceae	s__unclassified_f__Ruminococcaceae	ASV2428	0	6	0	0	0	0	0	0	2	0	5	0	0	0	0	0	0	0	0	0	0	0	0	0
d__Bacteria	k__norank_d__Bacteria	p__Firmicutes	c__Clostridia	o__Oscillospirales	f__Oscillospiraceae	g__unclassified_f__Oscillospiraceae	s__unclassified_f__Oscillospiraceae	ASV1852	0	0	0	0	0	0	0	0	0	0	0	0	0	0	10	24	0	19	0	0	0	18	10	0
d__Bacteria	k__norank_d__Bacteria	p__Firmicutes	c__Clostridia	o__Lachnospirales	f__Lachnospiraceae	g__unclassified_f__Lachnospiraceae	s__unclassified_f__Lachnospiraceae	ASV2668	0	0	0	0	0	0	0	0	0	0	0	0	0	0	0	0	0	11	0	0	17	0	0	0
d__Bacteria	k__norank_d__Bacteria	p__Firmicutes	c__Clostridia	o__Lachnospirales	f__Lachnospiraceae	g__Blautia	s__Lachnospiraceae_bacterium_DW59	ASV2377	0	0	0	0	0	0	0	0	27	0	0	0	0	0	0	0	0	0	0	0	0	0	0	0
d__Bacteria	k__norank_d__Bacteria	p__Firmicutes	c__Bacilli	o__Lactobacillales	f__Lactobacillaceae	g__Lactobacillus	s__unclassified_g__Lactobacillus	ASV660	43	13	0	0	34	25	0	35	22	0	0	52	39	98	19	0	0	0	14	0	0	0	120	42
d__Bacteria	k__norank_d__Bacteria	p__Desulfobacterota	c__Desulfovibrionia	o__Desulfovibrionales	f__Desulfovibrionaceae	g__Desulfovibrio	s__uncultured_bacterium_g__Desulfovibrio	ASV2301	0	0	18	0	0	0	17	0	6	0	8	0	0	0	0	0	19	9	0	0	0	0	15	0
d__Bacteria	k__norank_d__Bacteria	p__Firmicutes	c__Clostridia	o__Lachnospirales	f__Lachnospiraceae	g__unclassified_f__Lachnospiraceae	s__unclassified_f__Lachnospiraceae	ASV2893	0	25	0	0	0	0	0	0	0	0	0	0	0	0	0	0	0	0	0	0	0	0	0	0
d__Bacteria	k__norank_d__Bacteria	p__Actinobacteriota	c__Coriobacteriia	o__Coriobacteriales	f__Eggerthellaceae	g__Enterorhabdus	s__uncultured_bacterium_g__Enterorhabdus	ASV2029	5	0	0	3	0	0	0	0	4	0	0	0	0	0	0	0	0	0	0	0	0	0	0	0
d__Bacteria	k__norank_d__Bacteria	p__Firmicutes	c__Clostridia	o__Lachnospirales	f__Lachnospiraceae	g__unclassified_f__Lachnospiraceae	s__unclassified_f__Lachnospiraceae	ASV2897	0	14	0	0	0	0	0	0	0	0	0	0	0	0	0	0	0	0	0	0	0	0	0	0
d__Bacteria	k__norank_d__Bacteria	p__Firmicutes	c__Clostridia	o__Lachnospirales	f__Lachnospiraceae	g__unclassified_f__Lachnospiraceae	s__unclassified_f__Lachnospiraceae	ASV2894	0	25	0	0	0	0	0	0	0	0	0	0	0	0	0	0	0	0	0	0	0	0	0	0
d__Bacteria	k__norank_d__Bacteria	p__Firmicutes	c__Clostridia	o__Clostridia_UCG-014	f__norank_o__Clostridia_UCG-014	g__norank_f__norank_o__Clostridia_UCG-014	s__unclassified_g__norank_f__norank_o__Clostridia_UCG-014	ASV2220	0	0	0	0	0	0	0	0	0	0	0	0	0	0	0	0	0	0	0	7	0	0	0	0
d__Bacteria	k__norank_d__Bacteria	p__Firmicutes	c__Clostridia	o__Oscillospirales	f__Ruminococcaceae	g__Ruminococcus	s__unclassified_g__Ruminococcus	ASV830	0	0	42	11	0	23	0	4	0	0	34	0	0	7	39	14	35	0	0	36	0	0	28	12
d__Bacteria	k__norank_d__Bacteria	p__Firmicutes	c__Clostridia	o__Oscillospirales	f__Oscillospiraceae	g__unclassified_f__Oscillospiraceae	s__unclassified_f__Oscillospiraceae	ASV441	26	0	28	0	0	21	26	0	28	33	0	13	13	0	0	30	33	0	27	0	19	20	11	0
d__Bacteria	k__norank_d__Bacteria	p__Firmicutes	c__Clostridia	o__Oscillospirales	f__Oscillospiraceae	g__unclassified_f__Oscillospiraceae	s__unclassified_f__Oscillospiraceae	ASV821	0	0	0	0	0	0	0	0	0	0	0	0	0	0	0	0	0	0	0	0	0	0	12	11
d__Bacteria	k__norank_d__Bacteria	p__Desulfobacterota	c__Desulfovibrionia	o__Desulfovibrionales	f__Desulfovibrionaceae	g__Desulfovibrio	s__unclassified_g__Desulfovibrio	ASV2725	0	0	0	0	0	0	0	0	0	0	0	0	0	0	0	12	0	0	0	0	0	0	0	0
d__Bacteria	k__norank_d__Bacteria	p__Firmicutes	c__Bacilli	o__Lactobacillales	f__Lactobacillaceae	g__Lactobacillus	s__Lactobacillus_coleohominis	ASV160	41	42	27	32	64	50	49	31	28	29	24	59	48	51	33	33	50	7	33	58	49	30	51	41
d__Bacteria	k__norank_d__Bacteria	p__Desulfobacterota	c__Desulfovibrionia	o__Desulfovibrionales	f__Desulfovibrionaceae	g__Desulfovibrio	s__uncultured_bacterium_g__Desulfovibrio	ASV3093	0	0	0	0	0	0	4	0	0	0	0	0	0	0	0	0	0	0	0	0	0	0	0	0
d__Bacteria	k__norank_d__Bacteria	p__Bacteroidota	c__Bacteroidia	o__Bacteroidales	f__Muribaculaceae	g__norank_f__Muribaculaceae	s__uncultured_bacterium_g__norank_f__Muribaculaceae	ASV2448	0	0	0	0	0	0	0	0	0	0	20	0	0	0	0	0	0	0	0	0	0	0	0	0
d__Bacteria	k__norank_d__Bacteria	p__Bacteroidota	c__Bacteroidia	o__Bacteroidales	f__Marinifilaceae	g__Odoribacter	s__unclassified_g__Odoribacter	ASV2395	0	0	0	0	0	0	0	0	12	0	0	0	0	0	0	0	0	0	0	0	0	0	0	0
d__Bacteria	k__norank_d__Bacteria	p__Bacteroidota	c__Bacteroidia	o__Bacteroidales	f__Muribaculaceae	g__norank_f__Muribaculaceae	s__uncultured_bacterium_g__norank_f__Muribaculaceae	ASV65	0	0	43	0	0	0	0	0	0	0	0	0	0	0	0	0	0	0	0	0	0	0	0	0
d__Bacteria	k__norank_d__Bacteria	p__Bacteroidota	c__Bacteroidia	o__Bacteroidales	f__Muribaculaceae	g__norank_f__Muribaculaceae	s__uncultured_bacterium_g__norank_f__Muribaculaceae	ASV60	101	4	0	18	0	135	0	13	27	0	0	0	8	27	7	41	0	0	23	0	62	0	0	0
d__Bacteria	k__norank_d__Bacteria	p__Firmicutes	c__Clostridia	o__Oscillospirales	f__Oscillospiraceae	g__unclassified_f__Oscillospiraceae	s__unclassified_f__Oscillospiraceae	ASV2303	0	0	22	0	0	0	0	0	0	0	39	0	0	0	19	38	0	30	0	0	26	0	28	0
d__Bacteria	k__norank_d__Bacteria	p__Firmicutes	c__Clostridia	o__Oscillospirales	f__Oscillospiraceae	g__unclassified_f__Oscillospiraceae	s__unclassified_f__Oscillospiraceae	ASV2305	0	0	13	0	0	0	41	0	0	0	0	0	0	0	0	0	0	0	0	0	0	0	0	0
d__Bacteria	k__norank_d__Bacteria	p__Bacteroidota	c__Bacteroidia	o__Bacteroidales	f__Muribaculaceae	g__norank_f__Muribaculaceae	s__uncultured_bacterium_g__norank_f__Muribaculaceae	ASV3037	37	0	0	0	0	0	0	0	0	0	0	0	0	0	0	0	0	0	0	0	0	0	0	0
d__Bacteria	k__norank_d__Bacteria	p__Firmicutes	c__Clostridia	o__Lachnospirales	f__Lachnospiraceae	g__unclassified_f__Lachnospiraceae	s__unclassified_f__Lachnospiraceae	ASV2092	0	0	0	0	0	0	0	0	0	10	0	0	0	0	0	0	0	0	0	0	0	0	0	0
d__Bacteria	k__norank_d__Bacteria	p__Firmicutes	c__Clostridia	o__Lachnospirales	f__Lachnospiraceae	g__unclassified_f__Lachnospiraceae	s__unclassified_f__Lachnospiraceae	ASV2090	0	0	0	0	0	0	0	0	0	9	0	0	0	0	0	0	0	0	0	0	0	0	0	0
d__Bacteria	k__norank_d__Bacteria	p__Bacteroidota	c__Bacteroidia	o__Bacteroidales	f__Muribaculaceae	g__norank_f__Muribaculaceae	s__uncultured_bacterium_g__norank_f__Muribaculaceae	ASV3033	69	0	0	0	0	0	0	0	0	0	0	0	0	0	0	0	0	0	0	0	0	0	0	0
d__Bacteria	k__norank_d__Bacteria	p__Bacteroidota	c__Bacteroidia	o__Bacteroidales	f__Muribaculaceae	g__norank_f__Muribaculaceae	s__uncultured_bacterium_g__norank_f__Muribaculaceae	ASV3032	98	0	0	0	0	0	0	0	0	0	0	0	0	0	0	0	0	0	0	0	0	0	0	0
d__Bacteria	k__norank_d__Bacteria	p__Bacteroidota	c__Bacteroidia	o__Bacteroidales	f__Muribaculaceae	g__norank_f__Muribaculaceae	s__uncultured_bacterium_g__norank_f__Muribaculaceae	ASV3039	39	0	0	0	0	0	0	0	0	0	0	0	0	0	0	0	0	0	0	0	0	0	0	0
d__Bacteria	k__norank_d__Bacteria	p__Firmicutes	c__Clostridia	o__Clostridia_UCG-014	f__norank_o__Clostridia_UCG-014	g__norank_f__norank_o__Clostridia_UCG-014	s__uncultured_bacterium_g__norank_f__norank_o__Clostridia_UCG-014	ASV2451	0	0	0	0	0	0	0	0	0	0	20	11	0	0	0	0	0	0	0	0	0	0	0	0
d__Bacteria	k__norank_d__Bacteria	p__Firmicutes	c__Clostridia	o__Lachnospirales	f__Lachnospiraceae	g__unclassified_f__Lachnospiraceae	s__unclassified_f__Lachnospiraceae	ASV2302	0	0	22	0	0	0	0	0	0	0	0	0	36	0	0	0	0	0	0	0	0	0	0	0
d__Bacteria	k__norank_d__Bacteria	p__Bacteroidota	c__Bacteroidia	o__Bacteroidales	f__Muribaculaceae	g__norank_f__Muribaculaceae	s__uncultured_bacterium_g__norank_f__Muribaculaceae	ASV718	23	22	46	21	16	23	34	12	47	68	30	0	17	32	67	11	25	27	17	35	33	52	54	24
d__Bacteria	k__norank_d__Bacteria	p__Bacteroidota	c__Bacteroidia	o__Bacteroidales	f__Muribaculaceae	g__norank_f__Muribaculaceae	s__uncultured_bacterium_g__norank_f__Muribaculaceae	ASV719	26	23	37	37	36	31	62	31	77	17	25	33	21	10	38	18	45	25	61	33	23	22	56	23
d__Bacteria	k__norank_d__Bacteria	p__Firmicutes	c__Clostridia	o__Lachnospirales	f__Lachnospiraceae	g__unclassified_f__Lachnospiraceae	s__unclassified_f__Lachnospiraceae	ASV2306	0	0	18	0	0	0	0	45	0	0	0	0	0	0	0	0	0	0	0	0	0	0	0	0
d__Bacteria	k__norank_d__Bacteria	p__Firmicutes	c__Clostridia	o__Lachnospirales	f__Lachnospiraceae	g__unclassified_f__Lachnospiraceae	s__unclassified_f__Lachnospiraceae	ASV2304	0	0	17	0	0	0	0	0	0	0	0	0	9	0	0	0	0	0	0	0	0	0	0	0
d__Bacteria	k__norank_d__Bacteria	p__Bacteroidota	c__Bacteroidia	o__Bacteroidales	f__Muribaculaceae	g__norank_f__Muribaculaceae	s__uncultured_bacterium_g__norank_f__Muribaculaceae	ASV710	0	0	0	34	36	0	0	0	15	41	0	0	0	0	0	0	21	98	0	0	60	0	0	23
d__Bacteria	k__norank_d__Bacteria	p__Bacteroidota	c__Bacteroidia	o__Bacteroidales	f__Muribaculaceae	g__norank_f__Muribaculaceae	s__uncultured_bacterium_g__norank_f__Muribaculaceae	ASV716	24	0	1	5	0	0	0	9	20	0	11	0	0	12	0	19	0	0	0	10	6	0	0	25
d__Bacteria	k__norank_d__Bacteria	p__Firmicutes	c__Clostridia	o__Oscillospirales	f__Oscillospiraceae	g__unclassified_f__Oscillospiraceae	s__unclassified_f__Oscillospiraceae	ASV1322	0	0	0	5	0	5	0	0	0	0	0	7	0	0	0	0	0	0	0	0	0	0	0	0
d__Bacteria	k__norank_d__Bacteria	p__Bacteroidota	c__Bacteroidia	o__Bacteroidales	f__Muribaculaceae	g__norank_f__Muribaculaceae	s__unclassified_g__norank_f__Muribaculaceae	ASV773	0	0	0	0	0	0	0	0	0	0	0	0	0	0	0	0	0	0	0	0	0	0	0	16
d__Bacteria	k__norank_d__Bacteria	p__Firmicutes	c__Bacilli	o__Erysipelotrichales	f__Erysipelotrichaceae	g__norank_f__Erysipelotrichaceae	s__uncultured_bacterium_g__norank_f__Erysipelotrichaceae	ASV2502	0	0	0	0	0	0	0	0	0	0	2	0	0	0	0	0	0	0	0	0	0	0	0	0
d__Bacteria	k__norank_d__Bacteria	p__Firmicutes	c__Clostridia	o__Oscillospirales	f__Butyricicoccaceae	g__Butyricicoccus	s__uncultured_bacterium_g__Butyricicoccus	ASV1216	0	0	0	0	7	0	16	0	0	0	0	0	24	0	9	0	0	0	0	0	0	0	0	0
d__Bacteria	k__norank_d__Bacteria	p__Firmicutes	c__Clostridia	o__Lachnospirales	f__Lachnospiraceae	g__unclassified_f__Lachnospiraceae	s__unclassified_f__Lachnospiraceae	ASV1685	0	0	11	8	0	0	0	0	0	0	0	0	0	0	13	0	0	0	0	0	0	0	0	0
d__Bacteria	k__norank_d__Bacteria	p__Firmicutes	c__Clostridia	o__Lachnospirales	f__Lachnospiraceae	g__Lachnospiraceae_NK4A136_group	s__unclassified_g__Lachnospiraceae_NK4A136_group	ASV2361	0	0	0	0	0	0	0	0	98	0	0	0	0	0	0	0	0	0	0	0	0	0	0	0
d__Bacteria	k__norank_d__Bacteria	p__Firmicutes	c__Clostridia	o__Oscillospirales	f__Ruminococcaceae	g__unclassified_f__Ruminococcaceae	s__unclassified_f__Ruminococcaceae	ASV2512	0	0	0	0	0	0	0	0	0	0	2	0	0	0	0	0	0	0	0	0	0	0	0	0
d__Bacteria	k__norank_d__Bacteria	p__Firmicutes	c__Clostridia	o__Clostridia_UCG-014	f__norank_o__Clostridia_UCG-014	g__norank_f__norank_o__Clostridia_UCG-014	s__unclassified_g__norank_f__norank_o__Clostridia_UCG-014	ASV1864	0	0	0	0	0	0	0	0	0	0	0	20	0	0	0	7	0	0	0	0	0	17	0	0
d__Bacteria	k__norank_d__Bacteria	p__Firmicutes	c__Clostridia	o__Clostridia_UCG-014	f__norank_o__Clostridia_UCG-014	g__norank_f__norank_o__Clostridia_UCG-014	s__unclassified_g__norank_f__norank_o__Clostridia_UCG-014	ASV169	0	0	14	0	0	0	0	0	0	0	11	0	9	0	0	0	0	0	0	0	12	0	0	0
d__Bacteria	k__norank_d__Bacteria	p__Firmicutes	c__Clostridia	o__Lachnospirales	f__Lachnospiraceae	g__Lachnospiraceae_NK4A136_group	s__Lachnospiraceae_bacterium_COE1	ASV1556	0	0	0	0	0	0	0	12	0	0	0	0	0	0	0	0	0	0	12	7	0	0	0	0
d__Bacteria	k__norank_d__Bacteria	p__Firmicutes	c__Clostridia	o__Clostridia_UCG-014	f__norank_o__Clostridia_UCG-014	g__norank_f__norank_o__Clostridia_UCG-014	s__uncultured_bacterium_g__norank_f__norank_o__Clostridia_UCG-014	ASV2674	0	0	0	0	0	0	0	0	0	0	0	0	0	0	0	0	0	0	0	0	14	0	0	0
d__Bacteria	k__norank_d__Bacteria	p__Firmicutes	c__Clostridia	o__Lachnospirales	f__Lachnospiraceae	g__Lachnospiraceae_UCG-001	s__uncultured_bacterium_g__Lachnospiraceae_UCG-001	ASV2545	0	0	0	0	0	4	0	0	0	0	0	0	0	0	0	0	0	0	0	0	0	0	0	0
d__Bacteria	k__norank_d__Bacteria	p__Firmicutes	c__Clostridia	o__Oscillospirales	f__Ruminococcaceae	g__norank_f__Ruminococcaceae	s__uncultured_bacterium_g__norank_f__Ruminococcaceae	ASV1879	0	0	0	0	0	0	0	0	0	0	0	0	0	0	0	0	0	0	0	0	0	8	0	0
d__Bacteria	k__norank_d__Bacteria	p__Firmicutes	c__Clostridia	o__Peptostreptococcales-Tissierellales	f__Anaerovoracaceae	g__Eubacterium_brachy_group	s__uncultured_bacterium_g__Eubacterium_brachy_group	ASV1861	15	0	0	0	0	17	0	27	0	4	0	0	0	0	4	22	0	0	0	0	0	17	14	0
d__Bacteria	k__norank_d__Bacteria	p__Firmicutes	c__Bacilli	o__RF39	f__norank_o__RF39	g__norank_f__norank_o__RF39	s__uncultured_bacterium_g__norank_f__norank_o__RF39	ASV2230	0	0	0	0	0	2	0	0	0	0	0	0	0	0	0	0	0	23	0	6	0	0	0	0
d__Bacteria	k__norank_d__Bacteria	p__Firmicutes	c__Clostridia	o__Lachnospirales	f__Lachnospiraceae	g__unclassified_f__Lachnospiraceae	s__unclassified_f__Lachnospiraceae	ASV1208	0	0	0	0	8	0	0	26	27	0	0	0	0	0	0	0	0	0	0	0	0	0	0	0
d__Bacteria	k__norank_d__Bacteria	p__Firmicutes	c__Bacilli	o__Erysipelotrichales	f__Erysipelotrichaceae	g__Faecalibaculum	s__uncultured_bacterium_g__Faecalibaculum	ASV527	0	0	0	0	0	0	0	0	0	0	0	0	0	0	0	0	0	0	0	0	0	0	20	0
d__Bacteria	k__norank_d__Bacteria	p__Firmicutes	c__Clostridia	o__Lachnospirales	f__Lachnospiraceae	g__unclassified_f__Lachnospiraceae	s__unclassified_f__Lachnospiraceae	ASV1203	0	36	0	0	6	17	23	30	0	0	10	0	0	0	0	24	27	21	9	6	0	14	10	0
d__Bacteria	k__norank_d__Bacteria	p__Firmicutes	c__Clostridia	o__Lachnospirales	f__Lachnospiraceae	g__unclassified_f__Lachnospiraceae	s__unclassified_f__Lachnospiraceae	ASV1207	0	0	0	0	11	0	0	0	0	0	0	0	0	0	0	0	0	0	0	0	0	0	0	0
d__Bacteria	k__norank_d__Bacteria	p__Firmicutes	c__Clostridia	o__Lachnospirales	f__Lachnospiraceae	g__unclassified_f__Lachnospiraceae	s__unclassified_f__Lachnospiraceae	ASV1206	0	42	0	0	11	0	0	47	0	21	0	0	23	0	0	0	0	0	0	10	0	0	0	0
d__Bacteria	k__norank_d__Bacteria	p__Bacteroidota	c__Bacteroidia	o__Bacteroidales	f__Muribaculaceae	g__norank_f__Muribaculaceae	s__uncultured_bacterium_g__norank_f__Muribaculaceae	ASV909	0	0	0	0	0	0	0	0	0	0	0	0	0	0	0	0	0	0	0	0	0	0	0	2
d__Bacteria	k__norank_d__Bacteria	p__Firmicutes	c__unclassified_p__Firmicutes	o__unclassified_p__Firmicutes	f__unclassified_p__Firmicutes	g__unclassified_p__Firmicutes	s__unclassified_p__Firmicutes	ASV1904	0	0	0	0	0	0	0	0	0	0	0	0	0	0	0	0	0	0	0	0	0	4	0	0
d__Bacteria	k__norank_d__Bacteria	p__Firmicutes	c__Clostridia	o__Oscillospirales	f__Oscillospiraceae	g__NK4A214_group	s__unclassified_g__NK4A214_group	ASV590	4	0	0	19	0	7	7	0	5	3	0	5	0	0	0	6	6	0	0	0	4	3	4	0
d__Bacteria	k__norank_d__Bacteria	p__Bacteroidota	c__Bacteroidia	o__Bacteroidales	f__Muribaculaceae	g__norank_f__Muribaculaceae	s__uncultured_bacterium_g__norank_f__Muribaculaceae	ASV1967	0	81	0	15	0	0	0	0	0	0	0	77	36	0	0	0	0	0	0	0	50	0	0	0
d__Bacteria	k__norank_d__Bacteria	p__Firmicutes	c__Clostridia	o__Lachnospirales	f__Lachnospiraceae	g__unclassified_f__Lachnospiraceae	s__unclassified_f__Lachnospiraceae	ASV2866	0	0	0	0	0	0	0	0	0	0	0	0	0	0	0	0	0	11	0	0	0	0	0	0
d__Bacteria	k__norank_d__Bacteria	p__Bacteroidota	c__Bacteroidia	o__Bacteroidales	f__Muribaculaceae	g__norank_f__Muribaculaceae	s__uncultured_bacterium_g__norank_f__Muribaculaceae	ASV269	0	0	0	0	0	0	0	0	0	0	0	14	0	0	0	0	0	0	0	0	0	0	0	0
d__Bacteria	k__norank_d__Bacteria	p__Firmicutes	c__Clostridia	o__Peptostreptococcales-Tissierellales	f__Anaerovoracaceae	g__Eubacterium_brachy_group	s__uncultured_bacterium_g__Eubacterium_brachy_group	ASV717	0	17	0	0	0	0	20	0	0	0	0	0	20	0	0	0	21	0	0	15	0	0	0	27
d__Bacteria	k__norank_d__Bacteria	p__Firmicutes	c__Clostridia	o__Monoglobales	f__Monoglobaceae	g__Monoglobus	s__unclassified_g__Monoglobus	ASV2310	0	0	20	0	0	0	22	0	0	0	0	0	0	0	5	0	0	0	0	0	0	0	0	0
d__Bacteria	k__norank_d__Bacteria	p__Firmicutes	c__Clostridia	o__Lachnospirales	f__Lachnospiraceae	g__unclassified_f__Lachnospiraceae	s__unclassified_f__Lachnospiraceae	ASV123	0	0	0	0	0	0	0	0	0	0	0	0	0	0	0	0	0	7	0	0	0	0	0	0
d__Bacteria	k__norank_d__Bacteria	p__Bacteroidota	c__Bacteroidia	o__Bacteroidales	f__Muribaculaceae	g__norank_f__Muribaculaceae	s__uncultured_bacterium_g__norank_f__Muribaculaceae	ASV1141	0	0	0	0	57	0	44	0	0	0	0	0	0	91	0	0	31	0	0	0	0	0	0	0
d__Bacteria	k__norank_d__Bacteria	p__Bacteroidota	c__Bacteroidia	o__Bacteroidales	f__Muribaculaceae	g__norank_f__Muribaculaceae	s__uncultured_bacterium_g__norank_f__Muribaculaceae	ASV1143	0	17	0	24	58	34	45	20	9	0	52	7	0	0	23	0	27	0	0	22	0	8	0	0
d__Bacteria	k__norank_d__Bacteria	p__Bacteroidota	c__Bacteroidia	o__Bacteroidales	f__Muribaculaceae	g__norank_f__Muribaculaceae	s__uncultured_bacterium_g__norank_f__Muribaculaceae	ASV1147	0	0	94	0	56	34	51	0	0	0	0	0	0	0	0	0	0	0	0	34	0	24	0	0
d__Bacteria	k__norank_d__Bacteria	p__Bacteroidota	c__Bacteroidia	o__Bacteroidales	f__Muribaculaceae	g__norank_f__Muribaculaceae	s__uncultured_bacterium_g__norank_f__Muribaculaceae	ASV1146	0	0	36	0	56	0	47	0	0	0	140	0	36	0	91	0	27	128	20	0	0	0	35	0
d__Bacteria	k__norank_d__Bacteria	p__Bacteroidota	c__Bacteroidia	o__Bacteroidales	f__Muribaculaceae	g__norank_f__Muribaculaceae	s__uncultured_bacterium_g__norank_f__Muribaculaceae	ASV666	17	61	120	53	83	68	30	36	23	50	22	0	18	14	30	35	15	76	29	74	100	44	16	36
d__Bacteria	k__norank_d__Bacteria	p__Bacteroidota	c__Bacteroidia	o__Bacteroidales	f__Muribaculaceae	g__norank_f__Muribaculaceae	s__uncultured_bacterium_g__norank_f__Muribaculaceae	ASV667	66	27	0	42	28	42	36	15	6	64	7	0	78	108	44	11	34	8	0	62	17	47	27	37
d__Bacteria	k__norank_d__Bacteria	p__Bacteroidota	c__Bacteroidia	o__Bacteroidales	f__Muribaculaceae	g__norank_f__Muribaculaceae	s__uncultured_bacterium_g__norank_f__Muribaculaceae	ASV665	0	56	22	0	0	0	0	41	0	110	0	0	0	19	0	0	0	40	0	0	33	36	0	37
d__Bacteria	k__norank_d__Bacteria	p__Firmicutes	c__Clostridia	o__Lachnospirales	f__Lachnospiraceae	g__unclassified_f__Lachnospiraceae	s__unclassified_f__Lachnospiraceae	ASV2273	0	0	0	0	0	0	0	0	0	0	0	0	0	4	0	0	0	0	0	0	0	0	0	0
d__Bacteria	k__norank_d__Bacteria	p__Firmicutes	c__Bacilli	o__Lactobacillales	f__Lactobacillaceae	g__Lactobacillus	s__unclassified_g__Lactobacillus	ASV1255	0	0	19	41	0	0	0	0	0	0	0	0	0	0	0	0	0	0	0	37	0	0	71	0
d__Bacteria	k__norank_d__Bacteria	p__Firmicutes	c__Clostridia	o__Lachnospirales	f__Lachnospiraceae	g__unclassified_f__Lachnospiraceae	s__unclassified_f__Lachnospiraceae	ASV831	0	0	0	0	0	0	0	31	0	0	0	15	0	0	0	4	0	0	0	0	0	0	0	12
d__Bacteria	k__norank_d__Bacteria	p__Firmicutes	c__Clostridia	o__Lachnospirales	f__Lachnospiraceae	g__unclassified_f__Lachnospiraceae	s__unclassified_f__Lachnospiraceae	ASV833	63	161	0	0	0	0	0	0	0	14	0	0	0	22	0	0	0	110	0	0	0	0	0	9
d__Bacteria	k__norank_d__Bacteria	p__Firmicutes	c__Clostridia	o__Lachnospirales	f__Lachnospiraceae	g__unclassified_f__Lachnospiraceae	s__unclassified_f__Lachnospiraceae	ASV834	0	0	12	4	0	0	0	0	0	0	0	0	0	0	0	0	0	0	0	0	11	0	0	11
d__Bacteria	k__norank_d__Bacteria	p__Firmicutes	c__Bacilli	o__Lactobacillales	f__Lactobacillaceae	g__Lactobacillus	s__unclassified_g__Lactobacillus	ASV1250	0	0	12	37	0	0	0	0	0	0	0	0	0	0	0	0	0	0	0	54	0	0	70	0
d__Bacteria	k__norank_d__Bacteria	p__Firmicutes	c__Clostridia	o__Oscillospirales	f__Ruminococcaceae	g__Eubacterium_siraeum_group	s__uncultured_bacterium_g__Eubacterium_siraeum_group	ASV1214	0	0	0	0	7	0	0	0	0	0	0	0	0	0	0	0	0	0	0	0	0	0	0	0
d__Bacteria	k__norank_d__Bacteria	p__Firmicutes	c__Clostridia	o__Lachnospirales	f__Lachnospiraceae	g__unclassified_f__Lachnospiraceae	s__unclassified_f__Lachnospiraceae	ASV3079	0	0	0	0	0	0	19	0	0	0	0	0	0	0	0	0	0	0	0	0	0	0	0	0
d__Bacteria	k__norank_d__Bacteria	p__Bacteroidota	c__Bacteroidia	o__Bacteroidales	f__Muribaculaceae	g__norank_f__Muribaculaceae	s__uncultured_bacterium_g__norank_f__Muribaculaceae	ASV1540	60	0	0	0	0	0	0	0	0	0	0	0	0	54	17	0	0	0	16	0	0	0	11	0
d__Bacteria	k__norank_d__Bacteria	p__Firmicutes	c__Clostridia	o__Clostridia_UCG-014	f__norank_o__Clostridia_UCG-014	g__norank_f__norank_o__Clostridia_UCG-014	s__uncultured_bacterium_g__norank_f__norank_o__Clostridia_UCG-014	ASV1217	0	0	0	0	6	0	0	0	0	0	0	0	0	0	0	0	0	0	0	0	0	0	0	0
d__Bacteria	k__norank_d__Bacteria	p__Firmicutes	c__Clostridia	o__Oscillospirales	f__Butyricicoccaceae	g__Butyricicoccus	s__uncultured_bacterium_g__Butyricicoccus	ASV2928	0	0	0	0	0	0	0	0	0	0	0	0	2	0	0	0	0	0	0	0	0	0	0	0
d__Bacteria	k__norank_d__Bacteria	p__Firmicutes	c__Clostridia	o__Lachnospirales	f__Lachnospiraceae	g__unclassified_f__Lachnospiraceae	s__unclassified_f__Lachnospiraceae	ASV2063	0	0	0	0	0	0	0	0	0	24	0	0	9	0	0	0	0	0	0	0	0	0	0	0
d__Bacteria	k__norank_d__Bacteria	p__Firmicutes	c__Clostridia	o__Lachnospirales	f__Lachnospiraceae	g__unclassified_f__Lachnospiraceae	s__unclassified_f__Lachnospiraceae	ASV2079	0	0	0	0	0	0	0	0	0	13	0	0	0	0	0	0	0	0	0	0	0	0	0	0
d__Bacteria	k__norank_d__Bacteria	p__Firmicutes	c__Bacilli	o__RF39	f__norank_o__RF39	g__norank_f__norank_o__RF39	s__uncultured_bacterium_g__norank_f__norank_o__RF39	ASV1225	8	0	17	9	4	0	0	0	0	0	0	11	7	0	18	14	4	0	0	0	4	0	15	0
d__Bacteria	k__norank_d__Bacteria	p__Firmicutes	c__Bacilli	o__Lactobacillales	f__Lactobacillaceae	g__Lactobacillus	s__unclassified_g__Lactobacillus	ASV2855	0	0	0	0	0	0	0	0	0	0	0	0	0	0	0	0	0	28	0	0	0	0	0	0
d__Bacteria	k__norank_d__Bacteria	p__Firmicutes	c__Clostridia	o__Lachnospirales	f__Lachnospiraceae	g__unclassified_f__Lachnospiraceae	s__unclassified_f__Lachnospiraceae	ASV2413	0	0	0	0	0	0	0	0	4	0	0	0	0	0	0	0	0	0	0	0	0	0	0	0
d__Bacteria	k__norank_d__Bacteria	p__Firmicutes	c__Clostridia	o__Lachnospirales	f__Lachnospiraceae	g__Lachnospiraceae_NK4A136_group	s__Lachnospiraceae_bacterium_COE1	ASV689	0	29	58	12	0	0	0	41	35	30	0	0	0	7	0	18	4	35	0	0	0	0	0	29
d__Bacteria	k__norank_d__Bacteria	p__Bacteroidota	c__Bacteroidia	o__Bacteroidales	f__Muribaculaceae	g__norank_f__Muribaculaceae	s__uncultured_bacterium_g__norank_f__Muribaculaceae	ASV1575	0	0	0	0	0	0	0	7	0	0	0	0	0	0	0	0	0	0	8	0	0	0	0	0
d__Bacteria	k__norank_d__Bacteria	p__Firmicutes	c__Clostridia	o__Oscillospirales	f__Oscillospiraceae	g__unclassified_f__Oscillospiraceae	s__unclassified_f__Oscillospiraceae	ASV2098	0	0	0	0	0	0	0	0	0	6	0	0	0	0	0	0	0	0	0	0	0	0	0	0
d__Bacteria	k__norank_d__Bacteria	p__Firmicutes	c__Clostridia	o__Oscillospirales	f__Oscillospiraceae	g__norank_f__Oscillospiraceae	s__uncultured_bacterium_g__norank_f__Oscillospiraceae	ASV732	0	0	0	16	0	9	0	0	0	0	0	0	0	0	0	0	23	0	13	0	0	0	0	23
d__Bacteria	k__norank_d__Bacteria	p__Firmicutes	c__Clostridia	o__Oscillospirales	f__Oscillospiraceae	g__unclassified_f__Oscillospiraceae	s__unclassified_f__Oscillospiraceae	ASV2091	0	0	0	0	0	0	0	0	0	9	0	0	0	0	0	0	14	0	0	0	0	0	0	0
d__Bacteria	k__norank_d__Bacteria	p__Bacteroidota	c__Bacteroidia	o__Bacteroidales	f__Muribaculaceae	g__norank_f__Muribaculaceae	s__unclassified_g__norank_f__Muribaculaceae	ASV1158	0	0	0	0	36	33	0	0	0	14	44	0	0	0	0	0	0	0	0	0	0	28	0	0
d__Bacteria	k__norank_d__Bacteria	p__Bacteroidota	c__Bacteroidia	o__Bacteroidales	f__Marinifilaceae	g__Odoribacter	s__uncultured_bacterium_g__Odoribacter	ASV2341	0	0	5	0	0	0	0	0	0	0	0	0	0	0	0	0	0	0	0	0	0	0	0	0
d__Bacteria	k__norank_d__Bacteria	p__Firmicutes	c__Clostridia	o__Lachnospirales	f__Lachnospiraceae	g__Lachnospiraceae_UCG-001	s__uncultured_bacterium_g__Lachnospiraceae_UCG-001	ASV589	0	0	0	0	0	0	0	54	0	0	0	0	0	0	0	0	0	0	0	0	0	0	0	32
d__Bacteria	k__norank_d__Bacteria	p__Firmicutes	c__Clostridia	o__Lachnospirales	f__Lachnospiraceae	g__GCA-900066575	s__uncultured_bacterium_g__GCA-900066575	ASV2789	0	0	0	0	0	0	0	2	0	0	0	0	0	0	0	0	0	16	0	0	0	0	0	0
d__Bacteria	k__norank_d__Bacteria	p__Actinobacteriota	c__Coriobacteriia	o__Coriobacteriales	f__Eggerthellaceae	g__Enterorhabdus	s__uncultured_bacterium_g__Enterorhabdus	ASV2032	0	0	0	1	0	0	0	0	0	0	0	0	0	0	0	5	0	0	0	0	0	0	0	0
d__Bacteria	k__norank_d__Bacteria	p__Firmicutes	c__Clostridia	o__Clostridia_UCG-014	f__norank_o__Clostridia_UCG-014	g__norank_f__norank_o__Clostridia_UCG-014	s__uncultured_bacterium_g__norank_f__norank_o__Clostridia_UCG-014	ASV1905	0	0	0	0	0	0	0	0	0	0	0	0	0	0	0	0	0	0	0	0	0	3	0	0
d__Bacteria	k__norank_d__Bacteria	p__Actinobacteriota	c__Coriobacteriia	o__Coriobacteriales	f__Eggerthellaceae	g__Enterorhabdus	s__uncultured_bacterium_g__Enterorhabdus	ASV2034	0	0	0	1	0	0	0	3	0	0	0	3	2	2	0	0	0	0	0	0	0	0	0	0
d__Bacteria	k__norank_d__Bacteria	p__Firmicutes	c__Clostridia	o__Oscillospirales	f__Oscillospiraceae	g__norank_f__Oscillospiraceae	s__unclassified_g__norank_f__Oscillospiraceae	ASV538	0	0	0	0	0	0	25	0	0	0	0	0	0	0	0	0	0	0	0	0	0	0	0	0
d__Bacteria	k__norank_d__Bacteria	p__Bacteroidota	c__Bacteroidia	o__Bacteroidales	f__Muribaculaceae	g__norank_f__Muribaculaceae	s__mouse_gut_metagenome_g__norank_f__Muribaculaceae	ASV668	34	48	45	35	21	43	23	33	40	72	26	30	24	31	36	28	31	40	47	28	32	37	43	42
d__Bacteria	k__norank_d__Bacteria	p__Firmicutes	c__Clostridia	o__Lachnospirales	f__Lachnospiraceae	g__unclassified_f__Lachnospiraceae	s__unclassified_f__Lachnospiraceae	ASV2968	0	0	0	0	0	0	0	0	0	0	0	0	0	0	0	0	49	0	0	0	0	0	0	0
d__Bacteria	k__norank_d__Bacteria	p__Firmicutes	c__Clostridia	o__Christensenellales	f__Christensenellaceae	g__Christensenellaceae_R-7_group	s__unclassified_g__Christensenellaceae_R-7_group	ASV2456	0	0	0	0	0	0	0	0	0	0	18	0	0	0	0	0	0	0	0	0	0	0	0	0
d__Bacteria	k__norank_d__Bacteria	p__Firmicutes	c__Bacilli	o__RF39	f__norank_o__RF39	g__norank_f__norank_o__RF39	s__uncultured_Lachnospiraceae_bacterium_g__norank_f__norank	ASV901	0	0	9	0	0	8	0	0	0	0	0	0	0	0	11	0	0	0	0	0	0	2	0	3
d__Bacteria	k__norank_d__Bacteria	p__Firmicutes	c__Clostridia	o__Clostridia_UCG-014	f__norank_o__Clostridia_UCG-014	g__norank_f__norank_o__Clostridia_UCG-014	s__unclassified_g__norank_f__norank_o__Clostridia_UCG-014	ASV1470	0	0	23	14	0	0	0	0	0	0	22	27	0	14	0	24	0	0	48	0	0	97	4	0
d__Bacteria	k__norank_d__Bacteria	p__Bacteroidota	c__Bacteroidia	o__Bacteroidales	f__Muribaculaceae	g__norank_f__Muribaculaceae	s__uncultured_organism_g__norank_f__Muribaculaceae	ASV886	5	7	18	14	7	6	5	11	0	9	198	10	5	21	5	15	9	24	12	0	15	11	69	3
d__Bacteria	k__norank_d__Bacteria	p__Firmicutes	c__Clostridia	o__Lachnospirales	f__Lachnospiraceae	g__unclassified_f__Lachnospiraceae	s__unclassified_f__Lachnospiraceae	ASV2930	0	0	0	0	0	0	0	0	0	0	0	0	3	0	0	0	0	0	0	0	0	0	0	0
d__Bacteria	k__norank_d__Bacteria	p__Bacteroidota	c__Bacteroidia	o__Bacteroidales	f__Muribaculaceae	g__norank_f__Muribaculaceae	s__unclassified_g__norank_f__Muribaculaceae	ASV1731	0	0	0	0	0	0	0	0	0	62	0	0	0	0	0	34	0	0	0	0	0	0	33	0
d__Bacteria	k__norank_d__Bacteria	p__Bacteroidota	c__Bacteroidia	o__Bacteroidales	f__Prevotellaceae	g__Prevotellaceae_UCG-001	s__unclassified_g__Prevotellaceae_UCG-001	ASV571	0	0	0	0	0	0	0	0	0	0	0	13	0	46	0	0	0	0	0	0	0	0	0	0
d__Bacteria	k__norank_d__Bacteria	p__Bacteroidota	c__Bacteroidia	o__Bacteroidales	f__Muribaculaceae	g__norank_f__Muribaculaceae	s__uncultured_bacterium_g__norank_f__Muribaculaceae	ASV1204	0	0	0	0	9	160	11	0	0	0	0	0	11	0	60	0	0	0	0	0	0	10	0	0
d__Bacteria	k__norank_d__Bacteria	p__Bacteroidota	c__Bacteroidia	o__Bacteroidales	f__Muribaculaceae	g__norank_f__Muribaculaceae	s__uncultured_bacterium_g__norank_f__Muribaculaceae	ASV1200	0	0	0	0	12	14	0	0	6	0	8	0	0	0	0	0	0	25	0	0	0	0	14	0
d__Bacteria	k__norank_d__Bacteria	p__Bacteroidota	c__Bacteroidia	o__Bacteroidales	f__Muribaculaceae	g__norank_f__Muribaculaceae	s__uncultured_bacterium_g__norank_f__Muribaculaceae	ASV1201	0	0	0	0	13	10	17	0	0	0	0	0	0	10	0	0	0	0	15	0	0	13	8	0
d__Bacteria	k__norank_d__Bacteria	p__Firmicutes	c__Clostridia	o__Lachnospirales	f__Lachnospiraceae	g__GCA-900066575	s__uncultured_bacterium_g__GCA-900066575	ASV1947	0	0	15	20	0	0	0	12	14	6	0	0	0	0	0	0	16	23	0	0	0	0	10	0
d__Bacteria	k__norank_d__Bacteria	p__Bacteroidota	c__Bacteroidia	o__Bacteroidales	f__Muribaculaceae	g__norank_f__Muribaculaceae	s__uncultured_bacterium_g__norank_f__Muribaculaceae	ASV1209	0	0	0	0	8	0	0	0	0	0	0	0	0	0	0	0	0	0	0	0	0	0	0	0
d__Bacteria	k__norank_d__Bacteria	p__Bacteroidota	c__Bacteroidia	o__Bacteroidales	f__Muribaculaceae	g__norank_f__Muribaculaceae	s__unclassified_g__norank_f__Muribaculaceae	ASV2822	0	0	0	0	0	0	0	0	0	0	0	0	0	0	48	0	0	0	0	0	0	0	0	0
d__Bacteria	k__norank_d__Bacteria	p__Bacteroidota	c__Bacteroidia	o__Bacteroidales	f__Muribaculaceae	g__norank_f__Muribaculaceae	s__unclassified_g__norank_f__Muribaculaceae	ASV2828	0	0	0	0	0	0	12	0	0	0	0	0	0	0	20	0	0	0	0	0	0	0	0	0
d__Bacteria	k__norank_d__Bacteria	p__Firmicutes	c__Clostridia	o__Oscillospirales	f__Ruminococcaceae	g__Ruminococcus	s__unclassified_g__Ruminococcus	ASV1421	0	0	0	0	0	0	0	0	0	0	0	0	67	0	0	0	0	0	0	0	0	0	0	0
d__Bacteria	k__norank_d__Bacteria	p__Desulfobacterota	c__Desulfovibrionia	o__Desulfovibrionales	f__Desulfovibrionaceae	g__Desulfovibrio	s__uncultured_bacterium_g__Desulfovibrio	ASV981	18	0	21	0	0	0	0	0	0	0	0	0	44	15	0	0	39	0	16	0	0	0	32	0
d__Bacteria	k__norank_d__Bacteria	p__Actinobacteriota	c__Actinobacteria	o__Bifidobacteriales	f__Bifidobacteriaceae	g__Bifidobacterium	s__unclassified_g__Bifidobacterium	ASV47	69	0	36	0	0	0	0	0	0	0	75	60	0	23	0	142	0	9	7	29	0	0	96	0
d__Bacteria	k__norank_d__Bacteria	p__Firmicutes	c__Bacilli	o__Lactobacillales	f__Lactobacillaceae	g__Lactobacillus	s__unclassified_g__Lactobacillus	ASV2078	0	0	0	0	0	0	0	0	0	17	0	0	0	0	0	0	0	0	0	0	0	0	0	0
d__Bacteria	k__norank_d__Bacteria	p__Bacteroidota	c__Bacteroidia	o__Bacteroidales	f__Muribaculaceae	g__norank_f__Muribaculaceae	s__unclassified_g__norank_f__Muribaculaceae	ASV2176	0	72	32	0	0	0	0	0	0	0	0	0	29	0	0	0	0	35	0	81	0	0	0	0
d__Bacteria	k__norank_d__Bacteria	p__Firmicutes	c__Clostridia	o__Oscillospirales	f__Oscillospiraceae	g__Colidextribacter	s__unclassified_g__Colidextribacter	ASV2798	34	28	0	0	0	0	0	0	0	0	0	0	0	0	0	0	0	0	0	0	0	0	47	0
d__Bacteria	k__norank_d__Bacteria	p__Firmicutes	c__Bacilli	o__Mycoplasmatales	f__Mycoplasmataceae	g__Mycoplasma	s__unclassified_g__Mycoplasma	ASV1993	0	0	6	7	0	0	0	0	0	0	4	0	0	0	0	7	0	2	0	0	3	0	5	0
d__Bacteria	k__norank_d__Bacteria	p__Firmicutes	c__Clostridia	o__Clostridia_UCG-014	f__norank_o__Clostridia_UCG-014	g__norank_f__norank_o__Clostridia_UCG-014	s__unclassified_g__norank_f__norank_o__Clostridia_UCG-014	ASV506	0	0	0	0	0	0	0	0	0	0	12	0	0	0	0	0	0	0	0	0	0	0	0	0
d__Bacteria	k__norank_d__Bacteria	p__Desulfobacterota	c__Desulfovibrionia	o__Desulfovibrionales	f__Desulfovibrionaceae	g__Desulfovibrio	s__uncultured_bacterium_g__Desulfovibrio	ASV2270	0	0	0	0	0	0	0	0	0	0	0	0	0	5	0	0	0	0	0	0	0	0	0	0
d__Bacteria	k__norank_d__Bacteria	p__Bacteroidota	c__Bacteroidia	o__Bacteroidales	f__Muribaculaceae	g__norank_f__Muribaculaceae	s__unclassified_g__norank_f__Muribaculaceae	ASV552	0	15	0	0	0	0	16	0	0	21	0	0	0	0	0	11	17	27	33	0	25	0	36	0
d__Bacteria	k__norank_d__Bacteria	p__Bacteroidota	c__Bacteroidia	o__Bacteroidales	f__Muribaculaceae	g__norank_f__Muribaculaceae	s__uncultured_bacterium_g__norank_f__Muribaculaceae	ASV879	0	9	0	0	0	0	0	0	0	0	0	0	0	0	38	0	0	0	0	0	0	0	0	7
d__Bacteria	k__norank_d__Bacteria	p__Bacteroidota	c__Bacteroidia	o__Bacteroidales	f__Muribaculaceae	g__norank_f__Muribaculaceae	s__uncultured_bacterium_g__norank_f__Muribaculaceae	ASV878	4	8	8	6	0	0	9	0	6	5	0	3	0	0	11	0	10	13	8	0	0	0	11	4
d__Bacteria	k__norank_d__Bacteria	p__Firmicutes	c__Clostridia	o__Oscillospirales	f__Ruminococcaceae	g__unclassified_f__Ruminococcaceae	s__unclassified_f__Ruminococcaceae	ASV738	0	0	0	0	0	0	0	37	15	0	18	0	0	0	0	5	0	18	0	0	0	0	0	21
d__Bacteria	k__norank_d__Bacteria	p__Bacteroidota	c__Bacteroidia	o__Bacteroidales	f__Muribaculaceae	g__norank_f__Muribaculaceae	s__unclassified_g__norank_f__Muribaculaceae	ASV839	0	8	0	0	0	0	0	14	0	9	0	0	0	0	0	0	0	0	0	0	0	0	0	10
d__Bacteria	k__norank_d__Bacteria	p__Firmicutes	c__Clostridia	o__Lachnospirales	f__Lachnospiraceae	g__GCA-900066575	s__uncultured_bacterium_g__GCA-900066575	ASV526	0	0	0	0	0	0	16	0	0	0	0	0	0	4	0	0	0	0	0	0	0	0	0	0
d__Bacteria	k__norank_d__Bacteria	p__Bacteroidota	c__Bacteroidia	o__Bacteroidales	f__Muribaculaceae	g__norank_f__Muribaculaceae	s__uncultured_bacterium_g__norank_f__Muribaculaceae	ASV1551	15	6	39	19	0	0	0	3	0	45	27	61	12	0	31	66	10	71	12	39	22	0	8	0
d__Bacteria	k__norank_d__Bacteria	p__Firmicutes	c__Clostridia	o__Clostridia_vadinBB60_group	f__norank_o__Clostridia_vadinBB60_group	g__norank_f__norank_o__Clostridia_vadinBB60_group	s__uncultured_bacterium_g__norank_f__norank_o__Clostridia_vadinBB60_group	ASV2696	0	0	0	0	0	0	0	0	0	0	0	0	0	0	0	0	0	0	0	0	2	0	0	0
d__Bacteria	k__norank_d__Bacteria	p__Firmicutes	c__Clostridia	o__Clostridia_vadinBB60_group	f__norank_o__Clostridia_vadinBB60_group	g__norank_f__norank_o__Clostridia_vadinBB60_group	s__uncultured_bacterium_g__norank_f__norank_o__Clostridia_vadinBB60_group	ASV2695	0	0	0	0	0	0	0	0	0	0	0	0	0	0	0	0	0	0	0	0	3	0	0	0
d__Bacteria	k__norank_d__Bacteria	p__Firmicutes	c__Clostridia	o__Clostridia_vadinBB60_group	f__norank_o__Clostridia_vadinBB60_group	g__norank_f__norank_o__Clostridia_vadinBB60_group	s__uncultured_bacterium_g__norank_f__norank_o__Clostridia_vadinBB60_group	ASV2694	0	0	0	0	0	0	0	0	0	0	0	0	0	0	0	0	0	0	0	0	3	0	0	0
d__Bacteria	k__norank_d__Bacteria	p__Firmicutes	c__Clostridia	o__Oscillospirales	f__Ruminococcaceae	g__Ruminococcus	s__Ruminococcus_flavefaciens	ASV1071	0	0	0	0	76	0	4	0	0	0	0	25	0	0	22	19	0	0	17	0	0	0	0	0
d__Bacteria	k__norank_d__Bacteria	p__Bacteroidota	c__Bacteroidia	o__Bacteroidales	f__Muribaculaceae	g__norank_f__Muribaculaceae	s__unclassified_g__norank_f__Muribaculaceae	ASV2287	0	0	35	0	0	0	0	0	0	0	0	0	0	0	0	0	0	0	0	0	0	0	0	0
d__Bacteria	k__norank_d__Bacteria	p__Firmicutes	c__Bacilli	o__Lactobacillales	f__Lactobacillaceae	g__Lactobacillus	s__unclassified_g__Lactobacillus	ASV1920	0	0	0	80	0	0	0	0	0	0	0	0	0	0	0	0	0	0	0	0	0	0	0	0
d__Bacteria	k__norank_d__Bacteria	p__Firmicutes	c__Clostridia	o__Lachnospirales	f__Lachnospiraceae	g__unclassified_f__Lachnospiraceae	s__unclassified_f__Lachnospiraceae	ASV1025	0	18	0	0	0	0	0	0	0	0	0	0	10	0	0	0	0	0	13	0	0	0	0	0
d__Bacteria	k__norank_d__Bacteria	p__Bacteroidota	c__Bacteroidia	o__Bacteroidales	f__Muribaculaceae	g__norank_f__Muribaculaceae	s__unclassified_g__norank_f__Muribaculaceae	ASV1559	0	0	144	0	0	13	0	0	35	0	20	0	0	36	0	3	0	14	11	0	16	0	28	0
d__Bacteria	k__norank_d__Bacteria	p__Firmicutes	c__Bacilli	o__Lactobacillales	f__Lactobacillaceae	g__Lactobacillus	s__unclassified_g__Lactobacillus	ASV1929	0	0	0	43	0	0	0	38	48	0	0	0	0	0	0	0	0	0	0	0	0	0	0	0
d__Bacteria	k__norank_d__Bacteria	p__Bacteroidota	c__Bacteroidia	o__Bacteroidales	f__Marinifilaceae	g__Odoribacter	s__unclassified_g__Odoribacter	ASV1860	0	0	5	0	0	5	0	0	0	0	0	0	0	0	0	0	10	0	0	0	0	17	0	0
d__Bacteria	k__norank_d__Bacteria	p__Firmicutes	c__Clostridia	o__Clostridia_UCG-014	f__norank_o__Clostridia_UCG-014	g__norank_f__norank_o__Clostridia_UCG-014	s__unclassified_g__norank_f__norank_o__Clostridia_UCG-014	ASV277	0	0	0	0	0	0	0	0	0	0	0	0	0	0	12	0	0	0	0	0	0	0	25	0
d__Bacteria	k__norank_d__Bacteria	p__Firmicutes	c__Clostridia	o__Lachnospirales	f__Lachnospiraceae	g__Lachnospiraceae_UCG-006	s__uncultured_bacterium_g__Lachnospiraceae_UCG-006	ASV715	0	0	9	0	0	0	0	14	0	0	0	0	90	0	0	0	0	0	12	0	0	0	0	25
d__Bacteria	k__norank_d__Bacteria	p__Bacteroidota	c__Bacteroidia	o__Bacteroidales	f__Muribaculaceae	g__norank_f__Muribaculaceae	s__uncultured_bacterium_g__norank_f__Muribaculaceae	ASV2008	11	0	0	7	0	0	0	0	0	0	0	0	0	0	0	0	0	16	0	32	0	0	0	0
d__Bacteria	k__norank_d__Bacteria	p__Firmicutes	c__Bacilli	o__Lactobacillales	f__Lactobacillaceae	g__Lactobacillus	s__unclassified_g__Lactobacillus	ASV1815	0	0	0	0	0	0	0	0	0	0	0	0	0	0	0	0	0	0	0	0	0	53	0	0
d__Bacteria	k__norank_d__Bacteria	p__Firmicutes	c__Clostridia	o__Lachnospirales	f__Lachnospiraceae	g__Lachnospiraceae_NK4A136_group	s__unclassified_g__Lachnospiraceae_NK4A136_group	ASV622	0	0	0	0	0	0	0	41	39	0	0	0	0	13	0	15	0	0	0	0	0	0	0	126
d__Bacteria	k__norank_d__Bacteria	p__Firmicutes	c__Clostridia	o__Lachnospirales	f__Lachnospiraceae	g__Lachnospiraceae_NK4A136_group	s__unclassified_g__Lachnospiraceae_NK4A136_group	ASV625	0	22	100	53	0	0	0	0	36	0	5	0	0	0	0	0	0	94	16	43	89	0	127	85
d__Bacteria	k__norank_d__Bacteria	p__Desulfobacterota	c__Desulfovibrionia	o__Desulfovibrionales	f__Desulfovibrionaceae	g__Desulfovibrio	s__unclassified_g__Desulfovibrio	ASV2482	0	0	0	0	0	0	0	0	0	0	7	0	0	0	0	0	0	0	0	0	0	0	0	0
d__Bacteria	k__norank_d__Bacteria	p__Firmicutes	c__Clostridia	o__Lachnospirales	f__Lachnospiraceae	g__unclassified_f__Lachnospiraceae	s__unclassified_f__Lachnospiraceae	ASV3068	2	0	0	0	0	0	0	0	0	0	0	0	0	0	0	0	0	0	0	0	0	0	0	0
d__Bacteria	k__norank_d__Bacteria	p__Desulfobacterota	c__Desulfovibrionia	o__Desulfovibrionales	f__Desulfovibrionaceae	g__Desulfovibrio	s__unclassified_g__Desulfovibrio	ASV435	0	0	0	0	0	0	7	0	0	0	0	0	3	0	0	0	20	0	0	0	0	0	0	0
d__Bacteria	k__norank_d__Bacteria	p__Firmicutes	c__Clostridia	o__Lachnospirales	f__Lachnospiraceae	g__norank_f__Lachnospiraceae	s__Ruminococcus_sp._ID1	ASV2183	0	0	0	0	0	0	0	0	0	0	0	0	0	0	0	0	0	0	0	55	0	0	0	0
d__Bacteria	k__norank_d__Bacteria	p__Bacteroidota	c__Bacteroidia	o__Bacteroidales	f__Muribaculaceae	g__norank_f__Muribaculaceae	s__unclassified_g__norank_f__Muribaculaceae	ASV1485	22	0	0	0	0	0	45	0	0	0	0	0	0	0	0	33	29	0	34	0	0	0	0	0
d__Bacteria	k__norank_d__Bacteria	p__Firmicutes	c__Clostridia	o__Oscillospirales	f__Ruminococcaceae	g__Ruminococcus	s__unclassified_g__Ruminococcus	ASV223	0	0	0	0	0	0	0	0	0	0	0	0	0	0	0	34	0	0	0	0	0	0	0	0
d__Bacteria	k__norank_d__Bacteria	p__Firmicutes	c__Clostridia	o__Clostridia_UCG-014	f__norank_o__Clostridia_UCG-014	g__norank_f__norank_o__Clostridia_UCG-014	s__unclassified_g__norank_f__norank_o__Clostridia_UCG-014	ASV1877	0	0	0	0	0	0	0	0	0	0	0	0	0	0	0	0	0	0	0	0	0	12	0	0
d__Bacteria	k__norank_d__Bacteria	p__Firmicutes	c__Clostridia	o__Lachnospirales	f__Lachnospiraceae	g__Acetitomaculum	s__Firmicutes_bacterium_CAG_194_44_15	ASV2217	0	0	0	0	0	0	0	0	0	0	0	0	0	0	0	0	0	0	0	9	0	0	0	0
d__Bacteria	k__norank_d__Bacteria	p__Firmicutes	c__Clostridia	o__Clostridia_UCG-014	f__norank_o__Clostridia_UCG-014	g__norank_f__norank_o__Clostridia_UCG-014	s__unclassified_g__norank_f__norank_o__Clostridia_UCG-014	ASV1870	0	0	0	17	0	30	0	0	0	0	0	0	0	0	0	28	0	0	0	0	0	12	0	0
d__Bacteria	k__norank_d__Bacteria	p__Firmicutes	c__Clostridia	o__Oscillospirales	f__UCG-010	g__norank_f__UCG-010	s__unclassified_g__norank_f__UCG-010	ASV840	0	4	0	0	0	3	0	3	0	0	0	0	0	0	1	0	0	0	0	0	0	0	0	8
d__Bacteria	k__norank_d__Bacteria	p__Firmicutes	c__Bacilli	o__RF39	f__norank_o__RF39	g__norank_f__norank_o__RF39	s__unclassified_g__norank_f__norank_o__RF39	ASV2500	0	0	0	0	0	0	0	0	0	0	3	0	0	0	0	0	0	0	0	0	0	0	0	0
d__Bacteria	k__norank_d__Bacteria	p__unclassified_k__norank_d__Bacteria	c__unclassified_k__norank_d__Bacteria	o__unclassified_k__norank_d__Bacteria	f__unclassified_k__norank_d__Bacteria	g__unclassified_k__norank_d__Bacteria	s__unclassified_k__norank_d__Bacteria	ASV3063	5	0	0	0	0	0	0	0	0	0	0	0	0	0	0	0	0	0	0	0	0	0	0	0
d__Bacteria	k__norank_d__Bacteria	p__Cyanobacteria	c__Vampirivibrionia	o__Gastranaerophilales	f__norank_o__Gastranaerophilales	g__norank_f__norank_o__Gastranaerophilales	s__unclassified_g__norank_f__norank_o__Gastranaerophilales	ASV2103	0	0	0	0	0	0	0	0	0	3	0	0	0	0	0	0	0	0	0	0	0	0	0	0
d__Bacteria	k__norank_d__Bacteria	p__Actinobacteriota	c__Coriobacteriia	o__Coriobacteriales	f__Eggerthellaceae	g__unclassified_f__Eggerthellaceae	s__unclassified_f__Eggerthellaceae	ASV2238	0	0	0	0	0	0	0	0	0	0	0	0	0	0	0	0	0	0	0	4	0	0	0	0
d__Bacteria	k__norank_d__Bacteria	p__Firmicutes	c__Clostridia	o__Oscillospirales	f__Ruminococcaceae	g__norank_f__Ruminococcaceae	s__unclassified_g__norank_f__Ruminococcaceae	ASV2707	0	0	0	0	0	0	0	0	0	0	0	0	0	0	0	31	0	0	0	0	0	0	0	0
d__Bacteria	k__norank_d__Bacteria	p__Firmicutes	c__Bacilli	o__Bacillales	f__Bacillaceae	g__Bacillus	s__Lactobacillus_vaginalis_g__Bacillus	ASV1486	75	0	37	24	0	0	0	0	0	0	0	31	0	0	0	82	0	0	31	0	89	0	0	0
d__Bacteria	k__norank_d__Bacteria	p__Firmicutes	c__Clostridia	o__Oscillospirales	f__Ruminococcaceae	g__norank_f__Ruminococcaceae	s__unclassified_g__norank_f__Ruminococcaceae	ASV276	0	0	0	0	0	7	9	0	0	0	0	0	0	0	0	0	0	0	0	0	0	0	0	0
d__Bacteria	k__norank_d__Bacteria	p__Firmicutes	c__Clostridia	o__Oscillospirales	f__Oscillospiraceae	g__norank_f__Oscillospiraceae	s__uncultured_bacterium_g__norank_f__Oscillospiraceae	ASV727	0	14	21	0	13	0	0	25	25	12	0	11	0	0	16	10	0	25	0	0	0	17	0	27
d__Bacteria	k__norank_d__Bacteria	p__Firmicutes	c__Clostridia	o__Monoglobales	f__Monoglobaceae	g__Monoglobus	s__unclassified_g__Monoglobus	ASV1165	0	0	0	8	28	0	0	0	0	0	0	0	7	0	0	0	0	0	0	0	0	0	0	0
d__Bacteria	k__norank_d__Bacteria	p__Bacteroidota	c__Bacteroidia	o__Bacteroidales	f__Muribaculaceae	g__norank_f__Muribaculaceae	s__uncultured_bacterium_g__norank_f__Muribaculaceae	ASV78	69	63	257	41	176	123	195	61	131	0	0	96	86	194	136	118	138	67	175	142	81	74	83	0
d__Bacteria	k__norank_d__Bacteria	p__Bacteroidota	c__Bacteroidia	o__Bacteroidales	f__Muribaculaceae	g__norank_f__Muribaculaceae	s__uncultured_bacterium_g__norank_f__Muribaculaceae	ASV498	17	23	14	18	27	30	23	15	30	11	32	28	18	28	27	17	19	9	17	31	18	14	34	22
d__Bacteria	k__norank_d__Bacteria	p__Bacteroidota	c__Bacteroidia	o__Bacteroidales	f__Muribaculaceae	g__norank_f__Muribaculaceae	s__uncultured_bacterium_g__norank_f__Muribaculaceae	ASV3026	0	0	0	0	0	0	0	0	0	0	0	3	0	0	0	0	0	0	0	0	0	0	0	0
d__Bacteria	k__norank_d__Bacteria	p__Firmicutes	c__Clostridia	o__Oscillospirales	f__Oscillospiraceae	g__unclassified_f__Oscillospiraceae	s__unclassified_f__Oscillospiraceae	ASV2332	0	0	7	0	0	0	0	0	0	0	0	0	0	0	0	0	0	0	0	0	0	0	0	0
d__Bacteria	k__norank_d__Bacteria	p__Bacteroidota	c__Bacteroidia	o__Bacteroidales	f__Muribaculaceae	g__norank_f__Muribaculaceae	s__uncultured_bacterium_g__norank_f__Muribaculaceae	ASV70	23	23	11	23	35	27	0	14	0	35	33	28	0	23	42	31	33	38	21	26	37	11	0	17
d__Bacteria	k__norank_d__Bacteria	p__Desulfobacterota	c__Desulfovibrionia	o__Desulfovibrionales	f__Desulfovibrionaceae	g__Desulfovibrio	s__uncultured_bacterium_g__Desulfovibrio	ASV1568	0	0	5	18	0	0	0	0	0	0	0	0	0	0	0	0	0	0	7	0	0	7	0	0
d__Bacteria	k__norank_d__Bacteria	p__Bacteroidota	c__Bacteroidia	o__Bacteroidales	f__Muribaculaceae	g__norank_f__Muribaculaceae	s__uncultured_bacterium_g__norank_f__Muribaculaceae	ASV72	0	44	0	36	110	0	80	0	0	0	98	0	0	0	74	105	73	0	37	69	52	0	0	25
d__Bacteria	k__norank_d__Bacteria	p__Bacteroidota	c__Bacteroidia	o__Bacteroidales	f__Muribaculaceae	g__norank_f__Muribaculaceae	s__uncultured_bacterium_g__norank_f__Muribaculaceae	ASV494	0	15	30	0	28	53	0	0	31	0	0	0	0	0	23	0	0	19	34	16	17	0	0	0
d__Bacteria	k__norank_d__Bacteria	p__Firmicutes	c__Clostridia	o__Lachnospirales	f__Lachnospiraceae	g__unclassified_f__Lachnospiraceae	s__unclassified_f__Lachnospiraceae	ASV2336	0	0	7	0	0	0	0	0	0	0	0	0	0	0	0	0	0	0	0	0	0	0	0	0
d__Bacteria	k__norank_d__Bacteria	p__Bacteroidota	c__Bacteroidia	o__Bacteroidales	f__Muribaculaceae	g__norank_f__Muribaculaceae	s__uncultured_bacterium_g__norank_f__Muribaculaceae	ASV708	35	0	0	0	29	0	27	0	25	0	0	0	11	0	34	0	18	0	0	0	0	0	0	26
d__Bacteria	k__norank_d__Bacteria	p__Bacteroidota	c__Bacteroidia	o__Bacteroidales	f__Muribaculaceae	g__norank_f__Muribaculaceae	s__uncultured_bacterium_g__norank_f__Muribaculaceae	ASV2550	0	0	0	0	0	6	0	0	0	0	0	0	0	0	0	0	0	0	0	0	0	0	0	0
d__Bacteria	k__norank_d__Bacteria	p__Firmicutes	c__Clostridia	o__Oscillospirales	f__Ruminococcaceae	g__Eubacterium_siraeum_group	s__uncultured_bacterium_g__Eubacterium_siraeum_group	ASV273	10	8	0	0	0	0	16	24	0	25	0	0	0	0	14	0	0	0	15	8	0	0	0	53
d__Bacteria	k__norank_d__Bacteria	p__Bacteroidota	c__Bacteroidia	o__Bacteroidales	f__Muribaculaceae	g__norank_f__Muribaculaceae	s__uncultured_bacterium_g__norank_f__Muribaculaceae	ASV703	7	0	9	35	28	4	26	0	0	22	32	8	32	32	0	19	45	30	0	38	34	27	0	28
d__Bacteria	k__norank_d__Bacteria	p__Firmicutes	c__Clostridia	o__Lachnospirales	f__Lachnospiraceae	g__unclassified_f__Lachnospiraceae	s__unclassified_f__Lachnospiraceae	ASV1838	0	0	0	0	0	0	0	0	0	0	0	0	0	0	0	0	0	0	0	0	0	29	0	0
d__Bacteria	k__norank_d__Bacteria	p__Firmicutes	c__Clostridia	o__Lachnospirales	f__Lachnospiraceae	g__unclassified_f__Lachnospiraceae	s__unclassified_f__Lachnospiraceae	ASV1522	0	0	0	0	0	0	0	0	0	0	0	0	0	0	0	0	0	0	14	0	0	0	0	0
d__Bacteria	k__norank_d__Bacteria	p__Firmicutes	c__Clostridia	o__Lachnospirales	f__Lachnospiraceae	g__unclassified_f__Lachnospiraceae	s__unclassified_f__Lachnospiraceae	ASV1520	0	0	0	0	0	0	0	0	0	0	0	0	0	0	0	0	0	0	20	15	0	8	0	0
d__Bacteria	k__norank_d__Bacteria	p__Firmicutes	c__Clostridia	o__Oscillospirales	f__Oscillospiraceae	g__unclassified_f__Oscillospiraceae	s__unclassified_f__Oscillospiraceae	ASV778	0	0	0	0	0	0	0	0	0	0	0	0	0	0	0	0	0	0	17	0	0	0	0	15
d__Bacteria	k__norank_d__Bacteria	p__Firmicutes	c__Bacilli	o__Erysipelotrichales	f__Erysipelotrichaceae	g__norank_f__Erysipelotrichaceae	s__unclassified_g__norank_f__Erysipelotrichaceae	ASV1909	0	4	1	13	0	0	0	0	0	8	0	4	5	0	0	3	0	3	0	0	5	1	0	0
d__Bacteria	k__norank_d__Bacteria	p__Firmicutes	c__Clostridia	o__Monoglobales	f__Monoglobaceae	g__Monoglobus	s__unclassified_g__Monoglobus	ASV2493	0	0	0	0	0	0	2	0	0	0	4	0	0	0	0	2	0	0	0	0	0	0	0	0
d__Bacteria	k__norank_d__Bacteria	p__Firmicutes	c__Clostridia	o__Oscillospirales	f__Ruminococcaceae	g__Candidatus_Soleaferrea	s__unclassified_g__Candidatus_Soleaferrea	ASV2040	0	0	0	2	0	0	0	0	0	0	0	0	0	0	0	0	0	0	0	0	0	0	0	0
d__Bacteria	k__norank_d__Bacteria	p__Firmicutes	c__Clostridia	o__Oscillospirales	f__Ruminococcaceae	g__Ruminococcus	s__unclassified_g__Ruminococcus	ASV682	0	7	196	0	0	0	24	6	0	0	0	0	0	29	6	0	0	0	0	6	31	9	19	32
d__Bacteria	k__norank_d__Bacteria	p__Firmicutes	c__Clostridia	o__Clostridia_UCG-014	f__norank_o__Clostridia_UCG-014	g__norank_f__norank_o__Clostridia_UCG-014	s__unclassified_g__norank_f__norank_o__Clostridia_UCG-014	ASV2809	0	0	0	0	0	0	0	0	0	0	0	0	0	0	0	0	0	0	0	0	0	0	6	0
d__Bacteria	k__norank_d__Bacteria	p__Firmicutes	c__Clostridia	o__Peptostreptococcales-Tissierellales	f__Anaerovoracaceae	g__Eubacterium_brachy_group	s__uncultured_bacterium_g__Eubacterium_brachy_group	ASV872	3	11	9	7	0	4	8	4	3	3	0	0	0	0	0	9	20	3	0	0	2	6	0	4
d__Bacteria	k__norank_d__Bacteria	p__Desulfobacterota	c__Desulfovibrionia	o__Desulfovibrionales	f__Desulfovibrionaceae	g__Desulfovibrio	s__unclassified_g__Desulfovibrio	ASV769	0	17	0	0	0	0	31	21	0	0	0	0	0	0	0	0	28	22	0	0	0	0	0	13
d__Bacteria	k__norank_d__Bacteria	p__Firmicutes	c__Bacilli	o__Erysipelotrichales	f__Erysipelotrichaceae	g__norank_f__Erysipelotrichaceae	s__uncultured_Allobaculum_sp._g__norank	ASV1819	0	0	0	41	0	0	14	0	102	0	163	72	48	316	224	22	0	26	0	0	49	45	59	0
d__Bacteria	k__norank_d__Bacteria	p__Firmicutes	c__Clostridia	o__Lachnospirales	f__Lachnospiraceae	g__unclassified_f__Lachnospiraceae	s__unclassified_f__Lachnospiraceae	ASV330	0	0	0	5	0	0	0	0	0	0	0	0	0	0	0	0	0	0	0	0	0	0	0	0
d__Bacteria	k__norank_d__Bacteria	p__Firmicutes	c__Bacilli	o__Erysipelotrichales	f__Erysipelotrichaceae	g__norank_f__Erysipelotrichaceae	s__uncultured_Allobaculum_sp._g__norank	ASV2250	0	0	0	0	0	0	0	0	0	0	0	47	0	29	0	0	0	0	0	0	0	0	33	0
d__Bacteria	k__norank_d__Bacteria	p__Firmicutes	c__Bacilli	o__Erysipelotrichales	f__Erysipelotrichaceae	g__norank_f__Erysipelotrichaceae	s__uncultured_Allobaculum_sp._g__norank	ASV2255	0	0	0	0	0	0	0	0	0	0	0	0	0	22	0	0	0	0	0	0	0	0	0	0
d__Bacteria	k__norank_d__Bacteria	p__Firmicutes	c__Bacilli	o__Erysipelotrichales	f__Erysipelotrichaceae	g__norank_f__Erysipelotrichaceae	s__uncultured_Allobaculum_sp._g__norank	ASV2256	0	0	0	0	0	0	0	0	0	0	0	0	0	25	0	0	0	0	0	0	0	0	0	0
d__Bacteria	k__norank_d__Bacteria	p__Firmicutes	c__Clostridia	o__Oscillospirales	f__Ruminococcaceae	g__norank_f__Ruminococcaceae	s__unclassified_g__norank_f__Ruminococcaceae	ASV2805	0	0	0	0	0	0	0	0	0	0	0	0	0	0	0	0	0	0	0	0	0	0	11	0
d__Bacteria	k__norank_d__Bacteria	p__Firmicutes	c__Clostridia	o__Lachnospirales	f__Lachnospiraceae	g__Lachnospiraceae_NK4A136_group	s__uncultured_bacterium_g__Lachnospiraceae_NK4A136_group	ASV2514	0	0	0	0	0	70	0	0	0	0	0	0	0	0	0	0	0	0	0	0	0	0	0	0
d__Bacteria	k__norank_d__Bacteria	p__Firmicutes	c__Clostridia	o__Clostridia_vadinBB60_group	f__norank_o__Clostridia_vadinBB60_group	g__norank_f__norank_o__Clostridia_vadinBB60_group	s__unclassified_g__norank_f__norank_o__Clostridia_vadinBB60_group	ASV2683	0	0	0	0	0	0	0	0	0	0	0	0	0	0	0	0	0	0	0	0	6	0	0	0
d__Bacteria	k__norank_d__Bacteria	p__Firmicutes	c__Clostridia	o__Oscillospirales	f__Oscillospiraceae	g__UCG-005	s__uncultured_Clostridiales_bacterium_g__UCG-005	ASV2416	0	0	0	0	0	0	0	0	5	0	0	0	0	0	0	0	0	10	0	0	0	0	25	0
d__Bacteria	k__norank_d__Bacteria	p__Firmicutes	c__Clostridia	o__Lachnospirales	f__Lachnospiraceae	g__unclassified_f__Lachnospiraceae	s__unclassified_f__Lachnospiraceae	ASV842	0	0	0	0	0	0	0	0	0	0	0	0	0	0	0	0	0	0	0	0	0	0	0	9
d__Bacteria	k__norank_d__Bacteria	p__Firmicutes	c__Bacilli	o__Bacillales	f__Bacillaceae	g__Bacillus	s__Lactobacillus_vaginalis_g__Bacillus	ASV2070	0	0	0	0	0	0	0	0	0	17	0	0	0	0	0	0	0	0	0	0	0	0	0	0
d__Bacteria	k__norank_d__Bacteria	p__Firmicutes	c__Bacilli	o__Bacillales	f__Bacillaceae	g__Bacillus	s__Lactobacillus_vaginalis_g__Bacillus	ASV2075	0	0	0	0	0	0	0	0	0	18	0	0	0	0	0	0	0	0	0	0	0	0	0	0
d__Bacteria	k__norank_d__Bacteria	p__Firmicutes	c__Bacilli	o__unclassified_c__Bacilli	f__unclassified_c__Bacilli	g__unclassified_c__Bacilli	s__unclassified_c__Bacilli	ASV2472	0	0	0	0	0	0	0	0	0	0	8	0	0	0	0	0	0	0	0	0	0	0	0	0
d__Bacteria	k__norank_d__Bacteria	p__Firmicutes	c__Clostridia	o__Peptostreptococcales-Tissierellales	f__Anaerovoracaceae	g__Eubacterium_brachy_group	s__uncultured_bacterium_g__Eubacterium_brachy_group	ASV908	0	1	10	4	0	0	0	0	0	0	22	0	0	9	0	0	0	7	0	0	0	0	0	3
d__Bacteria	k__norank_d__Bacteria	p__Patescibacteria	c__Saccharimonadia	o__Saccharimonadales	f__Saccharimonadaceae	g__Candidatus_Saccharimonas	s__uncultured_bacterium_g__Candidatus_Saccharimonas	ASV998	0	0	0	0	0	0	0	0	0	0	24	0	0	0	0	18	0	0	0	0	0	0	0	0
d__Bacteria	k__norank_d__Bacteria	p__Firmicutes	c__Clostridia	o__Lachnospirales	f__Lachnospiraceae	g__unclassified_f__Lachnospiraceae	s__unclassified_f__Lachnospiraceae	ASV156	14	0	0	25	0	0	0	24	0	47	0	0	27	9	0	0	0	28	0	28	9	21	0	0
d__Bacteria	k__norank_d__Bacteria	p__Bacteroidota	c__Bacteroidia	o__Bacteroidales	f__Muribaculaceae	g__norank_f__Muribaculaceae	s__uncultured_bacterium_g__norank_f__Muribaculaceae	ASV1159	0	0	0	0	37	0	0	0	0	0	0	28	38	0	0	0	28	0	0	32	33	0	0	0
d__Bacteria	k__norank_d__Bacteria	p__Bacteroidota	c__Bacteroidia	o__Bacteroidales	f__Muribaculaceae	g__norank_f__Muribaculaceae	s__uncultured_bacterium_g__norank_f__Muribaculaceae	ASV1156	95	20	44	28	36	173	3	13	21	57	17	0	54	75	60	16	13	9	21	0	0	66	0	0
d__Bacteria	k__norank_d__Bacteria	p__Bacteroidota	c__Bacteroidia	o__Bacteroidales	f__Muribaculaceae	g__norank_f__Muribaculaceae	s__uncultured_bacterium_g__norank_f__Muribaculaceae	ASV1155	0	0	0	0	43	0	0	0	0	0	0	0	0	0	0	0	0	0	0	0	0	0	0	0
d__Bacteria	k__norank_d__Bacteria	p__Bacteroidota	c__Bacteroidia	o__Bacteroidales	f__Muribaculaceae	g__norank_f__Muribaculaceae	s__uncultured_bacterium_g__norank_f__Muribaculaceae	ASV1152	0	0	0	0	42	0	0	0	0	0	0	0	0	0	0	0	0	0	0	0	0	0	0	0
d__Bacteria	k__norank_d__Bacteria	p__Bacteroidota	c__Bacteroidia	o__Bacteroidales	f__Muribaculaceae	g__norank_f__Muribaculaceae	s__uncultured_bacterium_g__norank_f__Muribaculaceae	ASV1150	0	5	0	11	42	0	0	0	0	0	29	0	0	20	0	3	31	0	0	67	0	7	0	0
d__Bacteria	k__norank_d__Bacteria	p__Bacteroidota	c__Bacteroidia	o__Bacteroidales	f__Muribaculaceae	g__norank_f__Muribaculaceae	s__uncultured_bacterium_g__norank_f__Muribaculaceae	ASV671	0	0	0	0	0	0	0	0	0	0	0	0	0	0	0	0	0	0	0	0	0	0	34	40
d__Bacteria	k__norank_d__Bacteria	p__Desulfobacterota	c__Desulfovibrionia	o__Desulfovibrionales	f__Desulfovibrionaceae	g__Desulfovibrio	s__uncultured_bacterium_g__Desulfovibrio	ASV2899	0	11	0	0	0	0	0	0	0	0	0	0	0	0	0	0	0	0	0	0	0	0	0	0
d__Bacteria	k__norank_d__Bacteria	p__Bacteroidota	c__Bacteroidia	o__Bacteroidales	f__Muribaculaceae	g__norank_f__Muribaculaceae	s__uncultured_bacterium_g__norank_f__Muribaculaceae	ASV677	0	34	172	54	27	0	24	27	64	33	215	27	0	51	45	196	31	134	70	0	100	51	90	32
d__Bacteria	k__norank_d__Bacteria	p__Bacteroidota	c__Bacteroidia	o__Bacteroidales	f__Muribaculaceae	g__norank_f__Muribaculaceae	s__uncultured_bacterium_g__norank_f__Muribaculaceae	ASV678	87	0	0	0	23	140	27	0	37	0	18	0	0	0	0	45	21	0	30	0	0	45	0	35
d__Bacteria	k__norank_d__Bacteria	p__Firmicutes	c__Clostridia	o__Lachnospirales	f__Lachnospiraceae	g__unclassified_f__Lachnospiraceae	s__unclassified_f__Lachnospiraceae	ASV800	0	13	0	0	0	0	22	6	0	0	0	0	0	0	8	0	0	0	0	0	7	19	0	11
d__Bacteria	k__norank_d__Bacteria	p__Firmicutes	c__Bacilli	o__Lactobacillales	f__Lactobacillaceae	g__Lactobacillus	s__unclassified_g__Lactobacillus	ASV2913	0	0	0	0	0	0	0	0	0	0	0	0	40	0	0	0	0	0	0	0	0	0	0	0
d__Bacteria	k__norank_d__Bacteria	p__Bacteroidota	c__Bacteroidia	o__Bacteroidales	f__Muribaculaceae	g__norank_f__Muribaculaceae	s__uncultured_bacterium_g__norank_f__Muribaculaceae	ASV1553	16	19	0	24	0	0	8	22	0	26	0	0	0	0	18	0	15	0	9	23	20	0	0	0
d__Bacteria	k__norank_d__Bacteria	p__Firmicutes	c__Bacilli	o__Lactobacillales	f__Lactobacillaceae	g__Lactobacillus	s__unclassified_g__Lactobacillus	ASV2911	0	0	0	0	0	0	0	0	0	0	0	0	114	0	0	0	0	0	0	0	0	0	0	0
d__Bacteria	k__norank_d__Bacteria	p__Bacteroidota	c__Bacteroidia	o__Bacteroidales	f__Muribaculaceae	g__norank_f__Muribaculaceae	s__unclassified_g__norank_f__Muribaculaceae	ASV838	0	0	12	0	0	0	0	0	0	0	0	0	0	0	0	0	0	0	0	0	0	0	0	11
d__Bacteria	k__norank_d__Bacteria	p__Bacteroidota	c__Bacteroidia	o__Bacteroidales	f__Marinifilaceae	g__Odoribacter	s__unclassified_g__Odoribacter	ASV2369	0	0	0	0	0	0	0	0	35	0	0	0	0	0	0	13	0	0	0	0	0	0	0	0
d__Bacteria	k__norank_d__Bacteria	p__Bacteroidota	c__Bacteroidia	o__Bacteroidales	f__Muribaculaceae	g__norank_f__Muribaculaceae	s__uncultured_bacterium_g__norank_f__Muribaculaceae	ASV1558	0	0	0	0	0	0	12	10	0	0	9	0	9	14	20	0	0	0	10	0	0	0	23	0
d__Bacteria	k__norank_d__Bacteria	p__Firmicutes	c__Bacilli	o__Lactobacillales	f__Lactobacillaceae	g__Lactobacillus	s__unclassified_g__Lactobacillus	ASV2918	0	0	0	0	0	0	0	0	0	0	0	0	8	0	0	0	0	0	0	0	0	0	0	0
d__Bacteria	k__norank_d__Bacteria	p__Firmicutes	c__Bacilli	o__Bacillales	f__Planococcaceae	g__Sporosarcina	s__Sporosarcina_pasteurii	ASV2458	0	0	0	0	0	0	0	0	0	0	18	0	0	0	0	0	0	0	0	0	0	0	0	0
d__Bacteria	k__norank_d__Bacteria	p__Firmicutes	c__Clostridia	o__Lachnospirales	f__Lachnospiraceae	g__unclassified_f__Lachnospiraceae	s__unclassified_f__Lachnospiraceae	ASV1015	20	0	0	13	0	15	0	0	0	0	0	17	11	0	0	0	0	0	8	14	12	0	0	0
d__Bacteria	k__norank_d__Bacteria	p__Firmicutes	c__Clostridia	o__Lachnospirales	f__Lachnospiraceae	g__unclassified_f__Lachnospiraceae	s__unclassified_f__Lachnospiraceae	ASV1010	0	0	27	0	0	0	0	0	0	0	0	0	0	0	0	0	0	0	0	0	0	0	0	0
d__Bacteria	k__norank_d__Bacteria	p__Firmicutes	c__Clostridia	o__Clostridia_UCG-014	f__norank_o__Clostridia_UCG-014	g__norank_f__norank_o__Clostridia_UCG-014	s__unclassified_g__norank_f__norank_o__Clostridia_UCG-014	ASV2379	44	0	0	0	0	0	0	26	25	0	0	0	0	0	0	0	0	0	0	0	0	0	0	0
d__Bacteria	k__norank_d__Bacteria	p__Bacteroidota	c__Bacteroidia	o__Bacteroidales	f__Muribaculaceae	g__norank_f__Muribaculaceae	s__uncultured_bacterium_g__norank_f__Muribaculaceae	ASV2011	0	0	0	5	0	0	0	0	0	0	0	0	26	0	0	6	31	0	0	0	0	0	0	0
d__Bacteria	k__norank_d__Bacteria	p__Firmicutes	c__Clostridia	o__Clostridia_UCG-014	f__norank_o__Clostridia_UCG-014	g__norank_f__norank_o__Clostridia_UCG-014	s__unclassified_g__norank_f__norank_o__Clostridia_UCG-014	ASV2372	0	0	0	0	0	0	0	0	27	0	0	0	0	0	0	0	0	0	0	0	0	0	0	0
d__Bacteria	k__norank_d__Bacteria	p__Firmicutes	c__Bacilli	o__Lactobacillales	f__Lactobacillaceae	g__Lactobacillus	s__unclassified_g__Lactobacillus	ASV1807	119	50	16	47	0	25	0	0	61	0	53	166	0	245	0	40	62	0	0	384	0	129	0	0
d__Bacteria	k__norank_d__Bacteria	p__Firmicutes	c__Clostridia	o__Oscillospirales	f__Oscillospiraceae	g__norank_f__Oscillospiraceae	s__unclassified_g__norank_f__Oscillospiraceae	ASV2093	0	0	0	0	0	0	0	0	0	7	0	0	0	0	0	0	0	0	0	0	0	0	0	0
d__Bacteria	k__norank_d__Bacteria	p__Firmicutes	c__Clostridia	o__Clostridia_UCG-014	f__norank_o__Clostridia_UCG-014	g__norank_f__norank_o__Clostridia_UCG-014	s__unclassified_g__norank_f__norank_o__Clostridia_UCG-014	ASV2375	0	0	0	0	0	0	0	0	26	0	0	0	0	0	0	0	0	0	0	0	0	0	0	0
d__Bacteria	k__norank_d__Bacteria	p__Firmicutes	c__Clostridia	o__Oscillospirales	f__Butyricicoccaceae	g__UCG-009	s__uncultured_organism_g__UCG-009	ASV2538	0	0	0	0	0	8	0	0	0	0	0	0	8	0	0	5	0	0	0	0	4	0	0	0
d__Bacteria	k__norank_d__Bacteria	p__Bacteroidota	c__Bacteroidia	o__Bacteroidales	f__Muribaculaceae	g__norank_f__Muribaculaceae	s__uncultured_bacterium_g__norank_f__Muribaculaceae	ASV2463	0	0	0	0	0	0	0	0	0	0	15	44	0	0	0	0	0	26	0	0	0	0	0	0
d__Bacteria	k__norank_d__Bacteria	p__Firmicutes	c__Clostridia	o__Clostridia_vadinBB60_group	f__norank_o__Clostridia_vadinBB60_group	g__norank_f__norank_o__Clostridia_vadinBB60_group	s__uncultured_bacterium_g__norank_f__norank_o__Clostridia_vadinBB60_group	ASV2337	0	0	6	0	0	0	0	0	0	0	0	0	0	0	0	0	0	0	0	0	0	0	0	0
d__Bacteria	k__norank_d__Bacteria	p__Firmicutes	c__Clostridia	o__Oscillospirales	f__Oscillospiraceae	g__NK4A214_group	s__unclassified_g__NK4A214_group	ASV2439	0	0	0	0	0	0	0	0	0	0	77	0	0	0	0	0	0	0	0	0	0	0	0	0
d__Bacteria	k__norank_d__Bacteria	p__unclassified_k__norank_d__Bacteria	c__unclassified_k__norank_d__Bacteria	o__unclassified_k__norank_d__Bacteria	f__unclassified_k__norank_d__Bacteria	g__unclassified_k__norank_d__Bacteria	s__unclassified_k__norank_d__Bacteria	ASV2793	0	0	0	0	0	0	0	1	0	0	0	0	0	0	0	0	0	0	0	0	0	0	0	0
d__Bacteria	k__norank_d__Bacteria	p__Firmicutes	c__Clostridia	o__Oscillospirales	f__Oscillospiraceae	g__unclassified_f__Oscillospiraceae	s__unclassified_f__Oscillospiraceae	ASV1832	0	11	10	0	0	21	0	13	18	0	0	0	0	0	0	0	0	0	0	0	0	28	0	0
d__Bacteria	k__norank_d__Bacteria	p__Firmicutes	c__Clostridia	o__Lachnospirales	f__Lachnospiraceae	g__Acetatifactor	s__unclassified_g__Acetatifactor	ASV2386	0	0	0	0	0	0	14	0	18	0	0	0	0	0	0	0	0	0	0	0	0	0	0	0
d__Bacteria	k__norank_d__Bacteria	p__Firmicutes	c__Clostridia	o__Oscillospirales	f__Oscillospiraceae	g__unclassified_f__Oscillospiraceae	s__unclassified_f__Oscillospiraceae	ASV1839	0	0	0	0	0	0	0	8	3	0	4	0	0	0	0	20	0	0	0	0	0	31	0	0
d__Bacteria	k__norank_d__Bacteria	p__Firmicutes	c__Bacilli	o__Lactobacillales	f__Lactobacillaceae	g__Lactobacillus	s__unclassified_g__Lactobacillus	ASV648	0	51	0	0	0	0	0	52	0	0	0	37	0	0	0	0	60	0	0	0	0	0	0	45
d__Bacteria	k__norank_d__Bacteria	p__Bacteroidota	c__Bacteroidia	o__Bacteroidales	f__Muribaculaceae	g__norank_f__Muribaculaceae	s__uncultured_bacterium_g__norank_f__Muribaculaceae	ASV2309	0	0	13	0	0	0	0	0	15	0	22	0	0	0	0	7	0	14	0	0	9	0	0	0
d__Bacteria	k__norank_d__Bacteria	p__Firmicutes	c__Bacilli	o__RF39	f__norank_o__RF39	g__norank_f__norank_o__RF39	s__metagenome_g__norank_f__norank_o__RF39	ASV2554	0	0	0	0	0	4	0	0	0	0	0	0	0	0	0	0	0	0	0	0	0	0	0	0
d__Bacteria	k__norank_d__Bacteria	p__Firmicutes	c__Clostridia	o__Oscillospirales	f__Oscillospiraceae	g__norank_f__Oscillospiraceae	s__unclassified_g__norank_f__Oscillospiraceae	ASV2891	0	31	0	0	0	0	0	0	0	0	0	0	0	0	0	0	0	0	0	0	0	0	0	0
d__Bacteria	k__norank_d__Bacteria	p__Desulfobacterota	c__Desulfovibrionia	o__Desulfovibrionales	f__Desulfovibrionaceae	g__Desulfovibrio	s__uncultured_bacterium_g__Desulfovibrio	ASV2327	0	0	9	0	0	0	0	7	0	0	5	0	0	0	0	0	0	0	0	0	0	0	0	0
d__Bacteria	k__norank_d__Bacteria	p__Firmicutes	c__Bacilli	o__RF39	f__norank_o__RF39	g__norank_f__norank_o__RF39	s__unclassified_g__norank_f__norank_o__RF39	ASV2432	0	0	0	0	0	0	0	0	2	0	0	0	0	0	0	0	0	0	0	0	0	0	0	0
d__Bacteria	k__norank_d__Bacteria	p__Bacteroidota	c__Bacteroidia	o__Bacteroidales	f__Muribaculaceae	g__norank_f__Muribaculaceae	s__unclassified_g__norank_f__Muribaculaceae	ASV2903	0	9	0	0	0	0	0	0	0	0	0	0	0	0	0	0	0	0	0	0	0	0	0	0
d__Bacteria	k__norank_d__Bacteria	p__Firmicutes	c__Clostridia	o__Clostridia_UCG-014	f__norank_o__Clostridia_UCG-014	g__norank_f__norank_o__Clostridia_UCG-014	s__unclassified_g__norank_f__norank_o__Clostridia_UCG-014	ASV1064	19	0	124	4	0	0	0	0	0	0	7	0	0	0	0	0	4	0	0	6	0	0	0	0
d__Bacteria	k__norank_d__Bacteria	p__Firmicutes	c__Clostridia	o__Oscillospirales	f__Ruminococcaceae	g__unclassified_f__Ruminococcaceae	s__unclassified_f__Ruminococcaceae	ASV2080	0	0	0	0	0	0	0	0	0	13	0	0	0	0	0	0	0	0	0	0	0	0	0	0
d__Bacteria	k__norank_d__Bacteria	p__Firmicutes	c__Bacilli	o__Lactobacillales	f__Lactobacillaceae	g__Lactobacillus	s__unclassified_g__Lactobacillus	ASV1856	0	0	0	0	0	0	0	0	0	0	0	0	0	0	0	88	0	0	0	0	0	21	38	0
d__Bacteria	k__norank_d__Bacteria	p__Spirochaetota	c__Spirochaetia	o__Spirochaetales	f__Spirochaetaceae	g__GWE2-31-10	s__uncultured_bacterium_g__GWE2-31-10	ASV1965	0	0	7	15	0	9	0	0	9	0	2	0	0	0	0	0	0	1	0	0	0	0	25	0
d__Bacteria	k__norank_d__Bacteria	p__Firmicutes	c__Clostridia	o__Clostridia_UCG-014	f__norank_o__Clostridia_UCG-014	g__norank_f__norank_o__Clostridia_UCG-014	s__unclassified_g__norank_f__norank_o__Clostridia_UCG-014	ASV1112	0	0	0	0	0	0	0	0	0	0	5	0	0	0	0	3	0	0	0	0	6	0	3	0
d__Bacteria	k__norank_d__Bacteria	p__Actinobacteriota	c__Actinobacteria	o__Corynebacteriales	f__Corynebacteriaceae	g__Corynebacterium	s__unclassified_g__Corynebacterium	ASV2553	0	0	0	0	0	5	0	0	0	0	0	0	0	0	0	1	0	0	0	0	0	0	0	0
d__Bacteria	k__norank_d__Bacteria	p__Firmicutes	c__Clostridia	o__Oscillospirales	f__Ruminococcaceae	g__UBA1819	s__uncultured_bacterium_g__UBA1819	ASV871	0	0	0	0	0	8	0	0	0	6	0	0	0	0	0	0	0	0	0	0	0	0	0	6
d__Bacteria	k__norank_d__Bacteria	p__Firmicutes	c__Clostridia	o__Monoglobales	f__Monoglobaceae	g__Monoglobus	s__uncultured_bacterium_g__Monoglobus	ASV881	0	0	0	0	0	0	0	0	0	0	0	0	0	0	0	0	0	0	0	0	0	0	0	6
d__Bacteria	k__norank_d__Bacteria	p__Firmicutes	c__Bacilli	o__Acholeplasmatales	f__Acholeplasmataceae	g__Anaeroplasma	s__uncultured_bacterium_g__Anaeroplasma	ASV2794	0	0	0	0	0	0	0	1	0	0	0	0	0	0	0	0	0	0	0	0	0	0	0	0
d__Bacteria	k__norank_d__Bacteria	p__Firmicutes	c__Bacilli	o__unclassified_c__Bacilli	f__unclassified_c__Bacilli	g__unclassified_c__Bacilli	s__unclassified_c__Bacilli	ASV3051	20	0	0	0	0	0	0	0	0	0	0	0	0	0	0	0	0	0	0	0	0	0	0	0
d__Bacteria	k__norank_d__Bacteria	p__Firmicutes	c__Clostridia	o__Monoglobales	f__Monoglobaceae	g__Monoglobus	s__unclassified_g__Monoglobus	ASV1563	0	0	0	10	0	0	7	2	0	0	0	0	0	0	0	0	0	5	10	3	0	0	0	0
d__Bacteria	k__norank_d__Bacteria	p__Bacteroidota	c__Bacteroidia	o__Bacteroidales	f__Tannerellaceae	g__Parabacteroides	s__unclassified_g__Parabacteroides	ASV1600	0	0	0	0	0	0	0	0	0	5	4	5	0	0	4	6	0	0	1	0	0	0	5	0
d__Bacteria	k__norank_d__Bacteria	p__Firmicutes	c__Clostridia	o__Oscillospirales	f__Ruminococcaceae	g__Eubacterium_siraeum_group	s__unclassified_g__Eubacterium_siraeum_group	ASV861	0	0	11	0	0	0	9	9	0	9	0	0	0	0	0	0	9	0	0	0	0	0	8	9
d__Bacteria	k__norank_d__Bacteria	p__Firmicutes	c__Clostridia	o__Oscillospirales	f__Ruminococcaceae	g__Anaerofilum	s__uncultured_bacterium_g__Anaerofilum	ASV2106	0	0	0	0	0	0	0	0	0	1	0	0	0	0	0	0	0	0	0	0	0	0	0	0
d__Bacteria	k__norank_d__Bacteria	p__Bacteroidota	c__Bacteroidia	o__Bacteroidales	f__Muribaculaceae	g__norank_f__Muribaculaceae	s__uncultured_bacterium_g__norank_f__Muribaculaceae	ASV1979	0	0	0	11	0	0	0	0	0	0	0	0	0	0	0	0	0	0	0	0	0	0	0	0
d__Bacteria	k__norank_d__Bacteria	p__Firmicutes	c__Clostridia	o__Lachnospirales	f__Lachnospiraceae	g__Lachnospiraceae_NK4A136_group	s__unclassified_g__Lachnospiraceae_NK4A136_group	ASV1473	0	0	0	0	0	0	0	0	0	0	0	0	0	0	0	0	0	0	42	0	0	0	0	0
d__Bacteria	k__norank_d__Bacteria	p__Desulfobacterota	c__Desulfovibrionia	o__Desulfovibrionales	f__Desulfovibrionaceae	g__unclassified_f__Desulfovibrionaceae	s__unclassified_f__Desulfovibrionaceae	ASV848	0	0	10	0	0	0	6	4	7	4	0	5	0	0	0	3	4	5	0	0	0	0	3	7
d__Bacteria	k__norank_d__Bacteria	p__Bacteroidota	c__Bacteroidia	o__Bacteroidales	f__Muribaculaceae	g__norank_f__Muribaculaceae	s__uncultured_bacterium_g__norank_f__Muribaculaceae	ASV1971	0	0	0	11	0	0	0	0	0	0	0	0	0	11	0	0	0	0	0	0	0	0	0	0
d__Bacteria	k__norank_d__Bacteria	p__Firmicutes	c__Clostridia	o__Peptostreptococcales-Tissierellales	f__Anaerovoracaceae	g__Family_XIII_AD3011_group	s__unclassified_g__Family_XIII_AD3011_group	ASV2931	0	0	0	0	0	0	0	0	0	0	0	0	3	0	0	0	0	0	0	0	0	0	0	0
d__Bacteria	k__norank_d__Bacteria	p__Firmicutes	c__Clostridia	o__Clostridia_UCG-014	f__norank_o__Clostridia_UCG-014	g__norank_f__norank_o__Clostridia_UCG-014	s__unclassified_g__norank_f__norank_o__Clostridia_UCG-014	ASV3084	0	0	0	0	0	0	13	0	0	0	0	0	0	0	0	0	0	0	0	0	0	0	0	0
d__Bacteria	k__norank_d__Bacteria	p__Bacteroidota	c__Bacteroidia	o__Bacteroidales	f__Muribaculaceae	g__norank_f__Muribaculaceae	s__uncultured_bacterium_g__norank_f__Muribaculaceae	ASV2772	0	0	0	0	0	0	0	9	0	0	0	0	0	0	0	0	0	0	0	0	0	0	0	0
d__Bacteria	k__norank_d__Bacteria	p__Bacteroidota	c__Bacteroidia	o__Bacteroidales	f__Muribaculaceae	g__norank_f__Muribaculaceae	s__uncultured_bacterium_g__norank_f__Muribaculaceae	ASV2179	0	12	18	0	0	0	0	0	0	0	0	0	0	0	0	0	0	0	0	66	0	0	0	0
d__Bacteria	k__norank_d__Bacteria	p__Firmicutes	c__Clostridia	o__Lachnospirales	f__Lachnospiraceae	g__unclassified_f__Lachnospiraceae	s__unclassified_f__Lachnospiraceae	ASV1653	0	0	0	0	0	0	0	0	0	18	0	0	0	0	0	0	0	0	0	0	0	28	0	0
d__Bacteria	k__norank_d__Bacteria	p__Firmicutes	c__Clostridia	o__Lachnospirales	f__Lachnospiraceae	g__Roseburia	s__unclassified_g__Roseburia	ASV2776	0	0	0	0	0	0	0	7	0	0	0	0	0	0	0	0	0	0	0	0	0	0	0	0
d__Bacteria	k__norank_d__Bacteria	p__Bacteroidota	c__Bacteroidia	o__Bacteroidales	f__Muribaculaceae	g__norank_f__Muribaculaceae	s__uncultured_bacterium_g__norank_f__Muribaculaceae	ASV806	15	0	15	11	12	23	58	9	16	31	0	19	17	11	0	16	24	0	45	13	22	0	22	12
d__Bacteria	k__norank_d__Bacteria	p__Bacteroidota	c__Bacteroidia	o__Bacteroidales	f__Muribaculaceae	g__norank_f__Muribaculaceae	s__uncultured_bacterium_g__norank_f__Muribaculaceae	ASV805	8	6	0	0	0	67	0	13	0	21	0	7	0	61	0	1	0	0	6	35	0	52	25	12
d__Bacteria	k__norank_d__Bacteria	p__Firmicutes	c__Clostridia	o__Oscillospirales	f__Oscillospiraceae	g__norank_f__Oscillospiraceae	s__unclassified_g__norank_f__Oscillospiraceae	ASV2365	0	0	0	0	0	0	0	0	36	0	30	0	0	0	0	0	0	0	0	0	0	0	0	0
d__Bacteria	k__norank_d__Bacteria	p__Bacteroidota	c__Bacteroidia	o__Bacteroidales	f__Muribaculaceae	g__norank_f__Muribaculaceae	s__uncultured_bacterium_g__norank_f__Muribaculaceae	ASV2177	0	0	0	0	0	59	0	0	0	0	0	0	0	0	0	0	0	0	0	79	0	0	0	0
d__Bacteria	k__norank_d__Bacteria	p__Firmicutes	c__Clostridia	o__Lachnospirales	f__Lachnospiraceae	g__Lachnospiraceae_NK4A136_group	s__unclassified_g__Lachnospiraceae_NK4A136_group	ASV1615	0	0	0	0	0	412	0	0	0	0	15	56	0	0	0	0	52	0	0	0	0	0	222	0
d__Bacteria	k__norank_d__Bacteria	p__Bacteroidota	c__Bacteroidia	o__Bacteroidales	f__Muribaculaceae	g__norank_f__Muribaculaceae	s__uncultured_bacterium_g__norank_f__Muribaculaceae	ASV245	0	0	0	0	0	6	0	0	0	0	0	0	0	11	0	0	0	0	0	0	0	0	0	0
d__Bacteria	k__norank_d__Bacteria	p__Firmicutes	c__Clostridia	o__Clostridia_UCG-014	f__norank_o__Clostridia_UCG-014	g__norank_f__norank_o__Clostridia_UCG-014	s__uncultured_bacterium_g__norank_f__norank_o__Clostridia_UCG-014	ASV1027	0	0	30	0	0	0	0	0	0	0	0	0	0	0	0	0	0	0	0	0	0	0	0	0
d__Bacteria	k__norank_d__Bacteria	p__Verrucomicrobiota	c__Verrucomicrobiae	o__Opitutales	f__Puniceicoccaceae	g__norank_f__Puniceicoccaceae	s__uncultured_Verrucomicrobia_bacterium_g__norank_f__Puniceicoccaceae	ASV2016	0	3	3	3	0	3	0	0	0	0	2	0	0	0	0	0	0	0	0	0	0	0	13	0
d__Bacteria	k__norank_d__Bacteria	p__Firmicutes	c__Bacilli	o__Lactobacillales	f__Lactobacillaceae	g__Lactobacillus	s__unclassified_g__Lactobacillus	ASV1232	0	0	0	0	2	0	0	0	0	0	0	0	0	0	0	0	0	0	0	0	0	0	0	0
d__Bacteria	k__norank_d__Bacteria	p__Proteobacteria	c__Alphaproteobacteria	o__Rhodospirillales	f__norank_o__Rhodospirillales	g__norank_f__norank_o__Rhodospirillales	s__gut_metagenome_g__norank	ASV2685	0	0	0	0	0	0	0	0	0	0	0	0	0	0	0	0	0	0	0	0	8	0	0	0
d__Bacteria	k__norank_d__Bacteria	p__Firmicutes	c__Clostridia	o__Peptostreptococcales-Tissierellales	f__Anaerovoracaceae	g__Eubacterium_nodatum_group	s__uncultured_organism_g__Eubacterium_nodatum_group	ASV259	5	0	5	0	4	2	7	0	0	0	22	5	2	0	0	0	2	8	1	2	2	3	14	0
d__Bacteria	k__norank_d__Bacteria	p__Firmicutes	c__Clostridia	o__Clostridia_vadinBB60_group	f__norank_o__Clostridia_vadinBB60_group	g__norank_f__norank_o__Clostridia_vadinBB60_group	s__uncultured_bacterium_g__norank_f__norank_o__Clostridia_vadinBB60_group	ASV824	0	0	0	0	0	0	0	8	6	0	0	0	0	0	0	0	0	0	0	0	0	0	0	8
d__Bacteria	k__norank_d__Bacteria	p__Bacteroidota	c__Bacteroidia	o__Bacteroidales	f__Muribaculaceae	g__norank_f__Muribaculaceae	s__uncultured_bacterium_g__norank_f__Muribaculaceae	ASV642	66	76	87	73	0	60	0	33	37	90	0	37	32	51	0	0	0	79	0	98	120	53	66	42
d__Bacteria	k__norank_d__Bacteria	p__Firmicutes	c__Clostridia	o__Lachnospirales	f__Lachnospiraceae	g__unclassified_f__Lachnospiraceae	s__unclassified_f__Lachnospiraceae	ASV2786	0	0	0	0	0	0	0	3	0	0	0	0	5	0	0	0	0	0	0	0	0	0	0	0
d__Bacteria	k__norank_d__Bacteria	p__Firmicutes	c__Clostridia	o__Lachnospirales	f__Lachnospiraceae	g__unclassified_f__Lachnospiraceae	s__unclassified_f__Lachnospiraceae	ASV810	0	0	0	0	0	0	0	0	0	0	0	0	0	0	0	0	3	0	0	0	0	0	0	12
d__Bacteria	k__norank_d__Bacteria	p__Bacteroidota	c__Bacteroidia	o__Bacteroidales	f__Muribaculaceae	g__norank_f__Muribaculaceae	s__uncultured_bacterium_g__norank_f__Muribaculaceae	ASV399	58	38	0	5	31	22	23	46	0	61	19	14	22	11	41	6	20	0	0	43	6	17	26	31
d__Bacteria	k__norank_d__Bacteria	p__Bacteroidota	c__Bacteroidia	o__Bacteroidales	f__Muribaculaceae	g__norank_f__Muribaculaceae	s__uncultured_bacterium_g__norank_f__Muribaculaceae	ASV1527	0	0	43	0	0	0	0	0	32	0	0	0	0	0	0	0	0	27	17	109	31	0	69	0
d__Bacteria	k__norank_d__Bacteria	p__Firmicutes	c__Bacilli	o__Bacillales	f__Bacillaceae	g__Bacillus	s__Lactobacillus_vaginalis_g__Bacillus	ASV2660	34	0	0	0	0	0	0	0	0	0	0	0	0	0	0	41	0	0	0	0	37	0	0	0
d__Bacteria	k__norank_d__Bacteria	p__Bacteroidota	c__Bacteroidia	o__Bacteroidales	f__Muribaculaceae	g__norank_f__Muribaculaceae	s__uncultured_bacterium_g__norank_f__Muribaculaceae	ASV1524	33	53	0	28	0	63	0	0	0	65	14	0	0	28	49	0	29	23	17	72	13	60	35	0
d__Bacteria	k__norank_d__Bacteria	p__Bacteroidota	c__Bacteroidia	o__Bacteroidales	f__Muribaculaceae	g__norank_f__Muribaculaceae	s__uncultured_bacterium_g__norank_f__Muribaculaceae	ASV1521	121	0	0	0	0	0	0	0	0	0	0	0	0	18	0	0	0	0	19	0	0	0	5	0
d__Bacteria	k__norank_d__Bacteria	p__Bacteroidota	c__Bacteroidia	o__Bacteroidales	f__Muribaculaceae	g__norank_f__Muribaculaceae	s__unclassified_g__norank_f__Muribaculaceae	ASV849	13	0	0	38	0	0	0	0	62	0	23	103	0	48	0	22	0	50	0	0	93	0	0	10
d__Bacteria	k__norank_d__Bacteria	p__Firmicutes	c__Clostridia	o__Lachnospirales	f__Lachnospiraceae	g__unclassified_f__Lachnospiraceae	s__unclassified_f__Lachnospiraceae	ASV3090	0	0	0	0	0	0	5	0	0	0	0	0	0	0	0	0	0	0	0	0	0	0	0	0
d__Bacteria	k__norank_d__Bacteria	p__Firmicutes	c__Clostridia	o__Lachnospirales	f__Lachnospiraceae	g__unclassified_f__Lachnospiraceae	s__unclassified_f__Lachnospiraceae	ASV3092	0	0	0	0	0	0	5	0	0	0	0	0	0	0	0	0	0	0	0	0	0	0	0	0
d__Bacteria	k__norank_d__Bacteria	p__Firmicutes	c__Clostridia	o__Lachnospirales	f__Lachnospiraceae	g__unclassified_f__Lachnospiraceae	s__unclassified_f__Lachnospiraceae	ASV3095	0	0	0	0	0	0	3	0	0	0	0	0	0	0	0	0	0	0	0	0	0	0	0	0
d__Bacteria	k__norank_d__Bacteria	p__unclassified_k__norank_d__Bacteria	c__unclassified_k__norank_d__Bacteria	o__unclassified_k__norank_d__Bacteria	f__unclassified_k__norank_d__Bacteria	g__unclassified_k__norank_d__Bacteria	s__unclassified_k__norank_d__Bacteria	ASV3078	0	0	0	0	0	0	19	0	0	0	0	0	0	0	0	0	0	0	0	0	0	0	0	0
d__Bacteria	k__norank_d__Bacteria	p__Bacteroidota	c__Bacteroidia	o__Bacteroidales	f__Muribaculaceae	g__norank_f__Muribaculaceae	s__unclassified_g__norank_f__Muribaculaceae	ASV2082	0	0	0	0	0	0	0	0	0	14	0	46	0	0	0	0	29	0	0	0	0	0	0	0
d__Bacteria	k__norank_d__Bacteria	p__Firmicutes	c__Clostridia	o__Oscillospirales	f__Oscillospiraceae	g__Oscillibacter	s__unclassified_g__Oscillibacter	ASV767	0	0	38	42	0	32	0	0	39	0	0	0	11	0	0	0	0	89	0	0	31	32	0	14
d__Bacteria	k__norank_d__Bacteria	p__Firmicutes	c__Clostridia	o__Lachnospirales	f__Lachnospiraceae	g__Eubacterium_xylanophilum_group	s__uncultured_bacterium_g__Eubacterium_xylanophilum_group	ASV1535	0	0	0	0	0	0	0	0	0	0	0	0	0	0	0	0	8	0	18	26	0	0	0	0
d__Bacteria	k__norank_d__Bacteria	p__Firmicutes	c__Clostridia	o__Lachnospirales	f__Lachnospiraceae	g__Eubacterium_xylanophilum_group	s__uncultured_bacterium_g__Eubacterium_xylanophilum_group	ASV3006	0	0	0	0	0	0	0	0	0	0	0	21	0	0	0	0	0	0	0	0	0	0	0	0
d__Bacteria	k__norank_d__Bacteria	p__Firmicutes	c__Bacilli	o__RF39	f__norank_o__RF39	g__norank_f__norank_o__RF39	s__uncultured_bacterium_g__norank_f__norank_o__RF39	ASV1115	0	0	0	0	0	0	0	0	0	0	0	4	0	0	0	0	0	0	0	0	0	0	0	0
d__Bacteria	k__norank_d__Bacteria	p__Firmicutes	c__Clostridia	o__Christensenellales	f__Christensenellaceae	g__Christensenellaceae_R-7_group	s__unclassified_g__Christensenellaceae_R-7_group	ASV3016	0	0	0	0	0	0	0	0	0	0	0	8	0	0	0	0	0	0	0	0	0	0	0	0
d__Bacteria	k__norank_d__Bacteria	p__Firmicutes	c__Clostridia	o__Lachnospirales	f__Lachnospiraceae	g__Eubacterium_ruminantium_group	s__uncultured_bacterium_g__Eubacterium_ruminantium_group	ASV90	0	0	0	57	0	59	107	0	0	0	0	0	0	0	0	0	23	0	0	0	0	0	0	0
d__Bacteria	k__norank_d__Bacteria	p__Firmicutes	c__Clostridia	o__Lachnospirales	f__Lachnospiraceae	g__unclassified_f__Lachnospiraceae	s__unclassified_f__Lachnospiraceae	ASV2923	0	0	0	0	0	0	0	0	0	0	0	0	5	0	0	0	0	0	0	0	0	0	0	0
d__Bacteria	k__norank_d__Bacteria	p__Firmicutes	c__Clostridia	o__Lachnospirales	f__Lachnospiraceae	g__unclassified_f__Lachnospiraceae	s__unclassified_f__Lachnospiraceae	ASV2922	0	0	0	0	0	0	0	0	0	0	0	0	5	0	0	0	0	0	0	0	0	0	0	0
d__Bacteria	k__norank_d__Bacteria	p__Firmicutes	c__Clostridia	o__Lachnospirales	f__Lachnospiraceae	g__unclassified_f__Lachnospiraceae	s__unclassified_f__Lachnospiraceae	ASV2926	0	0	0	0	0	0	0	0	0	0	0	0	4	0	0	0	0	0	0	0	0	0	0	0
d__Bacteria	k__norank_d__Bacteria	p__Bacteroidota	c__Bacteroidia	o__Bacteroidales	f__Muribaculaceae	g__norank_f__Muribaculaceae	s__uncultured_bacterium_g__norank_f__Muribaculaceae	ASV2307	0	0	21	0	0	0	0	0	0	0	0	0	0	0	0	0	0	0	0	0	0	0	0	0
d__Bacteria	k__norank_d__Bacteria	p__Firmicutes	c__Bacilli	o__Lactobacillales	f__Lactobacillaceae	g__Lactobacillus	s__unclassified_g__Lactobacillus	ASV3010	0	0	0	0	0	0	0	0	0	0	0	17	0	0	0	0	0	0	0	0	0	0	0	0
d__Bacteria	k__norank_d__Bacteria	p__Firmicutes	c__Clostridia	o__Lachnospirales	f__Lachnospiraceae	g__Lachnospiraceae_NK3A20_group	s__uncultured_bacterium_g__Lachnospiraceae_NK3A20_group	ASV1193	0	0	0	0	16	0	6	6	6	0	0	0	0	0	0	0	10	0	0	0	0	0	0	0
d__Bacteria	k__norank_d__Bacteria	p__Firmicutes	c__Clostridia	o__Oscillospirales	f__Oscillospiraceae	g__unclassified_f__Oscillospiraceae	s__unclassified_f__Oscillospiraceae	ASV2932	0	0	0	0	0	0	0	0	0	0	0	0	2	0	0	0	0	0	0	0	0	0	0	0
d__Bacteria	k__norank_d__Bacteria	p__Bacteroidota	c__Bacteroidia	o__Bacteroidales	f__Prevotellaceae	g__Prevotellaceae_UCG-001	s__unclassified_g__Prevotellaceae_UCG-001	ASV2704	0	0	0	0	0	0	0	10	0	0	0	0	0	0	22	34	0	0	0	0	0	0	0	0
d__Bacteria	k__norank_d__Bacteria	p__Actinobacteriota	c__Coriobacteriia	o__Coriobacteriales	f__Eggerthellaceae	g__Enterorhabdus	s__uncultured_bacterium_g__Enterorhabdus	ASV2348	0	0	6	0	0	0	0	0	0	0	0	0	0	0	0	0	0	0	0	0	0	0	0	0
d__Bacteria	k__norank_d__Bacteria	p__Firmicutes	c__Clostridia	o__Oscillospirales	f__Oscillospiraceae	g__NK4A214_group	s__unclassified_g__NK4A214_group	ASV2414	0	0	0	0	0	0	0	0	4	0	0	0	0	0	0	0	0	0	0	0	0	0	0	0
d__Bacteria	k__norank_d__Bacteria	p__Firmicutes	c__Clostridia	o__Lachnospirales	f__Lachnospiraceae	g__unclassified_f__Lachnospiraceae	s__unclassified_f__Lachnospiraceae	ASV1591	0	0	0	0	0	0	0	0	0	0	0	0	0	0	0	0	0	0	3	0	0	0	0	0
d__Bacteria	k__norank_d__Bacteria	p__Proteobacteria	c__Alphaproteobacteria	o__Rickettsiales	f__norank_o__Rickettsiales	g__norank_f__norank_o__Rickettsiales	s__uncultured_Alphaproteobacteria_bacterium_g__norank_f__norank	ASV1875	0	0	0	0	0	12	0	0	0	0	0	0	0	3	0	16	0	0	0	0	0	8	19	0
d__Bacteria	k__norank_d__Bacteria	p__Firmicutes	c__Clostridia	o__Clostridia_UCG-014	f__norank_o__Clostridia_UCG-014	g__norank_f__norank_o__Clostridia_UCG-014	s__unclassified_g__norank_f__norank_o__Clostridia_UCG-014	ASV1182	0	0	0	0	19	0	0	0	0	0	0	0	0	0	0	0	0	0	13	0	0	0	0	0
d__Bacteria	k__norank_d__Bacteria	p__Firmicutes	c__Bacilli	o__Erysipelotrichales	f__Erysipelotrichaceae	g__norank_f__Erysipelotrichaceae	s__uncultured_Allobaculum_sp._g__norank	ASV2249	0	0	0	0	0	0	0	0	0	0	0	0	0	39	0	0	0	0	0	0	0	0	0	0
d__Bacteria	k__norank_d__Bacteria	p__Firmicutes	c__Bacilli	o__Erysipelotrichales	f__Erysipelotrichaceae	g__norank_f__Erysipelotrichaceae	s__uncultured_Allobaculum_sp._g__norank	ASV1827	0	0	0	25	0	0	0	0	0	0	0	51	0	0	0	17	0	0	0	0	17	34	0	0
d__Bacteria	k__norank_d__Bacteria	p__Firmicutes	c__Clostridia	o__Lachnospirales	f__Lachnospiraceae	g__unclassified_f__Lachnospiraceae	s__unclassified_f__Lachnospiraceae	ASV490	0	0	0	0	0	0	0	0	0	0	8	0	0	0	0	26	13	0	0	0	0	0	0	0
d__Bacteria	k__norank_d__Bacteria	p__Firmicutes	c__Bacilli	o__Erysipelotrichales	f__Erysipelotrichaceae	g__norank_f__Erysipelotrichaceae	s__uncultured_Allobaculum_sp._g__norank	ASV1539	0	0	0	0	0	0	0	0	29	0	0	57	0	58	0	47	0	0	14	0	19	72	0	0
d__Bacteria	k__norank_d__Bacteria	p__Bacteroidota	c__Bacteroidia	o__Bacteroidales	f__Muribaculaceae	g__norank_f__Muribaculaceae	s__uncultured_bacterium_g__norank_f__Muribaculaceae	ASV1305	0	0	0	0	0	0	7	0	0	0	0	0	0	0	0	0	0	0	0	0	0	0	0	0
d__Bacteria	k__norank_d__Bacteria	p__Firmicutes	c__Clostridia	o__Oscillospirales	f__Oscillospiraceae	g__unclassified_f__Oscillospiraceae	s__unclassified_f__Oscillospiraceae	ASV2848	0	0	0	0	0	0	0	0	0	0	0	0	0	0	1	0	0	0	0	0	0	0	0	0
d__Bacteria	k__norank_d__Bacteria	p__Bacteroidota	c__Bacteroidia	o__Bacteroidales	f__Muribaculaceae	g__norank_f__Muribaculaceae	s__unclassified_g__norank_f__Muribaculaceae	ASV1512	0	0	0	0	0	0	0	0	0	0	0	0	0	0	0	0	0	0	20	41	0	0	31	0
d__Bacteria	k__norank_d__Bacteria	p__Patescibacteria	c__Saccharimonadia	o__Saccharimonadales	f__Saccharimonadaceae	g__Candidatus_Saccharimonas	s__uncultured_bacterium_g__Candidatus_Saccharimonas	ASV500	52	0	0	23	0	46	0	0	33	0	0	0	0	0	34	20	0	0	0	0	0	0	0	0
d__Bacteria	k__norank_d__Bacteria	p__Firmicutes	c__Clostridia	o__Oscillospirales	f__Ruminococcaceae	g__norank_f__Ruminococcaceae	s__Clostridium_leptum_g__norank	ASV574	3	5	11	0	7	18	17	0	19	0	0	0	0	0	7	0	6	16	26	7	0	10	9	0
d__Bacteria	k__norank_d__Bacteria	p__Firmicutes	c__Clostridia	o__Clostridia_UCG-014	f__norank_o__Clostridia_UCG-014	g__norank_f__norank_o__Clostridia_UCG-014	s__unclassified_g__norank_f__norank_o__Clostridia_UCG-014	ASV1480	6	0	0	0	0	128	0	0	0	0	50	0	0	0	0	40	0	0	40	0	0	41	0	0
d__Bacteria	k__norank_d__Bacteria	p__Firmicutes	c__Clostridia	o__Oscillospirales	f__Oscillospiraceae	g__norank_f__Oscillospiraceae	s__uncultured_bacterium_g__norank_f__Oscillospiraceae	ASV1510	0	0	11	0	0	0	28	15	28	0	0	0	0	0	0	0	0	0	25	0	15	24	0	0
d__Bacteria	k__norank_d__Bacteria	p__Actinobacteriota	c__Actinobacteria	o__Bifidobacteriales	f__Bifidobacteriaceae	g__Aeriscardovia	s__unclassified_g__Aeriscardovia	ASV2765	0	0	0	0	0	0	0	17	0	0	0	0	0	0	0	0	0	0	0	0	0	0	0	0
d__Bacteria	k__norank_d__Bacteria	p__Firmicutes	c__Clostridia	o__Lachnospirales	f__Lachnospiraceae	g__Lachnospiraceae_NK4A136_group	s__unclassified_g__Lachnospiraceae_NK4A136_group	ASV1916	0	0	243	244	0	0	0	0	0	0	0	0	0	0	0	0	0	0	0	16	0	0	0	0
d__Bacteria	k__norank_d__Bacteria	p__Firmicutes	c__Clostridia	o__Lachnospirales	f__Lachnospiraceae	g__Lachnospiraceae_NK4A136_group	s__unclassified_g__Lachnospiraceae_NK4A136_group	ASV1262	100	0	34	195	0	0	0	26	0	0	0	0	0	0	0	0	0	0	18	0	55	0	0	0
d__Bacteria	k__norank_d__Bacteria	p__Bacteroidota	c__Bacteroidia	o__Bacteroidales	f__Muribaculaceae	g__norank_f__Muribaculaceae	s__uncultured_bacterium_g__norank_f__Muribaculaceae	ASV2769	0	0	0	0	0	0	0	13	0	0	0	0	0	0	0	0	0	0	0	0	0	0	0	0
d__Bacteria	k__norank_d__Bacteria	p__Proteobacteria	c__Alphaproteobacteria	o__Rhodospirillales	f__norank_o__Rhodospirillales	g__norank_f__norank_o__Rhodospirillales	s__gut_metagenome_g__norank	ASV3066	3	0	0	0	0	0	0	0	0	0	0	0	0	0	0	0	0	0	0	0	0	0	0	0
d__Bacteria	k__norank_d__Bacteria	p__Firmicutes	c__Clostridia	o__Oscillospirales	f__Eubacterium_coprostanoligenes_group	g__norank_f__Eubacterium_coprostanoligenes_group	s__uncultured_bacterium_g__norank_f__Eubacterium_coprostanoligenes_group	ASV2705	0	0	0	0	0	0	0	0	0	0	0	0	0	0	0	28	0	0	0	0	0	0	0	0
d__Bacteria	k__norank_d__Bacteria	p__Firmicutes	c__Clostridia	o__Lachnospirales	f__Lachnospiraceae	g__unclassified_f__Lachnospiraceae	s__unclassified_f__Lachnospiraceae	ASV1647	0	124	0	159	0	0	158	0	0	0	90	0	0	156	229	0	0	225	0	0	136	0	200	0
d__Bacteria	k__norank_d__Bacteria	p__Firmicutes	c__Clostridia	o__Clostridia_UCG-014	f__norank_o__Clostridia_UCG-014	g__norank_f__norank_o__Clostridia_UCG-014	s__unclassified_g__norank_f__norank_o__Clostridia_UCG-014	ASV451	14	0	0	0	0	0	0	0	0	0	76	35	0	0	0	66	0	101	0	0	15	0	0	0
d__Bacteria	k__norank_d__Bacteria	p__Firmicutes	c__Clostridia	o__Oscillospirales	f__UCG-010	g__norank_f__UCG-010	s__uncultured_bacterium_g__norank_f__UCG-010	ASV2426	0	0	0	0	0	0	0	0	3	0	0	0	0	0	0	0	0	0	0	0	0	0	3	0
d__Bacteria	k__norank_d__Bacteria	p__Bacteroidota	c__Bacteroidia	o__Bacteroidales	f__Muribaculaceae	g__norank_f__Muribaculaceae	s__uncultured_bacterium_g__norank_f__Muribaculaceae	ASV815	0	0	0	0	0	0	0	0	0	10	0	0	0	0	0	0	7	0	0	22	26	0	21	7
d__Bacteria	k__norank_d__Bacteria	p__Bacteroidota	c__Bacteroidia	o__Bacteroidales	f__Muribaculaceae	g__norank_f__Muribaculaceae	s__uncultured_bacterium_g__norank_f__Muribaculaceae	ASV817	0	0	0	0	0	0	0	0	0	0	0	0	0	0	0	0	0	0	0	0	0	0	0	13
d__Bacteria	k__norank_d__Bacteria	p__Firmicutes	c__Clostridia	o__Clostridia_UCG-014	f__norank_o__Clostridia_UCG-014	g__norank_f__norank_o__Clostridia_UCG-014	s__unclassified_g__norank_f__norank_o__Clostridia_UCG-014	ASV459	33	0	0	0	0	0	0	0	0	0	0	0	0	0	0	8	0	0	0	0	0	0	0	0
d__Bacteria	k__norank_d__Bacteria	p__Bacteroidota	c__Bacteroidia	o__Bacteroidales	f__Muribaculaceae	g__norank_f__Muribaculaceae	s__uncultured_bacterium_g__norank_f__Muribaculaceae	ASV812	21	15	0	0	52	0	54	0	13	0	40	16	10	0	41	0	33	0	0	0	0	7	9	10
d__Bacteria	k__norank_d__Bacteria	p__Actinobacteriota	c__Coriobacteriia	o__Coriobacteriales	f__Eggerthellaceae	g__Enterorhabdus	s__uncultured_bacterium_g__Enterorhabdus	ASV1901	0	0	0	0	0	0	0	0	0	0	0	0	0	0	4	0	0	0	0	0	0	5	0	0
d__Bacteria	k__norank_d__Bacteria	p__Firmicutes	c__Clostridia	o__Monoglobales	f__Monoglobaceae	g__Monoglobus	s__unclassified_g__Monoglobus	ASV2972	0	0	0	0	0	0	16	0	0	0	0	0	0	0	0	0	24	0	0	0	0	0	0	0
d__Bacteria	k__norank_d__Bacteria	p__Firmicutes	c__Clostridia	o__Clostridia_vadinBB60_group	f__norank_o__Clostridia_vadinBB60_group	g__norank_f__norank_o__Clostridia_vadinBB60_group	s__unclassified_g__norank_f__norank_o__Clostridia_vadinBB60_group	ASV1893	0	0	0	0	0	0	0	0	0	0	0	0	0	0	0	0	0	0	0	0	0	7	0	0
d__Bacteria	k__norank_d__Bacteria	p__Firmicutes	c__Bacilli	o__Erysipelotrichales	f__Erysipelotrichaceae	g__Turicibacter	s__uncultured_bacterium_g__Turicibacter	ASV382	0	0	0	0	0	0	0	0	0	0	22	0	0	0	0	0	0	0	0	0	0	0	0	0
d__Bacteria	k__norank_d__Bacteria	p__Firmicutes	c__Clostridia	o__Lachnospirales	f__Lachnospiraceae	g__Roseburia	s__unclassified_g__Roseburia	ASV2364	0	0	0	0	0	0	0	0	41	0	0	0	0	0	0	0	0	0	0	0	0	0	0	0
d__Bacteria	k__norank_d__Bacteria	p__Firmicutes	c__Clostridia	o__Lachnospirales	f__Lachnospiraceae	g__Lachnospiraceae_UCG-001	s__uncultured_bacterium_g__Lachnospiraceae_UCG-001	ASV2778	0	14	0	0	0	0	0	8	0	0	0	0	0	0	0	0	0	0	0	0	0	0	0	0
d__Bacteria	k__norank_d__Bacteria	p__Firmicutes	c__Bacilli	o__Lactobacillales	f__Lactobacillaceae	g__Lactobacillus	s__unclassified_g__Lactobacillus	ASV1837	0	0	0	0	0	0	0	0	71	0	0	0	0	0	74	0	0	0	0	0	66	30	0	0
d__Bacteria	k__norank_d__Bacteria	p__Firmicutes	c__Clostridia	o__Clostridia_UCG-014	f__norank_o__Clostridia_UCG-014	g__norank_f__norank_o__Clostridia_UCG-014	s__uncultured_bacterium_g__norank_f__norank_o__Clostridia_UCG-014	ASV2540	0	0	0	0	0	8	0	0	0	0	0	0	0	0	0	0	0	0	0	0	0	0	0	0
d__Bacteria	k__norank_d__Bacteria	p__Firmicutes	c__Clostridia	o__Lachnospirales	f__Lachnospiraceae	g__Roseburia	s__unclassified_g__Roseburia	ASV1547	0	0	12	0	0	0	0	0	0	0	0	0	0	0	0	0	0	14	12	0	0	0	0	0
d__Bacteria	k__norank_d__Bacteria	p__Bacteroidota	c__Bacteroidia	o__Bacteroidales	f__Prevotellaceae	g__unclassified_f__Prevotellaceae	s__unclassified_f__Prevotellaceae	ASV1813	200	0	0	0	0	39	0	0	15	0	0	0	0	162	0	7	0	2	0	40	0	56	0	0
d__Bacteria	k__norank_d__Bacteria	p__Firmicutes	c__Clostridia	o__Oscillospirales	f__Oscillospiraceae	g__unclassified_f__Oscillospiraceae	s__unclassified_f__Oscillospiraceae	ASV2323	0	0	9	0	0	0	0	18	0	0	0	0	0	0	0	0	0	23	0	0	0	0	0	0
d__Bacteria	k__norank_d__Bacteria	p__Firmicutes	c__Bacilli	o__Bacillales	f__Bacillaceae	g__Bacillus	s__Lactobacillus_vaginalis_g__Bacillus	ASV713	0	0	0	0	0	0	0	0	0	0	82	0	0	56	0	0	0	10	27	25	21	0	0	22
d__Bacteria	k__norank_d__Bacteria	p__Firmicutes	c__Clostridia	o__Lachnospirales	f__Lachnospiraceae	g__unclassified_f__Lachnospiraceae	s__unclassified_f__Lachnospiraceae	ASV2328	0	13	11	0	0	0	0	9	0	0	0	0	0	0	0	5	0	0	0	0	0	0	0	0
d__Bacteria	k__norank_d__Bacteria	p__Firmicutes	c__Clostridia	o__Clostridia_vadinBB60_group	f__norank_o__Clostridia_vadinBB60_group	g__norank_f__norank_o__Clostridia_vadinBB60_group	s__unclassified_g__norank_f__norank_o__Clostridia_vadinBB60_group	ASV2846	0	0	0	0	0	0	0	0	0	0	0	0	0	0	3	0	0	0	0	0	0	0	0	0
d__Bacteria	k__norank_d__Bacteria	p__Bacteroidota	c__Bacteroidia	o__Bacteroidales	f__Muribaculaceae	g__norank_f__Muribaculaceae	s__uncultured_bacterium_g__norank_f__Muribaculaceae	ASV2549	0	0	0	0	0	7	0	0	0	0	0	0	0	0	0	0	0	0	0	0	0	0	0	0
d__Bacteria	k__norank_d__Bacteria	p__Bacteroidota	c__Bacteroidia	o__Bacteroidales	f__Muribaculaceae	g__norank_f__Muribaculaceae	s__uncultured_bacterium_g__norank_f__Muribaculaceae	ASV736	0	14	0	5	18	0	15	0	40	13	0	0	0	2	14	29	0	10	0	10	0	6	15	20
d__Bacteria	k__norank_d__Bacteria	p__Bacteroidota	c__Bacteroidia	o__Bacteroidales	f__Muribaculaceae	g__norank_f__Muribaculaceae	s__uncultured_bacterium_g__norank_f__Muribaculaceae	ASV3015	0	0	0	0	0	0	0	0	0	0	0	11	0	0	0	0	0	0	0	0	0	0	0	0
d__Bacteria	k__norank_d__Bacteria	p__Firmicutes	c__Clostridia	o__Lachnospirales	f__Lachnospiraceae	g__unclassified_f__Lachnospiraceae	s__unclassified_f__Lachnospiraceae	ASV2324	0	0	8	0	0	0	0	0	0	0	0	0	0	0	0	0	0	0	0	0	0	0	0	0
d__Bacteria	k__norank_d__Bacteria	p__Bacteroidota	c__Bacteroidia	o__Bacteroidales	f__Muribaculaceae	g__norank_f__Muribaculaceae	s__uncultured_bacterium_g__norank_f__Muribaculaceae	ASV733	0	43	0	0	0	53	0	22	0	0	0	0	0	0	0	0	0	0	0	0	0	0	0	22
d__Bacteria	k__norank_d__Bacteria	p__Firmicutes	c__Clostridia	o__Lachnospirales	f__Lachnospiraceae	g__unclassified_f__Lachnospiraceae	s__unclassified_f__Lachnospiraceae	ASV1538	0	0	0	0	0	0	0	0	0	0	9	0	0	16	0	44	0	0	16	0	0	0	0	0
d__Bacteria	k__norank_d__Bacteria	p__Firmicutes	c__Clostridia	o__Lachnospirales	f__Lachnospiraceae	g__unclassified_f__Lachnospiraceae	s__unclassified_f__Lachnospiraceae	ASV1537	0	8	0	0	0	0	0	0	0	0	12	0	0	0	0	0	0	32	17	0	0	0	0	0
d__Bacteria	k__norank_d__Bacteria	p__Firmicutes	c__Clostridia	o__Lachnospirales	f__Lachnospiraceae	g__unclassified_f__Lachnospiraceae	s__unclassified_f__Lachnospiraceae	ASV1533	0	0	0	0	0	0	0	0	0	0	0	0	0	0	0	0	0	0	15	0	0	0	0	0
d__Bacteria	k__norank_d__Bacteria	p__Bacteroidota	c__Bacteroidia	o__Bacteroidales	f__Muribaculaceae	g__Muribaculum	s__unclassified_g__Muribaculum	ASV2711	0	0	0	0	0	0	0	0	0	0	0	16	0	0	0	29	4	19	0	0	0	0	0	0
d__Bacteria	k__norank_d__Bacteria	p__Bacteroidota	c__Bacteroidia	o__Bacteroidales	f__Muribaculaceae	g__norank_f__Muribaculaceae	s__unclassified_g__norank_f__Muribaculaceae	ASV2258	0	0	0	0	0	0	0	0	0	0	0	0	0	22	0	0	0	0	0	0	0	0	0	0
d__Bacteria	k__norank_d__Bacteria	p__Firmicutes	c__Clostridia	o__Lachnospirales	f__Lachnospiraceae	g__Lachnospiraceae_UCG-001	s__unclassified_g__Lachnospiraceae_UCG-001	ASV1389	0	0	131	56	0	0	0	15	0	0	0	0	0	0	0	0	0	0	0	0	16	0	89	0
d__Bacteria	k__norank_d__Bacteria	p__Desulfobacterota	c__Desulfovibrionia	o__Desulfovibrionales	f__Desulfovibrionaceae	g__Desulfovibrio	s__uncultured_bacterium_g__Desulfovibrio	ASV853	0	0	35	78	14	10	25	0	0	0	0	0	12	0	0	0	33	0	0	0	0	7	0	9
d__Bacteria	k__norank_d__Bacteria	p__Bacteroidota	c__Bacteroidia	o__Bacteroidales	f__Marinifilaceae	g__Odoribacter	s__uncultured_bacterium_g__Odoribacter	ASV1226	2	0	2	3	1	0	5	0	0	0	0	0	0	0	0	0	6	0	0	0	3	0	0	0
d__Bacteria	k__norank_d__Bacteria	p__Bacteroidota	c__Bacteroidia	o__Bacteroidales	f__Muribaculaceae	g__norank_f__Muribaculaceae	s__unclassified_g__norank_f__Muribaculaceae	ASV627	80	128	0	25	90	65	39	99	74	118	78	95	0	65	25	174	32	36	40	65	69	42	119	76
d__Bacteria	k__norank_d__Bacteria	p__Firmicutes	c__Clostridia	o__Oscillospirales	f__Oscillospiraceae	g__Colidextribacter	s__unclassified_g__Colidextribacter	ASV2338	0	9	6	0	0	0	0	0	0	0	0	0	0	0	0	0	0	0	0	0	0	0	0	0
d__Bacteria	k__norank_d__Bacteria	p__Firmicutes	c__Clostridia	o__Peptococcales	f__Peptococcaceae	g__Peptococcus	s__uncultured_bacterium_g__Peptococcus	ASV756	7	0	31	24	0	30	25	36	0	0	0	0	16	0	0	0	31	0	0	0	15	0	0	16
d__Bacteria	k__norank_d__Bacteria	p__Bacteroidota	c__Bacteroidia	o__Bacteroidales	f__Muribaculaceae	g__norank_f__Muribaculaceae	s__uncultured_bacterium_g__norank_f__Muribaculaceae	ASV1941	0	0	0	30	0	0	0	25	0	29	0	23	0	57	26	0	42	40	0	35	0	0	0	0
d__Bacteria	k__norank_d__Bacteria	p__Bacteroidota	c__Bacteroidia	o__Bacteroidales	f__Muribaculaceae	g__norank_f__Muribaculaceae	s__uncultured_bacterium_g__norank_f__Muribaculaceae	ASV1940	0	0	0	24	0	17	0	0	0	0	79	0	0	0	0	0	0	47	0	29	41	0	0	0
d__Bacteria	k__norank_d__Bacteria	p__Firmicutes	c__Clostridia	o__Oscillospirales	f__UCG-010	g__norank_f__UCG-010	s__unclassified_g__norank_f__UCG-010	ASV2686	0	0	0	0	0	0	0	0	0	0	0	0	0	0	0	2	0	6	0	0	6	0	0	0
d__Bacteria	k__norank_d__Bacteria	p__Firmicutes	c__Clostridia	o__Lachnospirales	f__Lachnospiraceae	g__unclassified_f__Lachnospiraceae	s__unclassified_f__Lachnospiraceae	ASV1224	0	0	0	0	5	0	0	0	0	0	0	0	0	0	0	9	18	0	0	0	0	0	0	0
d__Bacteria	k__norank_d__Bacteria	p__Firmicutes	c__Clostridia	o__Lachnospirales	f__Lachnospiraceae	g__unclassified_f__Lachnospiraceae	s__unclassified_f__Lachnospiraceae	ASV1227	0	0	0	0	3	0	33	0	16	0	0	22	0	0	0	0	0	0	0	0	0	0	0	0
d__Bacteria	k__norank_d__Bacteria	p__Bacteroidota	c__Bacteroidia	o__Bacteroidales	f__Muribaculaceae	g__norank_f__Muribaculaceae	s__uncultured_bacterium_g__norank_f__Muribaculaceae	ASV1949	0	0	15	20	0	0	0	0	0	0	0	0	0	0	0	7	3	0	0	0	30	0	0	0
d__Bacteria	k__norank_d__Bacteria	p__Spirochaetota	c__Spirochaetia	o__Spirochaetales	f__Spirochaetaceae	g__Sphaerochaeta	s__uncultured_bacterium_g__Sphaerochaeta	ASV367	0	0	2	0	0	1	0	0	0	0	0	0	0	0	0	2	0	0	0	0	0	0	0	0
d__Bacteria	k__norank_d__Bacteria	p__Firmicutes	c__Clostridia	o__Peptostreptococcales-Tissierellales	f__Anaerovoracaceae	g__Family_XIII_AD3011_group	s__uncultured_bacterium_g__Family_XIII_AD3011_group	ASV309	2	0	9	0	0	5	0	0	0	0	0	10	2	0	7	0	2	3	0	2	0	0	3	0
d__Bacteria	k__norank_d__Bacteria	p__Firmicutes	c__Clostridia	o__Oscillospirales	f__Oscillospiraceae	g__unclassified_f__Oscillospiraceae	s__unclassified_f__Oscillospiraceae	ASV2454	0	0	0	0	0	0	0	0	0	0	23	0	0	0	0	0	0	0	0	0	0	0	0	0
d__Bacteria	k__norank_d__Bacteria	p__Firmicutes	c__Bacilli	o__Erysipelotrichales	f__Erysipelotrichaceae	g__norank_f__Erysipelotrichaceae	s__uncultured_Allobaculum_sp._g__norank	ASV1835	0	0	0	27	0	0	0	0	35	0	0	63	0	0	0	11	0	17	0	0	21	31	0	0
d__Bacteria	k__norank_d__Bacteria	p__Firmicutes	c__Clostridia	o__Oscillospirales	f__Oscillospiraceae	g__unclassified_f__Oscillospiraceae	s__unclassified_f__Oscillospiraceae	ASV2853	0	0	0	0	0	0	0	0	0	0	0	0	0	0	0	0	0	29	0	0	0	0	0	0
d__Bacteria	k__norank_d__Bacteria	p__Firmicutes	c__Clostridia	o__Clostridia_vadinBB60_group	f__norank_o__Clostridia_vadinBB60_group	g__norank_f__norank_o__Clostridia_vadinBB60_group	s__unclassified_g__norank_f__norank_o__Clostridia_vadinBB60_group	ASV2023	0	0	0	2	0	0	0	0	0	0	0	0	0	0	0	0	0	5	0	0	0	0	0	0
d__Bacteria	k__norank_d__Bacteria	p__Bacteroidota	c__Bacteroidia	o__Bacteroidales	f__Prevotellaceae	g__Prevotellaceae_UCG-001	s__unclassified_g__Prevotellaceae_UCG-001	ASV2400	0	0	0	0	0	0	0	0	8	0	0	0	0	0	0	8	0	0	0	0	0	0	0	0
d__Bacteria	k__norank_d__Bacteria	p__Firmicutes	c__Clostridia	o__Clostridia_UCG-014	f__norank_o__Clostridia_UCG-014	g__norank_f__norank_o__Clostridia_UCG-014	s__unidentified_rumen_bacterium_JW32	ASV2227	0	0	0	0	0	0	0	0	0	0	0	0	0	0	0	0	0	0	0	6	0	0	0	0
d__Bacteria	k__norank_d__Bacteria	p__Firmicutes	c__Clostridia	o__Oscillospirales	f__Ruminococcaceae	g__Eubacterium_siraeum_group	s__uncultured_bacterium_g__Eubacterium_siraeum_group	ASV1866	0	0	0	6	0	25	0	0	0	0	0	0	0	0	0	0	0	0	0	0	0	14	0	0
d__Bacteria	k__norank_d__Bacteria	p__Bacteroidota	c__Bacteroidia	o__Bacteroidales	f__Muribaculaceae	g__norank_f__Muribaculaceae	s__unclassified_g__norank_f__Muribaculaceae	ASV2068	17	0	0	0	0	0	16	15	0	18	21	0	0	0	0	0	0	0	0	0	0	0	0	0
d__Bacteria	k__norank_d__Bacteria	p__Firmicutes	c__unclassified_p__Firmicutes	o__unclassified_p__Firmicutes	f__unclassified_p__Firmicutes	g__unclassified_p__Firmicutes	s__unclassified_p__Firmicutes	ASV2509	0	0	0	0	0	0	0	0	0	0	2	0	0	0	0	0	0	0	0	0	0	0	0	0
d__Bacteria	k__norank_d__Bacteria	p__Firmicutes	c__Clostridia	o__Oscillospirales	f__Oscillospiraceae	g__norank_f__Oscillospiraceae	s__unclassified_g__norank_f__Oscillospiraceae	ASV1496	0	0	0	0	0	0	0	0	0	0	0	0	0	0	0	0	33	0	28	0	46	0	0	0
d__Bacteria	k__norank_d__Bacteria	p__Bacteroidota	c__Bacteroidia	o__Bacteroidales	f__Muribaculaceae	g__norank_f__Muribaculaceae	s__uncultured_bacterium_g__norank_f__Muribaculaceae	ASV256	19	6	0	0	56	26	157	0	45	13	162	0	23	0	45	96	110	252	0	417	109	133	0	8
d__Bacteria	k__norank_d__Bacteria	p__Proteobacteria	c__Alphaproteobacteria	o__Rhodospirillales	f__norank_o__Rhodospirillales	g__norank_f__norank_o__Rhodospirillales	s__unclassified_g__norank_f__norank_o__Rhodospirillales	ASV2689	0	1	0	0	0	0	0	0	0	0	0	0	0	0	2	0	0	0	0	0	5	0	0	0
d__Bacteria	k__norank_d__Bacteria	p__Bacteroidota	c__Bacteroidia	o__Bacteroidales	f__Muribaculaceae	g__norank_f__Muribaculaceae	s__uncultured_bacterium_g__norank_f__Muribaculaceae	ASV253	18	21	0	12	0	0	11	14	0	0	0	323	0	0	9	0	7	0	0	0	6	0	0	0
d__Bacteria	k__norank_d__Bacteria	p__Firmicutes	c__Clostridia	o__Oscillospirales	f__Oscillospiraceae	g__norank_f__Oscillospiraceae	s__unclassified_g__norank_f__Oscillospiraceae	ASV1493	0	0	0	0	0	0	0	0	0	0	0	0	0	0	0	0	0	0	24	11	0	0	0	0
d__Bacteria	k__norank_d__Bacteria	p__Firmicutes	c__Clostridia	o__Lachnospirales	f__Lachnospiraceae	g__unclassified_f__Lachnospiraceae	s__unclassified_f__Lachnospiraceae	ASV779	15	0	21	32	12	0	41	34	0	0	0	0	41	0	0	0	0	0	0	9	0	0	19	13
d__Bacteria	k__norank_d__Bacteria	p__Firmicutes	c__Clostridia	o__Lachnospirales	f__Lachnospiraceae	g__unclassified_f__Lachnospiraceae	s__unclassified_f__Lachnospiraceae	ASV776	0	0	0	32	0	0	15	9	0	0	0	0	7	11	9	0	21	0	0	0	0	17	16	17
d__Bacteria	k__norank_d__Bacteria	p__Firmicutes	c__Clostridia	o__Lachnospirales	f__Lachnospiraceae	g__unclassified_f__Lachnospiraceae	s__unclassified_f__Lachnospiraceae	ASV775	0	0	0	3	0	0	0	0	0	21	0	0	0	0	0	0	0	0	0	0	0	0	0	16
d__Bacteria	k__norank_d__Bacteria	p__Firmicutes	c__Clostridia	o__Lachnospirales	f__Lachnospiraceae	g__unclassified_f__Lachnospiraceae	s__unclassified_f__Lachnospiraceae	ASV771	10	0	17	0	0	28	37	24	37	16	0	0	26	0	0	0	0	14	8	24	0	0	0	14
d__Bacteria	k__norank_d__Bacteria	p__Firmicutes	c__Clostridia	o__Oscillospirales	f__Ruminococcaceae	g__Eubacterium_siraeum_group	s__unclassified_g__Eubacterium_siraeum_group	ASV2665	0	0	0	0	0	0	0	0	0	0	0	0	0	0	0	0	0	97	0	0	38	0	0	0
d__Bacteria	k__norank_d__Bacteria	p__Firmicutes	c__Clostridia	o__Lachnospirales	f__Lachnospiraceae	g__unclassified_f__Lachnospiraceae	s__unclassified_f__Lachnospiraceae	ASV1503	0	0	0	0	0	0	0	0	0	0	0	0	0	0	0	0	0	0	30	0	0	0	0	0
d__Bacteria	k__norank_d__Bacteria	p__Bacteroidota	c__Bacteroidia	o__Bacteroidales	f__Muribaculaceae	g__norank_f__Muribaculaceae	s__uncultured_bacterium_g__norank_f__Muribaculaceae	ASV658	0	0	0	0	0	0	0	0	0	0	0	17	0	49	0	0	0	0	42	0	23	0	29	40
d__Bacteria	k__norank_d__Bacteria	p__Bacteroidota	c__Bacteroidia	o__Bacteroidales	f__Muribaculaceae	g__norank_f__Muribaculaceae	s__uncultured_bacterium_g__norank_f__Muribaculaceae	ASV1530	0	0	0	0	0	0	0	0	11	0	0	46	0	0	0	0	0	0	18	0	36	0	0	0
d__Bacteria	k__norank_d__Bacteria	p__Firmicutes	c__Clostridia	o__Lachnospirales	f__Lachnospiraceae	g__unclassified_f__Lachnospiraceae	s__unclassified_f__Lachnospiraceae	ASV2221	0	0	0	0	0	0	0	0	0	0	0	0	0	0	0	0	0	0	0	8	0	0	0	0
d__Bacteria	k__norank_d__Bacteria	p__Firmicutes	c__Clostridia	o__Clostridia_UCG-014	f__norank_o__Clostridia_UCG-014	g__norank_f__norank_o__Clostridia_UCG-014	s__uncultured_bacterium_g__norank_f__norank_o__Clostridia_UCG-014	ASV2334	0	0	6	0	0	0	0	0	0	0	0	0	0	0	0	0	0	0	0	0	0	0	0	0
d__Bacteria	k__norank_d__Bacteria	p__Bacteroidota	c__Bacteroidia	o__Bacteroidales	f__Muribaculaceae	g__norank_f__Muribaculaceae	s__uncultured_bacterium_g__norank_f__Muribaculaceae	ASV651	0	43	33	58	18	10	40	31	27	49	12	32	33	27	27	33	31	39	25	54	19	53	16	49
d__Bacteria	k__norank_d__Bacteria	p__Bacteroidota	c__Bacteroidia	o__Bacteroidales	f__Muribaculaceae	g__norank_f__Muribaculaceae	s__uncultured_bacterium_g__norank_f__Muribaculaceae	ASV650	7	21	52	31	31	39	24	25	98	30	6	0	16	0	30	0	27	0	11	29	29	20	6	48
d__Bacteria	k__norank_d__Bacteria	p__Firmicutes	c__Clostridia	o__Clostridia_vadinBB60_group	f__norank_o__Clostridia_vadinBB60_group	g__norank_f__norank_o__Clostridia_vadinBB60_group	s__unclassified_g__norank_f__norank_o__Clostridia_vadinBB60_group	ASV2339	0	0	6	0	0	0	0	0	0	0	0	0	0	0	0	0	0	0	0	0	0	0	0	0
d__Bacteria	k__norank_d__Bacteria	p__Firmicutes	c__Bacilli	o__unclassified_c__Bacilli	f__unclassified_c__Bacilli	g__unclassified_c__Bacilli	s__unclassified_c__Bacilli	ASV2817	0	0	0	0	0	0	0	0	0	0	0	0	0	0	0	0	0	0	0	0	0	0	1	0
d__Bacteria	k__norank_d__Bacteria	p__Bacteroidota	c__Bacteroidia	o__Bacteroidales	f__Muribaculaceae	g__norank_f__Muribaculaceae	s__uncultured_bacterium_g__norank_f__Muribaculaceae	ASV654	0	24	36	19	44	70	27	63	25	18	10	24	21	0	85	0	26	24	0	0	0	21	7	43
d__Bacteria	k__norank_d__Bacteria	p__Bacteroidota	c__Bacteroidia	o__Bacteroidales	f__Muribaculaceae	g__norank_f__Muribaculaceae	s__unclassified_g__norank_f__Muribaculaceae	ASV1137	0	0	26	17	63	0	80	0	10	0	0	0	55	0	0	7	56	0	13	0	27	10	9	0
d__Bacteria	k__norank_d__Bacteria	p__Firmicutes	c__Clostridia	o__Peptococcales	f__Peptococcaceae	g__norank_f__Peptococcaceae	s__uncultured_bacterium_g__norank_f__Peptococcaceae	ASV1053	0	2	5	2	0	5	0	5	3	2	5	7	0	2	0	8	2	0	0	0	3	3	8	0
d__Bacteria	k__norank_d__Bacteria	p__Firmicutes	c__Bacilli	o__Lactobacillales	f__Lactobacillaceae	g__Lactobacillus	s__unclassified_g__Lactobacillus	ASV387	147	160	50	59	0	108	0	120	56	132	48	96	0	97	0	66	120	23	73	80	73	0	59	159
d__Bacteria	k__norank_d__Bacteria	p__Firmicutes	c__Clostridia	o__Clostridia_UCG-014	f__norank_o__Clostridia_UCG-014	g__norank_f__norank_o__Clostridia_UCG-014	s__uncultured_bacterium_g__norank_f__norank_o__Clostridia_UCG-014	ASV1969	0	0	16	15	0	0	0	0	18	0	5	0	0	0	0	0	9	17	0	0	0	0	0	0
d__Bacteria	k__norank_d__Bacteria	p__Firmicutes	c__Clostridia	o__Clostridia_UCG-014	f__norank_o__Clostridia_UCG-014	g__norank_f__norank_o__Clostridia_UCG-014	s__uncultured_Firmicutes_bacterium_g__norank_f__norank_o__Clostridia_UCG-014	ASV3060	10	0	0	0	0	0	0	0	0	0	0	0	0	0	0	0	0	0	0	0	0	0	0	0
d__Bacteria	k__norank_d__Bacteria	p__Firmicutes	c__Clostridia	o__Clostridia_UCG-014	f__norank_o__Clostridia_UCG-014	g__norank_f__norank_o__Clostridia_UCG-014	s__unclassified_g__norank_f__norank_o__Clostridia_UCG-014	ASV80	40	56	94	70	0	22	0	35	0	13	50	0	0	0	45	0	0	47	34	0	27	45	0	16
d__Bacteria	k__norank_d__Bacteria	p__Patescibacteria	c__Saccharimonadia	o__Saccharimonadales	f__Saccharimonadaceae	g__Candidatus_Saccharimonas	s__uncultured_bacterium_g__Candidatus_Saccharimonas	ASV2808	0	0	0	0	0	0	0	0	0	0	0	0	0	0	0	0	0	0	0	0	0	0	8	0
d__Bacteria	k__norank_d__Bacteria	p__Firmicutes	c__Clostridia	o__Oscillospirales	f__Ruminococcaceae	g__Anaerotruncus	s__uncultured_bacterium_g__Anaerotruncus	ASV2885	0	0	0	0	0	0	0	0	0	0	0	0	0	0	0	0	0	3	0	0	0	0	0	0
d__Bacteria	k__norank_d__Bacteria	p__Bacteroidota	c__Bacteroidia	o__Bacteroidales	f__Muribaculaceae	g__norank_f__Muribaculaceae	s__uncultured_bacterium_g__norank_f__Muribaculaceae	ASV2378	0	0	0	0	0	0	0	0	27	0	0	0	0	0	0	0	0	0	0	0	0	0	0	0
d__Bacteria	k__norank_d__Bacteria	p__Desulfobacterota	c__Desulfovibrionia	o__Desulfovibrionales	f__Desulfovibrionaceae	g__Desulfovibrio	s__unclassified_g__Desulfovibrio	ASV2222	0	0	0	0	0	0	0	0	0	0	0	0	0	0	0	0	0	0	0	7	0	0	0	0
d__Bacteria	k__norank_d__Bacteria	p__Firmicutes	c__Bacilli	o__RF39	f__norank_o__RF39	g__norank_f__norank_o__RF39	s__unclassified_g__norank_f__norank_o__RF39	ASV2933	0	0	0	0	0	0	0	0	0	0	0	0	3	0	0	0	0	0	0	0	0	0	0	0
d__Bacteria	k__norank_d__Bacteria	p__Firmicutes	c__Clostridia	o__Clostridia_UCG-014	f__norank_o__Clostridia_UCG-014	g__norank_f__norank_o__Clostridia_UCG-014	s__unidentified_rumen_bacterium_JW32	ASV1086	0	0	0	0	0	0	0	0	0	0	60	19	0	0	0	0	0	0	0	0	0	0	0	0
d__Bacteria	k__norank_d__Bacteria	p__Bacteroidota	c__Bacteroidia	o__Bacteroidales	f__Muribaculaceae	g__norank_f__Muribaculaceae	s__uncultured_bacterium_g__norank_f__Muribaculaceae	ASV2373	0	0	0	0	0	0	0	0	32	0	0	0	0	0	0	0	0	0	0	0	0	0	0	0
d__Bacteria	k__norank_d__Bacteria	p__Desulfobacterota	c__Desulfovibrionia	o__Desulfovibrionales	f__Desulfovibrionaceae	g__Desulfovibrio	s__uncultured_bacterium_g__Desulfovibrio	ASV2330	0	0	9	0	0	0	0	7	0	0	0	0	0	0	0	0	8	0	0	0	0	0	0	0
d__Bacteria	k__norank_d__Bacteria	p__Firmicutes	c__Clostridia	o__Clostridia_UCG-014	f__norank_o__Clostridia_UCG-014	g__norank_f__norank_o__Clostridia_UCG-014	s__unclassified_g__norank_f__norank_o__Clostridia_UCG-014	ASV2293	0	0	29	0	0	0	0	0	0	0	0	0	0	0	0	0	0	0	0	0	0	0	0	0
d__Bacteria	k__norank_d__Bacteria	p__Firmicutes	c__Clostridia	o__Lachnospirales	f__Lachnospiraceae	g__unclassified_f__Lachnospiraceae	s__unclassified_f__Lachnospiraceae	ASV2917	14	0	0	0	0	0	0	0	0	0	0	0	14	0	0	0	0	0	0	0	0	0	0	0
d__Bacteria	k__norank_d__Bacteria	p__Firmicutes	c__Clostridia	o__Clostridia_UCG-014	f__norank_o__Clostridia_UCG-014	g__norank_f__norank_o__Clostridia_UCG-014	s__unclassified_g__norank_f__norank_o__Clostridia_UCG-014	ASV2743	0	0	0	0	0	0	0	0	0	0	0	0	0	0	0	4	0	5	0	0	0	0	0	0
d__Bacteria	k__norank_d__Bacteria	p__Firmicutes	c__Clostridia	o__Lachnospirales	f__Lachnospiraceae	g__unclassified_f__Lachnospiraceae	s__unclassified_f__Lachnospiraceae	ASV2915	0	0	0	0	0	0	0	0	0	0	0	0	22	0	0	0	0	0	0	0	0	0	0	0
d__Bacteria	k__norank_d__Bacteria	p__Firmicutes	c__Clostridia	o__Lachnospirales	f__Lachnospiraceae	g__unclassified_f__Lachnospiraceae	s__unclassified_f__Lachnospiraceae	ASV2912	0	0	0	0	0	0	0	0	0	0	0	0	44	0	0	0	0	0	0	0	0	0	0	0
d__Bacteria	k__norank_d__Bacteria	p__Firmicutes	c__Clostridia	o__Lachnospirales	f__Lachnospiraceae	g__unclassified_f__Lachnospiraceae	s__unclassified_f__Lachnospiraceae	ASV2910	0	2	0	0	0	0	0	0	0	0	0	0	0	0	0	0	0	0	0	0	0	0	0	0
d__Bacteria	k__norank_d__Bacteria	p__Firmicutes	c__Clostridia	o__Clostridia_UCG-014	f__norank_o__Clostridia_UCG-014	g__norank_f__norank_o__Clostridia_UCG-014	s__unclassified_g__norank_f__norank_o__Clostridia_UCG-014	ASV2748	0	0	0	0	0	0	0	0	0	0	0	0	0	0	0	1	0	0	0	0	0	0	0	0
d__Bacteria	k__norank_d__Bacteria	p__Firmicutes	c__Clostridia	o__Clostridia_UCG-014	f__norank_o__Clostridia_UCG-014	g__norank_f__norank_o__Clostridia_UCG-014	s__unclassified_g__norank_f__norank_o__Clostridia_UCG-014	ASV2298	0	0	21	0	0	16	19	0	17	0	0	0	0	0	0	0	19	0	0	0	0	0	0	0
d__Bacteria	k__norank_d__Bacteria	p__Firmicutes	c__Clostridia	o__Lachnospirales	f__Lachnospiraceae	g__unclassified_f__Lachnospiraceae	s__unclassified_f__Lachnospiraceae	ASV558	0	0	0	7	0	0	0	7	0	0	0	0	0	0	0	0	0	0	0	7	0	0	13	0
d__Bacteria	k__norank_d__Bacteria	p__Bacteroidota	c__Bacteroidia	o__Bacteroidales	f__Muribaculaceae	g__norank_f__Muribaculaceae	s__uncultured_bacterium_g__norank_f__Muribaculaceae	ASV2203	0	25	31	0	0	50	0	43	42	0	0	0	0	24	0	57	0	0	0	23	81	0	0	0
d__Bacteria	k__norank_d__Bacteria	p__Actinobacteriota	c__Coriobacteriia	o__Coriobacteriales	f__Eggerthellaceae	g__Enterorhabdus	s__uncultured_bacterium_g__Enterorhabdus	ASV610	0	2	0	0	0	0	0	0	3	0	0	0	0	0	0	0	5	0	2	1	0	0	0	0
d__Bacteria	k__norank_d__Bacteria	p__Firmicutes	c__Clostridia	o__Clostridia_UCG-014	f__norank_o__Clostridia_UCG-014	g__norank_f__norank_o__Clostridia_UCG-014	s__uncultured_bacterium_g__norank_f__norank_o__Clostridia_UCG-014	ASV3091	0	0	0	0	0	0	4	0	0	0	0	0	0	0	0	0	0	0	0	0	0	0	0	0
d__Bacteria	k__norank_d__Bacteria	p__Bacteroidota	c__Bacteroidia	o__Bacteroidales	f__Muribaculaceae	g__norank_f__Muribaculaceae	s__uncultured_bacterium_g__norank_f__Muribaculaceae	ASV2979	0	0	0	0	0	0	0	0	0	0	0	0	0	0	0	0	10	0	0	0	0	0	0	0
d__Bacteria	k__norank_d__Bacteria	p__Bacteroidota	c__Bacteroidia	o__Bacteroidales	f__Muribaculaceae	g__norank_f__Muribaculaceae	s__uncultured_bacterium_g__norank_f__Muribaculaceae	ASV2208	0	0	0	0	0	0	0	0	0	0	0	0	0	0	0	0	0	0	0	14	0	0	0	0
d__Bacteria	k__norank_d__Bacteria	p__Desulfobacterota	c__Desulfovibrionia	o__Desulfovibrionales	f__Desulfovibrionaceae	g__Desulfovibrio	s__uncultured_bacterium_g__Desulfovibrio	ASV707	0	24	10	0	0	11	0	0	0	0	0	0	0	0	0	0	0	0	0	8	0	0	0	24
d__Bacteria	k__norank_d__Bacteria	p__Bacteroidota	c__Bacteroidia	o__Bacteroidales	f__Muribaculaceae	g__norank_f__Muribaculaceae	s__unclassified_g__norank_f__Muribaculaceae	ASV2806	12	0	0	0	0	0	6	0	0	0	0	0	0	0	0	0	0	0	0	0	0	0	10	0
d__Bacteria	k__norank_d__Bacteria	p__Bacteroidota	c__Bacteroidia	o__Bacteroidales	f__Muribaculaceae	g__norank_f__Muribaculaceae	s__unclassified_g__norank_f__Muribaculaceae	ASV2801	0	0	0	0	0	0	0	0	0	0	0	0	0	0	0	0	0	0	0	0	0	0	20	0
d__Bacteria	k__norank_d__Bacteria	p__Firmicutes	c__Clostridia	o__Clostridia_UCG-014	f__norank_o__Clostridia_UCG-014	g__norank_f__norank_o__Clostridia_UCG-014	s__unclassified_g__norank_f__norank_o__Clostridia_UCG-014	ASV2340	0	0	6	0	0	0	0	0	0	0	0	0	0	0	0	0	0	0	0	0	0	0	0	0
d__Bacteria	k__norank_d__Bacteria	p__Firmicutes	c__Clostridia	o__Christensenellales	f__Christensenellaceae	g__unclassified_f__Christensenellaceae	s__unclassified_f__Christensenellaceae	ASV1111	0	0	0	4	0	2	0	0	0	0	0	0	0	0	0	0	0	0	0	0	0	0	0	0
d__Bacteria	k__norank_d__Bacteria	p__Firmicutes	c__Clostridia	o__Oscillospirales	f__Oscillospiraceae	g__unclassified_f__Oscillospiraceae	s__unclassified_f__Oscillospiraceae	ASV720	0	19	16	21	0	0	0	22	0	0	0	0	0	0	0	0	0	0	0	21	0	0	0	22
d__Bacteria	k__norank_d__Bacteria	p__Firmicutes	c__Clostridia	o__Oscillospirales	f__Ruminococcaceae	g__norank_f__Ruminococcaceae	s__unclassified_g__norank_f__Ruminococcaceae	ASV2483	0	17	0	0	0	0	0	0	0	0	7	0	0	0	0	0	0	0	0	0	0	0	0	0
d__Bacteria	k__norank_d__Bacteria	p__Firmicutes	c__Clostridia	o__Lachnospirales	f__Lachnospiraceae	g__unclassified_f__Lachnospiraceae	s__unclassified_f__Lachnospiraceae	ASV797	0	9	0	0	0	0	0	11	0	0	15	0	0	0	5	0	33	0	16	0	0	9	16	13
d__Bacteria	k__norank_d__Bacteria	p__Bacteroidota	c__Bacteroidia	o__Bacteroidales	f__Muribaculaceae	g__norank_f__Muribaculaceae	s__unclassified_g__norank_f__Muribaculaceae	ASV1821	0	0	0	0	0	0	0	0	23	0	0	53	0	0	0	0	0	0	0	0	0	40	44	0
d__Bacteria	k__norank_d__Bacteria	p__Firmicutes	c__Clostridia	o__Oscillospirales	f__Oscillospiraceae	g__unclassified_f__Oscillospiraceae	s__unclassified_f__Oscillospiraceae	ASV2382	0	0	0	0	0	0	0	0	26	0	0	0	0	0	0	0	0	0	0	0	0	0	0	0
d__Bacteria	k__norank_d__Bacteria	p__Firmicutes	c__Clostridia	o__Lachnospirales	f__Lachnospiraceae	g__unclassified_f__Lachnospiraceae	s__unclassified_f__Lachnospiraceae	ASV792	0	0	0	14	0	10	0	0	0	0	0	0	0	0	0	0	0	0	0	0	0	0	0	12
d__Bacteria	k__norank_d__Bacteria	p__Firmicutes	c__Clostridia	o__Lachnospirales	f__Lachnospiraceae	g__unclassified_f__Lachnospiraceae	s__unclassified_f__Lachnospiraceae	ASV799	0	0	0	27	0	0	0	16	0	12	0	0	0	0	0	0	0	0	0	0	0	0	0	12
d__Bacteria	k__norank_d__Bacteria	p__Bacteroidota	c__Bacteroidia	o__Bacteroidales	f__Prevotellaceae	g__Prevotellaceae_UCG-001	s__uncultured_bacterium_g__Prevotellaceae_UCG-001	ASV847	75	10	4	3	0	0	0	5	19	0	0	0	16	0	0	0	0	0	0	37	9	17	8	7
d__Bacteria	k__norank_d__Bacteria	p__Firmicutes	c__Bacilli	o__Mycoplasmatales	f__Mycoplasmataceae	g__Mycoplasma	s__unclassified_g__Mycoplasma	ASV2096	0	2	0	0	0	0	0	5	0	4	0	0	0	0	0	0	0	0	0	0	0	0	7	0
d__Bacteria	k__norank_d__Bacteria	p__Firmicutes	c__Clostridia	o__Oscillospirales	f__Oscillospiraceae	g__unclassified_f__Oscillospiraceae	s__unclassified_f__Oscillospiraceae	ASV2262	0	0	0	0	0	0	0	0	0	0	0	0	0	11	0	0	0	0	0	0	0	0	0	0
d__Bacteria	k__norank_d__Bacteria	p__Bacteroidota	c__Bacteroidia	o__Bacteroidales	f__Muribaculaceae	g__norank_f__Muribaculaceae	s__unclassified_g__norank_f__Muribaculaceae	ASV638	11	63	7	30	39	0	34	43	21	45	14	5	121	0	126	0	68	18	0	0	16	0	3	64
d__Bacteria	k__norank_d__Bacteria	p__Firmicutes	c__Clostridia	o__Lachnospirales	f__Lachnospiraceae	g__unclassified_f__Lachnospiraceae	s__unclassified_f__Lachnospiraceae	ASV1490	0	0	0	0	0	0	0	0	0	0	0	0	0	0	0	0	0	0	34	0	0	0	0	0
d__Bacteria	k__norank_d__Bacteria	p__Firmicutes	c__Clostridia	o__Oscillospirales	f__Oscillospiraceae	g__Colidextribacter	s__unclassified_g__Colidextribacter	ASV2854	0	0	0	0	0	0	0	0	0	0	0	48	0	0	0	0	0	34	0	0	0	0	0	0
d__Bacteria	k__norank_d__Bacteria	p__Firmicutes	c__Clostridia	o__Lachnospirales	f__Lachnospiraceae	g__unclassified_f__Lachnospiraceae	s__unclassified_f__Lachnospiraceae	ASV1495	0	0	0	0	0	0	0	26	0	0	0	0	0	0	0	0	0	15	27	0	0	0	0	0
d__Bacteria	k__norank_d__Bacteria	p__Firmicutes	c__Clostridia	o__unclassified_c__Clostridia	f__unclassified_c__Clostridia	g__unclassified_c__Clostridia	s__unclassified_c__Clostridia	ASV2781	0	0	0	0	0	0	0	6	0	0	0	0	0	0	0	0	0	0	0	0	0	0	0	0
d__Bacteria	k__norank_d__Bacteria	p__Firmicutes	c__Bacilli	o__Bacillales	f__Bacillaceae	g__Bacillus	s__Lactobacillus_vaginalis_g__Bacillus	ASV728	0	0	0	0	0	0	0	0	0	0	0	0	0	0	0	0	0	0	0	0	0	0	0	22
d__Bacteria	k__norank_d__Bacteria	p__Bacteroidota	c__Bacteroidia	o__Bacteroidales	f__Muribaculaceae	g__norank_f__Muribaculaceae	s__uncultured_bacterium_g__norank_f__Muribaculaceae	ASV1954	0	0	0	14	0	0	0	0	0	0	23	35	0	0	0	0	0	0	0	19	26	0	0	0
d__Bacteria	k__norank_d__Bacteria	p__Firmicutes	c__Clostridia	o__Lachnospirales	f__Lachnospiraceae	g__Blautia	s__Lachnospiraceae_bacterium_DW59	ASV735	0	0	0	0	0	0	0	0	0	0	17	5	0	0	14	0	0	0	0	0	0	0	0	18
d__Bacteria	k__norank_d__Bacteria	p__Bacteroidota	c__Bacteroidia	o__Bacteroidales	f__Muribaculaceae	g__norank_f__Muribaculaceae	s__uncultured_bacterium_g__norank_f__Muribaculaceae	ASV2687	0	0	0	0	0	0	0	0	0	0	0	0	0	0	0	0	0	0	0	0	5	0	0	0
d__Bacteria	k__norank_d__Bacteria	p__Firmicutes	c__Clostridia	o__Lachnospirales	f__Lachnospiraceae	g__Lachnospiraceae_NK4A136_group	s__unclassified_g__Lachnospiraceae_NK4A136_group	ASV2440	0	0	0	0	0	0	0	0	0	0	74	0	0	0	0	265	0	0	0	0	0	0	0	0
d__Bacteria	k__norank_d__Bacteria	p__Firmicutes	c__Clostridia	o__Oscillospirales	f__Oscillospiraceae	g__unclassified_f__Oscillospiraceae	s__unclassified_f__Oscillospiraceae	ASV2669	0	0	0	0	0	0	0	0	0	0	0	0	0	0	0	0	0	0	0	0	21	0	0	0
d__Bacteria	k__norank_d__Bacteria	p__Firmicutes	c__Clostridia	o__Lachnospirales	f__Lachnospiraceae	g__Lachnospiraceae_NK4A136_group	s__unclassified_g__Lachnospiraceae_NK4A136_group	ASV1922	0	0	0	65	0	0	0	0	0	0	0	0	0	0	0	0	0	0	0	0	0	0	46	0
d__Bacteria	k__norank_d__Bacteria	p__Firmicutes	c__Clostridia	o__Lachnospirales	f__Lachnospiraceae	g__Lachnospiraceae_NK4A136_group	s__unclassified_g__Lachnospiraceae_NK4A136_group	ASV1924	0	0	0	56	0	0	0	25	0	0	0	0	0	0	0	0	0	0	0	0	0	0	0	0
d__Bacteria	k__norank_d__Bacteria	p__Firmicutes	c__Clostridia	o__Lachnospirales	f__Lachnospiraceae	g__Lachnospiraceae_NK4A136_group	s__unclassified_g__Lachnospiraceae_NK4A136_group	ASV1928	0	0	0	53	0	0	0	0	0	0	0	0	0	0	0	0	0	0	0	0	0	0	0	0
d__Bacteria	k__norank_d__Bacteria	p__Firmicutes	c__Clostridia	o__Oscillospirales	f__Ruminococcaceae	g__norank_f__Ruminococcaceae	s__unclassified_g__norank_f__Ruminococcaceae	ASV2218	0	0	0	0	0	0	0	0	0	0	0	0	0	0	0	0	0	0	0	5	0	0	0	0
d__Bacteria	k__norank_d__Bacteria	p__Firmicutes	c__Clostridia	o__Oscillospirales	f__Oscillospiraceae	g__unclassified_f__Oscillospiraceae	s__unclassified_f__Oscillospiraceae	ASV2469	0	0	0	0	0	0	0	0	0	0	14	0	0	0	0	0	0	0	0	0	0	0	0	0
d__Bacteria	k__norank_d__Bacteria	p__Bacteroidota	c__Bacteroidia	o__Bacteroidales	f__Muribaculaceae	g__norank_f__Muribaculaceae	s__uncultured_bacterium_g__norank_f__Muribaculaceae	ASV1885	0	0	0	0	0	0	0	0	0	0	0	0	0	0	0	0	0	0	0	0	0	5	0	0
d__Bacteria	k__norank_d__Bacteria	p__Bacteroidota	c__Bacteroidia	o__Bacteroidales	f__Muribaculaceae	g__norank_f__Muribaculaceae	s__uncultured_bacterium_g__norank_f__Muribaculaceae	ASV1886	0	5	0	0	0	0	0	0	2	7	0	0	4	0	4	10	7	0	0	11	2	8	5	0
d__Bacteria	k__norank_d__Bacteria	p__Bacteroidota	c__Bacteroidia	o__Bacteroidales	f__Prevotellaceae	g__Prevotella	s__uncultured_bacterium_g__Prevotella	ASV813	45	0	39	10	0	21	9	14	19	135	16	40	12	3	39	20	7	20	0	43	19	33	0	11
d__Bacteria	k__norank_d__Bacteria	p__Firmicutes	c__Clostridia	o__Peptostreptococcales-Tissierellales	f__Anaerovoracaceae	g__Family_XIII_AD3011_group	s__unclassified_g__Family_XIII_AD3011_group	ASV2735	0	0	0	0	0	0	0	0	0	0	0	0	0	0	0	6	0	0	0	0	0	0	2	0
d__Bacteria	k__norank_d__Bacteria	p__Firmicutes	c__Clostridia	o__Lachnospirales	f__Lachnospiraceae	g__unclassified_f__Lachnospiraceae	s__unclassified_f__Lachnospiraceae	ASV2026	0	0	10	3	0	0	0	0	0	0	0	0	0	0	0	0	0	0	0	0	10	0	0	0
d__Bacteria	k__norank_d__Bacteria	p__Bacteroidota	c__Bacteroidia	o__Bacteroidales	f__Muribaculaceae	g__norank_f__Muribaculaceae	s__uncultured_bacterium_g__norank_f__Muribaculaceae	ASV2192	0	13	0	0	0	0	0	0	0	0	0	0	0	0	37	14	0	0	0	32	20	0	0	0
d__Bacteria	k__norank_d__Bacteria	p__Bacteroidota	c__Bacteroidia	o__Bacteroidales	f__Muribaculaceae	g__norank_f__Muribaculaceae	s__uncultured_bacterium_g__norank_f__Muribaculaceae	ASV822	0	11	0	0	0	0	0	7	0	22	31	0	0	0	0	90	0	0	0	0	0	0	0	10
d__Bacteria	k__norank_d__Bacteria	p__Bacteroidota	c__Bacteroidia	o__Bacteroidales	f__Muribaculaceae	g__norank_f__Muribaculaceae	s__uncultured_bacterium_g__norank_f__Muribaculaceae	ASV823	0	10	24	6	3	19	4	0	4	0	14	16	4	0	5	16	22	13	6	4	10	18	5	11
d__Bacteria	k__norank_d__Bacteria	p__Bacteroidota	c__Bacteroidia	o__Bacteroidales	f__Muribaculaceae	g__norank_f__Muribaculaceae	s__uncultured_bacterium_g__norank_f__Muribaculaceae	ASV2197	0	0	0	0	0	0	0	0	0	0	0	0	0	0	0	0	0	0	0	27	0	0	0	0
d__Bacteria	k__norank_d__Bacteria	p__Firmicutes	c__Clostridia	o__Lachnospirales	f__Lachnospiraceae	g__unclassified_f__Lachnospiraceae	s__unclassified_f__Lachnospiraceae	ASV1673	13	0	0	0	0	13	0	15	0	0	0	0	0	13	0	0	0	13	0	0	0	0	0	0
d__Bacteria	k__norank_d__Bacteria	p__Bacteroidota	c__Bacteroidia	o__Bacteroidales	f__Muribaculaceae	g__norank_f__Muribaculaceae	s__uncultured_bacterium_g__norank_f__Muribaculaceae	ASV2195	0	0	0	0	0	0	0	0	0	0	0	0	0	0	0	0	0	0	0	29	0	0	0	0
d__Bacteria	k__norank_d__Bacteria	p__Firmicutes	c__Bacilli	o__RF39	f__norank_o__RF39	g__norank_f__norank_o__RF39	s__uncultured_Lachnospiraceae_bacterium_g__norank_f__norank	ASV3013	0	0	0	0	0	0	0	0	0	0	0	13	0	0	0	0	0	0	0	0	0	0	0	0
d__Bacteria	k__norank_d__Bacteria	p__Bacteroidota	c__Bacteroidia	o__Bacteroidales	f__Muribaculaceae	g__norank_f__Muribaculaceae	s__uncultured_bacterium_g__norank_f__Muribaculaceae	ASV829	0	0	2	0	0	0	0	0	0	0	0	0	0	0	0	0	0	6	2	0	0	0	0	8
d__Bacteria	k__norank_d__Bacteria	p__Bacteroidota	c__Bacteroidia	o__Bacteroidales	f__Muribaculaceae	g__norank_f__Muribaculaceae	s__uncultured_bacterium_g__norank_f__Muribaculaceae	ASV2198	0	0	0	0	0	0	0	0	0	0	0	0	0	0	21	0	0	0	0	26	0	0	0	0
d__Bacteria	k__norank_d__Bacteria	p__Firmicutes	c__Bacilli	o__RF39	f__norank_o__RF39	g__norank_f__norank_o__RF39	s__uncultured_Lachnospiraceae_bacterium_g__norank_f__norank	ASV2013	0	0	0	5	0	0	0	0	0	0	0	0	0	0	0	0	0	0	0	0	0	0	0	0
d__Bacteria	k__norank_d__Bacteria	p__Firmicutes	c__Bacilli	o__Lactobacillales	f__Lactobacillaceae	g__Lactobacillus	s__unclassified_g__Lactobacillus	ASV2399	0	0	0	0	0	0	0	0	8	0	0	0	0	0	0	0	0	0	0	0	0	0	0	0
d__Bacteria	k__norank_d__Bacteria	p__Firmicutes	c__Negativicutes	o__Veillonellales-Selenomonadales	f__Selenomonadaceae	g__Quinella	s__uncultured_bacterium_g__Quinella	ASV1857	0	0	0	0	0	0	0	26	0	0	0	0	0	0	0	0	19	0	0	0	0	18	38	0
d__Bacteria	k__norank_d__Bacteria	p__Firmicutes	c__Bacilli	o__Staphylococcales	f__Gemellaceae	g__Gemella	s__unclassified_g__Gemella	ASV2231	0	0	0	0	0	0	0	0	0	0	0	0	0	0	0	0	0	0	0	5	0	0	0	0
d__Bacteria	k__norank_d__Bacteria	p__Bacteroidota	c__Bacteroidia	o__Bacteroidales	f__Muribaculaceae	g__norank_f__Muribaculaceae	s__uncultured_bacterium_g__norank_f__Muribaculaceae	ASV2411	0	0	0	0	0	0	0	0	7	0	0	0	0	0	0	0	0	0	0	0	0	0	0	0
d__Bacteria	k__norank_d__Bacteria	p__Firmicutes	c__Bacilli	o__Acholeplasmatales	f__Acholeplasmataceae	g__Anaeroplasma	s__uncultured_bacterium_g__Anaeroplasma	ASV1148	0	0	0	0	48	0	26	4	0	0	71	21	0	0	0	22	15	0	0	0	0	0	12	0
d__Bacteria	k__norank_d__Bacteria	p__Deferribacterota	c__Deferribacteres	o__Deferribacterales	f__Deferribacteraceae	g__Mucispirillum	s__unclassified_g__Mucispirillum	ASV2492	0	0	0	0	0	0	0	0	0	0	6	0	0	0	0	0	0	0	0	0	0	0	0	0
d__Bacteria	k__norank_d__Bacteria	p__Firmicutes	c__Clostridia	o__Oscillospirales	f__Ruminococcaceae	g__Ruminococcus	s__unclassified_g__Ruminococcus	ASV248	0	0	0	0	0	21	0	0	0	0	0	0	0	0	0	0	0	0	0	0	0	0	0	0
d__Bacteria	k__norank_d__Bacteria	p__Firmicutes	c__Clostridia	o__Lachnospirales	f__Lachnospiraceae	g__unclassified_f__Lachnospiraceae	s__unclassified_f__Lachnospiraceae	ASV1717	0	0	0	11	0	0	9	0	0	0	0	0	14	0	0	10	21	0	0	0	0	14	0	0
d__Bacteria	k__norank_d__Bacteria	p__Firmicutes	c__Bacilli	o__Bacillales	f__Bacillaceae	g__Bacillus	s__Lactobacillus_vaginalis_g__Bacillus	ASV140	117	222	51	61	236	156	102	140	137	105	145	143	200	167	86	48	192	27	65	91	68	89	46	154
d__Bacteria	k__norank_d__Bacteria	p__Firmicutes	c__Clostridia	o__Lachnospirales	f__Lachnospiraceae	g__Lachnospiraceae_UCG-001	s__unclassified_g__Lachnospiraceae_UCG-001	ASV2370	0	0	0	0	0	0	0	0	36	0	0	0	0	0	0	0	0	0	0	0	0	0	0	0
d__Bacteria	k__norank_d__Bacteria	p__Cyanobacteria	c__Vampirivibrionia	o__Gastranaerophilales	f__norank_o__Gastranaerophilales	g__norank_f__norank_o__Gastranaerophilales	s__unclassified_g__norank_f__norank_o__Gastranaerophilales	ASV2012	0	0	0	6	0	0	0	0	0	0	0	0	0	0	0	0	0	0	0	0	0	0	0	0
d__Bacteria	k__norank_d__Bacteria	p__Firmicutes	c__Clostridia	o__Peptostreptococcales-Tissierellales	f__Anaerovoracaceae	g__Eubacterium_nodatum_group	s__unclassified_g__Eubacterium_nodatum_group	ASV2844	0	0	0	0	0	0	0	0	0	0	0	0	0	0	3	0	0	0	0	0	0	0	0	0
d__Bacteria	k__norank_d__Bacteria	p__Desulfobacterota	c__Desulfovibrionia	o__Desulfovibrionales	f__Desulfovibrionaceae	g__Desulfovibrio	s__uncultured_bacterium_g__Desulfovibrio	ASV1986	0	0	0	7	0	0	0	0	0	0	0	0	0	0	0	0	0	0	0	0	0	0	0	0
d__Bacteria	k__norank_d__Bacteria	p__Firmicutes	c__Bacilli	o__Lactobacillales	f__Lactobacillaceae	g__Lactobacillus	s__unclassified_g__Lactobacillus	ASV2804	0	0	0	0	0	0	0	0	0	0	0	0	0	0	0	0	0	0	0	0	0	0	13	0
d__Bacteria	k__norank_d__Bacteria	p__Firmicutes	c__Bacilli	o__Bacillales	f__Bacillaceae	g__Bacillus	s__Lactobacillus_vaginalis_g__Bacillus	ASV2260	0	0	0	0	0	0	0	0	0	0	0	0	0	15	0	0	0	0	0	0	0	0	0	0
d__Bacteria	k__norank_d__Bacteria	p__Firmicutes	c__Bacilli	o__Lactobacillales	f__Lactobacillaceae	g__Lactobacillus	s__unclassified_g__Lactobacillus	ASV2367	0	0	0	0	0	0	0	0	42	0	0	0	0	0	0	0	0	0	0	0	0	0	0	0
d__Bacteria	k__norank_d__Bacteria	p__Firmicutes	c__Clostridia	o__Clostridia_vadinBB60_group	f__norank_o__Clostridia_vadinBB60_group	g__norank_f__norank_o__Clostridia_vadinBB60_group	s__uncultured_bacterium_g__norank_f__norank_o__Clostridia_vadinBB60_group	ASV255	5	0	0	8	0	0	11	0	0	0	0	0	0	0	5	0	6	9	0	6	34	7	0	0
d__Bacteria	k__norank_d__Bacteria	p__Firmicutes	c__Clostridia	o__Oscillospirales	f__Ruminococcaceae	g__norank_f__Ruminococcaceae	s__unclassified_g__norank_f__Ruminococcaceae	ASV2039	0	0	0	2	0	0	0	0	0	0	0	0	0	0	0	0	0	0	0	0	0	0	0	0
d__Bacteria	k__norank_d__Bacteria	p__Firmicutes	c__Clostridia	o__Oscillospirales	f__Ruminococcaceae	g__Eubacterium_siraeum_group	s__uncultured_bacterium_g__Eubacterium_siraeum_group	ASV2530	0	0	0	0	0	13	0	0	0	0	0	0	0	0	0	0	0	6	0	0	0	0	0	0
d__Bacteria	k__norank_d__Bacteria	p__Firmicutes	c__Clostridia	o__Oscillospirales	f__Ruminococcaceae	g__Eubacterium_siraeum_group	s__uncultured_bacterium_g__Eubacterium_siraeum_group	ASV2535	0	0	0	0	0	13	0	0	0	0	0	0	0	0	0	0	0	0	0	0	0	0	23	0
d__Bacteria	k__norank_d__Bacteria	p__Firmicutes	c__Clostridia	o__Lachnospirales	f__Lachnospiraceae	g__unclassified_f__Lachnospiraceae	s__unclassified_f__Lachnospiraceae	ASV2359	0	0	0	0	0	0	0	0	365	0	0	0	0	0	0	0	0	0	0	0	0	0	0	0
d__Bacteria	k__norank_d__Bacteria	p__Bacteroidota	c__Bacteroidia	o__Bacteroidales	f__Muribaculaceae	g__norank_f__Muribaculaceae	s__uncultured_bacterium_g__norank_f__Muribaculaceae	ASV724	28	38	17	29	14	9	14	12	31	39	42	20	33	30	48	23	17	39	18	11	39	13	20	21
d__Bacteria	k__norank_d__Bacteria	p__Bacteroidota	c__Bacteroidia	o__Bacteroidales	f__Muribaculaceae	g__norank_f__Muribaculaceae	s__uncultured_bacterium_g__norank_f__Muribaculaceae	ASV3004	0	0	0	0	0	0	0	0	0	0	0	27	0	0	0	0	0	0	0	0	0	0	0	0
d__Bacteria	k__norank_d__Bacteria	p__Firmicutes	c__Bacilli	o__RF39	f__norank_o__RF39	g__norank_f__norank_o__RF39	s__uncultured_bacterium_g__norank_f__norank_o__RF39	ASV1562	0	0	8	6	0	0	0	0	0	0	0	0	6	0	0	4	0	0	10	0	7	0	0	0
d__Bacteria	k__norank_d__Bacteria	p__Bacteroidota	c__Bacteroidia	o__Bacteroidales	f__Muribaculaceae	g__norank_f__Muribaculaceae	s__uncultured_bacterium_g__norank_f__Muribaculaceae	ASV3001	0	0	0	0	0	0	0	0	0	0	0	73	0	0	0	0	0	0	0	0	0	0	0	0
d__Bacteria	k__norank_d__Bacteria	p__Bacteroidota	c__Bacteroidia	o__Bacteroidales	f__Muribaculaceae	g__norank_f__Muribaculaceae	s__unclassified_g__norank_f__Muribaculaceae	ASV701	30	33	0	0	0	0	0	0	41	25	0	0	0	31	29	0	0	0	29	42	0	0	40	29
d__Bacteria	k__norank_d__Bacteria	p__Bacteroidota	c__Bacteroidia	o__Bacteroidales	f__Muribaculaceae	g__norank_f__Muribaculaceae	s__unclassified_g__norank_f__Muribaculaceae	ASV700	32	48	94	63	74	50	85	11	73	36	9	32	32	20	106	248	43	189	62	47	126	33	52	23
d__Bacteria	k__norank_d__Bacteria	p__Firmicutes	c__Clostridia	o__Lachnospirales	f__Lachnospiraceae	g__unclassified_f__Lachnospiraceae	s__unclassified_f__Lachnospiraceae	ASV1812	0	0	0	0	0	0	0	0	0	0	0	0	0	0	0	0	0	0	0	28	0	54	0	0
d__Bacteria	k__norank_d__Bacteria	p__Firmicutes	c__Clostridia	o__Lachnospirales	f__Lachnospiraceae	g__unclassified_f__Lachnospiraceae	s__unclassified_f__Lachnospiraceae	ASV1810	0	0	0	0	0	0	0	0	0	0	0	0	0	0	0	0	0	41	0	0	0	69	0	0
d__Bacteria	k__norank_d__Bacteria	p__Firmicutes	c__Bacilli	o__unclassified_c__Bacilli	f__unclassified_c__Bacilli	g__unclassified_c__Bacilli	s__unclassified_c__Bacilli	ASV275	47	37	9	23	60	37	32	34	25	50	19	27	47	43	34	32	48	1	13	29	37	34	51	37
d__Bacteria	k__norank_d__Bacteria	p__Firmicutes	c__Clostridia	o__Lachnospirales	f__Lachnospiraceae	g__unclassified_f__Lachnospiraceae	s__unclassified_f__Lachnospiraceae	ASV2905	0	6	0	0	0	0	0	0	0	0	0	0	0	0	0	0	0	0	0	0	0	0	0	0
d__Bacteria	k__norank_d__Bacteria	p__Firmicutes	c__Clostridia	o__Lachnospirales	f__Lachnospiraceae	g__unclassified_f__Lachnospiraceae	s__unclassified_f__Lachnospiraceae	ASV2904	0	7	0	0	0	0	0	0	0	0	0	0	0	0	0	0	0	0	0	0	0	0	0	0
d__Bacteria	k__norank_d__Bacteria	p__Bacteroidota	c__Bacteroidia	o__Bacteroidales	f__Muribaculaceae	g__norank_f__Muribaculaceae	s__uncultured_bacterium_g__norank_f__Muribaculaceae	ASV2213	98	0	0	0	0	0	0	0	0	0	15	29	0	0	0	0	0	0	0	11	0	0	20	0
d__Bacteria	k__norank_d__Bacteria	p__Bacteroidota	c__Bacteroidia	o__Bacteroidales	f__Muribaculaceae	g__norank_f__Muribaculaceae	s__uncultured_bacterium_g__norank_f__Muribaculaceae	ASV2214	0	0	0	0	0	0	0	0	0	0	0	0	5	0	0	1	0	0	0	7	9	0	0	0
d__Bacteria	k__norank_d__Bacteria	p__Bacteroidota	c__Bacteroidia	o__Bacteroidales	f__Muribaculaceae	g__norank_f__Muribaculaceae	s__uncultured_bacterium_g__norank_f__Muribaculaceae	ASV2216	0	0	0	0	0	0	0	0	0	0	0	0	0	0	0	0	0	0	0	8	0	0	0	0
d__Bacteria	k__norank_d__Bacteria	p__Firmicutes	c__Bacilli	o__unclassified_c__Bacilli	f__unclassified_c__Bacilli	g__unclassified_c__Bacilli	s__unclassified_c__Bacilli	ASV1134	0	0	0	0	114	0	127	0	0	0	0	0	143	0	54	0	0	0	0	0	0	0	0	0
d__Bacteria	k__norank_d__Bacteria	p__Bacteroidota	c__Bacteroidia	o__Bacteroidales	f__Muribaculaceae	g__norank_f__Muribaculaceae	s__unclassified_g__norank_f__Muribaculaceae	ASV2812	0	0	0	0	0	0	0	0	0	0	0	0	0	0	0	0	0	0	0	0	0	0	3	0
d__Bacteria	k__norank_d__Bacteria	p__Firmicutes	c__Clostridia	o__Oscillospirales	f__Oscillospiraceae	g__unclassified_f__Oscillospiraceae	s__unclassified_f__Oscillospiraceae	ASV711	0	27	0	14	0	25	20	0	20	0	13	0	18	18	0	0	12	18	19	0	0	15	0	22
d__Bacteria	k__norank_d__Bacteria	p__Firmicutes	c__Clostridia	o__Clostridia_UCG-014	f__norank_o__Clostridia_UCG-014	g__norank_f__norank_o__Clostridia_UCG-014	s__unclassified_g__norank_f__norank_o__Clostridia_UCG-014	ASV1532	0	0	0	0	0	0	0	0	0	0	0	0	0	0	0	0	0	0	16	8	0	16	0	0
d__Bacteria	k__norank_d__Bacteria	p__Firmicutes	c__Clostridia	o__Oscillospirales	f__Oscillospiraceae	g__unclassified_f__Oscillospiraceae	s__unclassified_f__Oscillospiraceae	ASV712	0	0	0	10	0	0	11	0	9	17	0	0	0	0	0	0	18	14	0	0	0	0	0	19
d__Bacteria	k__norank_d__Bacteria	p__Firmicutes	c__Clostridia	o__Lachnospirales	f__Lachnospiraceae	g__unclassified_f__Lachnospiraceae	s__unclassified_f__Lachnospiraceae	ASV782	0	0	10	32	0	0	0	0	0	0	0	0	0	6	0	0	0	0	0	0	0	0	23	16
d__Bacteria	k__norank_d__Bacteria	p__Bacteroidota	c__Bacteroidia	o__Bacteroidales	f__Muribaculaceae	g__norank_f__Muribaculaceae	s__unclassified_g__norank_f__Muribaculaceae	ASV1854	0	0	0	0	0	0	0	0	0	0	0	0	0	0	0	0	0	0	0	26	0	18	0	0
d__Bacteria	k__norank_d__Bacteria	p__Bacteroidota	c__Bacteroidia	o__Bacteroidales	f__Muribaculaceae	g__norank_f__Muribaculaceae	s__unclassified_g__norank_f__Muribaculaceae	ASV1853	0	0	0	0	0	0	0	0	0	0	0	0	15	0	0	0	0	0	0	0	0	18	0	0
d__Bacteria	k__norank_d__Bacteria	p__Desulfobacterota	c__Desulfovibrionia	o__Desulfovibrionales	f__Desulfovibrionaceae	g__norank_f__Desulfovibrionaceae	s__uncultured_bacterium_g__norank_f__Desulfovibrionaceae	ASV2814	0	0	0	0	0	0	0	0	0	0	0	0	0	0	0	0	0	8	0	0	0	0	2	0
d__Bacteria	k__norank_d__Bacteria	p__Firmicutes	c__Clostridia	o__Lachnospirales	f__Lachnospiraceae	g__unclassified_f__Lachnospiraceae	s__unclassified_f__Lachnospiraceae	ASV785	0	0	24	22	0	0	0	0	5	0	0	0	28	0	0	0	0	0	0	0	0	0	0	11
d__Bacteria	k__norank_d__Bacteria	p__Firmicutes	c__Clostridia	o__Oscillospirales	f__Ruminococcaceae	g__Pygmaiobacter	s__uncultured_bacterium_g__Pygmaiobacter	ASV883	8	15	0	0	5	6	9	6	10	0	0	0	5	0	0	0	0	0	0	0	0	7	2	6
d__Bacteria	k__norank_d__Bacteria	p__Firmicutes	c__Clostridia	o__Oscillospirales	f__Oscillospiraceae	g__unclassified_f__Oscillospiraceae	s__unclassified_f__Oscillospiraceae	ASV1583	0	0	7	4	0	0	0	0	0	0	0	0	0	0	0	0	0	7	2	0	0	0	0	0
d__Bacteria	k__norank_d__Bacteria	p__Firmicutes	c__Clostridia	o__Lachnospirales	f__Lachnospiraceae	g__unclassified_f__Lachnospiraceae	s__unclassified_f__Lachnospiraceae	ASV304	0	0	0	0	0	0	7	19	0	0	0	0	13	0	4	0	0	0	0	0	6	3	5	0
d__Bacteria	k__norank_d__Bacteria	p__Firmicutes	c__Bacilli	o__Bacillales	f__Bacillaceae	g__Bacillus	s__Lactobacillus_vaginalis_g__Bacillus	ASV2795	0	0	0	0	0	0	0	0	0	0	0	0	0	0	0	0	0	0	0	0	0	0	54	0
d__Bacteria	k__norank_d__Bacteria	p__Firmicutes	c__Bacilli	o__Bacillales	f__Bacillaceae	g__Bacillus	s__Lactobacillus_vaginalis_g__Bacillus	ASV2796	0	0	0	0	0	0	0	0	0	0	0	0	0	0	0	0	0	0	0	0	0	0	53	0
d__Bacteria	k__norank_d__Bacteria	p__Firmicutes	c__Bacilli	o__RF39	f__norank_o__RF39	g__norank_f__norank_o__RF39	s__unclassified_g__norank_f__norank_o__RF39	ASV2673	0	0	0	0	0	0	0	0	0	0	0	0	0	0	0	0	0	14	0	0	8	0	0	0
d__Bacteria	k__norank_d__Bacteria	p__Firmicutes	c__Clostridia	o__Oscillospirales	f__Oscillospiraceae	g__unclassified_f__Oscillospiraceae	s__unclassified_f__Oscillospiraceae	ASV2865	0	0	0	0	0	0	0	0	0	0	0	0	0	0	0	0	0	10	0	0	0	0	0	0
d__Bacteria	k__norank_d__Bacteria	p__Firmicutes	c__Clostridia	o__Lachnospirales	f__Lachnospiraceae	g__unclassified_f__Lachnospiraceae	s__unclassified_f__Lachnospiraceae	ASV669	0	54	0	64	0	0	26	42	117	36	0	0	46	0	0	0	0	45	0	0	0	0	0	35
d__Bacteria	k__norank_d__Bacteria	p__Firmicutes	c__Clostridia	o__Oscillospirales	f__Ruminococcaceae	g__Ruminococcus	s__unclassified_g__Ruminococcus	ASV1342	0	0	0	78	0	0	0	0	88	0	0	16	0	0	0	103	0	0	0	0	0	0	0	0
d__Bacteria	k__norank_d__Bacteria	p__Firmicutes	c__Clostridia	o__Monoglobales	f__Monoglobaceae	g__Monoglobus	s__unclassified_g__Monoglobus	ASV2773	0	0	0	0	0	0	0	7	0	0	0	0	0	0	0	0	0	0	0	0	0	0	0	0
d__Bacteria	k__norank_d__Bacteria	p__Firmicutes	c__Clostridia	o__Lachnospirales	f__Lachnospiraceae	g__Lachnospiraceae_FCS020_group	s__unclassified_g__Lachnospiraceae_FCS020_group	ASV2002	0	0	8	5	0	0	0	0	0	0	0	0	0	0	0	0	8	8	0	0	0	0	0	0
d__Bacteria	k__norank_d__Bacteria	p__Actinobacteriota	c__Coriobacteriia	o__Coriobacteriales	f__Eggerthellaceae	g__Enterorhabdus	s__uncultured_bacterium_g__Enterorhabdus	ASV2490	0	0	0	0	0	0	0	0	0	0	5	5	0	0	0	0	0	0	0	0	0	0	0	0
d__Bacteria	k__norank_d__Bacteria	p__Firmicutes	c__Clostridia	o__Oscillospirales	f__Oscillospiraceae	g__unclassified_f__Oscillospiraceae	s__unclassified_f__Oscillospiraceae	ASV575	0	18	0	0	0	0	10	9	0	0	0	0	0	0	0	0	0	0	0	0	0	9	15	12
d__Bacteria	k__norank_d__Bacteria	p__Firmicutes	c__Bacilli	o__Lactobacillales	f__Lactobacillaceae	g__Lactobacillus	s__unclassified_g__Lactobacillus	ASV1172	14	16	0	4	24	0	25	0	5	0	0	0	18	17	7	5	8	0	0	0	0	0	10	0
d__Bacteria	k__norank_d__Bacteria	p__Firmicutes	c__Clostridia	o__Oscillospirales	f__Ruminococcaceae	g__Candidatus_Soleaferrea	s__uncultured_bacterium_g__Candidatus_Soleaferrea	ASV2995	0	0	0	0	0	0	0	0	0	0	0	0	0	0	0	0	3	0	0	0	0	0	0	0
d__Bacteria	k__norank_d__Bacteria	p__Firmicutes	c__Clostridia	o__Lachnospirales	f__Lachnospiraceae	g__GCA-900066575	s__uncultured_bacterium_g__GCA-900066575	ASV1991	0	0	0	10	0	0	0	0	0	0	0	0	0	0	0	0	0	0	0	0	8	0	0	0
d__Bacteria	k__norank_d__Bacteria	p__Bacteroidota	c__Bacteroidia	o__Bacteroidales	f__Muribaculaceae	g__norank_f__Muribaculaceae	s__uncultured_bacterium_g__norank_f__Muribaculaceae	ASV2985	0	0	0	0	0	0	0	0	0	0	0	0	0	0	0	0	10	0	0	0	0	0	0	0
d__Bacteria	k__norank_d__Bacteria	p__Firmicutes	c__Clostridia	o__Oscillospirales	f__Oscillospiraceae	g__unclassified_f__Oscillospiraceae	s__unclassified_f__Oscillospiraceae	ASV97	0	0	0	0	0	0	0	0	0	0	0	50	0	0	0	7	0	0	0	0	0	0	0	0
d__Bacteria	k__norank_d__Bacteria	p__Firmicutes	c__Clostridia	o__Clostridia_UCG-014	f__norank_o__Clostridia_UCG-014	g__norank_f__norank_o__Clostridia_UCG-014	s__unclassified_g__norank_f__norank_o__Clostridia_UCG-014	ASV2283	0	0	55	0	0	0	0	0	0	0	0	0	0	0	0	0	0	0	0	0	0	0	0	0
d__Bacteria	k__norank_d__Bacteria	p__Firmicutes	c__Clostridia	o__Clostridia_UCG-014	f__norank_o__Clostridia_UCG-014	g__norank_f__norank_o__Clostridia_UCG-014	s__unclassified_g__norank_f__norank_o__Clostridia_UCG-014	ASV2288	0	0	35	0	0	0	0	0	0	0	0	0	0	0	0	0	0	0	0	0	17	0	0	0
d__Bacteria	k__norank_d__Bacteria	p__Firmicutes	c__Clostridia	o__Oscillospirales	f__Ruminococcaceae	g__Fournierella	s__unclassified_g__Fournierella	ASV885	0	0	0	0	0	0	0	0	0	0	0	0	0	0	0	0	0	0	0	0	0	6	0	6
d__Bacteria	k__norank_d__Bacteria	p__Firmicutes	c__Clostridia	o__Monoglobales	f__Monoglobaceae	g__Monoglobus	s__uncultured_bacterium_g__Monoglobus	ASV2886	0	0	0	0	0	0	0	0	0	0	0	0	0	0	0	0	0	2	0	0	0	0	0	0
d__Bacteria	k__norank_d__Bacteria	p__Firmicutes	c__Clostridia	o__Clostridia_UCG-014	f__norank_o__Clostridia_UCG-014	g__norank_f__norank_o__Clostridia_UCG-014	s__unclassified_g__norank_f__norank_o__Clostridia_UCG-014	ASV2758	0	0	0	0	0	0	0	26	0	0	0	0	0	0	0	0	0	0	0	0	0	0	0	0
d__Bacteria	k__norank_d__Bacteria	p__Firmicutes	c__Clostridia	o__Lachnospirales	f__Lachnospiraceae	g__unclassified_f__Lachnospiraceae	s__unclassified_f__Lachnospiraceae	ASV1077	17	21	64	47	0	16	0	61	123	15	0	0	19	0	15	0	19	21	27	13	21	43	0	0
d__Bacteria	k__norank_d__Bacteria	p__Firmicutes	c__Clostridia	o__Peptococcales	f__Peptococcaceae	g__Peptococcus	s__uncultured_bacterium_g__Peptococcus	ASV1849	0	0	0	0	0	0	0	0	0	0	0	0	0	0	9	0	0	0	0	0	0	20	0	0
d__Bacteria	k__norank_d__Bacteria	p__Firmicutes	c__Bacilli	o__Lactobacillales	f__Lactobacillaceae	g__Lactobacillus	s__unclassified_g__Lactobacillus	ASV1820	0	0	0	0	0	0	0	0	61	0	0	0	0	0	60	0	0	0	0	0	47	44	0	0
d__Bacteria	k__norank_d__Bacteria	p__Firmicutes	c__Clostridia	o__Peptostreptococcales-Tissierellales	f__Anaerovoracaceae	g__Family_XIII_UCG-001	s__uncultured_bacterium_g__Family_XIII_UCG-001	ASV1582	0	0	0	0	0	0	10	0	0	0	0	0	0	9	0	0	0	0	4	0	2	0	0	0
d__Bacteria	k__norank_d__Bacteria	p__Firmicutes	c__Clostridia	o__Clostridia_UCG-014	f__norank_o__Clostridia_UCG-014	g__norank_f__norank_o__Clostridia_UCG-014	s__unclassified_g__norank_f__norank_o__Clostridia_UCG-014	ASV533	0	0	0	0	0	0	0	0	9	0	0	0	0	0	0	12	0	0	0	0	17	0	0	0
d__Bacteria	k__norank_d__Bacteria	p__Bacteroidota	c__Bacteroidia	o__Bacteroidales	f__Muribaculaceae	g__norank_f__Muribaculaceae	s__unclassified_g__norank_f__Muribaculaceae	ASV2322	0	0	11	0	0	0	0	0	0	0	21	0	0	0	0	0	0	0	0	0	0	0	0	0
d__Bacteria	k__norank_d__Bacteria	p__Firmicutes	c__Clostridia	o__Lachnospirales	f__Lachnospiraceae	g__A2	s__uncultured_bacterium_g__A2	ASV2738	0	0	0	0	0	0	0	0	0	0	0	0	0	0	0	7	0	0	0	0	0	0	0	0
d__Bacteria	k__norank_d__Bacteria	p__Firmicutes	c__Bacilli	o__RF39	f__norank_o__RF39	g__norank_f__norank_o__RF39	s__unclassified_g__norank_f__norank_o__RF39	ASV2099	0	0	0	0	0	0	0	0	0	5	0	0	0	0	0	0	0	0	0	0	0	0	0	0
d__Bacteria	k__norank_d__Bacteria	p__Firmicutes	c__Clostridia	o__Clostridia_UCG-014	f__norank_o__Clostridia_UCG-014	g__norank_f__norank_o__Clostridia_UCG-014	s__unclassified_g__norank_f__norank_o__Clostridia_UCG-014	ASV1003	15	0	5	7	0	0	0	0	0	0	0	0	0	0	0	0	0	4	0	0	10	5	0	0
d__Bacteria	k__norank_d__Bacteria	p__Spirochaetota	c__Spirochaetia	o__Spirochaetales	f__Spirochaetaceae	g__Treponema	s__unclassified_g__Treponema	ASV336	79	69	0	24	6	158	3	265	6	53	0	2	31	0	12	6	38	0	48	33	4	122	0	546
d__Bacteria	k__norank_d__Bacteria	p__Bacteroidota	c__Bacteroidia	o__Bacteroidales	f__Muribaculaceae	g__norank_f__Muribaculaceae	s__unclassified_g__norank_f__Muribaculaceae	ASV1457	31	0	14	0	0	0	0	0	0	0	0	9	0	0	6	0	0	29	83	12	0	0	26	0
d__Bacteria	k__norank_d__Bacteria	p__Firmicutes	c__Clostridia	o__Oscillospirales	f__Butyricicoccaceae	g__Butyricicoccus	s__uncultured_bacterium_g__Butyricicoccus	ASV745	11	11	15	18	0	0	0	32	4	19	0	0	0	0	0	0	10	0	0	0	0	0	0	21
d__Bacteria	k__norank_d__Bacteria	p__Firmicutes	c__Clostridia	o__Clostridia_UCG-014	f__norank_o__Clostridia_UCG-014	g__norank_f__norank_o__Clostridia_UCG-014	s__unclassified_g__norank_f__norank_o__Clostridia_UCG-014	ASV843	0	0	61	39	0	0	22	15	0	0	0	43	0	0	0	0	0	0	0	26	43	0	22	7
d__Bacteria	k__norank_d__Bacteria	p__Cyanobacteria	c__Vampirivibrionia	o__Gastranaerophilales	f__norank_o__Gastranaerophilales	g__norank_f__norank_o__Gastranaerophilales	s__unclassified_g__norank_f__norank_o__Gastranaerophilales	ASV1595	0	0	0	0	0	0	0	3	3	2	3	9	0	0	0	3	0	0	2	0	0	0	0	0
d__Bacteria	k__norank_d__Bacteria	p__Firmicutes	c__Clostridia	o__Oscillospirales	f__Ruminococcaceae	g__CAG-352	s__uncultured_bacterium_g__CAG-352	ASV2819	0	0	0	0	0	0	0	0	0	0	0	0	0	0	114	0	0	0	0	0	0	0	0	0
d__Bacteria	k__norank_d__Bacteria	p__Firmicutes	c__Clostridia	o__Oscillospirales	f__Oscillospiraceae	g__unclassified_f__Oscillospiraceae	s__unclassified_f__Oscillospiraceae	ASV1564	13	0	33	0	0	0	0	0	0	0	0	21	0	0	0	0	0	0	7	0	0	0	0	0
d__Bacteria	k__norank_d__Bacteria	p__Firmicutes	c__Clostridia	o__Clostridia_UCG-014	f__norank_o__Clostridia_UCG-014	g__norank_f__norank_o__Clostridia_UCG-014	s__unclassified_g__norank_f__norank_o__Clostridia_UCG-014	ASV339	0	0	0	0	0	0	0	0	0	0	6	0	0	0	0	3	0	0	0	0	0	0	0	0
d__Bacteria	k__norank_d__Bacteria	p__Bacteroidota	c__Bacteroidia	o__Bacteroidales	f__Muribaculaceae	g__norank_f__Muribaculaceae	s__uncultured_bacterium_g__norank_f__Muribaculaceae	ASV3040	32	0	0	0	0	0	0	0	0	0	0	0	0	0	0	0	0	0	0	0	0	0	0	0
d__Bacteria	k__norank_d__Bacteria	p__Firmicutes	c__Bacilli	o__Lactobacillales	f__Lactobacillaceae	g__Lactobacillus	s__unclassified_g__Lactobacillus	ASV1915	0	0	0	0	0	3	0	0	0	0	0	0	0	3	0	0	0	0	0	0	0	1	0	0
d__Bacteria	k__norank_d__Bacteria	p__Firmicutes	c__Clostridia	o__Monoglobales	f__Monoglobaceae	g__Monoglobus	s__unclassified_g__Monoglobus	ASV3021	0	0	0	0	0	0	0	0	0	0	0	6	0	0	0	0	0	0	0	0	0	0	0	0
d__Bacteria	k__norank_d__Bacteria	p__Firmicutes	c__Clostridia	o__Oscillospirales	f__Oscillospiraceae	g__NK4A214_group	s__unclassified_g__NK4A214_group	ASV1714	0	0	11	0	0	0	0	0	0	0	0	0	0	0	0	0	0	0	0	0	0	0	0	0
d__Bacteria	k__norank_d__Bacteria	p__Bacteroidota	c__Bacteroidia	o__Bacteroidales	f__Muribaculaceae	g__norank_f__Muribaculaceae	s__unclassified_g__norank_f__Muribaculaceae	ASV1215	16	0	11	29	6	23	39	0	0	0	6	9	0	24	0	0	60	0	5	0	47	20	12	0
d__Bacteria	k__norank_d__Bacteria	p__Firmicutes	c__Clostridia	o__Oscillospirales	f__Eubacterium_coprostanoligenes_group	g__norank_f__Eubacterium_coprostanoligenes_group	s__uncultured_bacterium_g__norank_f__Eubacterium_coprostanoligenes_group	ASV2732	0	0	0	0	0	0	0	0	0	0	0	0	0	0	0	10	0	0	0	0	0	0	0	0
d__Bacteria	k__norank_d__Bacteria	p__Firmicutes	c__Clostridia	o__Lachnospirales	f__Lachnospiraceae	g__unclassified_f__Lachnospiraceae	s__unclassified_f__Lachnospiraceae	ASV2257	0	0	0	0	0	0	0	0	0	0	0	0	0	23	0	0	0	0	0	0	0	0	0	0
d__Bacteria	k__norank_d__Bacteria	p__Bacteroidota	c__Bacteroidia	o__Bacteroidales	f__Muribaculaceae	g__norank_f__Muribaculaceae	s__unclassified_g__norank_f__Muribaculaceae	ASV1210	0	9	0	0	8	0	4	0	0	0	0	0	0	0	0	0	4	0	0	35	0	0	0	0
d__Bacteria	k__norank_d__Bacteria	p__Bacteroidota	c__Bacteroidia	o__Bacteroidales	f__Muribaculaceae	g__norank_f__Muribaculaceae	s__unclassified_g__norank_f__Muribaculaceae	ASV2929	0	0	0	0	0	0	0	0	0	0	0	0	3	0	0	0	0	0	0	0	0	0	0	0
d__Bacteria	k__norank_d__Bacteria	p__Actinobacteriota	c__Coriobacteriia	o__Coriobacteriales	f__Eggerthellaceae	g__Enterorhabdus	s__uncultured_bacterium_g__Enterorhabdus	ASV1090	0	0	1	0	0	0	0	7	0	0	0	0	0	0	0	3	0	0	0	4	0	0	0	0
d__Bacteria	k__norank_d__Bacteria	p__Bacteroidota	c__Bacteroidia	o__Bacteroidales	f__Muribaculaceae	g__norank_f__Muribaculaceae	s__uncultured_bacterium_g__norank_f__Muribaculaceae	ASV3044	28	0	0	0	0	0	0	0	0	0	0	0	0	0	0	0	0	0	0	0	0	0	0	0
d__Bacteria	k__norank_d__Bacteria	p__Firmicutes	c__Bacilli	o__Bacillales	f__Bacillaceae	g__Bacillus	s__Lactobacillus_vaginalis_g__Bacillus	ASV2251	0	29	0	0	0	0	0	0	0	0	31	0	0	30	0	0	0	0	0	0	0	0	0	0
d__Bacteria	k__norank_d__Bacteria	p__Firmicutes	c__Clostridia	o__Lachnospirales	f__Lachnospiraceae	g__Roseburia	s__uncultured_bacterium_g__Roseburia	ASV2779	0	0	0	0	0	0	0	6	0	0	0	0	0	0	0	0	0	0	0	0	0	0	0	0
d__Bacteria	k__norank_d__Bacteria	p__Bacteroidota	c__Bacteroidia	o__Bacteroidales	f__Muribaculaceae	g__norank_f__Muribaculaceae	s__uncultured_bacterium_g__norank_f__Muribaculaceae	ASV23	12	0	58	4	0	0	0	0	0	0	0	0	0	0	0	0	0	12	14	0	0	19	23	0
d__Bacteria	k__norank_d__Bacteria	p__Bacteroidota	c__Bacteroidia	o__Bacteroidales	f__Prevotellaceae	g__unclassified_f__Prevotellaceae	s__unclassified_f__Prevotellaceae	ASV1528	28	0	0	0	0	0	0	0	0	0	0	0	0	0	0	4	0	0	14	0	0	24	0	0
d__Bacteria	k__norank_d__Bacteria	p__Bacteroidota	c__Bacteroidia	o__Bacteroidales	f__Muribaculaceae	g__norank_f__Muribaculaceae	s__uncultured_bacterium_g__norank_f__Muribaculaceae	ASV27	0	20	42	53	0	110	26	19	51	163	26	0	15	67	0	0	0	0	56	143	0	32	0	0
d__Bacteria	k__norank_d__Bacteria	p__Firmicutes	c__Bacilli	o__Bacillales	f__Bacillaceae	g__Bacillus	s__Lactobacillus_vaginalis_g__Bacillus	ASV2661	0	0	0	0	0	0	0	0	0	0	0	0	0	0	0	0	0	0	0	0	39	0	0	0
d__Bacteria	k__norank_d__Bacteria	p__Bacteroidota	c__Bacteroidia	o__Bacteroidales	f__Muribaculaceae	g__norank_f__Muribaculaceae	s__uncultured_bacterium_g__norank_f__Muribaculaceae	ASV752	0	6	20	17	0	0	13	0	0	0	0	14	0	0	0	10	0	17	2	0	14	0	0	15
d__Bacteria	k__norank_d__Bacteria	p__Bacteroidota	c__Bacteroidia	o__Bacteroidales	f__Muribaculaceae	g__norank_f__Muribaculaceae	s__uncultured_bacterium_g__norank_f__Muribaculaceae	ASV751	10	9	0	0	5	14	5	16	0	8	6	0	17	10	22	0	6	0	0	0	12	0	2	17
d__Bacteria	k__norank_d__Bacteria	p__Firmicutes	c__Clostridia	o__Lachnospirales	f__Lachnospiraceae	g__unclassified_f__Lachnospiraceae	s__unclassified_f__Lachnospiraceae	ASV2347	0	0	4	0	0	0	0	0	0	0	0	0	0	0	0	0	0	0	0	0	0	0	0	0
d__Bacteria	k__norank_d__Bacteria	p__Bacteroidota	c__Bacteroidia	o__Bacteroidales	f__Muribaculaceae	g__norank_f__Muribaculaceae	s__uncultured_bacterium_g__norank_f__Muribaculaceae	ASV305	7	1	0	7	0	8	0	4	13	4	23	3	5	0	0	5	0	18	0	18	14	5	13	5
d__Bacteria	k__norank_d__Bacteria	p__Firmicutes	c__Clostridia	o__Lachnospirales	f__Lachnospiraceae	g__Lachnospiraceae_NK4A136_group	s__unclassified_g__Lachnospiraceae_NK4A136_group	ASV2525	0	0	0	0	0	21	0	0	0	0	0	0	0	0	0	0	0	0	0	0	0	0	0	0
d__Bacteria	k__norank_d__Bacteria	p__Bacteroidota	c__Bacteroidia	o__Bacteroidales	f__Muribaculaceae	g__norank_f__Muribaculaceae	s__unclassified_g__norank_f__Muribaculaceae	ASV730	0	20	0	2	0	0	0	25	4	32	0	22	0	0	0	0	8	0	0	24	9	0	16	21
d__Bacteria	k__norank_d__Bacteria	p__Firmicutes	c__Clostridia	o__Lachnospirales	f__Lachnospiraceae	g__Lachnospiraceae_NK4A136_group	s__unclassified_g__Lachnospiraceae_NK4A136_group	ASV3035	48	0	0	0	0	0	0	0	0	0	0	0	0	0	0	0	0	0	0	0	0	0	0	0
d__Bacteria	k__norank_d__Bacteria	p__Firmicutes	c__Clostridia	o__Lachnospirales	f__Lachnospiraceae	g__unclassified_f__Lachnospiraceae	s__unclassified_f__Lachnospiraceae	ASV1805	0	0	0	0	0	18	0	0	28	0	0	0	0	21	0	0	47	0	0	104	0	165	0	0
d__Bacteria	k__norank_d__Bacteria	p__Firmicutes	c__Clostridia	o__Lachnospirales	f__Lachnospiraceae	g__unclassified_f__Lachnospiraceae	s__unclassified_f__Lachnospiraceae	ASV1804	0	0	0	0	0	0	0	0	0	0	0	0	0	0	0	0	0	0	0	0	0	186	0	0
d__Bacteria	k__norank_d__Bacteria	p__Firmicutes	c__Clostridia	o__Lachnospirales	f__Lachnospiraceae	g__unclassified_f__Lachnospiraceae	s__unclassified_f__Lachnospiraceae	ASV1808	0	18	11	0	0	0	0	39	15	0	0	0	0	0	0	0	0	34	0	0	0	80	0	0
d__Bacteria	k__norank_d__Bacteria	p__Firmicutes	c__Bacilli	o__RF39	f__norank_o__RF39	g__norank_f__norank_o__RF39	s__uncultured_bacterium_g__norank_f__norank_o__RF39	ASV2876	0	0	0	0	0	0	0	0	0	0	0	0	0	0	0	0	0	5	0	0	0	0	0	0
d__Bacteria	k__norank_d__Bacteria	p__Firmicutes	c__Clostridia	o__Lachnospirales	f__Lachnospiraceae	g__Blautia	s__uncultured_Eubacteriaceae_bacterium_g__Blautia	ASV2983	0	0	0	0	0	0	0	0	0	0	0	0	0	0	0	0	9	0	0	0	0	0	0	0
d__Bacteria	k__norank_d__Bacteria	p__Bacteroidota	c__Bacteroidia	o__Bacteroidales	f__Muribaculaceae	g__norank_f__Muribaculaceae	s__uncultured_bacterium_g__norank_f__Muribaculaceae	ASV1481	0	32	33	30	0	28	0	20	0	0	10	18	0	0	0	70	0	77	35	0	111	28	29	0
d__Bacteria	k__norank_d__Bacteria	p__Firmicutes	c__Clostridia	o__Lachnospirales	f__Lachnospiraceae	g__unclassified_f__Lachnospiraceae	s__unclassified_f__Lachnospiraceae	ASV2314	0	0	12	0	0	0	7	0	0	0	0	0	2	0	0	0	12	0	0	0	0	0	0	0
d__Bacteria	k__norank_d__Bacteria	p__Firmicutes	c__Clostridia	o__Clostridia_UCG-014	f__norank_o__Clostridia_UCG-014	g__norank_f__norank_o__Clostridia_UCG-014	s__unclassified_g__norank_f__norank_o__Clostridia_UCG-014	ASV1826	0	0	14	0	0	18	8	0	0	0	0	18	0	12	0	0	0	0	0	0	27	34	0	0
d__Bacteria	k__norank_d__Bacteria	p__Firmicutes	c__Clostridia	o__Lachnospirales	f__Lachnospiraceae	g__Roseburia	s__unclassified_g__Roseburia	ASV915	0	0	0	0	0	0	0	0	3	0	0	3	0	0	0	0	0	0	0	0	0	0	0	3
d__Bacteria	k__norank_d__Bacteria	p__Firmicutes	c__Clostridia	o__Lachnospirales	f__Lachnospiraceae	g__unclassified_f__Lachnospiraceae	s__unclassified_f__Lachnospiraceae	ASV1487	0	0	0	0	0	0	0	0	0	0	0	0	0	0	0	0	0	0	37	0	0	0	0	0
d__Bacteria	k__norank_d__Bacteria	p__Firmicutes	c__Clostridia	o__Lachnospirales	f__Lachnospiraceae	g__unclassified_f__Lachnospiraceae	s__unclassified_f__Lachnospiraceae	ASV1483	0	0	0	0	0	0	0	0	0	0	0	0	0	0	0	0	0	0	38	0	0	0	0	0
d__Bacteria	k__norank_d__Bacteria	p__Firmicutes	c__Clostridia	o__Lachnospirales	f__Lachnospiraceae	g__unclassified_f__Lachnospiraceae	s__unclassified_f__Lachnospiraceae	ASV1489	0	0	0	59	0	0	0	0	0	0	0	0	0	0	52	0	0	0	30	0	0	0	0	0
d__Bacteria	k__norank_d__Bacteria	p__Firmicutes	c__Clostridia	o__Lachnospirales	f__Lachnospiraceae	g__Lachnospiraceae_NK4A136_group	s__unclassified_g__Lachnospiraceae_NK4A136_group	ASV2457	0	0	0	0	0	0	0	0	0	0	21	0	0	0	0	0	0	0	0	0	0	0	0	0
d__Bacteria	k__norank_d__Bacteria	p__Bacteroidota	c__Bacteroidia	o__Bacteroidales	f__Muribaculaceae	g__norank_f__Muribaculaceae	s__uncultured_bacterium_g__norank_f__Muribaculaceae	ASV2697	0	0	0	0	0	0	0	0	0	0	0	0	0	0	0	0	0	0	0	0	1	0	0	0
d__Bacteria	k__norank_d__Bacteria	p__Firmicutes	c__Clostridia	o__Clostridia_vadinBB60_group	f__norank_o__Clostridia_vadinBB60_group	g__norank_f__norank_o__Clostridia_vadinBB60_group	s__uncultured_bacterium_g__norank_f__norank_o__Clostridia_vadinBB60_group	ASV1914	0	0	0	0	0	0	4	0	0	0	0	0	0	0	0	0	0	0	0	0	0	2	0	0
d__Bacteria	k__norank_d__Bacteria	p__Firmicutes	c__Bacilli	o__Lactobacillales	f__Lactobacillaceae	g__Lactobacillus	s__unclassified_g__Lactobacillus	ASV2921	0	0	0	0	0	0	0	0	0	0	0	0	7	0	0	0	0	0	0	0	0	0	0	0
d__Bacteria	k__norank_d__Bacteria	p__Firmicutes	c__Bacilli	o__Lactobacillales	f__Lactobacillaceae	g__Lactobacillus	s__unclassified_g__Lactobacillus	ASV2927	0	0	0	0	0	0	0	0	0	0	0	0	3	0	0	0	0	0	0	0	0	0	0	0
d__Bacteria	k__norank_d__Bacteria	p__Actinobacteriota	c__Coriobacteriia	o__Coriobacteriales	f__Eggerthellaceae	g__Enterorhabdus	s__uncultured_bacterium_g__Enterorhabdus	ASV1678	0	0	0	10	0	0	9	0	0	0	0	0	0	0	3	0	8	0	0	5	7	0	25	0
d__Bacteria	k__norank_d__Bacteria	p__Bacteroidota	c__Bacteroidia	o__Bacteroidales	f__Muribaculaceae	g__norank_f__Muribaculaceae	s__uncultured_bacterium_g__norank_f__Muribaculaceae	ASV1184	0	21	44	0	19	0	14	17	13	17	65	70	10	0	26	67	15	32	44	0	0	0	77	0
d__Bacteria	k__norank_d__Bacteria	p__Bacteroidota	c__Bacteroidia	o__Bacteroidales	f__Muribaculaceae	g__norank_f__Muribaculaceae	s__uncultured_bacterium_g__norank_f__Muribaculaceae	ASV1186	0	34	4	0	17	0	33	0	19	0	31	0	0	0	24	17	26	29	37	0	0	69	49	0
d__Bacteria	k__norank_d__Bacteria	p__Bacteroidota	c__Bacteroidia	o__Bacteroidales	f__Muribaculaceae	g__norank_f__Muribaculaceae	s__uncultured_bacterium_g__norank_f__Muribaculaceae	ASV1180	118	0	0	0	20	12	17	0	106	0	0	19	11	63	73	0	7	22	14	62	0	16	22	0
d__Bacteria	k__norank_d__Bacteria	p__Firmicutes	c__Clostridia	o__Lachnospirales	f__Lachnospiraceae	g__unclassified_f__Lachnospiraceae	s__unclassified_f__Lachnospiraceae	ASV941	0	24	0	0	0	11	0	0	26	36	37	0	0	19	0	19	0	0	49	0	14	33	0	0
d__Bacteria	k__norank_d__Bacteria	p__Firmicutes	c__Clostridia	o__Lachnospirales	f__Lachnospiraceae	g__unclassified_f__Lachnospiraceae	s__unclassified_f__Lachnospiraceae	ASV766	0	0	0	0	0	0	0	0	0	0	0	0	0	0	0	0	0	0	0	0	0	0	0	16
d__Bacteria	k__norank_d__Bacteria	p__Firmicutes	c__Clostridia	o__Oscillospirales	f__Ruminococcaceae	g__Ruminococcus	s__unclassified_g__Ruminococcus	ASV495	0	0	13	208	134	0	90	0	0	0	0	0	23	0	7	0	14	0	0	0	0	0	0	705
d__Bacteria	k__norank_d__Bacteria	p__Firmicutes	c__Clostridia	o__Lachnospirales	f__Lachnospiraceae	g__unclassified_f__Lachnospiraceae	s__unclassified_f__Lachnospiraceae	ASV1919	0	0	45	71	0	0	0	0	0	0	0	0	6	0	48	0	5	27	0	0	28	0	19	0
d__Bacteria	k__norank_d__Bacteria	p__Firmicutes	c__Clostridia	o__Lachnospirales	f__Lachnospiraceae	g__Eubacterium_xylanophilum_group	s__uncultured_bacterium_g__Eubacterium_xylanophilum_group	ASV670	0	42	0	0	0	0	0	0	20	0	0	0	0	0	0	31	0	0	0	0	0	0	53	36
d__Bacteria	k__norank_d__Bacteria	p__Firmicutes	c__Clostridia	o__Lachnospirales	f__Lachnospiraceae	g__unclassified_f__Lachnospiraceae	s__unclassified_f__Lachnospiraceae	ASV2236	0	0	0	0	0	0	14	0	0	0	0	0	0	0	0	0	12	0	0	4	0	0	0	0
d__Bacteria	k__norank_d__Bacteria	p__Firmicutes	c__Clostridia	o__Lachnospirales	f__Lachnospiraceae	g__unclassified_f__Lachnospiraceae	s__unclassified_f__Lachnospiraceae	ASV2235	0	0	9	0	0	0	0	0	0	0	0	0	0	0	0	0	0	0	0	4	0	0	0	0
d__Bacteria	k__norank_d__Bacteria	p__Firmicutes	c__Clostridia	o__Lachnospirales	f__Lachnospiraceae	g__unclassified_f__Lachnospiraceae	s__unclassified_f__Lachnospiraceae	ASV2233	0	0	0	0	0	0	0	0	0	0	0	0	0	0	0	0	0	0	0	5	0	0	0	0
d__Bacteria	k__norank_d__Bacteria	p__Bacteroidota	c__Bacteroidia	o__Bacteroidales	f__Muribaculaceae	g__norank_f__Muribaculaceae	s__uncultured_bacterium_g__norank_f__Muribaculaceae	ASV628	98	14	18	52	36	71	54	18	40	23	28	36	43	46	36	40	70	7	22	59	39	61	21	66
d__Bacteria	k__norank_d__Bacteria	p__Bacteroidota	c__Bacteroidia	o__Bacteroidales	f__Muribaculaceae	g__norank_f__Muribaculaceae	s__uncultured_bacterium_g__norank_f__Muribaculaceae	ASV626	68	79	8	22	48	64	32	63	142	68	31	50	52	75	66	92	40	67	99	145	74	51	136	82
d__Bacteria	k__norank_d__Bacteria	p__Bacteroidota	c__Bacteroidia	o__Bacteroidales	f__Rikenellaceae	g__Rikenella	s__uncultured_bacterium_g__Rikenella	ASV1902	5	0	0	3	0	0	0	0	4	0	0	0	0	0	0	3	0	0	0	0	7	3	0	0
d__Bacteria	k__norank_d__Bacteria	p__Bacteroidota	c__Bacteroidia	o__Bacteroidales	f__Muribaculaceae	g__norank_f__Muribaculaceae	s__unclassified_g__norank_f__Muribaculaceae	ASV22	36	22	0	18	20	28	37	0	56	47	105	77	26	0	49	52	29	67	29	140	40	0	43	0
d__Bacteria	k__norank_d__Bacteria	p__Proteobacteria	c__Alphaproteobacteria	o__Rhizobiales	f__Rhizobiaceae	g__unclassified_f__Rhizobiaceae	s__unclassified_f__Rhizobiaceae	ASV2744	0	0	0	0	0	0	0	0	0	0	0	0	0	0	0	2	0	0	0	0	0	0	0	0
d__Bacteria	k__norank_d__Bacteria	p__Bacteroidota	c__Bacteroidia	o__Bacteroidales	f__Muribaculaceae	g__norank_f__Muribaculaceae	s__uncultured_bacterium_g__norank_f__Muribaculaceae	ASV1500	0	0	0	26	0	24	57	0	17	34	0	0	0	0	34	0	0	30	27	0	0	0	0	0
d__Bacteria	k__norank_d__Bacteria	p__Bacteroidota	c__Bacteroidia	o__Bacteroidales	f__Muribaculaceae	g__norank_f__Muribaculaceae	s__uncultured_bacterium_g__norank_f__Muribaculaceae	ASV1502	0	30	0	0	0	0	0	35	0	0	0	0	0	25	0	0	0	19	22	0	0	0	0	0
d__Bacteria	k__norank_d__Bacteria	p__Bacteroidota	c__Bacteroidia	o__Bacteroidales	f__Muribaculaceae	g__norank_f__Muribaculaceae	s__uncultured_bacterium_g__norank_f__Muribaculaceae	ASV1506	0	0	0	0	0	0	0	0	20	0	0	0	0	0	0	0	0	0	26	0	0	0	0	0
d__Bacteria	k__norank_d__Bacteria	p__Firmicutes	c__Clostridia	o__Oscillospirales	f__Butyricicoccaceae	g__UCG-009	s__uncultured_organism_g__UCG-009	ASV547	5	14	14	15	5	0	2	24	10	7	0	2	0	3	8	0	12	17	0	0	0	0	6	13
d__Bacteria	k__norank_d__Bacteria	p__Firmicutes	c__Bacilli	o__RF39	f__norank_o__RF39	g__norank_f__norank_o__RF39	s__uncultured_bacterium_g__norank_f__norank_o__RF39	ASV1778	0	0	0	0	0	0	0	0	0	0	0	0	0	2	0	0	0	0	0	0	0	0	0	0
d__Bacteria	k__norank_d__Bacteria	p__Firmicutes	c__Clostridia	o__Lachnospirales	f__Lachnospiraceae	g__Lachnospiraceae_NK4A136_group	s__unclassified_g__Lachnospiraceae_NK4A136_group	ASV2700	86	0	0	0	0	0	0	0	0	0	0	0	0	0	0	51	26	19	0	0	0	0	0	0
d__Bacteria	k__norank_d__Bacteria	p__Firmicutes	c__Clostridia	o__Oscillospirales	f__UCG-010	g__norank_f__UCG-010	s__uncultured_bacterium_g__norank_f__UCG-010	ASV357	0	0	0	0	0	0	0	0	0	0	0	2	0	3	0	0	0	0	0	0	0	2	2	0
d__Bacteria	k__norank_d__Bacteria	p__Firmicutes	c__Clostridia	o__Lachnospirales	f__Lachnospiraceae	g__Eubacterium_xylanophilum_group	s__uncultured_bacterium_g__Eubacterium_xylanophilum_group	ASV1196	0	0	38	87	13	39	0	0	0	0	0	0	0	0	0	0	0	0	0	49	33	0	40	0
d__Bacteria	k__norank_d__Bacteria	p__Bacteroidota	c__Bacteroidia	o__Bacteroidales	f__Rikenellaceae	g__Alistipes	s__uncultured_bacterium_g__Alistipes	ASV1645	0	5	0	0	0	0	0	0	0	0	0	0	0	0	0	0	0	0	0	0	0	0	0	0
d__Bacteria	k__norank_d__Bacteria	p__Firmicutes	c__Clostridia	o__Lachnospirales	f__Lachnospiraceae	g__unclassified_f__Lachnospiraceae	s__unclassified_f__Lachnospiraceae	ASV2692	0	0	0	0	0	0	5	0	0	0	0	0	0	0	0	0	0	0	0	0	1	0	0	0
d__Bacteria	k__norank_d__Bacteria	p__Firmicutes	c__Clostridia	o__unclassified_c__Clostridia	f__unclassified_c__Clostridia	g__unclassified_c__Clostridia	s__unclassified_c__Clostridia	ASV3029	0	0	0	0	0	0	0	0	0	0	0	2	0	0	0	0	0	0	0	0	0	0	0	0
d__Bacteria	k__norank_d__Bacteria	p__Firmicutes	c__Bacilli	o__Lactobacillales	f__Lactobacillaceae	g__Lactobacillus	s__unclassified_g__Lactobacillus	ASV2813	0	0	0	0	0	0	0	0	0	0	0	0	0	0	0	0	0	0	0	0	0	0	4	0
d__Bacteria	k__norank_d__Bacteria	p__Firmicutes	c__Clostridia	o__Oscillospirales	f__Oscillospiraceae	g__Oscillibacter	s__uncultured_bacterium_g__Oscillibacter	ASV2350	0	0	3	0	0	0	0	0	0	0	0	0	0	0	0	0	0	0	0	0	0	0	0	0
d__Bacteria	k__norank_d__Bacteria	p__Firmicutes	c__Clostridia	o__Lachnospirales	f__Lachnospiraceae	g__Lachnospiraceae_NK4A136_group	s__Lachnospiraceae_bacterium_COE1	ASV2762	0	0	0	0	0	0	0	21	0	0	0	0	0	0	0	0	0	0	0	0	0	0	0	0
d__Bacteria	k__norank_d__Bacteria	p__Bacteroidota	c__Bacteroidia	o__Bacteroidales	f__Muribaculaceae	g__norank_f__Muribaculaceae	s__unclassified_g__norank_f__Muribaculaceae	ASV2319	0	0	13	0	0	0	0	0	0	0	0	0	0	0	0	2	0	15	0	0	0	0	0	0
d__Bacteria	k__norank_d__Bacteria	p__Proteobacteria	c__Alphaproteobacteria	o__Paracaedibacterales	f__Paracaedibacteraceae	g__norank_f__Paracaedibacteraceae	s__uncultured_Alphaproteobacteria_bacterium_g__norank_f__Paracaedibacteraceae	ASV866	0	18	6	7	0	8	0	13	0	0	3	0	0	0	4	6	9	6	2	0	0	7	26	7
d__Bacteria	k__norank_d__Bacteria	p__Firmicutes	c__Clostridia	o__Lachnospirales	f__Lachnospiraceae	g__Blautia	s__unclassified_g__Blautia	ASV2294	4	40	26	0	0	47	0	0	20	0	0	0	34	0	0	0	0	13	0	0	0	0	14	0
d__Bacteria	k__norank_d__Bacteria	p__Firmicutes	c__Bacilli	o__RF39	f__norank_o__RF39	g__norank_f__norank_o__RF39	s__unclassified_g__norank_f__norank_o__RF39	ASV2240	0	0	6	0	0	8	0	0	0	0	0	0	0	0	0	0	3	0	0	3	0	0	0	0
d__Bacteria	k__norank_d__Bacteria	p__Bacteroidota	c__Bacteroidia	o__Bacteroidales	f__Rikenellaceae	g__Alistipes	s__uncultured_bacterium_g__Alistipes	ASV790	0	11	0	0	23	4	6	14	0	15	0	0	0	0	0	10	8	0	9	0	0	71	2	14
d__Bacteria	k__norank_d__Bacteria	p__Bacteroidota	c__Bacteroidia	o__Bacteroidales	f__Muribaculaceae	g__norank_f__Muribaculaceae	s__unclassified_g__norank_f__Muribaculaceae	ASV2797	0	0	0	0	0	0	0	0	0	0	0	0	0	0	26	0	0	0	0	0	0	0	37	0
d__Bacteria	k__norank_d__Bacteria	p__Bacteroidota	c__Bacteroidia	o__Bacteroidales	f__Muribaculaceae	g__norank_f__Muribaculaceae	s__uncultured_bacterium_g__norank_f__Muribaculaceae	ASV2355	0	0	2	0	0	0	0	0	0	0	0	0	0	0	0	0	0	0	0	0	0	0	0	0
d__Bacteria	k__norank_d__Bacteria	p__Firmicutes	c__Clostridia	o__Lachnospirales	f__Lachnospiraceae	g__Lachnospiraceae_NK4A136_group	s__unclassified_g__Lachnospiraceae_NK4A136_group	ASV1154	0	0	0	0	39	0	0	0	0	0	0	0	26	0	39	0	42	0	0	0	0	0	0	0
d__Bacteria	k__norank_d__Bacteria	p__Firmicutes	c__Clostridia	o__Lachnospirales	f__Lachnospiraceae	g__unclassified_f__Lachnospiraceae	s__unclassified_f__Lachnospiraceae	ASV2821	0	0	0	0	0	0	0	0	0	0	0	0	0	0	80	0	0	0	0	0	0	0	0	0
d__Bacteria	k__norank_d__Bacteria	p__Firmicutes	c__Bacilli	o__Lactobacillales	f__Lactobacillaceae	g__Lactobacillus	s__unclassified_g__Lactobacillus	ASV1961	0	0	0	18	0	26	0	0	0	0	0	0	0	0	0	0	0	0	0	0	0	0	0	0
d__Bacteria	k__norank_d__Bacteria	p__Firmicutes	c__Clostridia	o__Lachnospirales	f__Lachnospiraceae	g__Tyzzerella	s__unclassified_g__Tyzzerella	ASV3094	0	0	0	0	0	0	4	0	0	0	0	0	0	0	0	0	0	0	0	0	0	0	0	0
d__Bacteria	k__norank_d__Bacteria	p__Firmicutes	c__Clostridia	o__Lachnospirales	f__Lachnospiraceae	g__unclassified_f__Lachnospiraceae	s__unclassified_f__Lachnospiraceae	ASV570	0	0	0	0	0	0	0	0	0	0	0	0	22	0	0	0	8	0	0	0	0	4	0	0
d__Bacteria	k__norank_d__Bacteria	p__Firmicutes	c__Clostridia	o__Lachnospirales	f__Lachnospiraceae	g__unclassified_f__Lachnospiraceae	s__unclassified_f__Lachnospiraceae	ASV2978	0	0	0	0	0	0	0	0	0	0	0	0	0	0	0	0	14	0	0	0	0	0	0	0
d__Bacteria	k__norank_d__Bacteria	p__Firmicutes	c__Bacilli	o__Bacillales	f__Planococcaceae	g__Sporosarcina	s__Sporosarcina_sp._106	ASV2453	0	0	0	0	0	0	0	0	0	0	22	0	0	0	0	0	0	0	0	0	0	0	0	0
d__Bacteria	k__norank_d__Bacteria	p__Firmicutes	c__Clostridia	o__Lachnospirales	f__Lachnospiraceae	g__unclassified_f__Lachnospiraceae	s__unclassified_f__Lachnospiraceae	ASV2975	0	0	0	0	0	0	0	0	0	0	0	0	0	0	0	0	23	0	0	0	0	0	0	0
d__Bacteria	k__norank_d__Bacteria	p__Firmicutes	c__Clostridia	o__Lachnospirales	f__Lachnospiraceae	g__unclassified_f__Lachnospiraceae	s__unclassified_f__Lachnospiraceae	ASV2976	0	0	0	0	0	0	0	0	0	0	0	0	0	0	0	0	18	0	0	0	0	0	0	0
d__Bacteria	k__norank_d__Bacteria	p__Actinobacteriota	c__Actinobacteria	o__Bifidobacteriales	f__Bifidobacteriaceae	g__Bifidobacterium	s__unclassified_g__Bifidobacterium	ASV265	0	0	0	0	0	0	0	0	0	0	41	34	0	0	0	0	0	15	0	0	0	0	25	0
d__Bacteria	k__norank_d__Bacteria	p__Bacteroidota	c__Bacteroidia	o__Bacteroidales	f__Muribaculaceae	g__norank_f__Muribaculaceae	s__uncultured_bacterium_g__norank_f__Muribaculaceae	ASV2224	0	0	0	0	0	0	8	0	0	0	0	0	0	0	0	0	0	0	0	8	0	0	0	0
d__Bacteria	k__norank_d__Bacteria	p__unclassified_k__norank_d__Bacteria	c__unclassified_k__norank_d__Bacteria	o__unclassified_k__norank_d__Bacteria	f__unclassified_k__norank_d__Bacteria	g__unclassified_k__norank_d__Bacteria	s__unclassified_k__norank_d__Bacteria	ASV2914	0	0	0	0	0	0	0	0	0	0	0	0	39	0	0	0	0	0	0	0	0	0	0	0
d__Bacteria	k__norank_d__Bacteria	p__Bacteroidota	c__Bacteroidia	o__Bacteroidales	f__Muribaculaceae	g__norank_f__Muribaculaceae	s__uncultured_bacterium_g__norank_f__Muribaculaceae	ASV2226	25	0	5	0	0	28	0	0	21	0	6	36	0	27	0	86	5	0	0	7	11	0	0	0
d__Bacteria	k__norank_d__Bacteria	p__Patescibacteria	c__Saccharimonadia	o__Saccharimonadales	f__Saccharimonadaceae	g__Candidatus_Saccharimonas	s__uncultured_bacterium_g__Candidatus_Saccharimonas	ASV645	0	66	0	23	39	47	31	58	28	40	0	81	36	51	21	29	50	23	49	54	35	56	62	50
d__Bacteria	k__norank_d__Bacteria	p__Patescibacteria	c__Saccharimonadia	o__Saccharimonadales	f__Saccharimonadaceae	g__Candidatus_Saccharimonas	s__uncultured_bacterium_g__Candidatus_Saccharimonas	ASV2264	0	0	0	0	0	0	0	0	0	0	0	0	0	13	0	0	0	0	0	0	0	0	0	0
d__Bacteria	k__norank_d__Bacteria	p__Firmicutes	c__Clostridia	o__Oscillospirales	f__Ruminococcaceae	g__Eubacterium_siraeum_group	s__uncultured_bacterium_g__Eubacterium_siraeum_group	ASV1884	0	0	0	0	0	26	0	0	0	80	93	0	0	0	0	22	46	123	0	0	0	7	30	0
d__Bacteria	k__norank_d__Bacteria	p__Firmicutes	c__Clostridia	o__Lachnospirales	f__Lachnospiraceae	g__Lachnospiraceae_NK4B4_group	s__uncultured_bacterium_g__Lachnospiraceae_NK4B4_group	ASV1476	0	0	87	26	0	0	82	0	5	0	0	0	14	0	0	0	0	0	44	0	3	0	5	0
d__Bacteria	k__norank_d__Bacteria	p__Bacteroidota	c__Bacteroidia	o__Bacteroidales	f__Muribaculaceae	g__norank_f__Muribaculaceae	s__uncultured_bacterium_g__norank_f__Muribaculaceae	ASV1211	16	0	6	13	9	0	0	10	0	7	15	0	10	1	0	0	5	10	25	0	0	0	8	0
d__Bacteria	k__norank_d__Bacteria	p__Firmicutes	c__Clostridia	o__Oscillospirales	f__Ruminococcaceae	g__Ruminococcus	s__unclassified_g__Ruminococcus	ASV911	0	0	0	0	0	0	0	0	0	0	0	0	0	0	0	0	0	0	0	0	0	0	0	3
d__Bacteria	k__norank_d__Bacteria	p__Firmicutes	c__Clostridia	o__Lachnospirales	f__Lachnospiraceae	g__Eubacterium_xylanophilum_group	s__uncultured_bacterium_g__Eubacterium_xylanophilum_group	ASV2434	0	0	0	0	0	0	0	0	0	0	225	0	0	0	0	0	0	0	0	0	0	0	0	0
d__Bacteria	k__norank_d__Bacteria	p__Firmicutes	c__Bacilli	o__Lactobacillales	f__Lactobacillaceae	g__Lactobacillus	s__unclassified_g__Lactobacillus	ASV637	0	0	0	0	0	0	0	0	0	0	0	0	0	0	0	0	0	0	0	0	0	0	0	56
d__Bacteria	k__norank_d__Bacteria	p__Bacteroidota	c__Bacteroidia	o__Bacteroidales	f__Muribaculaceae	g__norank_f__Muribaculaceae	s__unclassified_g__norank_f__Muribaculaceae	ASV2864	0	0	0	0	0	0	0	0	0	0	0	0	0	0	0	0	0	15	0	0	0	0	0	0
d__Bacteria	k__norank_d__Bacteria	p__Firmicutes	c__Clostridia	o__Peptostreptococcales-Tissierellales	f__Anaerovoracaceae	g__Family_XIII_UCG-001	s__uncultured_bacterium_g__Family_XIII_UCG-001	ASV1029	0	0	19	18	0	0	0	0	5	0	16	6	0	0	0	11	0	15	0	0	0	17	0	0
d__Bacteria	k__norank_d__Bacteria	p__Bacteroidota	c__Bacteroidia	o__Bacteroidales	f__Muribaculaceae	g__norank_f__Muribaculaceae	s__unclassified_g__norank_f__Muribaculaceae	ASV1844	0	0	15	0	0	7	0	0	9	0	0	0	11	0	0	0	0	0	0	0	0	24	8	0
d__Bacteria	k__norank_d__Bacteria	p__Bacteroidota	c__Bacteroidia	o__Bacteroidales	f__Muribaculaceae	g__norank_f__Muribaculaceae	s__unclassified_g__norank_f__Muribaculaceae	ASV1845	0	14	0	0	0	0	0	0	0	0	41	0	0	11	0	0	0	29	0	0	25	22	0	0
d__Bacteria	k__norank_d__Bacteria	p__Firmicutes	c__Bacilli	o__RF39	f__norank_o__RF39	g__norank_f__norank_o__RF39	s__unclassified_g__norank_f__norank_o__RF39	ASV2884	0	0	0	0	0	0	0	0	0	0	0	0	0	0	0	0	0	3	0	0	0	0	0	0
d__Bacteria	k__norank_d__Bacteria	p__Firmicutes	c__Clostridia	o__Oscillospirales	f__Oscillospiraceae	g__NK4A214_group	s__unclassified_g__NK4A214_group	ASV1031	0	0	13	9	0	7	6	0	0	0	0	0	0	7	0	0	0	0	0	0	0	4	11	0
d__Bacteria	k__norank_d__Bacteria	p__Desulfobacterota	c__Desulfovibrionia	o__Desulfovibrionales	f__Desulfovibrionaceae	g__Desulfovibrio	s__unclassified_g__Desulfovibrio	ASV890	0	10	0	0	0	0	0	0	0	0	0	0	0	0	0	0	0	0	0	0	0	0	0	6
d__Bacteria	k__norank_d__Bacteria	p__Campilobacterota	c__Campylobacteria	o__Campylobacterales	f__Helicobacteraceae	g__Helicobacter	s__unclassified_g__Helicobacter	ASV202	0	0	5	6	8	0	23	0	0	0	0	0	9	0	0	8	8	0	0	5	13	0	0	0
d__Bacteria	k__norank_d__Bacteria	p__Firmicutes	c__Clostridia	o__Oscillospirales	f__Oscillospiraceae	g__unclassified_f__Oscillospiraceae	s__unclassified_f__Oscillospiraceae	ASV2470	0	0	0	0	0	0	0	0	0	0	10	0	0	0	0	0	0	0	0	0	0	0	0	0
d__Bacteria	k__norank_d__Bacteria	p__Firmicutes	c__Clostridia	o__Oscillospirales	f__Oscillospiraceae	g__norank_f__Oscillospiraceae	s__unclassified_g__norank_f__Oscillospiraceae	ASV3082	0	0	0	0	0	0	14	0	0	0	0	0	0	0	0	0	0	0	0	0	0	0	0	0
d__Bacteria	k__norank_d__Bacteria	p__Firmicutes	c__Clostridia	o__Lachnospirales	f__Lachnospiraceae	g__Lachnospiraceae_NK4A136_group	s__unclassified_g__Lachnospiraceae_NK4A136_group	ASV1803	26	0	0	0	0	0	0	0	0	0	0	0	0	0	0	0	0	0	0	0	0	261	12	0
d__Bacteria	k__norank_d__Bacteria	p__Firmicutes	c__Bacilli	o__Lactobacillales	f__Lactobacillaceae	g__Lactobacillus	s__unclassified_g__Lactobacillus	ASV3038	38	0	0	0	0	0	0	0	0	0	0	0	0	0	0	0	0	0	0	0	0	0	0	0
d__Bacteria	k__norank_d__Bacteria	p__Bacteroidota	c__Bacteroidia	o__Bacteroidales	f__Muribaculaceae	g__norank_f__Muribaculaceae	s__uncultured_bacterium_g__norank_f__Muribaculaceae	ASV2740	0	0	0	0	0	0	0	0	0	0	0	0	0	0	0	6	0	0	0	0	0	0	0	0
d__Bacteria	k__norank_d__Bacteria	p__Firmicutes	c__Clostridia	o__Lachnospirales	f__Lachnospiraceae	g__Lachnospiraceae_NK4A136_group	s__unclassified_g__Lachnospiraceae_NK4A136_group	ASV1938	0	0	0	24	0	0	0	0	0	0	0	0	0	0	0	0	0	0	0	0	0	0	0	0
d__Bacteria	k__norank_d__Bacteria	p__Firmicutes	c__Clostridia	o__Oscillospirales	f__Ruminococcaceae	g__Eubacterium_siraeum_group	s__uncultured_bacterium_g__Eubacterium_siraeum_group	ASV2475	0	0	0	0	0	0	0	0	0	0	9	0	21	0	12	0	5	0	0	0	0	0	0	0
d__Bacteria	k__norank_d__Bacteria	p__Firmicutes	c__Bacilli	o__RF39	f__norank_o__RF39	g__norank_f__norank_o__RF39	s__uncultured_bacterium_g__norank_f__norank_o__RF39	ASV2909	0	3	0	0	0	0	0	0	0	0	0	0	0	0	0	0	0	0	0	0	0	0	0	0
d__Bacteria	k__norank_d__Bacteria	p__Firmicutes	c__Clostridia	o__Lachnospirales	f__Lachnospiraceae	g__Lachnospiraceae_NK4A136_group	s__unclassified_g__Lachnospiraceae_NK4A136_group	ASV1932	0	0	0	36	0	0	0	0	0	0	0	0	0	0	0	0	0	0	0	0	0	0	0	0
d__Bacteria	k__norank_d__Bacteria	p__Bacteroidota	c__Bacteroidia	o__Bacteroidales	f__Muribaculaceae	g__norank_f__Muribaculaceae	s__uncultured_bacterium_g__norank_f__Muribaculaceae	ASV2180	73	0	0	0	0	0	0	0	0	0	0	0	40	0	34	0	0	0	0	65	0	0	30	0
d__Bacteria	k__norank_d__Bacteria	p__Firmicutes	c__Clostridia	o__Lachnospirales	f__Lachnospiraceae	g__Lachnospiraceae_UCG-001	s__unclassified_g__Lachnospiraceae_UCG-001	ASV1202	0	0	0	0	11	0	27	0	85	0	0	0	0	0	0	0	0	0	0	0	0	0	0	0
d__Bacteria	k__norank_d__Bacteria	p__Desulfobacterota	c__Desulfovibrionia	o__Desulfovibrionales	f__Desulfovibrionaceae	g__norank_f__Desulfovibrionaceae	s__uncultured_bacterium_g__norank_f__Desulfovibrionaceae	ASV1586	0	0	0	2	0	2	0	5	2	0	0	0	0	0	3	0	0	0	3	0	0	0	0	0
d__Bacteria	k__norank_d__Bacteria	p__Firmicutes	c__Clostridia	o__Oscillospirales	f__Oscillospiraceae	g__norank_f__Oscillospiraceae	s__unclassified_g__norank_f__Oscillospiraceae	ASV1974	0	0	0	13	0	0	0	0	18	0	0	0	0	0	0	0	0	32	0	0	0	0	0	0
d__Bacteria	k__norank_d__Bacteria	p__Firmicutes	c__Clostridia	o__Oscillospirales	f__Oscillospiraceae	g__norank_f__Oscillospiraceae	s__unclassified_g__norank_f__Oscillospiraceae	ASV1978	0	0	25	13	0	0	0	0	0	0	0	0	0	0	0	12	0	39	0	0	0	0	0	0
d__Bacteria	k__norank_d__Bacteria	p__Firmicutes	c__Clostridia	o__Monoglobales	f__Monoglobaceae	g__Monoglobus	s__unclassified_g__Monoglobus	ASV1429	0	0	0	0	0	0	0	0	0	0	0	0	0	0	0	0	0	0	0	0	0	7	0	0
d__Bacteria	k__norank_d__Bacteria	p__Firmicutes	c__Clostridia	o__Lachnospirales	f__Lachnospiraceae	g__A2	s__uncultured_bacterium_g__A2	ASV1985	0	0	15	9	0	6	6	7	8	0	0	0	0	0	0	0	5	4	0	1	0	0	0	0
d__Bacteria	k__norank_d__Bacteria	p__Bacteroidota	c__Bacteroidia	o__Bacteroidales	f__Prevotellaceae	g__Prevotella	s__uncultured_bacterium_g__Prevotella	ASV803	54	9	38	5	4	32	16	12	11	159	22	46	9	8	41	35	8	21	7	58	27	34	2	13
d__Bacteria	k__norank_d__Bacteria	p__Firmicutes	c__Clostridia	o__Oscillospirales	f__Ruminococcaceae	g__norank_f__Ruminococcaceae	s__unclassified_g__norank_f__Ruminococcaceae	ASV1828	0	0	0	0	0	0	0	0	0	0	0	0	0	0	0	0	0	0	0	0	0	31	0	0
d__Bacteria	k__norank_d__Bacteria	p__Bacteroidota	c__Bacteroidia	o__Bacteroidales	f__Muribaculaceae	g__norank_f__Muribaculaceae	s__unclassified_g__norank_f__Muribaculaceae	ASV2487	0	0	0	0	0	0	0	0	0	0	5	0	0	0	0	0	0	0	0	0	0	0	0	0
d__Bacteria	k__norank_d__Bacteria	p__Firmicutes	c__Clostridia	o__Oscillospirales	f__Ruminococcaceae	g__Harryflintia	s__uncultured_bacterium_g__Harryflintia	ASV2035	0	0	0	2	0	0	0	0	0	3	0	0	0	0	0	0	0	0	0	0	0	0	0	0
d__Bacteria	k__norank_d__Bacteria	p__Firmicutes	c__Clostridia	o__Clostridia_UCG-014	f__norank_o__Clostridia_UCG-014	g__norank_f__norank_o__Clostridia_UCG-014	s__unclassified_g__norank_f__norank_o__Clostridia_UCG-014	ASV238	0	0	0	0	0	0	0	0	0	0	0	37	0	0	0	0	0	0	0	0	0	0	0	0
d__Bacteria	k__norank_d__Bacteria	p__Bacteroidota	c__Bacteroidia	o__Bacteroidales	f__Muribaculaceae	g__norank_f__Muribaculaceae	s__unclassified_g__norank_f__Muribaculaceae	ASV877	0	0	32	21	3	0	5	10	17	3	5	6	1	5	2	9	0	2	0	0	12	0	10	6
d__Bacteria	k__norank_d__Bacteria	p__Bacteroidota	c__Bacteroidia	o__Bacteroidales	f__Muribaculaceae	g__norank_f__Muribaculaceae	s__uncultured_bacterium_g__norank_f__Muribaculaceae	ASV1516	0	0	0	0	0	0	0	0	0	0	0	131	0	0	0	0	0	0	25	0	0	0	41	0
d__Bacteria	k__norank_d__Bacteria	p__Firmicutes	c__Clostridia	o__Oscillospirales	f__Ruminococcaceae	g__Ruminococcus	s__unclassified_g__Ruminococcus	ASV460	0	0	32	184	0	0	0	0	208	0	26	30	0	50	0	229	0	23	0	0	0	0	0	0
d__Bacteria	k__norank_d__Bacteria	p__Bacteroidota	c__Bacteroidia	o__Bacteroidales	f__Muribaculaceae	g__norank_f__Muribaculaceae	s__uncultured_bacterium_g__norank_f__Muribaculaceae	ASV1513	0	0	0	0	0	0	0	0	0	0	0	0	0	0	0	0	0	0	27	0	0	0	0	0
d__Bacteria	k__norank_d__Bacteria	p__Firmicutes	c__Clostridia	o__Oscillospirales	f__Ruminococcaceae	g__Ruminococcus	s__unclassified_g__Ruminococcus	ASV466	0	0	123	0	0	0	0	0	0	0	0	0	0	0	0	0	0	0	0	0	0	0	0	0
d__Bacteria	k__norank_d__Bacteria	p__Firmicutes	c__Clostridia	o__Lachnospirales	f__Lachnospiraceae	g__Lachnospiraceae_NK4A136_group	s__unclassified_g__Lachnospiraceae_NK4A136_group	ASV2730	0	0	0	0	0	0	0	0	0	0	0	0	0	0	0	8	0	0	0	0	0	0	0	0
d__Bacteria	k__norank_d__Bacteria	p__Firmicutes	c__Clostridia	o__Clostridia_UCG-014	f__norank_o__Clostridia_UCG-014	g__norank_f__norank_o__Clostridia_UCG-014	s__unclassified_g__norank_f__norank_o__Clostridia_UCG-014	ASV1833	0	10	8	18	0	0	0	0	0	0	0	0	14	0	0	0	0	0	0	0	0	30	0	0
d__Bacteria	k__norank_d__Bacteria	p__Firmicutes	c__Clostridia	o__Oscillospirales	f__Ruminococcaceae	g__unclassified_f__Ruminococcaceae	s__unclassified_f__Ruminococcaceae	ASV1876	0	0	0	0	0	0	0	0	0	0	0	0	0	0	0	0	0	0	0	0	0	9	0	0
d__Bacteria	k__norank_d__Bacteria	p__Firmicutes	c__Clostridia	o__Clostridia_UCG-014	f__norank_o__Clostridia_UCG-014	g__norank_f__norank_o__Clostridia_UCG-014	s__unclassified_g__norank_f__norank_o__Clostridia_UCG-014	ASV1836	0	0	0	0	0	0	0	0	0	0	0	0	0	0	0	0	0	0	0	0	0	23	0	0
d__Bacteria	k__norank_d__Bacteria	p__Firmicutes	c__Clostridia	o__Oscillospirales	f__Oscillospiraceae	g__Oscillibacter	s__unclassified_g__Oscillibacter	ASV2209	0	0	0	0	0	0	0	0	0	0	0	0	0	0	0	0	0	0	0	9	0	0	0	0
d__Bacteria	k__norank_d__Bacteria	p__Bacteroidota	c__Bacteroidia	o__Bacteroidales	f__Muribaculaceae	g__norank_f__Muribaculaceae	s__uncultured_bacterium_g__norank_f__Muribaculaceae	ASV1602	0	3	25	0	0	0	0	0	0	0	10	23	0	0	0	8	0	11	2	0	4	0	0	0
d__Bacteria	k__norank_d__Bacteria	p__Firmicutes	c__Clostridia	o__Oscillospirales	f__Oscillospiraceae	g__unclassified_f__Oscillospiraceae	s__unclassified_f__Oscillospiraceae	ASV3043	28	0	0	0	0	0	0	0	0	0	0	0	0	0	0	0	0	0	0	0	0	0	0	0
d__Bacteria	k__norank_d__Bacteria	p__Firmicutes	c__Clostridia	o__Oscillospirales	f__Ruminococcaceae	g__norank_f__Ruminococcaceae	s__uncultured_bacterium_g__norank_f__Ruminococcaceae	ASV2418	0	0	0	0	0	0	0	0	3	0	0	0	0	0	0	0	0	0	0	0	0	0	0	0
d__Bacteria	k__norank_d__Bacteria	p__Firmicutes	c__Clostridia	o__Lachnospirales	f__Lachnospiraceae	g__Lachnospiraceae_UCG-001	s__unclassified_g__Lachnospiraceae_UCG-001	ASV2362	0	0	0	0	0	0	0	0	66	0	0	0	0	0	60	0	0	0	0	0	0	0	0	0
d__Bacteria	k__norank_d__Bacteria	p__Firmicutes	c__Clostridia	o__Oscillospirales	f__Oscillospiraceae	g__unclassified_f__Oscillospiraceae	s__unclassified_f__Oscillospiraceae	ASV2060	0	0	0	0	0	0	0	0	0	28	0	0	0	0	0	0	0	0	0	0	0	0	0	0
d__Bacteria	k__norank_d__Bacteria	p__Bacteroidota	c__Bacteroidia	o__Bacteroidales	f__Muribaculaceae	g__norank_f__Muribaculaceae	s__uncultured_bacterium_g__norank_f__Muribaculaceae	ASV39	94	0	28	18	26	135	17	12	187	260	0	28	34	0	49	125	34	183	0	334	0	66	232	168
d__Bacteria	k__norank_d__Bacteria	p__Bacteroidota	c__Bacteroidia	o__Bacteroidales	f__Muribaculaceae	g__norank_f__Muribaculaceae	s__uncultured_bacterium_g__norank_f__Muribaculaceae	ASV744	0	0	0	0	0	0	0	15	0	23	0	0	0	0	0	0	0	0	0	0	0	0	0	16
d__Bacteria	k__norank_d__Bacteria	p__Bacteroidota	c__Bacteroidia	o__Bacteroidales	f__Muribaculaceae	g__norank_f__Muribaculaceae	s__uncultured_bacterium_g__norank_f__Muribaculaceae	ASV747	53	14	25	22	10	29	47	29	57	31	51	45	31	32	35	19	24	63	25	59	49	11	17	21
d__Bacteria	k__norank_d__Bacteria	p__Bacteroidota	c__Bacteroidia	o__Bacteroidales	f__Muribaculaceae	g__norank_f__Muribaculaceae	s__uncultured_bacterium_g__norank_f__Muribaculaceae	ASV740	166	0	0	19	0	95	0	0	0	0	0	11	0	43	26	0	0	0	20	0	23	54	25	19
d__Bacteria	k__norank_d__Bacteria	p__Bacteroidota	c__Bacteroidia	o__Bacteroidales	f__Muribaculaceae	g__norank_f__Muribaculaceae	s__uncultured_bacterium_g__norank_f__Muribaculaceae	ASV743	38	0	0	0	0	0	29	0	36	0	0	0	9	0	29	27	0	56	15	24	0	0	21	22
d__Bacteria	k__norank_d__Bacteria	p__Bacteroidota	c__Bacteroidia	o__Bacteroidales	f__Muribaculaceae	g__norank_f__Muribaculaceae	s__uncultured_bacterium_g__norank_f__Muribaculaceae	ASV749	0	0	0	0	0	0	0	0	0	0	0	0	0	0	0	0	0	0	0	0	0	0	0	23
d__Bacteria	k__norank_d__Bacteria	p__Bacteroidota	c__Bacteroidia	o__Bacteroidales	f__Muribaculaceae	g__norank_f__Muribaculaceae	s__uncultured_bacterium_g__norank_f__Muribaculaceae	ASV2815	0	0	0	0	0	0	0	0	0	0	0	0	0	0	0	0	0	0	0	0	0	0	4	0
d__Bacteria	k__norank_d__Bacteria	p__Firmicutes	c__Clostridia	o__Lachnospirales	f__Lachnospiraceae	g__unclassified_f__Lachnospiraceae	s__unclassified_f__Lachnospiraceae	ASV2374	0	0	0	0	0	0	10	0	29	0	0	0	5	0	0	0	0	0	0	0	0	0	0	0
d__Bacteria	k__norank_d__Bacteria	p__Bacteroidota	c__Bacteroidia	o__Bacteroidales	f__Muribaculaceae	g__norank_f__Muribaculaceae	s__unclassified_g__norank_f__Muribaculaceae	ASV726	0	0	98	40	0	43	0	0	35	39	0	78	30	0	10	15	0	109	22	48	63	0	0	27
d__Bacteria	k__norank_d__Bacteria	p__Bacteroidota	c__Bacteroidia	o__Bacteroidales	f__Muribaculaceae	g__norank_f__Muribaculaceae	s__unclassified_g__norank_f__Muribaculaceae	ASV725	0	17	0	0	0	0	0	38	32	26	32	0	19	17	22	8	11	0	3	34	8	3	0	21
d__Bacteria	k__norank_d__Bacteria	p__Bacteroidota	c__Bacteroidia	o__Bacteroidales	f__Muribaculaceae	g__norank_f__Muribaculaceae	s__unclassified_g__norank_f__Muribaculaceae	ASV721	0	0	0	0	0	11	0	0	14	0	0	0	19	0	0	0	0	0	21	0	34	0	0	21
d__Bacteria	k__norank_d__Bacteria	p__Firmicutes	c__Clostridia	o__Oscillospirales	f__Ruminococcaceae	g__Ruminococcus	s__unclassified_g__Ruminococcus	ASV2871	0	0	0	0	0	0	0	0	0	0	0	0	0	0	0	0	0	4	0	0	0	0	0	0
d__Bacteria	k__norank_d__Bacteria	p__Firmicutes	c__Bacilli	o__Lactobacillales	f__Lactobacillaceae	g__Lactobacillus	s__unclassified_g__Lactobacillus	ASV2977	0	0	0	0	0	0	0	0	0	0	0	0	0	0	0	0	22	0	0	0	0	0	0	0
d__Bacteria	k__norank_d__Bacteria	p__Firmicutes	c__Clostridia	o__Oscillospirales	f__Ruminococcaceae	g__norank_f__Ruminococcaceae	s__Ruminococcaceae_bacterium_Marseille-P3738	ASV2790	0	0	0	0	0	0	0	3	0	0	0	0	0	0	0	0	0	0	0	0	0	0	0	0
d__Bacteria	k__norank_d__Bacteria	p__Bacteroidota	c__Bacteroidia	o__Bacteroidales	f__Prevotellaceae	g__Prevotellaceae_UCG-001	s__unclassified_g__Prevotellaceae_UCG-001	ASV796	0	0	0	0	0	6	0	0	0	0	0	0	0	9	8	20	0	0	0	0	0	0	0	16
d__Bacteria	k__norank_d__Bacteria	p__Firmicutes	c__Clostridia	o__Lachnospirales	f__Lachnospiraceae	g__Blautia	s__unclassified_g__Blautia	ASV1580	0	0	0	0	0	0	5	3	0	0	0	0	5	0	0	0	0	0	4	0	0	0	0	0
d__Bacteria	k__norank_d__Bacteria	p__Firmicutes	c__Clostridia	o__Lachnospirales	f__Lachnospiraceae	g__unclassified_f__Lachnospiraceae	s__unclassified_f__Lachnospiraceae	ASV684	3	11	0	16	20	0	41	24	39	0	0	0	29	0	23	23	32	37	0	6	9	30	14	35
d__Bacteria	k__norank_d__Bacteria	p__Firmicutes	c__Clostridia	o__Lachnospirales	f__Lachnospiraceae	g__unclassified_f__Lachnospiraceae	s__unclassified_f__Lachnospiraceae	ASV195	0	0	0	0	0	0	0	0	0	0	0	0	53	0	184	0	0	145	6	24	0	23	0	0
d__Bacteria	k__norank_d__Bacteria	p__Firmicutes	c__Clostridia	o__Lachnospirales	f__Lachnospiraceae	g__unclassified_f__Lachnospiraceae	s__unclassified_f__Lachnospiraceae	ASV194	0	0	0	0	0	0	0	0	0	0	0	0	0	0	0	15	15	0	0	0	0	0	0	0
d__Bacteria	k__norank_d__Bacteria	p__Firmicutes	c__Clostridia	o__Lachnospirales	f__Lachnospiraceae	g__unclassified_f__Lachnospiraceae	s__unclassified_f__Lachnospiraceae	ASV192	0	0	0	0	0	0	0	0	0	0	0	0	0	0	0	0	0	62	0	0	0	0	0	0
d__Bacteria	k__norank_d__Bacteria	p__Firmicutes	c__Clostridia	o__Clostridia_vadinBB60_group	f__norank_o__Clostridia_vadinBB60_group	g__norank_f__norank_o__Clostridia_vadinBB60_group	s__unclassified_g__norank_f__norank_o__Clostridia_vadinBB60_group	ASV2229	0	0	0	0	0	0	0	0	0	0	0	0	0	0	0	0	0	0	0	4	0	0	0	0
d__Bacteria	k__norank_d__Bacteria	p__Firmicutes	c__Clostridia	o__Lachnospirales	f__Lachnospiraceae	g__Eubacterium_xylanophilum_group	s__uncultured_bacterium_g__Eubacterium_xylanophilum_group	ASV1298	21	0	0	0	0	0	0	0	0	105	0	0	16	52	0	0	0	0	0	0	0	66	0	0
d__Bacteria	k__norank_d__Bacteria	p__Actinobacteriota	c__Coriobacteriia	o__Coriobacteriales	f__Eggerthellaceae	g__unclassified_f__Eggerthellaceae	s__unclassified_f__Eggerthellaceae	ASV2558	0	0	0	0	0	1	0	0	0	0	0	0	0	0	0	0	0	0	0	0	0	0	0	0
d__Bacteria	k__norank_d__Bacteria	p__Firmicutes	c__Clostridia	o__Lachnospirales	f__Lachnospiraceae	g__unclassified_f__Lachnospiraceae	s__unclassified_f__Lachnospiraceae	ASV204	0	6	0	0	0	0	0	12	11	0	0	0	0	0	0	0	0	0	0	0	0	0	0	0
[truncated: 259 more rows]
