# Supplementary material for: Different gut microbial types were found in captive striped hamsters
Source: PeerJ journal article supplement (doi:10.7717/peerj.16365), 2023-11-06
Supplement: Table_S1.pdf [file Table_S1.pdf]

**Table S1** Network indices of the two gut microbial types.

| Network indices                | Type1 | Type2 |
|--------------------------------|-------|-------|
| Total nodes                    | 21    | 22    |
| Total links                    | 25    | 36    |
| Positive links                 | 14    | 21    |
| Negative links                 | 11    | 15    |
| Average Degree                 | 2.381 | 3.273 |
| Network Diameter               | 9     | 6     |
| Average path length            | 3.804 | 2.466 |
| Density                        | 0.119 | 0.156 |
| Average Clustering Coefficient | 0.397 | 0.563 |
| Total triangles                | 8     | 25    |
